# Supplementary material for: Exploiting hydrophobicity and hydrophilicity in nanopores as a design principle for “smart” MOF microtanks for methane storage
Source: Royal Society of Chemistry journal article supplement (doi:10.1039/c9me00072k), 2019-07-22
Supplement: c9me00072k2.csv [file c9me00072k2.csv]

name	topology	component0	component1	mol_frac0	mol_frac1	temp	methane_pressure	charge_included	loading0	loading1	nmol0	nmol1	percent_gas	percent_sealant	VF	SA_grav	LPD
OPT_acs_sym_7_mc_4_1B_2Br	acs	methane	22-dimethylbutane	0.989153	0.0108468	298	4.00E+06	FALSE	19.55794861	83.98995391	14.11	60.5942	18.88782692	81.11217308	0.682502	1569.357411	8.45793
OPT_acs_sym_7_mc_4_1B_2Br	acs	methane	22-dimethylbutane	0.992743	0.00725744	298	6.00E+06	FALSE	34.94177912	77.67762946	25.2086	56.0402	31.02642747	68.97357253	0.682502	1569.357411	8.45793
OPT_acs_sym_7_mc_4_1B_2Br	acs	methane	22-dimethylbutane	0.994547	0.00545297	298	8.00E+06	FALSE	56.63072632	69.5389724	40.856	50.1686	44.88456967	55.11543033	0.682502	1569.357411	8.45793
OPT_acs_sym_7_mc_4_1B_2Br	acs	methane	22-dimethylbutane	0.995633	0.00436714	298	1.00E+07	FALSE	71.73733573	63.25104341	51.7546	45.6322	53.14334181	46.85665819	0.682502	1569.357411	8.45793
OPT_acs_sym_7_mc_4_1B_2Br	acs	methane	methanol	0.995789	0.00421093	298	4.00E+06	FALSE	150.8038429	31.22258084	108.7968	22.5254	82.84722614	17.15277386	0.682502	1569.357411	8.45793
OPT_acs_sym_7_mc_4_1B_2Br	acs	methane	methanol	0.995789	0.00421093	298	4.00E+06	TRUE	24.25629181	245.7337731	17.4996	177.2836	8.98414237	91.01585763	0.682502	1569.357411	8.45793
OPT_acs_sym_7_mc_4_1B_2Br	acs	methane	methanol	0.997189	0.00281124	298	6.00E+06	FALSE	180.6203583	7.386001769	130.3078	5.3286	96.07140856	3.92859144	0.682502	1569.357411	8.45793
OPT_acs_sym_7_mc_4_1B_2Br	acs	methane	methanol	0.997189	0.00281124	298	6.00E+06	TRUE	68.33555561	179.988017	49.3004	129.8516	27.51875502	72.48124498	0.682502	1569.357411	8.45793
OPT_acs_sym_7_mc_4_1B_2Br	acs	methane	methanol	0.99789	0.00210991	298	8.00E+06	FALSE	197.3062963	0.75847693	142.3458	0.5472	99.61705612	0.382943881	0.682502	1569.357411	8.45793
OPT_acs_sym_7_mc_4_1B_2Br	acs	methane	methanol	0.99789	0.00210991	298	8.00E+06	TRUE	88.48232183	159.5534953	63.8352	115.1092	35.67320352	64.32679648	0.682502	1569.357411	8.45793
OPT_acs_sym_7_mc_4_1B_2Br	acs	methane	methanol	0.998311	0.00168864	298	1.00E+07	FALSE	206.0326621	0.528106196	148.6414	0.381	99.74433374	0.255666262	0.682502	1569.357411	8.45793
OPT_acs_sym_7_mc_4_1B_2Br	acs	methane	methanol	0.998311	0.00168864	298	1.00E+07	TRUE	118.3115894	126.3745651	85.3554	91.1724	48.35238416	51.64761584	0.682502	1569.357411	8.45793
OPT_acs_sym_7_mc_4_1B_2CF3	acs	methane	22-dimethylbutane	0.989153	0.0108468	298	4.00E+06	FALSE	50.05858681	56.36448482	36.9452	41.5992	47.03734448	52.96265552	0.559815	1187.91758	8.69514
OPT_acs_sym_7_mc_4_1B_2CF3	acs	methane	22-dimethylbutane	0.992743	0.00725744	298	6.00E+06	FALSE	66.59022875	49.25564845	49.1462	36.3526	57.48174243	42.51825757	0.559815	1187.91758	8.69514
OPT_acs_sym_7_mc_4_1B_2CF3	acs	methane	22-dimethylbutane	0.994547	0.00545297	298	8.00E+06	FALSE	87.47475593	41.54305011	64.5598	30.6604	67.80052972	32.19947028	0.559815	1187.91758	8.69514
OPT_acs_sym_7_mc_4_1B_2CF3	acs	methane	22-dimethylbutane	0.995633	0.00436714	298	1.00E+07	FALSE	107.4007975	33.86188643	79.266	24.9914	76.02913558	23.97086442	0.559815	1187.91758	8.69514
OPT_acs_sym_7_mc_4_1B_2CF3	acs	methane	methanol	0.995789	0.00421093	298	4.00E+06	FALSE	127.4547455	16.35875139	94.0666	12.0734	88.62502355	11.37497645	0.559815	1187.91758	8.69514
OPT_acs_sym_7_mc_4_1B_2CF3	acs	methane	methanol	0.995789	0.00421093	298	4.00E+06	TRUE	41.23845925	177.6230825	30.4356	131.0928	18.84225932	81.15774068	0.559815	1187.91758	8.69514
OPT_acs_sym_7_mc_4_1B_2CF3	acs	methane	methanol	0.997189	0.00281124	298	6.00E+06	FALSE	150.6551388	6.866843811	111.1894	5.068	95.6407076	4.359292398	0.559815	1187.91758	8.69514
OPT_acs_sym_7_mc_4_1B_2CF3	acs	methane	methanol	0.997189	0.00281124	298	6.00E+06	TRUE	62.11106295	153.8330187	45.8404	113.5348	28.76256783	71.23743217	0.559815	1187.91758	8.69514
OPT_acs_sym_7_mc_4_1B_2CF3	acs	methane	methanol	0.99789	0.00210991	298	8.00E+06	FALSE	164.9142727	0.999675881	121.7132	0.7378	99.39747328	0.602526725	0.559815	1187.91758	8.69514
OPT_acs_sym_7_mc_4_1B_2CF3	acs	methane	methanol	0.99789	0.00210991	298	8.00E+06	TRUE	88.67035636	115.502535	65.4422	85.2454	43.42905455	56.57094545	0.559815	1187.91758	8.69514
OPT_acs_sym_7_mc_4_1B_2CF3	acs	methane	methanol	0.998311	0.00168864	298	1.00E+07	FALSE	173.8959093	0.329250798	128.342	0.243	99.81101995	0.188980052	0.559815	1187.91758	8.69514
OPT_acs_sym_7_mc_4_1B_2CF3	acs	methane	methanol	0.998311	0.00168864	298	1.00E+07	TRUE	112.744145	86.79186539	83.2096	64.0558	56.50315689	43.49684311	0.559815	1187.91758	8.69514
OPT_acs_sym_7_mc_4_1B_2CH3	acs	methane	22-dimethylbutane	0.989153	0.0108468	298	4.00E+06	FALSE	83.11857037	42.77794197	59.202	30.469	66.02134469	33.97865531	0.582585	1624.018355	9.12205
OPT_acs_sym_7_mc_4_1B_2CH3	acs	methane	22-dimethylbutane	0.992743	0.00725744	298	6.00E+06	FALSE	110.3476873	31.26865525	78.5962	22.2714	77.92016465	22.07983535	0.582585	1624.018355	9.12205
OPT_acs_sym_7_mc_4_1B_2CH3	acs	methane	22-dimethylbutane	0.994547	0.00545297	298	8.00E+06	FALSE	128.5067966	24.65365143	91.5302	17.5598	83.90338253	16.09661747	0.582585	1624.018355	9.12205
OPT_acs_sym_7_mc_4_1B_2CH3	acs	methane	22-dimethylbutane	0.995633	0.00436714	298	1.00E+07	FALSE	144.2920523	17.32093177	102.7734	12.337	89.28246275	10.71753725	0.582585	1624.018355	9.12205
OPT_acs_sym_7_mc_4_1B_2CH3	acs	methane	methanol	0.995789	0.00421093	298	4.00E+06	FALSE	127.8107021	8.627191501	91.0344	6.1448	93.6768362	6.323163805	0.582585	1624.018355	9.12205
OPT_acs_sym_7_mc_4_1B_2CH3	acs	methane	methanol	0.995789	0.00421093	298	4.00E+06	TRUE	40.21146201	192.0443042	28.641	136.7854	17.31343969	82.68656031	0.582585	1624.018355	9.12205
OPT_acs_sym_7_mc_4_1B_2CH3	acs	methane	methanol	0.997189	0.00281124	298	6.00E+06	FALSE	149.9967139	0.923258874	106.8366	0.6576	99.38824606	0.611753936	0.582585	1624.018355	9.12205
OPT_acs_sym_7_mc_4_1B_2CH3	acs	methane	methanol	0.997189	0.00281124	298	6.00E+06	TRUE	61.08334626	159.1051906	43.5072	113.3242	27.74138342	72.25861658	0.582585	1624.018355	9.12205
OPT_acs_sym_7_mc_4_1B_2CH3	acs	methane	methanol	0.99789	0.00210991	298	8.00E+06	FALSE	163.6274181	0.476230855	116.5452	0.3392	99.70979874	0.290201259	0.582585	1624.018355	9.12205
OPT_acs_sym_7_mc_4_1B_2CH3	acs	methane	methanol	0.99789	0.00210991	298	8.00E+06	TRUE	91.8316856	123.9562086	65.408	88.289	42.55645849	57.44354151	0.582585	1624.018355	9.12205
OPT_acs_sym_7_mc_4_1B_2CH3	acs	methane	methanol	0.998311	0.00168864	298	1.00E+07	FALSE	171.8637409	1.520232222	122.4116	1.0828	99.12319911	0.876800891	0.582585	1624.018355	9.12205
OPT_acs_sym_7_mc_4_1B_2CH3	acs	methane	methanol	0.998311	0.00168864	298	1.00E+07	TRUE	111.6441247	99.25426014	79.5196	70.6948	52.93740147	47.06259853	0.582585	1624.018355	9.12205
OPT_acs_sym_7_mc_4_1B_2CN	acs	methane	22-dimethylbutane	0.989153	0.0108468	298	4.00E+06	FALSE	35.97400285	73.03056498	26.179	53.1458	33.00228932	66.99771068	0.666335	2129.937695	8.54312
OPT_acs_sym_7_mc_4_1B_2CN	acs	methane	22-dimethylbutane	0.992743	0.00725744	298	6.00E+06	FALSE	53.36503327	66.07266873	38.8348	48.0824	44.6802244	55.3197756	0.666335	2129.937695	8.54312
OPT_acs_sym_7_mc_4_1B_2CN	acs	methane	22-dimethylbutane	0.994547	0.00545297	298	8.00E+06	FALSE	84.74661022	54.47562531	61.6718	39.643	60.87146202	39.12853798	0.666335	2129.937695	8.54312
OPT_acs_sym_7_mc_4_1B_2CN	acs	methane	22-dimethylbutane	0.995633	0.00436714	298	1.00E+07	FALSE	112.8332384	43.7734316	82.111	31.8548	72.04880762	27.95119238	0.666335	2129.937695	8.54312
OPT_acs_sym_7_mc_4_1B_2CN	acs	methane	methanol	0.995789	0.00421093	298	4.00E+06	FALSE	142.5592334	47.69719369	103.7432	34.7102	74.93004867	25.06995133	0.666335	2129.937695	8.54312
OPT_acs_sym_7_mc_4_1B_2CN	acs	methane	methanol	0.995789	0.00421093	298	4.00E+06	TRUE	13.67421606	291.7908137	9.951	212.342	4.476524227	95.52347577	0.666335	2129.937695	8.54312
OPT_acs_sym_7_mc_4_1B_2CN	acs	methane	methanol	0.997189	0.00281124	298	6.00E+06	FALSE	184.578144	9.806244667	134.3212	7.1362	94.95523034	5.044769662	0.666335	2129.937695	8.54312
OPT_acs_sym_7_mc_4_1B_2CN	acs	methane	methanol	0.997189	0.00281124	298	6.00E+06	TRUE	26.3727821	273.9202032	19.192	199.3372	8.782350368	91.21764963	0.666335	2129.937695	8.54312
OPT_acs_sym_7_mc_4_1B_2CN	acs	methane	methanol	0.99789	0.00210991	298	8.00E+06	FALSE	203.2144336	1.261474259	147.8832	0.918	99.38306949	0.616930509	0.666335	2129.937695	8.54312
OPT_acs_sym_7_mc_4_1B_2CN	acs	methane	methanol	0.99789	0.00210991	298	8.00E+06	TRUE	42.60265157	250.3017774	31.0028	182.1496	14.54489839	85.45510161	0.666335	2129.937695	8.54312
OPT_acs_sym_7_mc_4_1B_2CN	acs	methane	methanol	0.998311	0.00168864	298	1.00E+07	FALSE	211.2837464	3.801187466	153.7554	2.7662	98.23270398	1.767296015	0.666335	2129.937695	8.54312
OPT_acs_sym_7_mc_4_1B_2CN	acs	methane	methanol	0.998311	0.00168864	298	1.00E+07	TRUE	66.77486192	222.3718028	48.5934	161.8244	23.09376868	76.90623132	0.666335	2129.937695	8.54312
OPT_acs_sym_7_mc_4_1B_2F	acs	methane	22-dimethylbutane	0.989153	0.0108468	298	4.00E+06	FALSE	47.69566984	85.07564189	35.4436	63.2214	35.92317438	64.07682562	0.736894	2694.383154	10.59741
OPT_acs_sym_7_mc_4_1B_2F	acs	methane	22-dimethylbutane	0.992743	0.00725744	298	6.00E+06	FALSE	73.86183867	75.75843713	54.8882	56.2976	49.36619604	50.63380396	0.736894	2694.383154	10.59741
OPT_acs_sym_7_mc_4_1B_2F	acs	methane	22-dimethylbutane	0.994547	0.00545297	298	8.00E+06	FALSE	95.56520126	66.80106664	71.0164	49.6412	58.85779263	41.14220737	0.736894	2694.383154	10.59741
OPT_acs_sym_7_mc_4_1B_2F	acs	methane	22-dimethylbutane	0.995633	0.00436714	298	1.00E+07	FALSE	137.6542386	48.01405723	102.2936	35.6802	74.13987293	25.86012707	0.736894	2694.383154	10.59741
OPT_acs_sym_7_mc_4_1B_2F	acs	methane	methanol	0.995789	0.00421093	298	4.00E+06	FALSE	167.1076295	16.27516701	124.181	12.0944	91.12503064	8.874969364	0.736894	2694.383154	10.59741
OPT_acs_sym_7_mc_4_1B_2F	acs	methane	methanol	0.995789	0.00421093	298	4.00E+06	TRUE	26.32765018	297.639464	19.5646	221.1818	8.126642808	91.87335719	0.736894	2694.383154	10.59741
OPT_acs_sym_7_mc_4_1B_2F	acs	methane	methanol	0.997189	0.00281124	298	6.00E+06	FALSE	201.9294678	3.576273634	150.0578	2.6576	98.25976948	1.74023052	0.736894	2694.383154	10.59741
OPT_acs_sym_7_mc_4_1B_2F	acs	methane	methanol	0.997189	0.00281124	298	6.00E+06	TRUE	58.76225589	258.8050833	43.6674	192.3232	18.50387261	81.49612739	0.736894	2694.383154	10.59741
OPT_acs_sym_7_mc_4_1B_2F	acs	methane	methanol	0.99789	0.00210991	298	8.00E+06	FALSE	217.7013513	5.667457117	161.7782	4.2116	97.46273566	2.537264338	0.736894	2694.383154	10.59741
OPT_acs_sym_7_mc_4_1B_2F	acs	methane	methanol	0.99789	0.00210991	298	8.00E+06	TRUE	101.9450603	206.5115011	75.7574	153.4628	33.05005405	66.94994595	0.736894	2694.383154	10.59741
OPT_acs_sym_7_mc_4_1B_2F	acs	methane	methanol	0.998311	0.00168864	298	1.00E+07	FALSE	232.2909221	0.466142831	172.62	0.3464	99.79972989	0.20027011	0.736894	2694.383154	10.59741
OPT_acs_sym_7_mc_4_1B_2F	acs	methane	methanol	0.998311	0.00168864	298	1.00E+07	TRUE	138.7367019	160.7334223	103.098	119.4442	46.32739319	53.67260681	0.736894	2694.383154	10.59741
OPT_acs_sym_7_mc_4_1B_2NH2	acs	methane	22-dimethylbutane	0.989153	0.0108468	298	4.00E+06	FALSE	46.16541474	73.164629	33.6094	53.2654	38.6871682	61.3128318	0.65286	2001.998926	10.79415
OPT_acs_sym_7_mc_4_1B_2NH2	acs	methane	22-dimethylbutane	0.992743	0.00725744	298	6.00E+06	FALSE	74.56843431	61.13833064	54.2874	44.51	54.94820714	45.05179286	0.65286	2001.998926	10.79415
OPT_acs_sym_7_mc_4_1B_2NH2	acs	methane	22-dimethylbutane	0.994547	0.00545297	298	8.00E+06	FALSE	104.1269148	47.92992382	75.8066	34.894	68.4789423	31.5210577	0.65286	2001.998926	10.79415
OPT_acs_sym_7_mc_4_1B_2NH2	acs	methane	22-dimethylbutane	0.995633	0.00436714	298	1.00E+07	FALSE	139.0989739	32.24356714	101.267	23.474	81.18180871	18.81819129	0.65286	2001.998926	10.79415
OPT_acs_sym_7_mc_4_1B_2NH2	acs	methane	methanol	0.995789	0.00421093	298	4.00E+06	FALSE	142.0628987	17.57174137	103.4248	12.7926	88.99252608	11.00747392	0.65286	2001.998926	10.79415
OPT_acs_sym_7_mc_4_1B_2NH2	acs	methane	methanol	0.995789	0.00421093	298	4.00E+06	TRUE	19.93760659	267.6152888	14.515	194.8296	6.933544023	93.06645598	0.65286	2001.998926	10.79415
OPT_acs_sym_7_mc_4_1B_2NH2	acs	methane	methanol	0.997189	0.00281124	298	6.00E+06	FALSE	170.0225245	0.999146747	123.78	0.7274	99.4157777	0.584222303	0.65286	2001.998926	10.79415
OPT_acs_sym_7_mc_4_1B_2NH2	acs	methane	methanol	0.997189	0.00281124	298	6.00E+06	TRUE	33.7946209	244.5731022	24.6032	178.0544	12.14027996	87.85972004	0.65286	2001.998926	10.79415
OPT_acs_sym_7_mc_4_1B_2NH2	acs	methane	methanol	0.99789	0.00210991	298	8.00E+06	FALSE	184.6553404	0.654376561	134.433	0.4764	99.64687412	0.353125876	0.65286	2001.998926	10.79415
OPT_acs_sym_7_mc_4_1B_2NH2	acs	methane	methanol	0.99789	0.00210991	298	8.00E+06	TRUE	62.7989966	202.9707415	45.719	147.767	23.62909978	76.37090022	0.65286	2001.998926	10.79415
OPT_acs_sym_7_mc_4_1B_2NH2	acs	methane	methanol	0.998311	0.00168864	298	1.00E+07	FALSE	194.4421435	0.428833674	141.558	0.3122	99.77993969	0.220060309	0.65286	2001.998926	10.79415
OPT_acs_sym_7_mc_4_1B_2NH2	acs	methane	methanol	0.998311	0.00168864	298	1.00E+07	TRUE	81.2487344	182.4971615	59.1508	132.8618	30.80568671	69.19431329	0.65286	2001.998926	10.79415
OPT_acs_sym_7_mc_4_1B_2NO2	acs	methane	22-dimethylbutane	0.989153	0.0108468	298	4.00E+06	FALSE	62.69170572	61.81805623	46.4564	45.809	50.35083574	49.64916426	0.631588	1748.218982	8.12518
OPT_acs_sym_7_mc_4_1B_2NO2	acs	methane	22-dimethylbutane	0.992743	0.00725744	298	6.00E+06	FALSE	83.51139119	53.9603388	61.8844	39.9862	60.74804703	39.25195297	0.631588	1748.218982	8.12518
OPT_acs_sym_7_mc_4_1B_2NO2	acs	methane	22-dimethylbutane	0.994547	0.00545297	298	8.00E+06	FALSE	105.3178121	45.71073411	78.0436	33.873	69.73371243	30.26628757	0.631588	1748.218982	8.12518
OPT_acs_sym_7_mc_4_1B_2NO2	acs	methane	22-dimethylbutane	0.995633	0.00436714	298	1.00E+07	FALSE	116.3929455	41.04722172	86.2506	30.4172	73.92836755	26.07163245	0.631588	1748.218982	8.12518
OPT_acs_sym_7_mc_4_1B_2NO2	acs	methane	methanol	0.995789	0.00421093	298	4.00E+06	FALSE	142.0677687	26.72849249	105.2764	19.8066	84.16523428	15.83476572	0.631588	1748.218982	8.12518
OPT_acs_sym_7_mc_4_1B_2NO2	acs	methane	methanol	0.995789	0.00421093	298	4.00E+06	TRUE	14.73976513	269.2017178	10.9226	199.4864	5.191127756	94.80887224	0.631588	1748.218982	8.12518
OPT_acs_sym_7_mc_4_1B_2NO2	acs	methane	methanol	0.997189	0.00281124	298	6.00E+06	FALSE	174.3801148	2.043913379	129.2208	1.5146	98.84147675	1.158523246	0.631588	1748.218982	8.12518
OPT_acs_sym_7_mc_4_1B_2NO2	acs	methane	methanol	0.997189	0.00281124	298	6.00E+06	TRUE	34.82776577	232.873067	25.8084	172.5658	13.00995795	86.99004205	0.631588	1748.218982	8.12518
OPT_acs_sym_7_mc_4_1B_2NO2	acs	methane	methanol	0.99789	0.00210991	298	8.00E+06	FALSE	188.1048056	0.813732845	139.3912	0.603	99.56926787	0.43073213	0.631588	1748.218982	8.12518
OPT_acs_sym_7_mc_4_1B_2NO2	acs	methane	methanol	0.99789	0.00210991	298	8.00E+06	TRUE	45.34340727	226.6096182	33.6008	167.9244	16.6732498	83.3267502	0.631588	1748.218982	8.12518
OPT_acs_sym_7_mc_4_1B_2NO2	acs	methane	methanol	0.998311	0.00168864	298	1.00E+07	FALSE	197.5986253	0.452343698	146.4264	0.3352	99.77160238	0.228397619	0.631588	1748.218982	8.12518
OPT_acs_sym_7_mc_4_1B_2NO2	acs	methane	methanol	0.998311	0.00168864	298	1.00E+07	TRUE	62.15704411	195.7733268	46.0602	145.0738	24.09838124	75.90161876	0.631588	1748.218982	8.12518
OPT_acs_sym_7_mc_4_1B_2OH	acs	methane	22-dimethylbutane	0.989153	0.0108468	298	4.00E+06	FALSE	38.97781472	83.43646334	28.623	61.2708	31.8409056	68.1590944	0.707128	2525.19821	9.43991
OPT_acs_sym_7_mc_4_1B_2OH	acs	methane	22-dimethylbutane	0.992743	0.00725744	298	6.00E+06	FALSE	69.00528933	70.7129433	50.6734	51.9274	49.38889365	50.61110635	0.707128	2525.19821	9.43991
OPT_acs_sym_7_mc_4_1B_2OH	acs	methane	22-dimethylbutane	0.994547	0.00545297	298	8.00E+06	FALSE	91.39244226	60.93927975	67.1132	44.7502	59.99567329	40.00432671	0.707128	2525.19821	9.43991
OPT_acs_sym_7_mc_4_1B_2OH	acs	methane	22-dimethylbutane	0.995633	0.00436714	298	1.00E+07	FALSE	121.0737561	49.26322976	88.9094	36.176	71.07895886	28.92104114	0.707128	2525.19821	9.43991
OPT_acs_sym_7_mc_4_1B_2OH	acs	methane	methanol	0.995789	0.00421093	298	4.00E+06	FALSE	149.3396508	45.28850853	109.6662	33.2572	76.73075228	23.26924772	0.707128	2525.19821	9.43991
OPT_acs_sym_7_mc_4_1B_2OH	acs	methane	methanol	0.995789	0.00421093	298	4.00E+06	TRUE	10.87723834	327.4158225	7.9876	240.4348	3.215330019	96.78466998	0.707128	2525.19821	9.43991
OPT_acs_sym_7_mc_4_1B_2OH	acs	methane	methanol	0.997189	0.00281124	298	6.00E+06	FALSE	191.5423986	10.68550175	140.6574	7.8468	94.71610904	5.283890961	0.707128	2525.19821	9.43991
OPT_acs_sym_7_mc_4_1B_2OH	acs	methane	methanol	0.997189	0.00281124	298	6.00E+06	TRUE	22.4100306	304.8927653	16.4566	223.8952	6.846880281	93.15311972	0.707128	2525.19821	9.43991
OPT_acs_sym_7_mc_4_1B_2OH	acs	methane	methanol	0.99789	0.00210991	298	8.00E+06	FALSE	213.6724502	0.881879356	156.9084	0.6476	99.58897154	0.41102846	0.707128	2525.19821	9.43991
OPT_acs_sym_7_mc_4_1B_2OH	acs	methane	methanol	0.99789	0.00210991	298	8.00E+06	TRUE	37.47497028	293.2142642	27.5194	215.3192	11.33238291	88.66761709	0.707128	2525.19821	9.43991
OPT_acs_sym_7_mc_4_1B_2OH	acs	methane	methanol	0.998311	0.00168864	298	1.00E+07	FALSE	225.3819997	0.536535618	165.5072	0.394	99.76250925	0.237490748	0.707128	2525.19821	9.43991
OPT_acs_sym_7_mc_4_1B_2OH	acs	methane	methanol	0.998311	0.00168864	298	1.00E+07	TRUE	56.34904051	261.0063306	41.3794	191.6676	17.7558175	82.2441825	0.707128	2525.19821	9.43991
OPT_acs_sym_7_mc_4_1B_2SH	acs	methane	22-dimethylbutane	0.989153	0.0108468	298	4.00E+06	FALSE	36.46872626	87.4975082	27.1706	65.189	29.41827379	70.58172621	0.675618	1918.986812	9.68961
OPT_acs_sym_7_mc_4_1B_2SH	acs	methane	22-dimethylbutane	0.992743	0.00725744	298	6.00E+06	FALSE	59.74618543	75.92817101	44.5132	56.5694	44.03646127	55.96353873	0.675618	1918.986812	9.68961
OPT_acs_sym_7_mc_4_1B_2SH	acs	methane	22-dimethylbutane	0.994547	0.00545297	298	8.00E+06	FALSE	73.15757542	70.1137053	54.5052	52.2374	51.06227504	48.93772496	0.675618	1918.986812	9.68961
OPT_acs_sym_7_mc_4_1B_2SH	acs	methane	22-dimethylbutane	0.995633	0.00436714	298	1.00E+07	FALSE	93.25667475	60.82022409	69.4798	45.3134	60.52605903	39.47394097	0.675618	1918.986812	9.68961
OPT_acs_sym_7_mc_4_1B_2SH	acs	methane	methanol	0.995789	0.00421093	298	4.00E+06	FALSE	153.2074134	26.29582724	114.1454	19.5914	85.35077854	14.64922146	0.675618	1918.986812	9.68961
OPT_acs_sym_7_mc_4_1B_2SH	acs	methane	methanol	0.995789	0.00421093	298	4.00E+06	TRUE	21.36990638	267.9121113	15.9214	199.6048	7.387222528	92.61277747	0.675618	1918.986812	9.68961
OPT_acs_sym_7_mc_4_1B_2SH	acs	methane	methanol	0.997189	0.00281124	298	6.00E+06	FALSE	183.779799	6.870787164	136.923	5.119	96.39613635	3.603863646	0.675618	1918.986812	9.68961
OPT_acs_sym_7_mc_4_1B_2SH	acs	methane	methanol	0.997189	0.00281124	298	6.00E+06	TRUE	40.06236673	245.4246786	29.848	182.8508	14.03298937	85.96701063	0.675618	1918.986812	9.68961
OPT_acs_sym_7_mc_4_1B_2SH	acs	methane	methanol	0.99789	0.00210991	298	8.00E+06	FALSE	195.644423	7.064065803	145.7626	5.263	96.51516034	3.484839656	0.675618	1918.986812	9.68961
OPT_acs_sym_7_mc_4_1B_2SH	acs	methane	methanol	0.99789	0.00210991	298	8.00E+06	TRUE	51.91759523	234.3213577	38.6806	174.5784	18.13785116	81.86214884	0.675618	1918.986812	9.68961
OPT_acs_sym_7_mc_4_1B_2SH	acs	methane	methanol	0.998311	0.00168864	298	1.00E+07	FALSE	209.6321591	0.467358486	156.184	0.3482	99.77755376	0.222446244	0.675618	1918.986812	9.68961
OPT_acs_sym_7_mc_4_1B_2SH	acs	methane	methanol	0.998311	0.00168864	298	1.00E+07	TRUE	75.78321203	199.1325655	56.4614	148.3614	27.5659741	72.4340259	0.675618	1918.986812	9.68961
OPT_acs_sym_7_mc_4_1B_4Br	acs	methane	22-dimethylbutane	0.989153	0.0108468	298	4.00E+06	FALSE	86.38459347	53.17437055	62.9014	38.7192	61.89827653	38.10172347	0.61641	860.562231	9.92757
OPT_acs_sym_7_mc_4_1B_4Br	acs	methane	22-dimethylbutane	0.992743	0.00725744	298	6.00E+06	FALSE	95.57906058	51.03636511	69.5964	37.1624	65.19031686	34.80968314	0.61641	860.562231	9.92757
OPT_acs_sym_7_mc_4_1B_4Br	acs	methane	22-dimethylbutane	0.994547	0.00545297	298	8.00E+06	FALSE	116.6976323	42.38051936	84.974	30.8596	73.35868004	26.64131996	0.61641	860.562231	9.92757
OPT_acs_sym_7_mc_4_1B_4Br	acs	methane	22-dimethylbutane	0.995633	0.00436714	298	1.00E+07	FALSE	130.8781236	36.31944974	95.2996	26.4462	78.2775258	21.7224742	0.61641	860.562231	9.92757
OPT_acs_sym_7_mc_4_1B_4Br	acs	methane	methanol	0.995789	0.00421093	298	4.00E+06	FALSE	142.9560415	42.83838872	104.0942	31.193	76.94312544	23.05687456	0.61641	860.562231	9.92757
OPT_acs_sym_7_mc_4_1B_4Br	acs	methane	methanol	0.995789	0.00421093	298	4.00E+06	TRUE	31.80283086	217.9598211	23.1574	158.7086	12.73322116	87.26677884	0.61641	860.562231	9.92757
OPT_acs_sym_7_mc_4_1B_4Br	acs	methane	methanol	0.997189	0.00281124	298	6.00E+06	FALSE	174.7577737	17.15677949	127.2508	12.4928	91.06019882	8.939801179	0.61641	860.562231	9.92757
OPT_acs_sym_7_mc_4_1B_4Br	acs	methane	methanol	0.997189	0.00281124	298	6.00E+06	TRUE	63.00002168	174.024139	45.8738	126.7166	26.57957801	73.42042199	0.61641	860.562231	9.92757
OPT_acs_sym_7_mc_4_1B_4Br	acs	methane	methanol	0.99789	0.00210991	298	8.00E+06	FALSE	192.2848039	5.009645573	140.0132	3.6478	97.46082792	2.539172079	0.61641	860.562231	9.92757
OPT_acs_sym_7_mc_4_1B_4Br	acs	methane	methanol	0.99789	0.00210991	298	8.00E+06	TRUE	91.23767904	139.4713453	66.4352	101.5568	39.54664508	60.45335492	0.61641	860.562231	9.92757
OPT_acs_sym_7_mc_4_1B_4Br	acs	methane	methanol	0.998311	0.00168864	298	1.00E+07	FALSE	200.9590523	0.520218692	146.3294	0.3788	99.74180039	0.25819961	0.61641	860.562231	9.92757
OPT_acs_sym_7_mc_4_1B_4Br	acs	methane	methanol	0.998311	0.00168864	298	1.00E+07	TRUE	123.5079926	105.7087677	89.933	76.9724	53.88261854	46.11738146	0.61641	860.562231	9.92757
OPT_acs_sym_7_mc_4_1B_4CN	acs	methane	22-dimethylbutane	0.989153	0.0108468	298	4.00E+06	FALSE	62.06032402	56.93917791	45.243	41.5096	52.15175107	47.84824893	0.581554	1420.169535	9.44355
OPT_acs_sym_7_mc_4_1B_4CN	acs	methane	22-dimethylbutane	0.992743	0.00725744	298	6.00E+06	FALSE	73.45732263	53.58808776	53.5516	39.0666	57.81973737	42.18026263	0.581554	1420.169535	9.44355
OPT_acs_sym_7_mc_4_1B_4CN	acs	methane	22-dimethylbutane	0.994547	0.00545297	298	8.00E+06	FALSE	96.52209562	44.14769782	70.3662	32.1844	68.61607831	31.38392169	0.581554	1420.169535	9.44355
OPT_acs_sym_7_mc_4_1B_4CN	acs	methane	22-dimethylbutane	0.995633	0.00436714	298	1.00E+07	FALSE	115.2917669	36.0156459	84.0496	26.256	76.19703805	23.80296195	0.581554	1420.169535	9.44355
OPT_acs_sym_7_mc_4_1B_4CN	acs	methane	methanol	0.995789	0.00421093	298	4.00E+06	FALSE	133.9816046	32.73341565	97.6748	23.8632	80.36564696	19.63435304	0.581554	1420.169535	9.44355
OPT_acs_sym_7_mc_4_1B_4CN	acs	methane	methanol	0.995789	0.00421093	298	4.00E+06	TRUE	16.27398016	240.1435369	11.864	175.0686	6.346672544	93.65332746	0.581554	1420.169535	9.44355
OPT_acs_sym_7_mc_4_1B_4CN	acs	methane	methanol	0.997189	0.00281124	298	6.00E+06	FALSE	165.7424771	1.864978373	120.829	1.3596	98.8872939	1.112706095	0.581554	1420.169535	9.44355
OPT_acs_sym_7_mc_4_1B_4CN	acs	methane	methanol	0.997189	0.00281124	298	6.00E+06	TRUE	38.3889804	203.530648	27.9862	148.3772	15.86848518	84.13151482	0.581554	1420.169535	9.44355
OPT_acs_sym_7_mc_4_1B_4CN	acs	methane	methanol	0.99789	0.00210991	298	8.00E+06	FALSE	176.3776274	0.67515619	128.5822	0.4922	99.61866954	0.381330457	0.581554	1420.169535	9.44355
OPT_acs_sym_7_mc_4_1B_4CN	acs	methane	methanol	0.99789	0.00210991	298	8.00E+06	TRUE	46.74626727	198.4243164	34.0788	144.6546	19.06683362	80.93316638	0.581554	1420.169535	9.44355
OPT_acs_sym_7_mc_4_1B_4CN	acs	methane	methanol	0.998311	0.00168864	298	1.00E+07	FALSE	183.6048987	0.502594937	133.851	0.3664	99.72701006	0.27298994	0.581554	1420.169535	9.44355
OPT_acs_sym_7_mc_4_1B_4CN	acs	methane	methanol	0.998311	0.00168864	298	1.00E+07	TRUE	65.74830641	169.9977992	47.9316	123.9312	27.88945601	72.11054399	0.581554	1420.169535	9.44355
OPT_acs_sym_7_mc_4_1B_4F	acs	methane	22-dimethylbutane	0.989153	0.0108468	298	4.00E+06	FALSE	34.02865266	82.08920371	25.0158	60.347	29.30527115	70.69472885	0.691931	2155.703544	9.29817
OPT_acs_sym_7_mc_4_1B_4F	acs	methane	22-dimethylbutane	0.992743	0.00725744	298	6.00E+06	FALSE	65.75678895	68.19197367	48.3404	50.1306	49.09100141	50.90899859	0.691931	2155.703544	9.29817
OPT_acs_sym_7_mc_4_1B_4F	acs	methane	22-dimethylbutane	0.994547	0.00545297	298	8.00E+06	FALSE	96.84096566	54.5676171	71.1916	40.1148	63.96002386	36.03997614	0.691931	2155.703544	9.29817
OPT_acs_sym_7_mc_4_1B_4F	acs	methane	22-dimethylbutane	0.995633	0.00436714	298	1.00E+07	FALSE	126.303681	42.94451388	92.8508	31.5702	74.62630906	25.37369094	0.691931	2155.703544	9.29817
OPT_acs_sym_7_mc_4_1B_4F	acs	methane	methanol	0.995789	0.00421093	298	4.00E+06	FALSE	142.3708399	34.41769457	104.6624	25.3018	80.53171566	19.46828434	0.691931	2155.703544	9.29817
OPT_acs_sym_7_mc_4_1B_4F	acs	methane	methanol	0.995789	0.00421093	298	4.00E+06	TRUE	22.48254165	283.987809	16.5278	208.7706	7.335959776	92.66404022	0.691931	2155.703544	9.29817
OPT_acs_sym_7_mc_4_1B_4F	acs	methane	methanol	0.997189	0.00281124	298	6.00E+06	FALSE	182.0939235	1.417146377	133.8644	1.0418	99.22775973	0.772240268	0.691931	2155.703544	9.29817
OPT_acs_sym_7_mc_4_1B_4F	acs	methane	methanol	0.997189	0.00281124	298	6.00E+06	TRUE	58.4498745	224.913291	42.9688	165.3426	20.62719563	79.37280437	0.691931	2155.703544	9.29817
OPT_acs_sym_7_mc_4_1B_4F	acs	methane	methanol	0.99789	0.00210991	298	8.00E+06	FALSE	197.9913187	0.760944215	145.5512	0.5594	99.61713935	0.382860655	0.691931	2155.703544	9.29817
OPT_acs_sym_7_mc_4_1B_4F	acs	methane	methanol	0.99789	0.00210991	298	8.00E+06	TRUE	93.28626522	180.8780995	68.5784	132.9706	34.02567118	65.97432882	0.691931	2155.703544	9.29817
OPT_acs_sym_7_mc_4_1B_4F	acs	methane	methanol	0.998311	0.00168864	298	1.00E+07	FALSE	208.6442656	0.456512118	153.3826	0.3356	99.78167842	0.218321578	0.691931	2155.703544	9.29817
OPT_acs_sym_7_mc_4_1B_4F	acs	methane	methanol	0.998311	0.00168864	298	1.00E+07	TRUE	127.339403	138.7701618	93.6122	102.0154	47.8522458	52.1477542	0.691931	2155.703544	9.29817
OPT_acs_sym_7_mc_4_1B_4H	acs	methane	22-dimethylbutane	0.989153	0.0108468	298	4.00E+06	FALSE	50.17249718	83.20898228	36.9612	61.2986	37.61578998	62.38421002	0.743319	3196.170441	10.84066
OPT_acs_sym_7_mc_4_1B_4H	acs	methane	22-dimethylbutane	0.992743	0.00725744	298	6.00E+06	FALSE	69.98754676	76.22605532	51.5586	56.1544	47.86664562	52.13335438	0.743319	3196.170441	10.84066
OPT_acs_sym_7_mc_4_1B_4H	acs	methane	22-dimethylbutane	0.994547	0.00545297	298	8.00E+06	FALSE	105.1158421	61.0509966	77.437	44.9752	63.25921763	36.74078237	0.743319	3196.170441	10.84066
OPT_acs_sym_7_mc_4_1B_4H	acs	methane	22-dimethylbutane	0.995633	0.00436714	298	1.00E+07	FALSE	143.4259696	45.42716923	105.6594	33.4654	75.94576955	24.05423045	0.743319	3196.170441	10.84066
OPT_acs_sym_7_mc_4_1B_4H	acs	methane	methanol	0.995789	0.00421093	298	4.00E+06	FALSE	151.6064274	30.51626773	111.6858	22.4808	83.2441159	16.7558841	0.743319	3196.170441	10.84066
OPT_acs_sym_7_mc_4_1B_4H	acs	methane	methanol	0.995789	0.00421093	298	4.00E+06	TRUE	62.23060927	240.8717503	45.8442	177.446	20.53121901	79.46878099	0.743319	3196.170441	10.84066
OPT_acs_sym_7_mc_4_1B_4H	acs	methane	methanol	0.997189	0.00281124	298	6.00E+06	FALSE	190.7820567	7.803090344	140.5458	5.7484	96.07065762	3.92934238	0.743319	3196.170441	10.84066
OPT_acs_sym_7_mc_4_1B_4H	acs	methane	methanol	0.997189	0.00281124	298	6.00E+06	TRUE	110.2238772	181.7998967	81.2	133.9288	37.74483007	62.25516993	0.743319	3196.170441	10.84066
OPT_acs_sym_7_mc_4_1B_4H	acs	methane	methanol	0.99789	0.00210991	298	8.00E+06	FALSE	211.8959019	9.415996883	156.1	6.9366	95.74537251	4.254627489	0.743319	3196.170441	10.84066
OPT_acs_sym_7_mc_4_1B_4H	acs	methane	methanol	0.99789	0.00210991	298	8.00E+06	TRUE	186.633458	78.70283471	137.4896	57.979	70.33845845	29.66154155	0.743319	3196.170441	10.84066
OPT_acs_sym_7_mc_4_1B_4H	acs	methane	methanol	0.998311	0.00168864	298	1.00E+07	FALSE	228.8546328	0.473473995	168.5932	0.3488	99.79353861	0.206461389	0.743319	3196.170441	10.84066
OPT_acs_sym_7_mc_4_1B_4H	acs	methane	methanol	0.998311	0.00168864	298	1.00E+07	TRUE	196.5861855	73.75389122	144.8216	54.3332	72.71810672	27.28189328	0.743319	3196.170441	10.84066
OPT_acs_sym_7_mc_4_2B_2Br	acs	methane	22-dimethylbutane	0.989153	0.0108468	298	4.00E+06	FALSE	45.80030316	94.65179299	76.092	157.2532	32.60919873	67.39080127	0.775953	2352.08827	12.88287
OPT_acs_sym_7_mc_4_2B_2Br	acs	methane	22-dimethylbutane	0.992743	0.00725744	298	6.00E+06	FALSE	74.71230129	81.57379968	124.126	135.5256	47.8048277	52.1951723	0.775953	2352.08827	12.88287
OPT_acs_sym_7_mc_4_2B_2Br	acs	methane	22-dimethylbutane	0.994547	0.00545297	298	8.00E+06	FALSE	117.8719183	59.76382196	195.8308	99.2908	66.35596988	33.64403012	0.775953	2352.08827	12.88287
OPT_acs_sym_7_mc_4_2B_2Br	acs	methane	22-dimethylbutane	0.995633	0.00436714	298	1.00E+07	FALSE	164.0122989	36.32062994	272.4878	60.3426	81.86986525	18.13013475	0.775953	2352.08827	12.88287
OPT_acs_sym_7_mc_4_2B_2Br	acs	methane	methanol	0.995789	0.00421093	298	4.00E+06	FALSE	138.2068629	15.2966223	229.615	25.4136	90.035	9.965000004	0.775953	2352.08827	12.88287
OPT_acs_sym_7_mc_4_2B_2Br	acs	methane	methanol	0.995789	0.00421093	298	4.00E+06	TRUE	101.119885	136.9192635	167.9992	227.4758	42.48035906	57.51964094	0.775953	2352.08827	12.88287
OPT_acs_sym_7_mc_4_2B_2Br	acs	methane	methanol	0.997189	0.00281124	298	6.00E+06	FALSE	174.8079814	1.047919989	290.4236	1.741	99.40410303	0.59589697	0.775953	2352.08827	12.88287
OPT_acs_sym_7_mc_4_2B_2Br	acs	methane	methanol	0.997189	0.00281124	298	6.00E+06	TRUE	150.417749	62.7421779	249.902	104.239	70.56567864	29.43432136	0.775953	2352.08827	12.88287
OPT_acs_sym_7_mc_4_2B_2Br	acs	methane	methanol	0.99789	0.00210991	298	8.00E+06	FALSE	196.9681486	0.978098783	327.2402	1.625	99.50587657	0.494123428	0.775953	2352.08827	12.88287
OPT_acs_sym_7_mc_4_2B_2Br	acs	methane	methanol	0.99789	0.00210991	298	8.00E+06	TRUE	173.0136968	55.6568905	287.4426	92.4676	75.66066928	24.33933072	0.775953	2352.08827	12.88287
OPT_acs_sym_7_mc_4_2B_2Br	acs	methane	methanol	0.998311	0.00168864	298	1.00E+07	FALSE	212.7180069	1.307582644	353.4068	2.1724	99.38905313	0.610946872	0.775953	2352.08827	12.88287
OPT_acs_sym_7_mc_4_2B_2Br	acs	methane	methanol	0.998311	0.00168864	298	1.00E+07	TRUE	192.4141207	41.30453981	319.6742	68.6228	82.3272392	17.6727608	0.775953	2352.08827	12.88287
OPT_acs_sym_7_mc_4_2B_2CF3	acs	methane	22-dimethylbutane	0.989153	0.0108468	298	4.00E+06	FALSE	62.9166758	76.17319082	111.7468	135.2918	45.23455039	54.76544961	0.705837	2604.068227	12.82174
OPT_acs_sym_7_mc_4_2B_2CF3	acs	methane	22-dimethylbutane	0.992743	0.00725744	298	6.00E+06	FALSE	99.39385316	57.82723253	176.5342	102.7074	63.21916219	36.78083781	0.705837	2604.068227	12.82174
OPT_acs_sym_7_mc_4_2B_2CF3	acs	methane	22-dimethylbutane	0.994547	0.00545297	298	8.00E+06	FALSE	139.7763114	35.57982192	248.2578	63.1936	79.70996438	20.29003562	0.705837	2604.068227	12.82174
OPT_acs_sym_7_mc_4_2B_2CF3	acs	methane	22-dimethylbutane	0.995633	0.00436714	298	1.00E+07	FALSE	169.5838487	21.24139061	301.1992	37.727	88.86866816	11.13133184	0.705837	2604.068227	12.82174
OPT_acs_sym_7_mc_4_2B_2CF3	acs	methane	methanol	0.995789	0.00421093	298	4.00E+06	FALSE	126.1148661	5.230425703	223.9936	9.2898	96.01780495	3.982195047	0.705837	2604.068227	12.82174
OPT_acs_sym_7_mc_4_2B_2CF3	acs	methane	methanol	0.995789	0.00421093	298	4.00E+06	TRUE	56.03668809	212.6526303	99.5272	377.694	20.8555697	79.1444303	0.705837	2604.068227	12.82174
OPT_acs_sym_7_mc_4_2B_2CF3	acs	methane	methanol	0.997189	0.00281124	298	6.00E+06	FALSE	157.4675797	2.969414321	279.6794	5.274	98.14917106	1.850828943	0.705837	2604.068227	12.82174
OPT_acs_sym_7_mc_4_2B_2CF3	acs	methane	methanol	0.997189	0.00281124	298	6.00E+06	TRUE	88.66590085	163.6888237	157.4802	290.729	35.13542337	64.86457663	0.705837	2604.068227	12.82174
OPT_acs_sym_7_mc_4_2B_2CF3	acs	methane	methanol	0.99789	0.00210991	298	8.00E+06	FALSE	179.4827972	0.509653743	318.7808	0.9052	99.71684716	0.283152844	0.705837	2604.068227	12.82174
OPT_acs_sym_7_mc_4_2B_2CF3	acs	methane	methanol	0.99789	0.00210991	298	8.00E+06	TRUE	111.2420077	140.2958745	197.5778	249.1806	44.22475324	55.77524676	0.705837	2604.068227	12.82174
OPT_acs_sym_7_mc_4_2B_2CF3	acs	methane	methanol	0.998311	0.00168864	298	1.00E+07	FALSE	194.1478979	0.344798887	344.8276	0.6124	99.82271885	0.177281149	0.705837	2604.068227	12.82174
OPT_acs_sym_7_mc_4_2B_2CF3	acs	methane	methanol	0.998311	0.00168864	298	1.00E+07	TRUE	135.7717122	113.2145231	241.1452	201.0812	54.52980645	45.47019355	0.705837	2604.068227	12.82174
OPT_acs_sym_7_mc_4_2B_2CN	acs	methane	22-dimethylbutane	0.989153	0.0108468	298	4.00E+06	FALSE	45.31292115	93.09186765	76.8658	157.9148	32.73941714	67.26058286	0.760655	3805.89615	12.88245
OPT_acs_sym_7_mc_4_2B_2CN	acs	methane	22-dimethylbutane	0.992743	0.00725744	298	6.00E+06	FALSE	82.27689157	73.39514448	139.569	124.5026	52.85271116	47.14728884	0.760655	3805.89615	12.88245
OPT_acs_sym_7_mc_4_2B_2CN	acs	methane	22-dimethylbutane	0.994547	0.00545297	298	8.00E+06	FALSE	124.2721857	49.6094834	210.807	84.1542	71.46940004	28.53059996	0.760655	3805.89615	12.88245
OPT_acs_sym_7_mc_4_2B_2CN	acs	methane	22-dimethylbutane	0.995633	0.00436714	298	1.00E+07	FALSE	162.2330123	29.59478019	275.2012	50.2026	84.57221458	15.42778542	0.760655	3805.89615	12.88245
OPT_acs_sym_7_mc_4_2B_2CN	acs	methane	methanol	0.995789	0.00421093	298	4.00E+06	FALSE	124.7116041	7.728317843	211.5524	13.1098	94.16466143	5.835338566	0.760655	3805.89615	12.88245
OPT_acs_sym_7_mc_4_2B_2CN	acs	methane	methanol	0.995789	0.00421093	298	4.00E+06	TRUE	44.17022093	262.8091419	74.9274	445.8118	14.38866135	85.61133865	0.760655	3805.89615	12.88245
OPT_acs_sym_7_mc_4_2B_2CN	acs	methane	methanol	0.997189	0.00281124	298	6.00E+06	FALSE	157.7254066	3.33601967	267.5548	5.659	97.92872834	2.071271656	0.760655	3805.89615	12.88245
OPT_acs_sym_7_mc_4_2B_2CN	acs	methane	methanol	0.997189	0.00281124	298	6.00E+06	TRUE	78.47327501	206.6685113	133.1168	350.5786	27.52079098	72.47920902	0.760655	3805.89615	12.88245
OPT_acs_sym_7_mc_4_2B_2CN	acs	methane	methanol	0.99789	0.00210991	298	8.00E+06	FALSE	181.1405036	0.754097254	307.2746	1.2792	99.58542076	0.41457924	0.760655	3805.89615	12.88245
OPT_acs_sym_7_mc_4_2B_2CN	acs	methane	methanol	0.99789	0.00210991	298	8.00E+06	TRUE	113.3527489	156.7752393	192.284	265.943	41.96260805	58.03739195	0.760655	3805.89615	12.88245
OPT_acs_sym_7_mc_4_2B_2CN	acs	methane	methanol	0.998311	0.00168864	298	1.00E+07	FALSE	196.8786878	0.424209181	333.9718	0.7196	99.78499597	0.215004031	0.760655	3805.89615	12.88245
OPT_acs_sym_7_mc_4_2B_2CN	acs	methane	methanol	0.998311	0.00168864	298	1.00E+07	TRUE	139.4409062	123.5365989	236.5382	209.5592	53.0238912	46.9761088	0.760655	3805.89615	12.88245
OPT_acs_sym_7_mc_4_2B_2F	acs	methane	22-dimethylbutane	0.989153	0.0108468	298	4.00E+06	FALSE	53.02750663	102.0943674	92.9758	179.0072	34.18441594	65.81558406	0.827805	4235.134511	14.40683
OPT_acs_sym_7_mc_4_2B_2F	acs	methane	22-dimethylbutane	0.992743	0.00725744	298	6.00E+06	FALSE	90.44250365	80.83609526	158.5774	141.734	52.80432245	47.19567755	0.827805	4235.134511	14.40683
OPT_acs_sym_7_mc_4_2B_2F	acs	methane	22-dimethylbutane	0.994547	0.00545297	298	8.00E+06	FALSE	149.0269144	43.44163036	261.2964	76.1684	77.42923114	22.57076886	0.827805	4235.134511	14.40683
OPT_acs_sym_7_mc_4_2B_2F	acs	methane	22-dimethylbutane	0.995633	0.00436714	298	1.00E+07	FALSE	186.2315712	22.857268	326.5292	40.0768	89.06815491	10.93184509	0.827805	4235.134511	14.40683
OPT_acs_sym_7_mc_4_2B_2F	acs	methane	methanol	0.995789	0.00421093	298	4.00E+06	FALSE	122.0210175	3.427152951	213.9456	6.009	97.26807259	2.731927407	0.827805	4235.134511	14.40683
OPT_acs_sym_7_mc_4_2B_2F	acs	methane	methanol	0.995789	0.00421093	298	4.00E+06	TRUE	86.94462895	174.2211938	152.4444	305.4708	33.29096741	66.70903259	0.827805	4235.134511	14.40683
OPT_acs_sym_7_mc_4_2B_2F	acs	methane	methanol	0.997189	0.00281124	298	6.00E+06	FALSE	161.4181626	4.456040274	283.0226	7.813	97.3136026	2.686397401	0.827805	4235.134511	14.40683
OPT_acs_sym_7_mc_4_2B_2F	acs	methane	methanol	0.997189	0.00281124	298	6.00E+06	TRUE	136.3150229	93.62030541	239.008	164.1492	59.28407083	40.71592917	0.827805	4235.134511	14.40683
OPT_acs_sym_7_mc_4_2B_2F	acs	methane	methanol	0.99789	0.00210991	298	8.00E+06	FALSE	189.1595655	0.697521727	331.663	1.223	99.63260696	0.367393041	0.827805	4235.134511	14.40683
OPT_acs_sym_7_mc_4_2B_2F	acs	methane	methanol	0.99789	0.00210991	298	8.00E+06	TRUE	166.3141605	69.96103001	291.607	122.6662	70.39002282	29.60997718	0.827805	4235.134511	14.40683
OPT_acs_sym_7_mc_4_2B_2F	acs	methane	methanol	0.998311	0.00168864	298	1.00E+07	FALSE	210.0432406	0.299768945	368.2794	0.5256	99.85748566	0.142514337	0.827805	4235.134511	14.40683
OPT_acs_sym_7_mc_4_2B_2F	acs	methane	methanol	0.998311	0.00168864	298	1.00E+07	TRUE	191.3262745	52.69614104	335.462	92.3948	78.40520473	21.59479527	0.827805	4235.134511	14.40683
OPT_acs_sym_7_mc_4_2B_2NH2	acs	methane	22-dimethylbutane	0.989153	0.0108468	298	4.00E+06	FALSE	49.71748564	97.92978376	86.5538	170.4872	33.67314942	66.32685058	0.776115	4109.96999	14.83958
OPT_acs_sym_7_mc_4_2B_2NH2	acs	methane	22-dimethylbutane	0.992743	0.00725744	298	6.00E+06	FALSE	100.9135061	68.07739582	175.6816	118.5168	59.71534855	40.28465145	0.776115	4109.96999	14.83958
OPT_acs_sym_7_mc_4_2B_2NH2	acs	methane	22-dimethylbutane	0.994547	0.00545297	298	8.00E+06	FALSE	155.8371116	33.78365927	271.2988	58.8144	82.18356612	17.81643388	0.776115	4109.96999	14.83958
OPT_acs_sym_7_mc_4_2B_2NH2	acs	methane	22-dimethylbutane	0.995633	0.00436714	298	1.00E+07	FALSE	187.6620282	16.70962635	326.7032	29.09	91.8239022	8.176097801	0.776115	4109.96999	14.83958
OPT_acs_sym_7_mc_4_2B_2NH2	acs	methane	methanol	0.995789	0.00421093	298	4.00E+06	FALSE	119.9268666	5.58167003	208.7822	9.7172	95.55275667	4.447243333	0.776115	4109.96999	14.83958
OPT_acs_sym_7_mc_4_2B_2NH2	acs	methane	methanol	0.995789	0.00421093	298	4.00E+06	TRUE	61.77518418	238.1872511	107.5452	414.6632	20.59430679	79.40569321	0.776115	4109.96999	14.83958
OPT_acs_sym_7_mc_4_2B_2NH2	acs	methane	methanol	0.997189	0.00281124	298	6.00E+06	FALSE	157.3000225	1.476352068	273.8456	2.5702	99.07016893	0.929831073	0.776115	4109.96999	14.83958
OPT_acs_sym_7_mc_4_2B_2NH2	acs	methane	methanol	0.997189	0.00281124	298	6.00E+06	TRUE	108.681156	152.2669153	189.2044	265.0834	41.64857608	58.35142392	0.776115	4109.96999	14.83958
OPT_acs_sym_7_mc_4_2B_2NH2	acs	methane	methanol	0.99789	0.00210991	298	8.00E+06	FALSE	182.4974957	0.5877377	317.7122	1.0232	99.67898137	0.321018625	0.776115	4109.96999	14.83958
OPT_acs_sym_7_mc_4_2B_2NH2	acs	methane	methanol	0.99789	0.00210991	298	8.00E+06	TRUE	131.6889731	130.826437	229.259	227.7574	50.16428294	49.83571706	0.776115	4109.96999	14.83958
OPT_acs_sym_7_mc_4_2B_2NH2	acs	methane	methanol	0.998311	0.00168864	298	1.00E+07	FALSE	201.5750754	0.342808697	350.9246	0.5968	99.83022371	0.169776292	0.776115	4109.96999	14.83958
OPT_acs_sym_7_mc_4_2B_2NH2	acs	methane	methanol	0.998311	0.00168864	298	1.00E+07	TRUE	157.0432606	102.4648763	273.3986	178.3824	60.51573661	39.48426339	0.776115	4109.96999	14.83958
OPT_acs_sym_7_mc_4_2B_2OH	acs	methane	22-dimethylbutane	0.989153	0.0108468	298	4.00E+06	FALSE	55.27426849	96.58702363	96.109	167.9422	36.39786526	63.60213474	0.798506	4278.58762	14.30159
OPT_acs_sym_7_mc_4_2B_2OH	acs	methane	22-dimethylbutane	0.992743	0.00725744	298	6.00E+06	FALSE	97.67308143	73.412998	169.8306	127.648	57.09002261	42.90997739	0.798506	4278.58762	14.30159
OPT_acs_sym_7_mc_4_2B_2OH	acs	methane	22-dimethylbutane	0.994547	0.00545297	298	8.00E+06	FALSE	148.1732736	42.21017337	257.6386	73.3936	77.82886378	22.17113622	0.798506	4278.58762	14.30159
OPT_acs_sym_7_mc_4_2B_2OH	acs	methane	22-dimethylbutane	0.995633	0.00436714	298	1.00E+07	FALSE	183.8651448	22.00204482	319.6984	38.2564	89.31250538	10.68749462	0.798506	4278.58762	14.30159
OPT_acs_sym_7_mc_4_2B_2OH	acs	methane	methanol	0.995789	0.00421093	298	4.00E+06	FALSE	121.0544956	3.893911728	210.4854	6.7706	96.88358434	3.116415657	0.798506	4278.58762	14.30159
OPT_acs_sym_7_mc_4_2B_2OH	acs	methane	methanol	0.995789	0.00421093	298	4.00E+06	TRUE	33.4339476	323.4390997	58.1338	562.3848	9.368582988	90.63141701	0.798506	4278.58762	14.30159
OPT_acs_sym_7_mc_4_2B_2OH	acs	methane	methanol	0.997189	0.00281124	298	6.00E+06	FALSE	157.8006779	3.947167898	274.3784	6.8632	97.55967823	2.440321773	0.798506	4278.58762	14.30159
OPT_acs_sym_7_mc_4_2B_2OH	acs	methane	methanol	0.997189	0.00281124	298	6.00E+06	TRUE	75.11121419	252.5792922	130.6008	439.1762	22.92138854	77.07861146	0.798506	4278.58762	14.30159
OPT_acs_sym_7_mc_4_2B_2OH	acs	methane	methanol	0.99789	0.00210991	298	8.00E+06	FALSE	186.0602652	0.706133108	323.5152	1.2278	99.62191641	0.378083592	0.798506	4278.58762	14.30159
OPT_acs_sym_7_mc_4_2B_2OH	acs	methane	methanol	0.99789	0.00210991	298	8.00E+06	TRUE	105.5750088	206.1621114	183.5702	358.4676	33.86667867	66.13332133	0.798506	4278.58762	14.30159
OPT_acs_sym_7_mc_4_2B_2OH	acs	methane	methanol	0.998311	0.00168864	298	1.00E+07	FALSE	205.5987233	0.342541846	357.488	0.5956	99.83367013	0.166329874	0.798506	4278.58762	14.30159
OPT_acs_sym_7_mc_4_2B_2OH	acs	methane	methanol	0.998311	0.00168864	298	1.00E+07	TRUE	136.5997761	162.1120122	237.515	281.8748	45.72962349	54.27037651	0.798506	4278.58762	14.30159
OPT_acs_sym_7_mc_4_2B_2SH	acs	methane	22-dimethylbutane	0.989153	0.0108468	298	4.00E+06	FALSE	39.20070801	97.19141033	65.4458	162.2616	28.74118276	71.25881724	0.753714	3334.917838	13.65459
OPT_acs_sym_7_mc_4_2B_2SH	acs	methane	22-dimethylbutane	0.992743	0.00725744	298	6.00E+06	FALSE	71.50931558	81.34324509	119.3852	135.803	46.78319766	53.21680234	0.753714	3334.917838	13.65459
OPT_acs_sym_7_mc_4_2B_2SH	acs	methane	22-dimethylbutane	0.994547	0.00545297	298	8.00E+06	FALSE	109.9347042	61.34462946	183.5366	102.4152	64.18445346	35.81554654	0.753714	3334.917838	13.65459
OPT_acs_sym_7_mc_4_2B_2SH	acs	methane	22-dimethylbutane	0.995633	0.00436714	298	1.00E+07	FALSE	157.2929172	35.99173397	262.6014	60.0884	81.37889701	18.62110299	0.753714	3334.917838	13.65459
OPT_acs_sym_7_mc_4_2B_2SH	acs	methane	methanol	0.995789	0.00421093	298	4.00E+06	FALSE	133.1047977	7.380268919	222.2192	12.3214	94.74658119	5.253418811	0.753714	3334.917838	13.65459
OPT_acs_sym_7_mc_4_2B_2SH	acs	methane	methanol	0.995789	0.00421093	298	4.00E+06	TRUE	61.76151935	224.0076396	103.1112	373.982	21.61238098	78.38761902	0.753714	3334.917838	13.65459
OPT_acs_sym_7_mc_4_2B_2SH	acs	methane	methanol	0.997189	0.00281124	298	6.00E+06	FALSE	165.1401508	4.978240382	275.7024	8.3112	97.07366126	2.926338739	0.753714	3334.917838	13.65459
OPT_acs_sym_7_mc_4_2B_2SH	acs	methane	methanol	0.997189	0.00281124	298	6.00E+06	TRUE	125.708596	106.9814945	209.8712	178.6062	54.02404361	45.97595639	0.753714	3334.917838	13.65459
OPT_acs_sym_7_mc_4_2B_2SH	acs	methane	methanol	0.99789	0.00210991	298	8.00E+06	FALSE	188.3352817	4.459643726	314.4268	7.4454	97.6868459	2.313154103	0.753714	3334.917838	13.65459
OPT_acs_sym_7_mc_4_2B_2SH	acs	methane	methanol	0.99789	0.00210991	298	8.00E+06	TRUE	153.4315345	79.79787737	256.1548	133.223	65.7856714	34.2143286	0.753714	3334.917838	13.65459
OPT_acs_sym_7_mc_4_2B_2SH	acs	methane	methanol	0.998311	0.00168864	298	1.00E+07	FALSE	204.0295091	0.404550914	340.6284	0.6754	99.80211178	0.197888216	0.753714	3334.917838	13.65459
OPT_acs_sym_7_mc_4_2B_2SH	acs	methane	methanol	0.998311	0.00168864	298	1.00E+07	TRUE	178.2540933	52.98670581	297.5962	88.4616	77.08591822	22.91408178	0.753714	3334.917838	13.65459
OPT_acs_sym_7_mc_4_2B_4Br	acs	methane	22-dimethylbutane	0.989153	0.0108468	298	4.00E+06	FALSE	40.94147583	83.47550002	65.0262	132.5818	32.9066637	67.0933363	0.708082	1319.230916	12.21329
OPT_acs_sym_7_mc_4_2B_4Br	acs	methane	22-dimethylbutane	0.992743	0.00725744	298	6.00E+06	FALSE	59.88331945	77.01199758	95.111	122.316	43.74387726	56.25612274	0.708082	1319.230916	12.21329
OPT_acs_sym_7_mc_4_2B_4Br	acs	methane	22-dimethylbutane	0.994547	0.00545297	298	8.00E+06	FALSE	87.86782071	65.76858341	139.558	104.4584	57.19205758	42.80794242	0.708082	1319.230916	12.21329
OPT_acs_sym_7_mc_4_2B_4Br	acs	methane	22-dimethylbutane	0.995633	0.00436714	298	1.00E+07	FALSE	128.3447665	47.89393734	203.8464	76.0686	72.82439312	27.17560688	0.708082	1319.230916	12.21329
OPT_acs_sym_7_mc_4_2B_4Br	acs	methane	methanol	0.995789	0.00421093	298	4.00E+06	FALSE	143.1827791	44.68000422	227.4132	70.964	76.21668144	23.78331856	0.708082	1319.230916	12.21329
OPT_acs_sym_7_mc_4_2B_4Br	acs	methane	methanol	0.995789	0.00421093	298	4.00E+06	TRUE	80.94885472	180.458636	128.5688	286.6174	30.96653983	69.03346017	0.708082	1319.230916	12.21329
OPT_acs_sym_7_mc_4_2B_4Br	acs	methane	methanol	0.997189	0.00281124	298	6.00E+06	FALSE	184.1287882	5.246582425	292.4466	8.333	97.22953285	2.770467146	0.708082	1319.230916	12.21329
OPT_acs_sym_7_mc_4_2B_4Br	acs	methane	methanol	0.997189	0.00281124	298	6.00E+06	TRUE	151.0077612	74.10103524	239.8414	117.6926	67.08212366	32.91787634	0.708082	1319.230916	12.21329
OPT_acs_sym_7_mc_4_2B_4Br	acs	methane	methanol	0.99789	0.00210991	298	8.00E+06	FALSE	202.1546678	3.854251646	321.0766	6.1216	98.12908506	1.870914938	0.708082	1319.230916	12.21329
OPT_acs_sym_7_mc_4_2B_4Br	acs	methane	methanol	0.99789	0.00210991	298	8.00E+06	TRUE	176.3267241	52.21964475	280.0548	82.939	77.15140038	22.84859962	0.708082	1319.230916	12.21329
OPT_acs_sym_7_mc_4_2B_4Br	acs	methane	methanol	0.998311	0.00168864	298	1.00E+07	FALSE	214.1594125	3.091913713	340.1434	4.9108	98.5768033	1.423196704	0.708082	1319.230916	12.21329
OPT_acs_sym_7_mc_4_2B_4Br	acs	methane	methanol	0.998311	0.00168864	298	1.00E+07	TRUE	192.8351054	40.18115266	306.2746	63.8186	82.75607334	17.24392666	0.708082	1319.230916	12.21329
OPT_acs_sym_7_mc_4_2B_4F	acs	methane	22-dimethylbutane	0.989153	0.0108468	298	4.00E+06	FALSE	57.55330651	89.68872376	99.4822	155.029	39.08755292	60.91244708	0.789942	3243.743292	13.97229
OPT_acs_sym_7_mc_4_2B_4F	acs	methane	22-dimethylbutane	0.992743	0.00725744	298	6.00E+06	FALSE	98.99042369	66.79854204	171.1072	115.4628	59.70869247	40.29130753	0.789942	3243.743292	13.97229
OPT_acs_sym_7_mc_4_2B_4F	acs	methane	22-dimethylbutane	0.994547	0.00545297	298	8.00E+06	FALSE	142.6096354	40.14491551	246.504	69.3914	78.03342499	21.96657501	0.789942	3243.743292	13.97229
OPT_acs_sym_7_mc_4_2B_4F	acs	methane	22-dimethylbutane	0.995633	0.00436714	298	1.00E+07	FALSE	174.9956712	22.56539572	302.484	39.0048	88.57801486	11.42198514	0.789942	3243.743292	13.97229
OPT_acs_sym_7_mc_4_2B_4F	acs	methane	methanol	0.995789	0.00421093	298	4.00E+06	FALSE	111.6543009	7.424374341	192.997	12.8332	93.76515205	6.234847947	0.789942	3243.743292	13.97229
OPT_acs_sym_7_mc_4_2B_4F	acs	methane	methanol	0.995789	0.00421093	298	4.00E+06	TRUE	98.09578693	105.0380155	169.5608	181.5606	48.2912178	51.7087822	0.789942	3243.743292	13.97229
OPT_acs_sym_7_mc_4_2B_4F	acs	methane	methanol	0.997189	0.00281124	298	6.00E+06	FALSE	148.6088621	2.720126179	256.8738	4.7018	98.20250819	1.797491815	0.789942	3243.743292	13.97229
OPT_acs_sym_7_mc_4_2B_4F	acs	methane	methanol	0.997189	0.00281124	298	6.00E+06	TRUE	135.2708833	73.69101711	233.8188	127.3766	64.73471146	35.26528854	0.789942	3243.743292	13.97229
OPT_acs_sym_7_mc_4_2B_4F	acs	methane	methanol	0.99789	0.00210991	298	8.00E+06	FALSE	175.955566	0.49429491	304.1432	0.8544	99.71986665	0.280133352	0.789942	3243.743292	13.97229
OPT_acs_sym_7_mc_4_2B_4F	acs	methane	methanol	0.99789	0.00210991	298	8.00E+06	TRUE	165.2046518	46.42449728	285.56	80.2458	78.06327838	21.93672162	0.789942	3243.743292	13.97229
OPT_acs_sym_7_mc_4_2B_4F	acs	methane	methanol	0.998311	0.00168864	298	1.00E+07	FALSE	195.1140063	0.348505681	337.259	0.6024	99.82170204	0.178297965	0.789942	3243.743292	13.97229
OPT_acs_sym_7_mc_4_2B_4F	acs	methane	methanol	0.998311	0.00168864	298	1.00E+07	TRUE	182.2808516	44.04500879	315.0766	76.1328	80.53911793	19.46088207	0.789942	3243.743292	13.97229
OPT_acs_sym_7_mc_4_2B_4H	acs	methane	22-dimethylbutane	0.989153	0.0108468	298	4.00E+06	FALSE	43.15593513	111.1799977	76.057	195.941	27.96233796	72.03766204	0.845954	5164.832689	15.24695
OPT_acs_sym_7_mc_4_2B_4H	acs	methane	22-dimethylbutane	0.992743	0.00725744	298	6.00E+06	FALSE	96.02579991	79.64394153	169.2336	140.3626	54.66268643	45.33731357	0.845954	5164.832689	15.24695
OPT_acs_sym_7_mc_4_2B_4H	acs	methane	22-dimethylbutane	0.994547	0.00545297	298	8.00E+06	FALSE	159.1757617	36.76308952	280.5276	64.7904	81.23746807	18.76253193	0.845954	5164.832689	15.24695
OPT_acs_sym_7_mc_4_2B_4H	acs	methane	22-dimethylbutane	0.995633	0.00436714	298	1.00E+07	FALSE	193.1395627	19.12735594	340.3846	33.7096	90.98900758	9.010992418	0.845954	5164.832689	15.24695
OPT_acs_sym_7_mc_4_2B_4H	acs	methane	methanol	0.995789	0.00421093	298	4.00E+06	FALSE	119.782814	5.657588362	211.1024	9.9708	95.48981966	4.510180338	0.845954	5164.832689	15.24695
OPT_acs_sym_7_mc_4_2B_4H	acs	methane	methanol	0.995789	0.00421093	298	4.00E+06	TRUE	119.7484286	57.73363859	211.0418	101.7484	67.47071999	32.52928001	0.845954	5164.832689	15.24695
OPT_acs_sym_7_mc_4_2B_4H	acs	methane	methanol	0.997189	0.00281124	298	6.00E+06	FALSE	159.1955078	1.599431347	280.5624	2.8188	99.00529746	0.994702542	0.845954	5164.832689	15.24695
OPT_acs_sym_7_mc_4_2B_4H	acs	methane	methanol	0.997189	0.00281124	298	6.00E+06	TRUE	159.3034302	33.34997066	280.7526	58.7752	82.68913473	17.31086527	0.845954	5164.832689	15.24695
OPT_acs_sym_7_mc_4_2B_4H	acs	methane	methanol	0.99789	0.00210991	298	8.00E+06	FALSE	188.7398214	3.796578382	332.6306	6.691	98.02812435	1.971875648	0.845954	5164.832689	15.24695
OPT_acs_sym_7_mc_4_2B_4H	acs	methane	methanol	0.99789	0.00210991	298	8.00E+06	TRUE	186.7317373	26.74820259	329.0916	47.1404	87.47039061	12.52960939	0.845954	5164.832689	15.24695
OPT_acs_sym_7_mc_4_2B_4H	acs	methane	methanol	0.998311	0.00168864	298	1.00E+07	FALSE	211.1999502	0.322632561	372.2138	0.5686	99.84747134	0.15252866	0.845954	5164.832689	15.24695
OPT_acs_sym_7_mc_4_2B_4H	acs	methane	methanol	0.998311	0.00168864	298	1.00E+07	TRUE	207.5406864	23.00462084	365.7648	40.5428	90.02164862	9.978351377	0.845954	5164.832689	15.24695
OPT_acs_sym_7_mc_4_ntn_edge	acs	methane	22-dimethylbutane	0.989153	0.0108468	298	4.00E+06	FALSE	80.12630595	49.36018876	56.3502	34.7134	61.88004867	38.11995133	0.498245	408.833468	5.61332
OPT_acs_sym_7_mc_4_ntn_edge	acs	methane	22-dimethylbutane	0.992743	0.00725744	298	6.00E+06	FALSE	82.52027525	48.34634931	58.0338	34.0004	63.05677672	36.94322328	0.498245	408.833468	5.61332
OPT_acs_sym_7_mc_4_ntn_edge	acs	methane	22-dimethylbutane	0.994547	0.00545297	298	8.00E+06	FALSE	83.08791159	48.18908333	58.433	33.8898	63.29205787	36.70794213	0.498245	408.833468	5.61332
OPT_acs_sym_7_mc_4_ntn_edge	acs	methane	22-dimethylbutane	0.995633	0.00436714	298	1.00E+07	FALSE	91.5043432	43.51034932	64.352	30.5994	67.77361893	32.22638107	0.498245	408.833468	5.61332
OPT_acs_sym_7_mc_4_ntn_edge	acs	methane	methanol	0.995789	0.00421093	298	4.00E+06	FALSE	146.1296719	3.710112076	102.7682	2.6092	97.52394726	2.47605274	0.498245	408.833468	5.61332
OPT_acs_sym_7_mc_4_ntn_edge	acs	methane	methanol	0.995789	0.00421093	298	4.00E+06	TRUE	11.51937757	222.3840496	8.1012	156.3954	4.924843431	95.07515657	0.498245	408.833468	5.61332
OPT_acs_sym_7_mc_4_ntn_edge	acs	methane	methanol	0.997189	0.00281124	298	6.00E+06	FALSE	153.0294679	1.277181767	107.6206	0.8982	99.17230931	0.827690686	0.498245	408.833468	5.61332
OPT_acs_sym_7_mc_4_ntn_edge	acs	methane	methanol	0.997189	0.00281124	298	6.00E+06	TRUE	14.46249805	230.2115158	10.171	161.9002	5.910925245	94.08907476	0.498245	408.833468	5.61332
OPT_acs_sym_7_mc_4_ntn_edge	acs	methane	methanol	0.99789	0.00210991	298	8.00E+06	FALSE	156.1964009	0.92226686	109.8478	0.6486	99.41301255	0.586987449	0.498245	408.833468	5.61332
OPT_acs_sym_7_mc_4_ntn_edge	acs	methane	methanol	0.99789	0.00210991	298	8.00E+06	TRUE	30.03353642	207.1778796	21.1216	145.7014	12.6610839	87.3389161	0.498245	408.833468	5.61332
OPT_acs_sym_7_mc_4_ntn_edge	acs	methane	methanol	0.998311	0.00168864	298	1.00E+07	FALSE	159.9653811	0.462981945	112.4984	0.3256	99.71140892	0.28859108	0.498245	408.833468	5.61332
OPT_acs_sym_7_mc_4_ntn_edge	acs	methane	methanol	0.998311	0.00168864	298	1.00E+07	TRUE	34.03400756	194.8943544	23.935	137.0628	14.86666277	85.13333723	0.498245	408.833468	5.61332
OPT_act_sym_6_mc_3_sym_3_on_2_ntn_edge_1B_2Br	act	methane	22-dimethylbutane	0.989153	0.0108468	298	4.00E+06	FALSE	54.20476335	33.92385174	30.1304	18.857	61.50642818	38.49357182	0.454535	367.874352	7.32119
OPT_act_sym_6_mc_3_sym_3_on_2_ntn_edge_1B_2Br	act	methane	22-dimethylbutane	0.992743	0.00725744	298	6.00E+06	FALSE	59.62912554	33.92457135	33.1456	18.8574	63.73786128	36.26213872	0.454535	367.874352	7.32119
OPT_act_sym_6_mc_3_sym_3_on_2_ntn_edge_1B_2Br	act	methane	22-dimethylbutane	0.994547	0.00545297	298	8.00E+06	FALSE	62.94505297	33.28052728	34.9888	18.4994	65.41405394	34.58594606	0.454535	367.874352	7.32119
OPT_act_sym_6_mc_3_sym_3_on_2_ntn_edge_1B_2Br	act	methane	22-dimethylbutane	0.995633	0.00436714	298	1.00E+07	FALSE	77.25398504	27.67338611	42.9426	15.3826	73.6261513	26.3738487	0.454535	367.874352	7.32119
OPT_act_sym_6_mc_3_sym_3_on_2_ntn_edge_1B_2Br	act	methane	methanol	0.995789	0.00421093	298	4.00E+06	FALSE	96.43786293	41.20730649	53.6062	22.9056	70.062657	29.937343	0.454535	367.874352	7.32119
OPT_act_sym_6_mc_3_sym_3_on_2_ntn_edge_1B_2Br	act	methane	methanol	0.995789	0.00421093	298	4.00E+06	TRUE	29.00680918	135.6569083	16.1238	75.4066	17.61578667	82.38421333	0.454535	367.874352	7.32119
OPT_act_sym_6_mc_3_sym_3_on_2_ntn_edge_1B_2Br	act	methane	methanol	0.997189	0.00281124	298	6.00E+06	FALSE	134.0971703	2.51429046	74.5396	1.3976	98.15953182	1.840468176	0.454535	367.874352	7.32119
OPT_act_sym_6_mc_3_sym_3_on_2_ntn_edge_1B_2Br	act	methane	methanol	0.997189	0.00281124	298	6.00E+06	TRUE	55.23775247	103.816665	30.7046	57.7078	34.72883894	65.27116106	0.454535	367.874352	7.32119
OPT_act_sym_6_mc_3_sym_3_on_2_ntn_edge_1B_2Br	act	methane	methanol	0.99789	0.00210991	298	8.00E+06	FALSE	142.5647306	0.87971382	79.2464	0.489	99.38672158	0.613278418	0.454535	367.874352	7.32119
OPT_act_sym_6_mc_3_sym_3_on_2_ntn_edge_1B_2Br	act	methane	methanol	0.99789	0.00210991	298	8.00E+06	TRUE	71.79292313	89.59336559	39.907	49.8016	44.48514412	55.51485588	0.454535	367.874352	7.32119
OPT_act_sym_6_mc_3_sym_3_on_2_ntn_edge_1B_2Br	act	methane	methanol	0.998311	0.00168864	298	1.00E+07	FALSE	146.9366744	0.454069056	81.6766	0.2524	99.69192838	0.308071623	0.454535	367.874352	7.32119
OPT_act_sym_6_mc_3_sym_3_on_2_ntn_edge_1B_2Br	act	methane	methanol	0.998311	0.00168864	298	1.00E+07	TRUE	104.185821	50.89675155	57.913	28.2916	67.1808697	32.8191303	0.454535	367.874352	7.32119
OPT_act_sym_6_mc_3_sym_3_on_2_ntn_edge_1B_2CF3	act	methane	22-dimethylbutane	0.989153	0.0108468	298	4.00E+06	FALSE	39.17762927	29.72847335	21.793	16.5368	56.85654504	43.14345496	0.368553	254.521865	6.64846
OPT_act_sym_6_mc_3_sym_3_on_2_ntn_edge_1B_2CF3	act	methane	22-dimethylbutane	0.992743	0.00725744	298	6.00E+06	FALSE	45.793944	28.34315324	25.4734	15.7662	61.76927031	38.23072969	0.368553	254.521865	6.64846
OPT_act_sym_6_mc_3_sym_3_on_2_ntn_edge_1B_2CF3	act	methane	22-dimethylbutane	0.994547	0.00545297	298	8.00E+06	FALSE	57.89257406	24.20876551	32.2034	13.4664	70.513556	29.486444	0.368553	254.521865	6.64846
OPT_act_sym_6_mc_3_sym_3_on_2_ntn_edge_1B_2CF3	act	methane	22-dimethylbutane	0.995633	0.00436714	298	1.00E+07	FALSE	57.50354828	26.45087717	31.987	14.7136	68.49376668	31.50623332	0.368553	254.521865	6.64846
OPT_act_sym_6_mc_3_sym_3_on_2_ntn_edge_1B_2CF3	act	methane	methanol	0.995789	0.00421093	298	4.00E+06	FALSE	92.28612097	9.794317433	51.3352	5.4482	90.40529451	9.594705495	0.368553	254.521865	6.64846
OPT_act_sym_6_mc_3_sym_3_on_2_ntn_edge_1B_2CF3	act	methane	methanol	0.995789	0.00421093	298	4.00E+06	TRUE	20.96280913	106.6969736	11.6608	59.3514	16.42084036	83.57915964	0.368553	254.521865	6.64846
OPT_act_sym_6_mc_3_sym_3_on_2_ntn_edge_1B_2CF3	act	methane	methanol	0.997189	0.00281124	298	6.00E+06	FALSE	99.00095054	4.996212879	55.0704	2.7792	95.19581812	4.804181879	0.368553	254.521865	6.64846
OPT_act_sym_6_mc_3_sym_3_on_2_ntn_edge_1B_2CF3	act	methane	methanol	0.997189	0.00281124	298	6.00E+06	TRUE	48.334117	75.14957101	26.8864	41.8028	39.14210676	60.85789324	0.368553	254.521865	6.64846
OPT_act_sym_6_mc_3_sym_3_on_2_ntn_edge_1B_2CF3	act	methane	methanol	0.99789	0.00210991	298	8.00E+06	FALSE	109.5229835	0.524573589	60.9234	0.2918	99.52332101	0.476678995	0.368553	254.521865	6.64846
OPT_act_sym_6_mc_3_sym_3_on_2_ntn_edge_1B_2CF3	act	methane	methanol	0.99789	0.00210991	298	8.00E+06	TRUE	59.48499108	61.09035165	33.0892	33.9822	49.33429152	50.66570848	0.368553	254.521865	6.64846
OPT_act_sym_6_mc_3_sym_3_on_2_ntn_edge_1B_2CF3	act	methane	methanol	0.998311	0.00168864	298	1.00E+07	FALSE	112.5435063	0.444754989	62.6036	0.2474	99.60637062	0.393629377	0.368553	254.521865	6.64846
OPT_act_sym_6_mc_3_sym_3_on_2_ntn_edge_1B_2CF3	act	methane	methanol	0.998311	0.00168864	298	1.00E+07	TRUE	86.2389632	33.65288783	47.9714	18.7198	71.93062953	28.06937047	0.368553	254.521865	6.64846
OPT_act_sym_6_mc_3_sym_3_on_2_ntn_edge_1B_2CH3	act	methane	22-dimethylbutane	0.989153	0.0108468	298	4.00E+06	FALSE	38.29092008	36.17547982	21.1054	19.9394	51.42039917	48.57960083	0.424843	426.567866	6.83419
OPT_act_sym_6_mc_3_sym_3_on_2_ntn_edge_1B_2CH3	act	methane	22-dimethylbutane	0.992743	0.00725744	298	6.00E+06	FALSE	49.83694221	31.63835032	27.4694	17.4386	61.16816603	38.83183397	0.424843	426.567866	6.83419
OPT_act_sym_6_mc_3_sym_3_on_2_ntn_edge_1B_2CH3	act	methane	22-dimethylbutane	0.994547	0.00545297	298	8.00E+06	FALSE	62.66456553	28.22788326	34.5398	15.5588	68.94364314	31.05635686	0.424843	426.567866	6.83419
OPT_act_sym_6_mc_3_sym_3_on_2_ntn_edge_1B_2CH3	act	methane	22-dimethylbutane	0.995633	0.00436714	298	1.00E+07	FALSE	72.58246066	23.27782563	40.0064	12.8304	75.71692457	24.28307543	0.424843	426.567866	6.83419
OPT_act_sym_6_mc_3_sym_3_on_2_ntn_edge_1B_2CH3	act	methane	methanol	0.995789	0.00421093	298	4.00E+06	FALSE	109.8962143	7.020866818	60.5732	3.8698	93.99500334	6.004996664	0.424843	426.567866	6.83419
OPT_act_sym_6_mc_3_sym_3_on_2_ntn_edge_1B_2CH3	act	methane	methanol	0.995789	0.00421093	298	4.00E+06	TRUE	28.94198042	123.6741529	15.9524	68.1674	18.96390624	81.03609376	0.424843	426.567866	6.83419
OPT_act_sym_6_mc_3_sym_3_on_2_ntn_edge_1B_2CH3	act	methane	methanol	0.997189	0.00281124	298	6.00E+06	FALSE	123.2024423	1.530882066	67.9074	0.8438	98.77267597	1.227324032	0.424843	426.567866	6.83419
OPT_act_sym_6_mc_3_sym_3_on_2_ntn_edge_1B_2CH3	act	methane	methanol	0.997189	0.00281124	298	6.00E+06	TRUE	53.25031211	90.89970588	29.3508	50.1026	36.94089869	63.05910131	0.424843	426.567866	6.83419
OPT_act_sym_6_mc_3_sym_3_on_2_ntn_edge_1B_2CH3	act	methane	methanol	0.99789	0.00210991	298	8.00E+06	FALSE	128.1695541	0.768525294	70.6452	0.4236	99.40395785	0.596042145	0.424843	426.567866	6.83419
OPT_act_sym_6_mc_3_sym_3_on_2_ntn_edge_1B_2CH3	act	methane	methanol	0.99789	0.00210991	298	8.00E+06	TRUE	92.62689209	50.40952621	51.0546	27.785	64.75755838	35.24244162	0.424843	426.567866	6.83419
OPT_act_sym_6_mc_3_sym_3_on_2_ntn_edge_1B_2CH3	act	methane	methanol	0.998311	0.00168864	298	1.00E+07	FALSE	130.7316679	0.379545542	72.0574	0.2092	99.71051634	0.289483662	0.424843	426.567866	6.83419
OPT_act_sym_6_mc_3_sym_3_on_2_ntn_edge_1B_2CH3	act	methane	methanol	0.998311	0.00168864	298	1.00E+07	TRUE	107.1998443	35.08401425	59.087	19.3378	75.34223868	24.65776132	0.424843	426.567866	6.83419
OPT_act_sym_6_mc_3_sym_3_on_2_ntn_edge_1B_2CN	act	methane	22-dimethylbutane	0.989153	0.0108468	298	4.00E+06	FALSE	52.83378196	33.07565172	29.3774	18.3912	61.499395	38.500605	0.437673	374.450207	6.58496
OPT_act_sym_6_mc_3_sym_3_on_2_ntn_edge_1B_2CN	act	methane	22-dimethylbutane	0.992743	0.00725744	298	6.00E+06	FALSE	53.36252622	33.50224403	29.6714	18.6284	61.43172435	38.56827565	0.437673	374.450207	6.58496
OPT_act_sym_6_mc_3_sym_3_on_2_ntn_edge_1B_2CN	act	methane	22-dimethylbutane	0.994547	0.00545297	298	8.00E+06	FALSE	67.70516414	28.78958592	37.6464	16.008	70.16460905	29.83539095	0.437673	374.450207	6.58496
OPT_act_sym_6_mc_3_sym_3_on_2_ntn_edge_1B_2CN	act	methane	22-dimethylbutane	0.995633	0.00436714	298	1.00E+07	FALSE	69.8924389	28.14286334	38.8626	15.6484	71.2931335	28.7068665	0.437673	374.450207	6.58496
OPT_act_sym_6_mc_3_sym_3_on_2_ntn_edge_1B_2CN	act	methane	methanol	0.995789	0.00421093	298	4.00E+06	FALSE	100.06827	23.13777728	55.6414	12.8654	81.22025843	18.77974157	0.437673	374.450207	6.58496
OPT_act_sym_6_mc_3_sym_3_on_2_ntn_edge_1B_2CN	act	methane	methanol	0.995789	0.00421093	298	4.00E+06	TRUE	12.08666237	155.2846384	6.7206	86.3436	7.221466472	92.77853353	0.437673	374.450207	6.58496
OPT_act_sym_6_mc_3_sym_3_on_2_ntn_edge_1B_2CN	act	methane	methanol	0.997189	0.00281124	298	6.00E+06	FALSE	123.6423512	2.219646861	68.7494	1.2342	98.23644397	1.763556033	0.437673	374.450207	6.58496
OPT_act_sym_6_mc_3_sym_3_on_2_ntn_edge_1B_2CN	act	methane	methanol	0.997189	0.00281124	298	6.00E+06	TRUE	20.14695511	147.3362092	11.2024	81.924	12.02924198	87.97075802	0.437673	374.450207	6.58496
OPT_act_sym_6_mc_3_sym_3_on_2_ntn_edge_1B_2CN	act	methane	methanol	0.99789	0.00210991	298	8.00E+06	FALSE	129.2851676	0.964328834	71.887	0.5362	99.25962951	0.740370489	0.437673	374.450207	6.58496
OPT_act_sym_6_mc_3_sym_3_on_2_ntn_edge_1B_2CN	act	methane	methanol	0.99789	0.00210991	298	8.00E+06	TRUE	34.16407359	127.7104449	18.9964	71.0114	21.10528199	78.89471801	0.437673	374.450207	6.58496
OPT_act_sym_6_mc_3_sym_3_on_2_ntn_edge_1B_2CN	act	methane	methanol	0.998311	0.00168864	298	1.00E+07	FALSE	133.9539436	0.356452769	74.483	0.1982	99.73460523	0.265394771	0.437673	374.450207	6.58496
OPT_act_sym_6_mc_3_sym_3_on_2_ntn_edge_1B_2CN	act	methane	methanol	0.998311	0.00168864	298	1.00E+07	TRUE	50.71700643	110.3165569	28.2004	61.3398	31.4946806	68.5053194	0.437673	374.450207	6.58496
OPT_act_sym_6_mc_3_sym_3_on_2_ntn_edge_1B_2F	act	methane	22-dimethylbutane	0.989153	0.0108468	298	4.00E+06	FALSE	64.18907604	32.90567073	34.4396	17.655	66.10973114	33.89026886	0.467462	456.711399	6.49871
OPT_act_sym_6_mc_3_sym_3_on_2_ntn_edge_1B_2F	act	methane	22-dimethylbutane	0.992743	0.00725744	298	6.00E+06	FALSE	67.76909374	32.86317572	36.3604	17.6322	67.3433026	32.6566974	0.467462	456.711399	6.49871
OPT_act_sym_6_mc_3_sym_3_on_2_ntn_edge_1B_2F	act	methane	22-dimethylbutane	0.994547	0.00545297	298	8.00E+06	FALSE	71.67229711	32.66412018	38.4546	17.5254	68.69346195	31.30653805	0.467462	456.711399	6.49871
OPT_act_sym_6_mc_3_sym_3_on_2_ntn_edge_1B_2F	act	methane	22-dimethylbutane	0.995633	0.00436714	298	1.00E+07	FALSE	78.19416191	30.27880852	41.9538	16.2456	72.08631017	27.91368983	0.467462	456.711399	6.49871
OPT_act_sym_6_mc_3_sym_3_on_2_ntn_edge_1B_2F	act	methane	methanol	0.995789	0.00421093	298	4.00E+06	FALSE	117.3551718	16.30727134	62.965	8.7494	87.79966088	12.20033912	0.467462	456.711399	6.49871
OPT_act_sym_6_mc_3_sym_3_on_2_ntn_edge_1B_2F	act	methane	methanol	0.995789	0.00421093	298	4.00E+06	TRUE	29.51688055	142.6236702	15.8368	76.5224	17.14696533	82.85303467	0.467462	456.711399	6.49871
OPT_act_sym_6_mc_3_sym_3_on_2_ntn_edge_1B_2F	act	methane	methanol	0.997189	0.00281124	298	6.00E+06	FALSE	135.1956181	3.319083457	72.537	1.7808	97.6038042	2.396195797	0.467462	456.711399	6.49871
OPT_act_sym_6_mc_3_sym_3_on_2_ntn_edge_1B_2F	act	methane	methanol	0.997189	0.00281124	298	6.00E+06	TRUE	50.65292627	113.7449602	27.177	61.028	30.8111785	69.1888215	0.467462	456.711399	6.49871
OPT_act_sym_6_mc_3_sym_3_on_2_ntn_edge_1B_2F	act	methane	methanol	0.99789	0.00210991	298	8.00E+06	FALSE	140.4750632	0.9296714	75.3696	0.4988	99.34254578	0.657454223	0.467462	456.711399	6.49871
OPT_act_sym_6_mc_3_sym_3_on_2_ntn_edge_1B_2F	act	methane	methanol	0.99789	0.00210991	298	8.00E+06	TRUE	85.29791005	75.73317932	45.7652	40.6334	52.96983979	47.03016021	0.467462	456.711399	6.49871
OPT_act_sym_6_mc_3_sym_3_on_2_ntn_edge_1B_2F	act	methane	methanol	0.998311	0.00168864	298	1.00E+07	FALSE	146.0475001	0.466699516	78.3594	0.2504	99.68146465	0.318535348	0.467462	456.711399	6.49871
OPT_act_sym_6_mc_3_sym_3_on_2_ntn_edge_1B_2F	act	methane	methanol	0.998311	0.00168864	298	1.00E+07	TRUE	111.9262486	42.61354252	60.0522	22.8636	72.42552083	27.57447917	0.467462	456.711399	6.49871
OPT_act_sym_6_mc_3_sym_3_on_2_ntn_edge_1B_2NH2	act	methane	22-dimethylbutane	0.989153	0.0108468	298	4.00E+06	FALSE	51.53744147	33.14672216	27.675	17.7994	60.85841704	39.14158296	0.427081	371.293009	6.53065
OPT_act_sym_6_mc_3_sym_3_on_2_ntn_edge_1B_2NH2	act	methane	22-dimethylbutane	0.992743	0.00725744	298	6.00E+06	FALSE	62.51868754	29.87998395	33.5718	16.0452	67.66189008	32.33810992	0.427081	371.293009	6.53065
OPT_act_sym_6_mc_3_sym_3_on_2_ntn_edge_1B_2NH2	act	methane	22-dimethylbutane	0.994547	0.00545297	298	8.00E+06	FALSE	70.05628277	27.09519299	37.6194	14.5498	72.11036397	27.88963603	0.427081	371.293009	6.53065
OPT_act_sym_6_mc_3_sym_3_on_2_ntn_edge_1B_2NH2	act	methane	22-dimethylbutane	0.995633	0.00436714	298	1.00E+07	FALSE	82.22265721	22.70850474	44.1526	12.1942	78.35866456	21.64133544	0.427081	371.293009	6.53065
OPT_act_sym_6_mc_3_sym_3_on_2_ntn_edge_1B_2NH2	act	methane	methanol	0.995789	0.00421093	298	4.00E+06	FALSE	112.5432467	5.902177669	60.4344	3.1694	95.0169644	4.983035605	0.427081	371.293009	6.53065
OPT_act_sym_6_mc_3_sym_3_on_2_ntn_edge_1B_2NH2	act	methane	methanol	0.995789	0.00421093	298	4.00E+06	TRUE	23.8724036	127.56257	12.8192	68.4996	15.76412834	84.23587166	0.427081	371.293009	6.53065
OPT_act_sym_6_mc_3_sym_3_on_2_ntn_edge_1B_2NH2	act	methane	methanol	0.997189	0.00281124	298	6.00E+06	FALSE	125.1077677	1.39369905	67.1814	0.7484	98.8982744	1.101725605	0.427081	371.293009	6.53065
OPT_act_sym_6_mc_3_sym_3_on_2_ntn_edge_1B_2NH2	act	methane	methanol	0.997189	0.00281124	298	6.00E+06	TRUE	37.62652231	115.9455559	20.205	62.2614	24.50088763	75.49911237	0.427081	371.293009	6.53065
OPT_act_sym_6_mc_3_sym_3_on_2_ntn_edge_1B_2NH2	act	methane	methanol	0.99789	0.00210991	298	8.00E+06	FALSE	131.1924447	0.712864773	70.4488	0.3828	99.45956325	0.540436754	0.427081	371.293009	6.53065
OPT_act_sym_6_mc_3_sym_3_on_2_ntn_edge_1B_2NH2	act	methane	methanol	0.99789	0.00210991	298	8.00E+06	TRUE	54.21087059	96.64792656	29.1106	51.8988	35.93484213	64.06515787	0.427081	371.293009	6.53065
OPT_act_sym_6_mc_3_sym_3_on_2_ntn_edge_1B_2NH2	act	methane	methanol	0.998311	0.00168864	298	1.00E+07	FALSE	135.2223281	0.47710542	72.6128	0.2562	99.64841016	0.351589839	0.427081	371.293009	6.53065
OPT_act_sym_6_mc_3_sym_3_on_2_ntn_edge_1B_2NH2	act	methane	methanol	0.998311	0.00168864	298	1.00E+07	TRUE	71.56506814	78.21474821	38.4296	42.0004	47.78018152	52.21981848	0.427081	371.293009	6.53065
OPT_act_sym_6_mc_3_sym_3_on_2_ntn_edge_1B_2NO2	act	methane	22-dimethylbutane	0.989153	0.0108468	298	4.00E+06	FALSE	50.92063373	32.31685504	28.778	18.264	61.17512011	38.82487989	0.426146	368.218235	6.56827
OPT_act_sym_6_mc_3_sym_3_on_2_ntn_edge_1B_2NO2	act	methane	22-dimethylbutane	0.992743	0.00725744	298	6.00E+06	FALSE	59.4669768	29.95077431	33.608	16.9268	66.50466609	33.49533391	0.426146	368.218235	6.56827
OPT_act_sym_6_mc_3_sym_3_on_2_ntn_edge_1B_2NO2	act	methane	22-dimethylbutane	0.994547	0.00545297	298	8.00E+06	FALSE	73.61427109	25.21861283	41.6034	14.2524	74.48358094	25.51641906	0.426146	368.218235	6.56827
OPT_act_sym_6_mc_3_sym_3_on_2_ntn_edge_1B_2NO2	act	methane	22-dimethylbutane	0.995633	0.00436714	298	1.00E+07	FALSE	74.40520594	25.12518697	42.0504	14.1996	74.75626667	25.24373333	0.426146	368.218235	6.56827
OPT_act_sym_6_mc_3_sym_3_on_2_ntn_edge_1B_2NO2	act	methane	methanol	0.995789	0.00421093	298	4.00E+06	FALSE	105.5298196	18.44736114	59.6406	10.4256	85.1203576	14.8796424	0.426146	368.218235	6.56827
OPT_act_sym_6_mc_3_sym_3_on_2_ntn_edge_1B_2NO2	act	methane	methanol	0.995789	0.00421093	298	4.00E+06	TRUE	15.8590401	146.1396354	8.9628	82.5914	9.789610963	90.21038904	0.426146	368.218235	6.56827
OPT_act_sym_6_mc_3_sym_3_on_2_ntn_edge_1B_2NO2	act	methane	methanol	0.997189	0.00281124	298	6.00E+06	FALSE	123.35328	1.599564003	69.7136	0.904	98.71986587	1.280134131	0.426146	368.218235	6.56827
OPT_act_sym_6_mc_3_sym_3_on_2_ntn_edge_1B_2NO2	act	methane	methanol	0.997189	0.00281124	298	6.00E+06	TRUE	34.15387645	122.8737647	19.3022	69.4426	21.75023213	78.24976787	0.426146	368.218235	6.56827
OPT_act_sym_6_mc_3_sym_3_on_2_ntn_edge_1B_2NO2	act	methane	methanol	0.99789	0.00210991	298	8.00E+06	FALSE	130.9529784	0.815706865	74.0086	0.461	99.38095545	0.61904455	0.426146	368.218235	6.56827
OPT_act_sym_6_mc_3_sym_3_on_2_ntn_edge_1B_2NO2	act	methane	methanol	0.99789	0.00210991	298	8.00E+06	TRUE	42.55937295	115.0797829	24.0526	65.0378	26.9979706	73.0020294	0.426146	368.218235	6.56827
OPT_act_sym_6_mc_3_sym_3_on_2_ntn_edge_1B_2NO2	act	methane	methanol	0.998311	0.00168864	298	1.00E+07	FALSE	134.4504322	0.419354722	75.9852	0.237	99.68906696	0.310933035	0.426146	368.218235	6.56827
OPT_act_sym_6_mc_3_sym_3_on_2_ntn_edge_1B_2NO2	act	methane	methanol	0.998311	0.00168864	298	1.00E+07	TRUE	61.67416279	92.64518998	34.8554	52.3588	39.96528088	60.03471912	0.426146	368.218235	6.56827
OPT_act_sym_6_mc_3_sym_3_on_2_ntn_edge_1B_2OH	act	methane	22-dimethylbutane	0.989153	0.0108468	298	4.00E+06	FALSE	42.26605281	40.98700655	23.2174	22.5148	50.76816772	49.23183228	0.465755	484.664326	6.73799
OPT_act_sym_6_mc_3_sym_3_on_2_ntn_edge_1B_2OH	act	methane	22-dimethylbutane	0.992743	0.00725744	298	6.00E+06	FALSE	50.28403083	39.57433945	27.6218	21.7388	55.95920633	44.04079367	0.465755	484.664326	6.73799
OPT_act_sym_6_mc_3_sym_3_on_2_ntn_edge_1B_2OH	act	methane	22-dimethylbutane	0.994547	0.00545297	298	8.00E+06	FALSE	63.36467276	34.97224871	34.8072	19.2108	64.43629901	35.56370099	0.465755	484.664326	6.73799
OPT_act_sym_6_mc_3_sym_3_on_2_ntn_edge_1B_2OH	act	methane	22-dimethylbutane	0.995633	0.00436714	298	1.00E+07	FALSE	66.1259272	34.0438206	36.324	18.7008	66.01387011	33.98612989	0.465755	484.664326	6.73799
OPT_act_sym_6_mc_3_sym_3_on_2_ntn_edge_1B_2OH	act	methane	methanol	0.995789	0.00421093	298	4.00E+06	FALSE	95.00076978	43.09617677	52.1854	23.6734	68.7928098	31.2071902	0.465755	484.664326	6.73799
OPT_act_sym_6_mc_3_sym_3_on_2_ntn_edge_1B_2OH	act	methane	methanol	0.995789	0.00421093	298	4.00E+06	TRUE	15.73012091	159.4799204	8.6408	87.6048	8.977864962	91.02213504	0.465755	484.664326	6.73799
OPT_act_sym_6_mc_3_sym_3_on_2_ntn_edge_1B_2OH	act	methane	methanol	0.997189	0.00281124	298	6.00E+06	FALSE	137.3618499	2.259175082	75.455	1.241	98.38192344	1.618076562	0.465755	484.664326	6.73799
OPT_act_sym_6_mc_3_sym_3_on_2_ntn_edge_1B_2OH	act	methane	methanol	0.997189	0.00281124	298	6.00E+06	TRUE	37.39271543	133.9761821	20.5404	73.5952	21.82001283	78.17998717	0.465755	484.664326	6.73799
OPT_act_sym_6_mc_3_sym_3_on_2_ntn_edge_1B_2OH	act	methane	methanol	0.99789	0.00210991	298	8.00E+06	FALSE	142.0695266	1.208776998	78.041	0.664	99.15634331	0.843656693	0.465755	484.664326	6.73799
OPT_act_sym_6_mc_3_sym_3_on_2_ntn_edge_1B_2OH	act	methane	methanol	0.99789	0.00210991	298	8.00E+06	TRUE	51.80556068	118.6633077	28.4576	65.1836	30.39004199	69.60995801	0.465755	484.664326	6.73799
OPT_act_sym_6_mc_3_sym_3_on_2_ntn_edge_1B_2OH	act	methane	methanol	0.998311	0.00168864	298	1.00E+07	FALSE	142.962274	5.219950547	78.5314	2.8674	96.47734365	3.522656354	0.465755	484.664326	6.73799
OPT_act_sym_6_mc_3_sym_3_on_2_ntn_edge_1B_2OH	act	methane	methanol	0.998311	0.00168864	298	1.00E+07	TRUE	64.19516081	110.7876886	35.2634	60.8574	36.68654443	63.31345557	0.465755	484.664326	6.73799
OPT_act_sym_6_mc_3_sym_3_on_2_ntn_edge_1B_2SH	act	methane	22-dimethylbutane	0.989153	0.0108468	298	4.00E+06	FALSE	42.56127137	38.26820047	23.9858	21.5664	52.65563463	47.34436537	0.461553	507.615204	8.05794
OPT_act_sym_6_mc_3_sym_3_on_2_ntn_edge_1B_2SH	act	methane	22-dimethylbutane	0.992743	0.00725744	298	6.00E+06	FALSE	49.22889276	36.86781543	27.7434	20.7772	57.17860043	42.82139957	0.461553	507.615204	8.05794
OPT_act_sym_6_mc_3_sym_3_on_2_ntn_edge_1B_2SH	act	methane	22-dimethylbutane	0.994547	0.00545297	298	8.00E+06	FALSE	59.40776848	33.8129461	33.4798	19.0556	63.72807669	36.27192331	0.461553	507.615204	8.05794
OPT_act_sym_6_mc_3_sym_3_on_2_ntn_edge_1B_2SH	act	methane	22-dimethylbutane	0.995633	0.00436714	298	1.00E+07	FALSE	74.6051046	27.42746006	42.0444	15.457	73.11891537	26.88108463	0.461553	507.615204	8.05794
OPT_act_sym_6_mc_3_sym_3_on_2_ntn_edge_1B_2SH	act	methane	methanol	0.995789	0.00421093	298	4.00E+06	FALSE	97.99856144	43.0052353	55.228	24.236	69.50065438	30.49934562	0.461553	507.615204	8.05794
OPT_act_sym_6_mc_3_sym_3_on_2_ntn_edge_1B_2SH	act	methane	methanol	0.995789	0.00421093	298	4.00E+06	TRUE	15.66685194	157.8779751	8.8292	88.9736	9.027553403	90.9724466	0.461553	507.615204	8.05794
OPT_act_sym_6_mc_3_sym_3_on_2_ntn_edge_1B_2SH	act	methane	methanol	0.997189	0.00281124	298	6.00E+06	FALSE	132.354485	3.686923498	74.5896	2.0778	97.28985201	2.71014799	0.461553	507.615204	8.05794
OPT_act_sym_6_mc_3_sym_3_on_2_ntn_edge_1B_2SH	act	methane	methanol	0.997189	0.00281124	298	6.00E+06	TRUE	29.45315641	141.5166088	16.5986	79.753	17.22711403	82.77288597	0.461553	507.615204	8.05794
OPT_act_sym_6_mc_3_sym_3_on_2_ntn_edge_1B_2SH	act	methane	methanol	0.99789	0.00210991	298	8.00E+06	FALSE	140.9161396	0.944354936	79.4146	0.5322	99.33430731	0.665692686	0.461553	507.615204	8.05794
OPT_act_sym_6_mc_3_sym_3_on_2_ntn_edge_1B_2SH	act	methane	methanol	0.99789	0.00210991	298	8.00E+06	TRUE	52.94953055	108.5951394	29.8402	61.1998	32.77702109	67.22297891	0.461553	507.615204	8.05794
OPT_act_sym_6_mc_3_sym_3_on_2_ntn_edge_1B_2SH	act	methane	methanol	0.998311	0.00168864	298	1.00E+07	FALSE	143.7176194	0.715807556	80.9934	0.4034	99.50440312	0.495596879	0.461553	507.615204	8.05794
OPT_act_sym_6_mc_3_sym_3_on_2_ntn_edge_1B_2SH	act	methane	methanol	0.998311	0.00168864	298	1.00E+07	TRUE	82.80512908	80.02778157	46.6656	45.1004	50.85282131	49.14717869	0.461553	507.615204	8.05794
OPT_act_sym_6_mc_3_sym_3_on_2_ntn_edge_1B_4Br	act	methane	22-dimethylbutane	0.989153	0.0108468	298	4.00E+06	FALSE	49.93486622	25.16163488	27.1528	13.682	66.4942647	33.5057353	0.36876	156.497738	6.67391
OPT_act_sym_6_mc_3_sym_3_on_2_ntn_edge_1B_4Br	act	methane	22-dimethylbutane	0.992743	0.00725744	298	6.00E+06	FALSE	64.58716923	19.54044988	35.1202	10.6254	76.7728481	23.2271519	0.36876	156.497738	6.67391
OPT_act_sym_6_mc_3_sym_3_on_2_ntn_edge_1B_4Br	act	methane	22-dimethylbutane	0.994547	0.00545297	298	8.00E+06	FALSE	63.06297957	19.98181755	34.2914	10.8654	75.9385076	24.0614924	0.36876	156.497738	6.67391
OPT_act_sym_6_mc_3_sym_3_on_2_ntn_edge_1B_4Br	act	methane	22-dimethylbutane	0.995633	0.00436714	298	1.00E+07	FALSE	68.71064663	18.03796079	37.3624	9.8084	79.20662783	20.79337217	0.36876	156.497738	6.67391
OPT_act_sym_6_mc_3_sym_3_on_2_ntn_edge_1B_4Br	act	methane	methanol	0.995789	0.00421093	298	4.00E+06	FALSE	90.44616502	8.537154031	49.1814	4.6422	91.37515885	8.624841148	0.36876	156.497738	6.67391
OPT_act_sym_6_mc_3_sym_3_on_2_ntn_edge_1B_4Br	act	methane	methanol	0.995789	0.00421093	298	4.00E+06	TRUE	30.51248219	88.26544096	16.5916	47.9956	25.68868135	74.31131865	0.36876	156.497738	6.67391
OPT_act_sym_6_mc_3_sym_3_on_2_ntn_edge_1B_4Br	act	methane	methanol	0.997189	0.00281124	298	6.00E+06	FALSE	102.1048919	2.630919081	55.521	1.4306	97.48804248	2.511957522	0.36876	156.497738	6.67391
OPT_act_sym_6_mc_3_sym_3_on_2_ntn_edge_1B_4Br	act	methane	methanol	0.997189	0.00281124	298	6.00E+06	TRUE	56.12357648	59.74720499	30.518	32.4884	48.43634932	51.56365068	0.36876	156.497738	6.67391
OPT_act_sym_6_mc_3_sym_3_on_2_ntn_edge_1B_4Br	act	methane	methanol	0.99789	0.00210991	298	8.00E+06	FALSE	106.29531	1.026179818	57.7996	0.558	99.04382634	0.95617366	0.36876	156.497738	6.67391
OPT_act_sym_6_mc_3_sym_3_on_2_ntn_edge_1B_4Br	act	methane	methanol	0.99789	0.00210991	298	8.00E+06	TRUE	69.77250366	43.13706859	37.9398	23.4564	61.79502966	38.20497034	0.36876	156.497738	6.67391
OPT_act_sym_6_mc_3_sym_3_on_2_ntn_edge_1B_4Br	act	methane	methanol	0.998311	0.00168864	298	1.00E+07	FALSE	106.5380622	0.65543098	57.9316	0.3564	99.38855339	0.61144661	0.36876	156.497738	6.67391
OPT_act_sym_6_mc_3_sym_3_on_2_ntn_edge_1B_4Br	act	methane	methanol	0.998311	0.00168864	298	1.00E+07	TRUE	83.01243015	32.5861746	45.1392	17.7192	71.81092742	28.18907258	0.36876	156.497738	6.67391
OPT_act_sym_6_mc_3_sym_3_on_2_ntn_edge_1B_4CN	act	methane	22-dimethylbutane	0.989153	0.0108468	298	4.00E+06	FALSE	48.54212789	27.03263284	26.8746	14.9662	64.23060745	35.76939255	0.367125	232.8751	6.68562
OPT_act_sym_6_mc_3_sym_3_on_2_ntn_edge_1B_4CN	act	methane	22-dimethylbutane	0.992743	0.00725744	298	6.00E+06	FALSE	57.67739562	24.37817431	31.9322	13.4966	70.29065263	29.70934737	0.367125	232.8751	6.68562
OPT_act_sym_6_mc_3_sym_3_on_2_ntn_edge_1B_4CN	act	methane	22-dimethylbutane	0.994547	0.00545297	298	8.00E+06	FALSE	65.14369242	21.44374772	36.0658	11.872	75.2345748	24.7654252	0.367125	232.8751	6.68562
OPT_act_sym_6_mc_3_sym_3_on_2_ntn_edge_1B_4CN	act	methane	22-dimethylbutane	0.995633	0.00436714	298	1.00E+07	FALSE	71.22785008	20.05113236	39.4342	11.101	78.03313334	21.96686666	0.367125	232.8751	6.68562
OPT_act_sym_6_mc_3_sym_3_on_2_ntn_edge_1B_4CN	act	methane	methanol	0.995789	0.00421093	298	4.00E+06	FALSE	97.20455174	3.82671192	53.8158	2.1186	96.21234875	3.787651249	0.367125	232.8751	6.68562
OPT_act_sym_6_mc_3_sym_3_on_2_ntn_edge_1B_4CN	act	methane	methanol	0.995789	0.00421093	298	4.00E+06	TRUE	12.41757722	128.6577901	6.8748	71.2294	8.802087468	91.19791253	0.367125	232.8751	6.68562
OPT_act_sym_6_mc_3_sym_3_on_2_ntn_edge_1B_4CN	act	methane	methanol	0.997189	0.00281124	298	6.00E+06	FALSE	106.1996548	1.404175326	58.7958	0.7774	98.69505079	1.304949205	0.367125	232.8751	6.68562
OPT_act_sym_6_mc_3_sym_3_on_2_ntn_edge_1B_4CN	act	methane	methanol	0.997189	0.00281124	298	6.00E+06	TRUE	23.38835172	109.4924405	12.9486	60.6188	17.60100262	82.39899738	0.367125	232.8751	6.68562
OPT_act_sym_6_mc_3_sym_3_on_2_ntn_edge_1B_4CN	act	methane	methanol	0.99789	0.00210991	298	8.00E+06	FALSE	110.134019	0.86952663	60.974	0.4814	99.2166677	0.783332303	0.367125	232.8751	6.68562
OPT_act_sym_6_mc_3_sym_3_on_2_ntn_edge_1B_4CN	act	methane	methanol	0.99789	0.00210991	298	8.00E+06	TRUE	30.25136249	102.6785596	16.7482	56.8464	22.75737622	77.24262378	0.367125	232.8751	6.68562
OPT_act_sym_6_mc_3_sym_3_on_2_ntn_edge_1B_4CN	act	methane	methanol	0.998311	0.00168864	298	1.00E+07	FALSE	115.8370588	0.466011364	64.1314	0.258	99.59931293	0.40068707	0.367125	232.8751	6.68562
OPT_act_sym_6_mc_3_sym_3_on_2_ntn_edge_1B_4CN	act	methane	methanol	0.998311	0.00168864	298	1.00E+07	TRUE	48.8672521	84.13853235	27.0546	46.582	36.74069688	63.25930312	0.367125	232.8751	6.68562
OPT_act_sym_6_mc_3_sym_3_on_2_ntn_edge_1B_4F	act	methane	22-dimethylbutane	0.989153	0.0108468	298	4.00E+06	FALSE	43.55550731	42.30818007	23.731	23.0514	50.72634153	49.27365847	0.457621	431.652514	6.93208
OPT_act_sym_6_mc_3_sym_3_on_2_ntn_edge_1B_4F	act	methane	22-dimethylbutane	0.992743	0.00725744	298	6.00E+06	FALSE	50.72084803	40.39277291	27.635	22.0078	55.66768998	44.33231002	0.457621	431.652514	6.93208
OPT_act_sym_6_mc_3_sym_3_on_2_ntn_edge_1B_4F	act	methane	22-dimethylbutane	0.994547	0.00545297	298	8.00E+06	FALSE	62.51943314	35.43136178	34.0634	19.3046	63.8273872	36.1726128	0.457621	431.652514	6.93208
OPT_act_sym_6_mc_3_sym_3_on_2_ntn_edge_1B_4F	act	methane	22-dimethylbutane	0.995633	0.00436714	298	1.00E+07	FALSE	69.56143602	33.99168626	37.9002	18.5202	67.17463896	32.82536104	0.457621	431.652514	6.93208
OPT_act_sym_6_mc_3_sym_3_on_2_ntn_edge_1B_4F	act	methane	methanol	0.995789	0.00421093	298	4.00E+06	FALSE	105.137059	25.96224656	57.2834	14.1454	80.19650337	19.80349663	0.457621	431.652514	6.93208
OPT_act_sym_6_mc_3_sym_3_on_2_ntn_edge_1B_4F	act	methane	methanol	0.995789	0.00421093	298	4.00E+06	TRUE	37.65254399	118.1084548	20.5148	64.3508	24.17328105	75.82671895	0.457621	431.652514	6.93208
OPT_act_sym_6_mc_3_sym_3_on_2_ntn_edge_1B_4F	act	methane	methanol	0.997189	0.00281124	298	6.00E+06	FALSE	126.4146704	9.145353413	68.8764	4.9828	93.25365019	6.746349812	0.457621	431.652514	6.93208
OPT_act_sym_6_mc_3_sym_3_on_2_ntn_edge_1B_4F	act	methane	methanol	0.997189	0.00281124	298	6.00E+06	TRUE	48.72798764	117.8537034	26.5492	64.212	29.25170668	70.74829332	0.457621	431.652514	6.93208
OPT_act_sym_6_mc_3_sym_3_on_2_ntn_edge_1B_4F	act	methane	methanol	0.99789	0.00210991	298	8.00E+06	FALSE	135.0897984	6.164689139	73.603	3.3588	95.63575696	4.36424304	0.457621	431.652514	6.93208
OPT_act_sym_6_mc_3_sym_3_on_2_ntn_edge_1B_4F	act	methane	methanol	0.99789	0.00210991	298	8.00E+06	TRUE	85.79724647	71.0304777	46.7462	38.7006	54.70795864	45.29204136	0.457621	431.652514	6.93208
OPT_act_sym_6_mc_3_sym_3_on_2_ntn_edge_1B_4F	act	methane	methanol	0.998311	0.00168864	298	1.00E+07	FALSE	142.6783787	0.39313934	77.7376	0.2142	99.72521481	0.274785188	0.457621	431.652514	6.93208
OPT_act_sym_6_mc_3_sym_3_on_2_ntn_edge_1B_4F	act	methane	methanol	0.998311	0.00168864	298	1.00E+07	TRUE	99.98917284	55.32252381	54.4786	30.1422	64.3796797	35.6203203	0.457621	431.652514	6.93208
OPT_act_sym_6_mc_3_sym_3_on_2_ntn_edge_1B_4H	act	methane	22-dimethylbutane	0.989153	0.0108468	298	4.00E+06	FALSE	49.80715926	39.32477856	26.866	21.2118	55.88026074	44.11973926	0.48049	464.825927	6.92028
OPT_act_sym_6_mc_3_sym_3_on_2_ntn_edge_1B_4H	act	methane	22-dimethylbutane	0.992743	0.00725744	298	6.00E+06	FALSE	62.63807377	36.60212561	33.787	19.7432	63.117642	36.882358	0.48049	464.825927	6.92028
OPT_act_sym_6_mc_3_sym_3_on_2_ntn_edge_1B_4H	act	methane	22-dimethylbutane	0.994547	0.00545297	298	8.00E+06	FALSE	78.05000246	31.51462444	42.1002	16.999	71.23649728	28.76350272	0.48049	464.825927	6.92028
OPT_act_sym_6_mc_3_sym_3_on_2_ntn_edge_1B_4H	act	methane	22-dimethylbutane	0.995633	0.00436714	298	1.00E+07	FALSE	95.15974238	24.83683885	51.3292	13.397	79.30204461	20.69795539	0.48049	464.825927	6.92028
OPT_act_sym_6_mc_3_sym_3_on_2_ntn_edge_1B_4H	act	methane	methanol	0.995789	0.00421093	298	4.00E+06	FALSE	124.2372161	16.0559772	67.0136	8.6606	88.55541254	11.44458746	0.48049	464.825927	6.92028
OPT_act_sym_6_mc_3_sym_3_on_2_ntn_edge_1B_4H	act	methane	methanol	0.995789	0.00421093	298	4.00E+06	TRUE	21.76713386	166.3695567	11.7412	89.7398	11.56985051	88.43014949	0.48049	464.825927	6.92028
OPT_act_sym_6_mc_3_sym_3_on_2_ntn_edge_1B_4H	act	methane	methanol	0.997189	0.00281124	298	6.00E+06	FALSE	144.9702387	3.676304504	78.197	1.983	97.52681467	2.473185333	0.48049	464.825927	6.92028
OPT_act_sym_6_mc_3_sym_3_on_2_ntn_edge_1B_4H	act	methane	methanol	0.997189	0.00281124	298	6.00E+06	TRUE	40.99774738	141.2850354	22.1142	76.2092	22.49128895	77.50871105	0.48049	464.825927	6.92028
OPT_act_sym_6_mc_3_sym_3_on_2_ntn_edge_1B_4H	act	methane	methanol	0.99789	0.00210991	298	8.00E+06	FALSE	149.4262979	1.780866418	80.6006	0.9606	98.8222341	1.177765898	0.48049	464.825927	6.92028
OPT_act_sym_6_mc_3_sym_3_on_2_ntn_edge_1B_4H	act	methane	methanol	0.99789	0.00210991	298	8.00E+06	TRUE	72.82086253	98.37479396	39.2796	53.0634	42.53662974	57.46337026	0.48049	464.825927	6.92028
OPT_act_sym_6_mc_3_sym_3_on_2_ntn_edge_1B_4H	act	methane	methanol	0.998311	0.00168864	298	1.00E+07	FALSE	154.4904398	0.723766656	83.3322	0.3904	99.53369819	0.466301811	0.48049	464.825927	6.92028
OPT_act_sym_6_mc_3_sym_3_on_2_ntn_edge_1B_4H	act	methane	methanol	0.998311	0.00168864	298	1.00E+07	TRUE	102.594665	67.97399894	55.3396	36.6652	60.14860094	39.85139906	0.48049	464.825927	6.92028
OPT_act_sym_6_mc_3_sym_3_on_2_ntn_edge_ntn_edge	act	methane	22-dimethylbutane	0.989153	0.0108468	298	4.00E+06	FALSE	50.2533412	83.18170266	26.9248	44.5672	37.66127679	62.33872321	0.693982	1367.308352	8.02204
OPT_act_sym_6_mc_3_sym_3_on_2_ntn_edge_ntn_edge	act	methane	22-dimethylbutane	0.992743	0.00725744	298	6.00E+06	FALSE	69.35553864	71.99280878	37.1594	38.5724	49.06710259	50.93289741	0.693982	1367.308352	8.02204
OPT_act_sym_6_mc_3_sym_3_on_2_ntn_edge_ntn_edge	act	methane	22-dimethylbutane	0.994547	0.00545297	298	8.00E+06	FALSE	94.05143645	61.35936544	50.391	32.8752	60.51795326	39.48204674	0.693982	1367.308352	8.02204
OPT_act_sym_6_mc_3_sym_3_on_2_ntn_edge_ntn_edge	act	methane	22-dimethylbutane	0.995633	0.00436714	298	1.00E+07	FALSE	98.95903596	59.73594182	53.0204	32.0054	62.35801369	37.64198631	0.693982	1367.308352	8.02204
OPT_act_sym_6_mc_3_sym_3_on_2_ntn_edge_ntn_edge	act	methane	methanol	0.995789	0.00421093	298	4.00E+06	FALSE	106.6614326	139.4001644	57.1472	74.688	43.34745197	56.65254803	0.693982	1367.308352	8.02204
OPT_act_sym_6_mc_3_sym_3_on_2_ntn_edge_ntn_edge	act	methane	methanol	0.995789	0.00421093	298	4.00E+06	TRUE	20.18099585	269.3804404	10.8126	144.329	6.969503989	93.03049601	0.693982	1367.308352	8.02204
OPT_act_sym_6_mc_3_sym_3_on_2_ntn_edge_ntn_edge	act	methane	methanol	0.997189	0.00281124	298	6.00E+06	FALSE	212.7752537	11.34642084	114.001	6.0792	94.93738352	5.062616485	0.693982	1367.308352	8.02204
OPT_act_sym_6_mc_3_sym_3_on_2_ntn_edge_ntn_edge	act	methane	methanol	0.997189	0.00281124	298	6.00E+06	TRUE	36.64069714	247.8903283	19.6314	132.815	12.87757533	87.12242467	0.693982	1367.308352	8.02204
OPT_act_sym_6_mc_3_sym_3_on_2_ntn_edge_ntn_edge	act	methane	methanol	0.99789	0.00210991	298	8.00E+06	FALSE	226.3942436	3.32486414	121.2978	1.7814	98.55263928	1.447360724	0.693982	1367.308352	8.02204
OPT_act_sym_6_mc_3_sym_3_on_2_ntn_edge_ntn_edge	act	methane	methanol	0.99789	0.00210991	298	8.00E+06	TRUE	79.24054227	186.1311728	42.4556	99.7256	29.86020655	70.13979345	0.693982	1367.308352	8.02204
OPT_act_sym_6_mc_3_sym_3_on_2_ntn_edge_ntn_edge	act	methane	methanol	0.998311	0.00168864	298	1.00E+07	FALSE	232.3183026	1.305383395	124.4718	0.6994	99.44124527	0.55875473	0.693982	1367.308352	8.02204
OPT_act_sym_6_mc_3_sym_3_on_2_ntn_edge_ntn_edge	act	methane	methanol	0.998311	0.00168864	298	1.00E+07	TRUE	131.9605616	124.5172259	70.702	66.714	51.45106829	48.54893171	0.693982	1367.308352	8.02204
OPT_apo_sym_6_mc_3_sym_3_on_1_1B_2Br	apo	methane	22-dimethylbutane	0.989153	0.0108468	298	4.00E+06	FALSE	40.75331786	104.9220538	42.7642	110.0992	27.97543428	72.02456572	0.824195	2715.277196	12.78053
OPT_apo_sym_6_mc_3_sym_3_on_1_1B_2Br	apo	methane	22-dimethylbutane	0.992743	0.00725744	298	6.00E+06	FALSE	70.73227278	92.00806593	74.2224	96.548	43.46326998	56.53673002	0.824195	2715.277196	12.78053
OPT_apo_sym_6_mc_3_sym_3_on_1_1B_2Br	apo	methane	22-dimethylbutane	0.994547	0.00545297	298	8.00E+06	FALSE	116.5697253	69.97846763	122.3216	73.4314	62.48772688	37.51227312	0.824195	2715.277196	12.78053
OPT_apo_sym_6_mc_3_sym_3_on_1_1B_2Br	apo	methane	22-dimethylbutane	0.995633	0.00436714	298	1.00E+07	FALSE	165.7382151	45.34647853	173.9162	47.584	78.51740089	21.48259911	0.824195	2715.277196	12.78053
OPT_apo_sym_6_mc_3_sym_3_on_1_1B_2Br	apo	methane	methanol	0.995789	0.00421093	298	4.00E+06	FALSE	151.8824949	17.29768412	159.3768	18.1512	89.7755847	10.2244153	0.824195	2715.277196	12.78053
OPT_apo_sym_6_mc_3_sym_3_on_1_1B_2Br	apo	methane	methanol	0.995789	0.00421093	298	4.00E+06	TRUE	128.7051306	74.58439819	135.0558	78.2646	63.31124449	36.68875551	0.824195	2715.277196	12.78053
OPT_apo_sym_6_mc_3_sym_3_on_1_1B_2Br	apo	methane	methanol	0.997189	0.00281124	298	6.00E+06	FALSE	188.8662152	2.898957374	198.1854	3.042	98.48827744	1.511722559	0.824195	2715.277196	12.78053
OPT_apo_sym_6_mc_3_sym_3_on_1_1B_2Br	apo	methane	methanol	0.997189	0.00281124	298	6.00E+06	TRUE	172.7593717	36.73060949	181.2838	38.543	82.46665102	17.53334898	0.824195	2715.277196	12.78053
OPT_apo_sym_6_mc_3_sym_3_on_1_1B_2Br	apo	methane	methanol	0.99789	0.00210991	298	8.00E+06	FALSE	214.6707478	0.778201378	225.2632	0.8166	99.63880011	0.361199895	0.824195	2715.277196	12.78053
OPT_apo_sym_6_mc_3_sym_3_on_1_1B_2Br	apo	methane	methanol	0.99789	0.00210991	298	8.00E+06	TRUE	203.5100478	19.58425819	213.5518	20.5506	91.22153382	8.778466175	0.824195	2715.277196	12.78053
OPT_apo_sym_6_mc_3_sym_3_on_1_1B_2Br	apo	methane	methanol	0.998311	0.00168864	298	1.00E+07	FALSE	228.4265959	3.471696816	239.6978	3.643	98.50292265	1.49707735	0.824195	2715.277196	12.78053
OPT_apo_sym_6_mc_3_sym_3_on_1_1B_2Br	apo	methane	methanol	0.998311	0.00168864	298	1.00E+07	TRUE	227.3501126	7.874643187	238.5682	8.2632	96.65228978	3.347710218	0.824195	2715.277196	12.78053
OPT_apo_sym_6_mc_3_sym_3_on_1_1B_2CF3	apo	methane	22-dimethylbutane	0.989153	0.0108468	298	4.00E+06	FALSE	48.38912932	87.05127665	50.598	91.025	35.72724769	64.27275231	0.733623	2892.362342	12.53153
OPT_apo_sym_6_mc_3_sym_3_on_1_1B_2CF3	apo	methane	22-dimethylbutane	0.992743	0.00725744	298	6.00E+06	FALSE	79.20829374	72.25624155	82.824	75.5546	52.29494389	47.70505611	0.733623	2892.362342	12.53153
OPT_apo_sym_6_mc_3_sym_3_on_1_1B_2CF3	apo	methane	22-dimethylbutane	0.994547	0.00545297	298	8.00E+06	FALSE	119.7058578	52.07928099	125.1702	54.4566	69.68347708	30.31652292	0.733623	2892.362342	12.53153
OPT_apo_sym_6_mc_3_sym_3_on_1_1B_2CF3	apo	methane	22-dimethylbutane	0.995633	0.00436714	298	1.00E+07	FALSE	155.3654653	33.69776198	162.4576	35.236	82.17645892	17.82354108	0.733623	2892.362342	12.53153
OPT_apo_sym_6_mc_3_sym_3_on_1_1B_2CF3	apo	methane	methanol	0.995789	0.00421093	298	4.00E+06	FALSE	135.9509028	12.57746301	142.1568	13.1516	91.53194547	8.468054529	0.733623	2892.362342	12.53153
OPT_apo_sym_6_mc_3_sym_3_on_1_1B_2CF3	apo	methane	methanol	0.995789	0.00421093	298	4.00E+06	TRUE	104.5912123	100.4360859	109.3656	105.0208	51.01331055	48.98668945	0.733623	2892.362342	12.53153
OPT_apo_sym_6_mc_3_sym_3_on_1_1B_2CF3	apo	methane	methanol	0.997189	0.00281124	298	6.00E+06	FALSE	168.5846356	7.0006345	176.2802	7.3202	96.01297165	3.987028351	0.733623	2892.362342	12.53153
OPT_apo_sym_6_mc_3_sym_3_on_1_1B_2CF3	apo	methane	methanol	0.997189	0.00281124	298	6.00E+06	TRUE	145.4223495	59.26678525	152.0606	61.9722	71.04546593	28.95453407	0.733623	2892.362342	12.53153
OPT_apo_sym_6_mc_3_sym_3_on_1_1B_2CF3	apo	methane	methanol	0.99789	0.00210991	298	8.00E+06	FALSE	191.9202115	0.604218584	200.681	0.6318	99.68616005	0.313839955	0.733623	2892.362342	12.53153
OPT_apo_sym_6_mc_3_sym_3_on_1_1B_2CF3	apo	methane	methanol	0.99789	0.00210991	298	8.00E+06	TRUE	173.4514738	34.94904339	181.3692	36.5444	83.22986725	16.77013275	0.733623	2892.362342	12.53153
OPT_apo_sym_6_mc_3_sym_3_on_1_1B_2CF3	apo	methane	methanol	0.998311	0.00168864	298	1.00E+07	FALSE	206.1777809	0.365706215	215.5894	0.3824	99.82293985	0.177060153	0.733623	2892.362342	12.53153
OPT_apo_sym_6_mc_3_sym_3_on_1_1B_2CF3	apo	methane	methanol	0.998311	0.00168864	298	1.00E+07	TRUE	198.7917394	14.11679544	207.8662	14.7612	93.3695493	6.630450699	0.733623	2892.362342	12.53153
OPT_apo_sym_6_mc_3_sym_3_on_1_1B_2CH3	apo	methane	22-dimethylbutane	0.989153	0.0108468	298	4.00E+06	FALSE	54.89211431	92.17003103	57.4868	96.5268	37.32579461	62.67420539	0.779175	4283.863084	12.70903
OPT_apo_sym_6_mc_3_sym_3_on_1_1B_2CH3	apo	methane	22-dimethylbutane	0.992743	0.00725744	298	6.00E+06	FALSE	92.09555159	73.13690454	96.4488	76.594	55.73696219	44.26303781	0.779175	4283.863084	12.70903
OPT_apo_sym_6_mc_3_sym_3_on_1_1B_2CH3	apo	methane	22-dimethylbutane	0.994547	0.00545297	298	8.00E+06	FALSE	141.8388446	46.59892368	148.5434	48.8016	75.27092148	24.72907852	0.779175	4283.863084	12.70903
OPT_apo_sym_6_mc_3_sym_3_on_1_1B_2CH3	apo	methane	22-dimethylbutane	0.995633	0.00436714	298	1.00E+07	FALSE	177.5471548	27.09122945	185.9396	28.3718	86.76141353	13.23858647	0.779175	4283.863084	12.70903
OPT_apo_sym_6_mc_3_sym_3_on_1_1B_2CH3	apo	methane	methanol	0.995789	0.00421093	298	4.00E+06	FALSE	130.8399495	18.65690981	137.0246	19.5388	87.52019948	12.47980052	0.779175	4283.863084	12.70903
OPT_apo_sym_6_mc_3_sym_3_on_1_1B_2CH3	apo	methane	methanol	0.995789	0.00421093	298	4.00E+06	TRUE	121.1022396	52.61648083	126.8266	55.1036	69.71168063	30.28831937	0.779175	4283.863084	12.70903
OPT_apo_sym_6_mc_3_sym_3_on_1_1B_2CH3	apo	methane	methanol	0.997189	0.00281124	298	6.00E+06	FALSE	169.4640344	1.512505637	177.4744	1.584	99.11537241	0.884627585	0.779175	4283.863084	12.70903
OPT_apo_sym_6_mc_3_sym_3_on_1_1B_2CH3	apo	methane	methanol	0.997189	0.00281124	298	6.00E+06	TRUE	160.224	37.26779515	167.7976	39.0294	81.12944635	18.87055365	0.779175	4283.863084	12.70903
OPT_apo_sym_6_mc_3_sym_3_on_1_1B_2CH3	apo	methane	methanol	0.99789	0.00210991	298	8.00E+06	FALSE	196.2426411	0.700106776	205.5188	0.7332	99.64451254	0.355487462	0.779175	4283.863084	12.70903
OPT_apo_sym_6_mc_3_sym_3_on_1_1B_2CH3	apo	methane	methanol	0.99789	0.00210991	298	8.00E+06	TRUE	190.0404132	12.28299717	199.0234	12.8636	93.92902821	6.070971792	0.779175	4283.863084	12.70903
OPT_apo_sym_6_mc_3_sym_3_on_1_1B_2CH3	apo	methane	methanol	0.998311	0.00168864	298	1.00E+07	FALSE	213.1256034	0.342796417	223.1998	0.359	99.83941585	0.160584151	0.779175	4283.863084	12.70903
OPT_apo_sym_6_mc_3_sym_3_on_1_1B_2CH3	apo	methane	methanol	0.998311	0.00168864	298	1.00E+07	TRUE	210.3557319	5.951480515	220.299	6.2328	97.24859821	2.75140179	0.779175	4283.863084	12.70903
OPT_apo_sym_6_mc_3_sym_3_on_1_1B_2CN	apo	methane	22-dimethylbutane	0.989153	0.0108468	298	4.00E+06	FALSE	47.64762096	99.65689853	50.011	104.6	32.34634017	67.65365983	0.80606	3922.447967	12.83726
OPT_apo_sym_6_mc_3_sym_3_on_1_1B_2CN	apo	methane	22-dimethylbutane	0.992743	0.00725744	298	6.00E+06	FALSE	87.52105109	80.76629508	91.8622	84.7724	52.00691144	47.99308856	0.80606	3922.447967	12.83726
OPT_apo_sym_6_mc_3_sym_3_on_1_1B_2CN	apo	methane	22-dimethylbutane	0.994547	0.00545297	298	8.00E+06	FALSE	123.2191811	62.31300058	129.331	65.4038	66.41391266	33.58608734	0.80606	3922.447967	12.83726
OPT_apo_sym_6_mc_3_sym_3_on_1_1B_2CN	apo	methane	22-dimethylbutane	0.995633	0.00436714	298	1.00E+07	FALSE	173.1531943	36.31817504	181.7418	38.1196	82.66198614	17.33801386	0.80606	3922.447967	12.83726
OPT_apo_sym_6_mc_3_sym_3_on_1_1B_2CN	apo	methane	methanol	0.995789	0.00421093	298	4.00E+06	FALSE	143.0303247	8.903572162	150.1248	9.3452	94.13983821	5.860161786	0.80606	3922.447967	12.83726
OPT_apo_sym_6_mc_3_sym_3_on_1_1B_2CN	apo	methane	methanol	0.995789	0.00421093	298	4.00E+06	TRUE	38.08475077	303.2719483	39.9738	318.3146	11.15687809	88.84312191	0.80606	3922.447967	12.83726
OPT_apo_sym_6_mc_3_sym_3_on_1_1B_2CN	apo	methane	methanol	0.997189	0.00281124	298	6.00E+06	FALSE	180.1667152	1.100036855	189.1032	1.1546	99.3931392	0.606860796	0.80606	3922.447967	12.83726
OPT_apo_sym_6_mc_3_sym_3_on_1_1B_2CN	apo	methane	methanol	0.997189	0.00281124	298	6.00E+06	TRUE	83.47589565	234.4568591	87.6164	246.0862	26.25583379	73.74416621	0.80606	3922.447967	12.83726
OPT_apo_sym_6_mc_3_sym_3_on_1_1B_2CN	apo	methane	methanol	0.99789	0.00210991	298	8.00E+06	FALSE	204.1354379	2.187497505	214.2608	2.296	98.93977007	1.060229926	0.80606	3922.447967	12.83726
OPT_apo_sym_6_mc_3_sym_3_on_1_1B_2CN	apo	methane	methanol	0.99789	0.00210991	298	8.00E+06	TRUE	121.8626659	169.37938	127.9072	177.7808	41.8424014	58.1575986	0.80606	3922.447967	12.83726
OPT_apo_sym_6_mc_3_sym_3_on_1_1B_2CN	apo	methane	methanol	0.998311	0.00168864	298	1.00E+07	FALSE	221.209923	0.387004132	232.1822	0.4062	99.82535672	0.174643275	0.80606	3922.447967	12.83726
OPT_apo_sym_6_mc_3_sym_3_on_1_1B_2CN	apo	methane	methanol	0.998311	0.00168864	298	1.00E+07	TRUE	171.0497287	98.40442283	179.534	103.2854	63.48008659	36.51991341	0.80606	3922.447967	12.83726
OPT_apo_sym_6_mc_3_sym_3_on_1_1B_2F	apo	methane	22-dimethylbutane	0.989153	0.0108468	298	4.00E+06	FALSE	50.21194759	107.0938165	53.281	113.6396	31.91996674	68.08003326	0.850486	3949.453985	14.25404
OPT_apo_sym_6_mc_3_sym_3_on_1_1B_2F	apo	methane	22-dimethylbutane	0.992743	0.00725744	298	6.00E+06	FALSE	91.271884	86.3519971	96.8506	91.63	51.38491707	48.61508293	0.850486	3949.453985	14.25404
OPT_apo_sym_6_mc_3_sym_3_on_1_1B_2F	apo	methane	22-dimethylbutane	0.994547	0.00545297	298	8.00E+06	FALSE	147.5638113	54.91979477	156.5832	58.2766	72.87691788	27.12308212	0.850486	3949.453985	14.25404
OPT_apo_sym_6_mc_3_sym_3_on_1_1B_2F	apo	methane	22-dimethylbutane	0.995633	0.00436714	298	1.00E+07	FALSE	198.4787884	26.37340587	210.6102	27.9854	88.27078119	11.72921881	0.850486	3949.453985	14.25404
OPT_apo_sym_6_mc_3_sym_3_on_1_1B_2F	apo	methane	methanol	0.995789	0.00421093	298	4.00E+06	FALSE	135.3067848	13.00774141	143.577	13.8028	91.22962413	8.770375868	0.850486	3949.453985	14.25404
OPT_apo_sym_6_mc_3_sym_3_on_1_1B_2F	apo	methane	methanol	0.995789	0.00421093	298	4.00E+06	TRUE	123.6868197	69.13361809	131.2468	73.3592	64.14611497	35.85388503	0.850486	3949.453985	14.25404
OPT_apo_sym_6_mc_3_sym_3_on_1_1B_2F	apo	methane	methanol	0.997189	0.00281124	298	6.00E+06	FALSE	176.7463194	2.103245522	187.5494	2.2318	98.82401418	1.175985819	0.850486	3949.453985	14.25404
OPT_apo_sym_6_mc_3_sym_3_on_1_1B_2F	apo	methane	methanol	0.997189	0.00281124	298	6.00E+06	TRUE	166.5782139	43.61119829	176.7598	46.2768	79.25147711	20.74852289	0.850486	3949.453985	14.25404
OPT_apo_sym_6_mc_3_sym_3_on_1_1B_2F	apo	methane	methanol	0.99789	0.00210991	298	8.00E+06	FALSE	203.4855645	2.311138685	215.923	2.4524	98.87697973	1.123020267	0.850486	3949.453985	14.25404
OPT_apo_sym_6_mc_3_sym_3_on_1_1B_2F	apo	methane	methanol	0.99789	0.00210991	298	8.00E+06	TRUE	202.4349783	11.39661652	214.8082	12.0932	94.6702841	5.329715903	0.850486	3949.453985	14.25404
OPT_apo_sym_6_mc_3_sym_3_on_1_1B_2F	apo	methane	methanol	0.998311	0.00168864	298	1.00E+07	FALSE	225.1096576	0.391472439	238.8688	0.4154	99.8263989	0.173601099	0.850486	3949.453985	14.25404
OPT_apo_sym_6_mc_3_sym_3_on_1_1B_2F	apo	methane	methanol	0.998311	0.00168864	298	1.00E+07	TRUE	221.5176105	6.760768604	235.0572	7.174	97.03836665	2.961633349	0.850486	3949.453985	14.25404
OPT_apo_sym_6_mc_3_sym_3_on_1_1B_2NH2	apo	methane	22-dimethylbutane	0.989153	0.0108468	298	4.00E+06	FALSE	49.22979743	101.2691646	51.4206	105.7758	32.71105445	67.28894555	0.812012	4268.794427	13.03916
OPT_apo_sym_6_mc_3_sym_3_on_1_1B_2NH2	apo	methane	22-dimethylbutane	0.992743	0.00725744	298	6.00E+06	FALSE	86.91035404	82.46421418	90.778	86.134	51.31251696	48.68748304	0.812012	4268.794427	13.03916
OPT_apo_sym_6_mc_3_sym_3_on_1_1B_2NH2	apo	methane	22-dimethylbutane	0.994547	0.00545297	298	8.00E+06	FALSE	133.6118642	57.84443276	139.5578	60.4186	69.78713488	30.21286512	0.812012	4268.794427	13.03916
OPT_apo_sym_6_mc_3_sym_3_on_1_1B_2NH2	apo	methane	22-dimethylbutane	0.995633	0.00436714	298	1.00E+07	FALSE	177.1103154	34.18951346	184.992	35.711	83.81943154	16.18056846	0.812012	4268.794427	13.03916
OPT_apo_sym_6_mc_3_sym_3_on_1_1B_2NH2	apo	methane	methanol	0.995789	0.00421093	298	4.00E+06	FALSE	138.0158787	5.48414693	144.1578	5.7282	96.1782955	3.821704495	0.812012	4268.794427	13.03916
OPT_apo_sym_6_mc_3_sym_3_on_1_1B_2NH2	apo	methane	methanol	0.995789	0.00421093	298	4.00E+06	TRUE	57.60948816	266.2690146	60.1732	278.1184	17.78737633	82.21262367	0.812012	4268.794427	13.03916
OPT_apo_sym_6_mc_3_sym_3_on_1_1B_2NH2	apo	methane	methanol	0.997189	0.00281124	298	6.00E+06	FALSE	176.5188371	0.9914777	184.3742	1.0356	99.44145347	0.558546528	0.812012	4268.794427	13.03916
OPT_apo_sym_6_mc_3_sym_3_on_1_1B_2NH2	apo	methane	methanol	0.997189	0.00281124	298	6.00E+06	TRUE	116.9823054	162.4910936	122.1882	169.7222	41.85811811	58.14188189	0.812012	4268.794427	13.03916
OPT_apo_sym_6_mc_3_sym_3_on_1_1B_2NH2	apo	methane	methanol	0.99789	0.00210991	298	8.00E+06	FALSE	200.1559489	0.836188319	209.0632	0.8734	99.58396964	0.416030363	0.812012	4268.794427	13.03916
OPT_apo_sym_6_mc_3_sym_3_on_1_1B_2NH2	apo	methane	methanol	0.99789	0.00210991	298	8.00E+06	TRUE	165.3471927	88.46075863	172.7054	92.3974	65.1465771	34.8534229	0.812012	4268.794427	13.03916
OPT_apo_sym_6_mc_3_sym_3_on_1_1B_2NH2	apo	methane	methanol	0.998311	0.00168864	298	1.00E+07	FALSE	219.3518992	0.384872572	229.1134	0.402	99.82484835	0.175151646	0.812012	4268.794427	13.03916
OPT_apo_sym_6_mc_3_sym_3_on_1_1B_2NH2	apo	methane	methanol	0.998311	0.00168864	298	1.00E+07	TRUE	200.6350291	41.57179064	209.5636	43.4218	82.83624272	17.16375728	0.812012	4268.794427	13.03916
OPT_apo_sym_6_mc_3_sym_3_on_1_1B_2NO2	apo	methane	22-dimethylbutane	0.989153	0.0108468	298	4.00E+06	FALSE	49.70731767	94.03742963	51.9166	98.217	34.58026718	65.41973282	0.772587	3366.119874	11.54064
OPT_apo_sym_6_mc_3_sym_3_on_1_1B_2NO2	apo	methane	22-dimethylbutane	0.992743	0.00725744	298	6.00E+06	FALSE	84.23644251	78.01170601	87.9804	81.479	51.91827659	48.08172341	0.772587	3366.119874	11.54064
OPT_apo_sym_6_mc_3_sym_3_on_1_1B_2NO2	apo	methane	22-dimethylbutane	0.994547	0.00545297	298	8.00E+06	FALSE	128.7224266	55.03014046	134.4436	57.476	70.05204263	29.94795737	0.772587	3366.119874	11.54064
OPT_apo_sym_6_mc_3_sym_3_on_1_1B_2NO2	apo	methane	22-dimethylbutane	0.995633	0.00436714	298	1.00E+07	FALSE	169.0033099	35.45554916	176.5148	37.0314	82.65883448	17.34116552	0.772587	3366.119874	11.54064
OPT_apo_sym_6_mc_3_sym_3_on_1_1B_2NO2	apo	methane	methanol	0.995789	0.00421093	298	4.00E+06	FALSE	142.4119831	4.523738737	148.7416	4.7248	96.92128049	3.078719511	0.772587	3366.119874	11.54064
OPT_apo_sym_6_mc_3_sym_3_on_1_1B_2NO2	apo	methane	methanol	0.995789	0.00421093	298	4.00E+06	TRUE	32.96159499	301.6949227	34.4266	315.104	9.849380855	90.15061914	0.772587	3366.119874	11.54064
OPT_apo_sym_6_mc_3_sym_3_on_1_1B_2NO2	apo	methane	methanol	0.997189	0.00281124	298	6.00E+06	FALSE	178.6499568	1.066211365	186.5902	1.1136	99.40672485	0.593275149	0.772587	3366.119874	11.54064
OPT_apo_sym_6_mc_3_sym_3_on_1_1B_2NO2	apo	methane	methanol	0.997189	0.00281124	298	6.00E+06	TRUE	70.98022589	236.4465404	74.135	246.9556	23.08849901	76.91150099	0.772587	3366.119874	11.54064
OPT_apo_sym_6_mc_3_sym_3_on_1_1B_2NO2	apo	methane	methanol	0.99789	0.00210991	298	8.00E+06	FALSE	201.3341397	0.717892674	210.2826	0.7498	99.64469911	0.355300892	0.772587	3366.119874	11.54064
OPT_apo_sym_6_mc_3_sym_3_on_1_1B_2NO2	apo	methane	methanol	0.99789	0.00210991	298	8.00E+06	TRUE	111.7867467	175.0041956	116.7552	182.7824	38.97847883	61.02152117	0.772587	3366.119874	11.54064
OPT_apo_sym_6_mc_3_sym_3_on_1_1B_2NO2	apo	methane	methanol	0.998311	0.00168864	298	1.00E+07	FALSE	217.1710551	0.411127119	226.8234	0.4294	99.81104743	0.188952567	0.772587	3366.119874	11.54064
OPT_apo_sym_6_mc_3_sym_3_on_1_1B_2NO2	apo	methane	methanol	0.998311	0.00168864	298	1.00E+07	TRUE	145.1405114	132.9556764	151.5914	138.865	52.19075909	47.80924091	0.772587	3366.119874	11.54064
OPT_apo_sym_6_mc_3_sym_3_on_1_1B_2OH	apo	methane	22-dimethylbutane	0.989153	0.0108468	298	4.00E+06	FALSE	51.93518001	103.7044153	54.7066	109.2384	33.36887371	66.63112629	0.827518	4115.038542	13.46438
OPT_apo_sym_6_mc_3_sym_3_on_1_1B_2OH	apo	methane	22-dimethylbutane	0.992743	0.00725744	298	6.00E+06	FALSE	87.40784989	85.87998161	92.0722	90.4628	50.44084696	49.55915304	0.827518	4115.038542	13.46438
OPT_apo_sym_6_mc_3_sym_3_on_1_1B_2OH	apo	methane	22-dimethylbutane	0.994547	0.00545297	298	8.00E+06	FALSE	143.8244857	55.55406523	151.4994	58.5186	72.13638831	27.86361169	0.827518	4115.038542	13.46438
OPT_apo_sym_6_mc_3_sym_3_on_1_1B_2OH	apo	methane	22-dimethylbutane	0.995633	0.00436714	298	1.00E+07	FALSE	187.2197801	31.05026303	197.2104	32.7072	85.77438178	14.22561822	0.827518	4115.038542	13.46438
OPT_apo_sym_6_mc_3_sym_3_on_1_1B_2OH	apo	methane	methanol	0.995789	0.00421093	298	4.00E+06	FALSE	137.4192867	11.40309594	144.7524	12.0116	92.33778163	7.662218366	0.827518	4115.038542	13.46438
OPT_apo_sym_6_mc_3_sym_3_on_1_1B_2OH	apo	methane	methanol	0.995789	0.00421093	298	4.00E+06	TRUE	41.40965424	318.0671637	43.6194	335.0402	11.51942272	88.48057728	0.827518	4115.038542	13.46438
OPT_apo_sym_6_mc_3_sym_3_on_1_1B_2OH	apo	methane	methanol	0.997189	0.00281124	298	6.00E+06	FALSE	177.2285431	2.036904546	186.686	2.1456	98.8637495	1.1362505	0.827518	4115.038542	13.46438
OPT_apo_sym_6_mc_3_sym_3_on_1_1B_2OH	apo	methane	methanol	0.997189	0.00281124	298	6.00E+06	TRUE	85.35670524	248.5904534	89.9116	261.856	25.55994355	74.44005645	0.827518	4115.038542	13.46438
OPT_apo_sym_6_mc_3_sym_3_on_1_1B_2OH	apo	methane	methanol	0.99789	0.00210991	298	8.00E+06	FALSE	203.8357036	0.567325763	214.713	0.5976	99.72244748	0.277552522	0.827518	4115.038542	13.46438
OPT_apo_sym_6_mc_3_sym_3_on_1_1B_2OH	apo	methane	methanol	0.99789	0.00210991	298	8.00E+06	TRUE	139.6301104	156.5281779	147.0812	164.881	47.14712231	52.85287769	0.827518	4115.038542	13.46438
OPT_apo_sym_6_mc_3_sym_3_on_1_1B_2OH	apo	methane	methanol	0.998311	0.00168864	298	1.00E+07	FALSE	223.0361112	0.355433008	234.938	0.3744	99.84089236	0.159107637	0.827518	4115.038542	13.46438
OPT_apo_sym_6_mc_3_sym_3_on_1_1B_2OH	apo	methane	methanol	0.998311	0.00168864	298	1.00E+07	TRUE	184.8992127	88.50699608	194.766	93.23	67.62802261	32.37197739	0.827518	4115.038542	13.46438
OPT_apo_sym_6_mc_3_sym_3_on_1_1B_2SH	apo	methane	22-dimethylbutane	0.989153	0.0108468	298	4.00E+06	FALSE	49.53741605	97.71546451	51.7178	102.0164	33.64105059	66.35894941	0.803112	3748.102285	13.13685
OPT_apo_sym_6_mc_3_sym_3_on_1_1B_2SH	apo	methane	22-dimethylbutane	0.992743	0.00725744	298	6.00E+06	FALSE	79.74618058	84.02485518	83.2562	87.7232	48.69370228	51.30629772	0.803112	3748.102285	13.13685
OPT_apo_sym_6_mc_3_sym_3_on_1_1B_2SH	apo	methane	22-dimethylbutane	0.994547	0.00545297	298	8.00E+06	FALSE	122.5223904	63.51192937	127.9152	66.3074	65.86010073	34.13989927	0.803112	3748.102285	13.13685
OPT_apo_sym_6_mc_3_sym_3_on_1_1B_2SH	apo	methane	22-dimethylbutane	0.995633	0.00436714	298	1.00E+07	FALSE	169.8286122	40.01552121	177.3036	41.7768	80.93083635	19.06916365	0.803112	3748.102285	13.13685
OPT_apo_sym_6_mc_3_sym_3_on_1_1B_2SH	apo	methane	methanol	0.995789	0.00421093	298	4.00E+06	FALSE	153.5510666	3.200912199	160.3096	3.3418	97.95797653	2.042023472	0.803112	3748.102285	13.13685
OPT_apo_sym_6_mc_3_sym_3_on_1_1B_2SH	apo	methane	methanol	0.995789	0.00421093	298	4.00E+06	TRUE	64.07916266	245.5369193	66.8996	256.3442	20.6963289	79.3036711	0.803112	3748.102285	13.13685
OPT_apo_sym_6_mc_3_sym_3_on_1_1B_2SH	apo	methane	methanol	0.997189	0.00281124	298	6.00E+06	FALSE	186.3446602	6.446268209	194.5466	6.73	96.65634257	3.343657435	0.803112	3748.102285	13.13685
OPT_apo_sym_6_mc_3_sym_3_on_1_1B_2SH	apo	methane	methanol	0.997189	0.00281124	298	6.00E+06	TRUE	109.4436497	180.6031712	114.2608	188.5524	37.7330975	62.2669025	0.803112	3748.102285	13.13685
OPT_apo_sym_6_mc_3_sym_3_on_1_1B_2SH	apo	methane	methanol	0.99789	0.00210991	298	8.00E+06	FALSE	211.7021529	0.97584815	221.0202	1.0188	99.54116169	0.458838312	0.803112	3748.102285	13.13685
OPT_apo_sym_6_mc_3_sym_3_on_1_1B_2SH	apo	methane	methanol	0.99789	0.00210991	298	8.00E+06	TRUE	149.4018921	124.5102931	155.9778	129.9906	54.54371882	45.45628118	0.803112	3748.102285	13.13685
OPT_apo_sym_6_mc_3_sym_3_on_1_1B_2SH	apo	methane	methanol	0.998311	0.00168864	298	1.00E+07	FALSE	228.6557425	0.511678526	238.72	0.5342	99.77672283	0.223277167	0.803112	3748.102285	13.13685
OPT_apo_sym_6_mc_3_sym_3_on_1_1B_2SH	apo	methane	methanol	0.998311	0.00168864	298	1.00E+07	TRUE	186.5661129	72.80739066	194.7778	76.012	71.92951876	28.07048124	0.803112	3748.102285	13.13685
OPT_apo_sym_6_mc_3_sym_3_on_1_1B_4Br	apo	methane	22-dimethylbutane	0.989153	0.0108468	298	4.00E+06	FALSE	37.62815714	94.58127919	39.1906	98.5086	28.46102229	71.53897771	0.775371	1809.624042	11.73619
OPT_apo_sym_6_mc_3_sym_3_on_1_1B_4Br	apo	methane	22-dimethylbutane	0.992743	0.00725744	298	6.00E+06	FALSE	66.68137357	81.60758881	69.4502	84.9962	44.96718603	55.03281397	0.775371	1809.624042	11.73619
OPT_apo_sym_6_mc_3_sym_3_on_1_1B_4Br	apo	methane	22-dimethylbutane	0.994547	0.00545297	298	8.00E+06	FALSE	96.10673724	68.13712601	100.0974	70.9664	58.51465944	41.48534056	0.775371	1809.624042	11.73619
OPT_apo_sym_6_mc_3_sym_3_on_1_1B_4Br	apo	methane	22-dimethylbutane	0.995633	0.00436714	298	1.00E+07	FALSE	138.7615705	47.63830347	144.5234	49.6164	74.44295296	25.55704704	0.775371	1809.624042	11.73619
OPT_apo_sym_6_mc_3_sym_3_on_1_1B_4Br	apo	methane	methanol	0.995789	0.00421093	298	4.00E+06	FALSE	150.087482	26.75542804	156.3196	27.8664	84.87051133	15.12948867	0.775371	1809.624042	11.73619
OPT_apo_sym_6_mc_3_sym_3_on_1_1B_4Br	apo	methane	methanol	0.995789	0.00421093	298	4.00E+06	TRUE	95.91336661	151.0718096	99.896	157.3448	38.83365314	61.16634686	0.775371	1809.624042	11.73619
OPT_apo_sym_6_mc_3_sym_3_on_1_1B_4Br	apo	methane	methanol	0.997189	0.00281124	298	6.00E+06	FALSE	182.8794532	13.53786407	190.4732	14.1	93.10760158	6.892398418	0.775371	1809.624042	11.73619
OPT_apo_sym_6_mc_3_sym_3_on_1_1B_4Br	apo	methane	methanol	0.997189	0.00281124	298	6.00E+06	TRUE	155.5312396	64.86480344	161.9894	67.5582	70.56898003	29.43101997	0.775371	1809.624042	11.73619
OPT_apo_sym_6_mc_3_sym_3_on_1_1B_4Br	apo	methane	methanol	0.99789	0.00210991	298	8.00E+06	FALSE	207.6762116	1.169825077	216.2996	1.2184	99.43986245	0.560137552	0.775371	1809.624042	11.73619
OPT_apo_sym_6_mc_3_sym_3_on_1_1B_4Br	apo	methane	methanol	0.99789	0.00210991	298	8.00E+06	TRUE	195.8569842	19.67022846	203.9896	20.487	90.87343625	9.126563749	0.775371	1809.624042	11.73619
OPT_apo_sym_6_mc_3_sym_3_on_1_1B_4Br	apo	methane	methanol	0.998311	0.00168864	298	1.00E+07	FALSE	221.4283772	0.503301301	230.6228	0.5242	99.77321791	0.226782091	0.775371	1809.624042	11.73619
OPT_apo_sym_6_mc_3_sym_3_on_1_1B_4Br	apo	methane	methanol	0.998311	0.00168864	298	1.00E+07	TRUE	216.2695868	8.288629287	225.2498	8.6328	96.30891738	3.69108262	0.775371	1809.624042	11.73619
OPT_apo_sym_6_mc_3_sym_3_on_1_1B_4CN	apo	methane	22-dimethylbutane	0.989153	0.0108468	298	4.00E+06	FALSE	44.86058238	84.37972552	47.8048	89.9176	34.71098383	65.28901617	0.737585	3228.64965	12.10219
OPT_apo_sym_6_mc_3_sym_3_on_1_1B_4CN	apo	methane	22-dimethylbutane	0.992743	0.00725744	298	6.00E+06	FALSE	80.86631221	65.98629367	86.1736	70.317	55.06631069	44.93368931	0.737585	3228.64965	12.10219
OPT_apo_sym_6_mc_3_sym_3_on_1_1B_4CN	apo	methane	22-dimethylbutane	0.994547	0.00545297	298	8.00E+06	FALSE	118.8976975	47.33873993	126.701	50.4456	71.52324685	28.47675315	0.737585	3228.64965	12.10219
OPT_apo_sym_6_mc_3_sym_3_on_1_1B_4CN	apo	methane	22-dimethylbutane	0.995633	0.00436714	298	1.00E+07	FALSE	150.1073929	31.90693532	159.959	34.001	82.47009693	17.52990307	0.737585	3228.64965	12.10219
OPT_apo_sym_6_mc_3_sym_3_on_1_1B_4CN	apo	methane	methanol	0.995789	0.00421093	298	4.00E+06	FALSE	132.0981468	8.949444451	140.7678	9.5368	93.65501788	6.344982123	0.737585	3228.64965	12.10219
OPT_apo_sym_6_mc_3_sym_3_on_1_1B_4CN	apo	methane	methanol	0.995789	0.00421093	298	4.00E+06	TRUE	34.49263485	266.1808466	36.7564	283.6504	11.47179149	88.52820851	0.737585	3228.64965	12.10219
OPT_apo_sym_6_mc_3_sym_3_on_1_1B_4CN	apo	methane	methanol	0.997189	0.00281124	298	6.00E+06	FALSE	160.8640306	11.83149438	171.4216	12.608	93.14892822	6.851071784	0.737585	3228.64965	12.10219
OPT_apo_sym_6_mc_3_sym_3_on_1_1B_4CN	apo	methane	methanol	0.997189	0.00281124	298	6.00E+06	TRUE	68.16059352	214.0408172	72.634	228.0884	24.15317249	75.84682751	0.737585	3228.64965	12.10219
OPT_apo_sym_6_mc_3_sym_3_on_1_1B_4CN	apo	methane	methanol	0.99789	0.00210991	298	8.00E+06	FALSE	183.596115	2.523952038	195.6456	2.6896	98.64391192	1.356088077	0.737585	3228.64965	12.10219
OPT_apo_sym_6_mc_3_sym_3_on_1_1B_4CN	apo	methane	methanol	0.99789	0.00210991	298	8.00E+06	TRUE	99.55515606	165.1005839	106.089	175.9362	37.61685126	62.38314874	0.737585	3228.64965	12.10219
OPT_apo_sym_6_mc_3_sym_3_on_1_1B_4CN	apo	methane	methanol	0.998311	0.00168864	298	1.00E+07	FALSE	199.23681	0.383059645	212.3128	0.4082	99.80810545	0.191894547	0.737585	3228.64965	12.10219
OPT_apo_sym_6_mc_3_sym_3_on_1_1B_4CN	apo	methane	methanol	0.998311	0.00168864	298	1.00E+07	TRUE	122.9878586	137.563081	131.0596	146.5914	47.20299945	52.79700055	0.737585	3228.64965	12.10219
OPT_apo_sym_6_mc_3_sym_3_on_1_1B_4F	apo	methane	22-dimethylbutane	0.989153	0.0108468	298	4.00E+06	FALSE	51.9781628	103.8151625	54.8638	109.5786	33.36353641	66.63646359	0.829577	3521.028523	14.21577
OPT_apo_sym_6_mc_3_sym_3_on_1_1B_4F	apo	methane	22-dimethylbutane	0.992743	0.00725744	298	6.00E+06	FALSE	86.43314822	86.56692161	91.2316	91.3728	49.96133719	50.03866281	0.829577	3521.028523	14.21577
OPT_apo_sym_6_mc_3_sym_3_on_1_1B_4F	apo	methane	22-dimethylbutane	0.994547	0.00545297	298	8.00E+06	FALSE	144.6476901	55.00056983	152.678	58.054	72.45126511	27.54873489	0.829577	3521.028523	14.21577
OPT_apo_sym_6_mc_3_sym_3_on_1_1B_4F	apo	methane	22-dimethylbutane	0.995633	0.00436714	298	1.00E+07	FALSE	189.5131255	29.0977969	200.0342	30.7132	86.68968751	13.31031249	0.829577	3521.028523	14.21577
OPT_apo_sym_6_mc_3_sym_3_on_1_1B_4F	apo	methane	methanol	0.995789	0.00421093	298	4.00E+06	FALSE	137.9726631	4.807694417	145.6324	5.0746	96.63280405	3.36719595	0.829577	3521.028523	14.21577
OPT_apo_sym_6_mc_3_sym_3_on_1_1B_4F	apo	methane	methanol	0.995789	0.00421093	298	4.00E+06	TRUE	104.4201744	140.7747041	110.2172	148.59	42.58660501	57.41339499	0.829577	3521.028523	14.21577
OPT_apo_sym_6_mc_3_sym_3_on_1_1B_4F	apo	methane	methanol	0.997189	0.00281124	298	6.00E+06	FALSE	176.5875084	0.933761009	186.391	0.9856	99.47400049	0.525999511	0.829577	3521.028523	14.21577
OPT_apo_sym_6_mc_3_sym_3_on_1_1B_4F	apo	methane	methanol	0.997189	0.00281124	298	6.00E+06	TRUE	152.9831366	75.31176659	161.4762	79.4928	67.01119231	32.98880769	0.829577	3521.028523	14.21577
OPT_apo_sym_6_mc_3_sym_3_on_1_1B_4F	apo	methane	methanol	0.99789	0.00210991	298	8.00E+06	FALSE	203.7575284	0.620359891	215.0694	0.6548	99.69646428	0.303535718	0.829577	3521.028523	14.21577
OPT_apo_sym_6_mc_3_sym_3_on_1_1B_4F	apo	methane	methanol	0.99789	0.00210991	298	8.00E+06	TRUE	188.0497658	41.30149243	198.4896	43.5944	81.99203582	18.00796418	0.829577	3521.028523	14.21577
OPT_apo_sym_6_mc_3_sym_3_on_1_1B_4F	apo	methane	methanol	0.998311	0.00168864	298	1.00E+07	FALSE	223.7740826	0.377066641	236.1972	0.398	99.83178019	0.168219812	0.829577	3521.028523	14.21577
OPT_apo_sym_6_mc_3_sym_3_on_1_1B_4F	apo	methane	methanol	0.998311	0.00168864	298	1.00E+07	TRUE	214.4455676	17.79318741	226.3508	18.781	92.33840734	7.661592662	0.829577	3521.028523	14.21577
OPT_apo_sym_6_mc_3_sym_3_on_1_1B_4H	apo	methane	22-dimethylbutane	0.989153	0.0108468	298	4.00E+06	FALSE	52.13869717	108.375447	27.4787	57.1172	32.48230706	67.51769294	0.862587	4624.657356	13.99825
OPT_apo_sym_6_mc_3_sym_3_on_1_1B_4H	apo	methane	22-dimethylbutane	0.992743	0.00725744	298	6.00E+06	FALSE	92.73252858	87.53757616	48.8729	46.135	51.44088018	48.55911982	0.862587	4624.657356	13.99825
OPT_apo_sym_6_mc_3_sym_3_on_1_1B_4H	apo	methane	22-dimethylbutane	0.994547	0.00545297	298	8.00E+06	FALSE	155.9288335	51.67572614	82.1793	27.2347	75.10857843	24.89142157	0.862587	4624.657356	13.99825
OPT_apo_sym_6_mc_3_sym_3_on_1_1B_4H	apo	methane	22-dimethylbutane	0.995633	0.00436714	298	1.00E+07	FALSE	202.2747005	24.75604777	106.605	13.0472	89.09572912	10.90427088	0.862587	4624.657356	13.99825
OPT_apo_sym_6_mc_3_sym_3_on_1_1B_4H	apo	methane	methanol	0.995789	0.00421093	298	4.00E+06	FALSE	133.7572646	2.798128613	70.4942	1.4747	97.95092047	2.049079533	0.862587	4624.657356	13.99825
OPT_apo_sym_6_mc_3_sym_3_on_1_1B_4H	apo	methane	methanol	0.995789	0.00421093	298	4.00E+06	TRUE	130.3855452	26.66789044	68.7172	14.0548	83.01986179	16.98013821	0.862587	4624.657356	13.99825
OPT_apo_sym_6_mc_3_sym_3_on_1_1B_4H	apo	methane	methanol	0.997189	0.00281124	298	6.00E+06	FALSE	175.0810343	0.918542118	92.2731	0.4841	99.47809981	0.521900187	0.862587	4624.657356	13.99825
OPT_apo_sym_6_mc_3_sym_3_on_1_1B_4H	apo	methane	methanol	0.997189	0.00281124	298	6.00E+06	TRUE	169.8375079	24.39345037	89.5096	12.8561	87.44100807	12.55899193	0.862587	4624.657356	13.99825
OPT_apo_sym_6_mc_3_sym_3_on_1_1B_4H	apo	methane	methanol	0.99789	0.00210991	298	8.00E+06	FALSE	205.1940744	0.592754715	108.1436	0.3124	99.71195692	0.288043077	0.862587	4624.657356	13.99825
OPT_apo_sym_6_mc_3_sym_3_on_1_1B_4H	apo	methane	methanol	0.99789	0.00210991	298	8.00E+06	TRUE	204.1269641	3.724450163	107.5812	1.9629	98.20811892	1.791881078	0.862587	4624.657356	13.99825
OPT_apo_sym_6_mc_3_sym_3_on_1_1B_4H	apo	methane	methanol	0.998311	0.00168864	298	1.00E+07	FALSE	225.2688019	0.387453626	118.7236	0.2042	99.82829919	0.171700813	0.862587	4624.657356	13.99825
OPT_apo_sym_6_mc_3_sym_3_on_1_1B_4H	apo	methane	methanol	0.998311	0.00168864	298	1.00E+07	TRUE	225.7052091	4.22707732	118.9536	2.2278	98.16159906	1.838400943	0.862587	4624.657356	13.99825
OPT_apo_sym_6_mc_3_sym_3_on_1_2B_2Br	apo	methane	22-dimethylbutane	0.989153	0.0108468	298	4.00E+06	FALSE	86.49668828	61.19334585	125.0782	88.4884	58.56636759	41.43363241	0.893697	3440.583832	18.98807
OPT_apo_sym_6_mc_3_sym_3_on_1_2B_2Br	apo	methane	22-dimethylbutane	0.992743	0.00725744	298	6.00E+06	FALSE	127.0884781	25.02257683	183.7758	36.1838	83.54979733	16.45020267	0.893697	3440.583832	18.98807
OPT_apo_sym_6_mc_3_sym_3_on_1_2B_2Br	apo	methane	22-dimethylbutane	0.994547	0.00545297	298	8.00E+06	FALSE	159.3655954	13.50938936	230.45	19.5352	92.18545738	7.814542621	0.893697	3440.583832	18.98807
OPT_apo_sym_6_mc_3_sym_3_on_1_2B_2Br	apo	methane	22-dimethylbutane	0.995633	0.00436714	298	1.00E+07	FALSE	184.9506716	8.799581059	267.4472	12.7246	95.45828667	4.541713334	0.893697	3440.583832	18.98807
OPT_apo_sym_6_mc_3_sym_3_on_1_2B_2Br	apo	methane	methanol	0.995789	0.00421093	298	4.00E+06	FALSE	99.34620934	0.886140481	143.6592	1.2814	99.11591369	0.884086308	0.893697	3440.583832	18.98807
OPT_apo_sym_6_mc_3_sym_3_on_1_2B_2Br	apo	methane	methanol	0.995789	0.00421093	298	4.00E+06	TRUE	94.6882666	20.97236021	136.9236	30.327	81.86732962	18.13267038	0.893697	3440.583832	18.98807
OPT_apo_sym_6_mc_3_sym_3_on_1_2B_2Br	apo	methane	methanol	0.997189	0.00281124	298	6.00E+06	FALSE	136.292334	0.512570099	197.085	0.7412	99.62532769	0.374672313	0.893697	3440.583832	18.98807
OPT_apo_sym_6_mc_3_sym_3_on_1_2B_2Br	apo	methane	methanol	0.997189	0.00281124	298	6.00E+06	TRUE	131.4065977	12.80125151	190.02	18.5112	91.12305497	8.876945033	0.893697	3440.583832	18.98807
OPT_apo_sym_6_mc_3_sym_3_on_1_2B_2Br	apo	methane	methanol	0.99789	0.00210991	298	8.00E+06	FALSE	164.8731653	0.402338483	238.4142	0.5818	99.75656496	0.243435037	0.893697	3440.583832	18.98807
OPT_apo_sym_6_mc_3_sym_3_on_1_2B_2Br	apo	methane	methanol	0.99789	0.00210991	298	8.00E+06	TRUE	161.8005108	4.914227789	233.971	7.1062	97.05231353	2.947686467	0.893697	3440.583832	18.98807
OPT_apo_sym_6_mc_3_sym_3_on_1_2B_2Br	apo	methane	methanol	0.998311	0.00168864	298	1.00E+07	FALSE	188.8901033	0.266796471	273.1438	0.3858	99.85895494	0.141045064	0.893697	3440.583832	18.98807
OPT_apo_sym_6_mc_3_sym_3_on_1_2B_2Br	apo	methane	methanol	0.998311	0.00168864	298	1.00E+07	TRUE	188.3844487	2.306288829	272.4126	3.335	98.79056064	1.209439357	0.893697	3440.583832	18.98807
OPT_apo_sym_6_mc_3_sym_3_on_1_2B_2CF3	apo	methane	22-dimethylbutane	0.989153	0.0108468	298	4.00E+06	FALSE	89.30360499	27.39786501	128.4488	39.4074	76.52311919	23.47688081	0.831423	3845.361571	18.74959
OPT_apo_sym_6_mc_3_sym_3_on_1_2B_2CF3	apo	methane	22-dimethylbutane	0.992743	0.00725744	298	6.00E+06	FALSE	121.5100743	15.62984118	174.7726	22.481	88.60299635	11.39700365	0.831423	3845.361571	18.74959
OPT_apo_sym_6_mc_3_sym_3_on_1_2B_2CF3	apo	methane	22-dimethylbutane	0.994547	0.00545297	298	8.00E+06	FALSE	149.535608	10.10318607	215.0828	14.5318	93.67122126	6.328778745	0.831423	3845.361571	18.74959
OPT_apo_sym_6_mc_3_sym_3_on_1_2B_2CF3	apo	methane	22-dimethylbutane	0.995633	0.00436714	298	1.00E+07	FALSE	172.9821079	6.740973004	248.8068	9.6958	96.24924469	3.750755312	0.831423	3845.361571	18.74959
OPT_apo_sym_6_mc_3_sym_3_on_1_2B_2CF3	apo	methane	methanol	0.995789	0.00421093	298	4.00E+06	FALSE	93.33492348	0.716382205	134.2472	1.0304	99.23830701	0.761692993	0.831423	3845.361571	18.74959
OPT_apo_sym_6_mc_3_sym_3_on_1_2B_2CF3	apo	methane	methanol	0.995789	0.00421093	298	4.00E+06	TRUE	84.1425106	35.93382596	121.0254	51.685	70.07418198	29.92581802	0.831423	3845.361571	18.74959
OPT_apo_sym_6_mc_3_sym_3_on_1_2B_2CF3	apo	methane	methanol	0.997189	0.00281124	298	6.00E+06	FALSE	126.4986085	0.437866375	181.9478	0.6298	99.65505078	0.344949216	0.831423	3845.361571	18.74959
OPT_apo_sym_6_mc_3_sym_3_on_1_2B_2CF3	apo	methane	methanol	0.997189	0.00281124	298	6.00E+06	TRUE	119.0347179	22.70703549	171.2122	32.6604	83.97999535	16.02000465	0.831423	3845.361571	18.74959
OPT_apo_sym_6_mc_3_sym_3_on_1_2B_2CF3	apo	methane	methanol	0.99789	0.00210991	298	8.00E+06	FALSE	153.3832424	0.30799429	220.617	0.443	99.79960192	0.200398082	0.831423	3845.361571	18.74959
OPT_apo_sym_6_mc_3_sym_3_on_1_2B_2CF3	apo	methane	methanol	0.99789	0.00210991	298	8.00E+06	TRUE	149.6097213	13.22943241	215.1894	19.0284	91.87576691	8.124233086	0.831423	3845.361571	18.74959
OPT_apo_sym_6_mc_3_sym_3_on_1_2B_2CF3	apo	methane	methanol	0.998311	0.00168864	298	1.00E+07	FALSE	176.7215619	0.230821906	254.1854	0.332	99.86955705	0.130442948	0.831423	3845.361571	18.74959
OPT_apo_sym_6_mc_3_sym_3_on_1_2B_2CF3	apo	methane	methanol	0.998311	0.00168864	298	1.00E+07	TRUE	170.8835753	12.22215898	245.7884	17.5796	93.32508126	6.674918745	0.831423	3845.361571	18.74959
OPT_apo_sym_6_mc_3_sym_3_on_1_2B_2CH3	apo	methane	22-dimethylbutane	0.989153	0.0108468	298	4.00E+06	FALSE	86.51219839	22.16339822	124.3914	31.8676	79.6059107	20.3940893	0.86477	6280.801486	19.22229
OPT_apo_sym_6_mc_3_sym_3_on_1_2B_2CH3	apo	methane	22-dimethylbutane	0.992743	0.00725744	298	6.00E+06	FALSE	119.9264374	13.46985124	172.436	19.3676	89.90237931	10.09762069	0.86477	6280.801486	19.22229
OPT_apo_sym_6_mc_3_sym_3_on_1_2B_2CH3	apo	methane	22-dimethylbutane	0.994547	0.00545297	298	8.00E+06	FALSE	147.3041555	8.527743653	211.801	12.2616	94.52760077	5.472399231	0.86477	6280.801486	19.22229
OPT_apo_sym_6_mc_3_sym_3_on_1_2B_2CH3	apo	methane	22-dimethylbutane	0.995633	0.00436714	298	1.00E+07	FALSE	172.0231784	5.761665648	247.3432	8.2844	96.75919189	3.240808113	0.86477	6280.801486	19.22229
OPT_apo_sym_6_mc_3_sym_3_on_1_2B_2CH3	apo	methane	methanol	0.995789	0.00421093	298	4.00E+06	FALSE	88.03516872	0.941267719	126.5812	1.3534	98.94211574	1.057884263	0.86477	6280.801486	19.22229
OPT_apo_sym_6_mc_3_sym_3_on_1_2B_2CH3	apo	methane	methanol	0.995789	0.00421093	298	4.00E+06	TRUE	81.80669438	26.31613174	117.6256	37.8386	75.6608917	24.3391083	0.86477	6280.801486	19.22229
OPT_apo_sym_6_mc_3_sym_3_on_1_2B_2CH3	apo	methane	methanol	0.997189	0.00281124	298	6.00E+06	FALSE	122.2439284	0.392948324	175.7682	0.565	99.67958388	0.320416121	0.86477	6280.801486	19.22229
OPT_apo_sym_6_mc_3_sym_3_on_1_2B_2CH3	apo	methane	methanol	0.997189	0.00281124	298	6.00E+06	TRUE	117.733438	13.55803858	169.2828	19.4944	89.67332919	10.32667081	0.86477	6280.801486	19.22229
OPT_apo_sym_6_mc_3_sym_3_on_1_2B_2CH3	apo	methane	methanol	0.99789	0.00210991	298	8.00E+06	FALSE	149.6532215	0.28904305	215.1786	0.4156	99.80723044	0.192769564	0.86477	6280.801486	19.22229
OPT_apo_sym_6_mc_3_sym_3_on_1_2B_2CH3	apo	methane	methanol	0.99789	0.00210991	298	8.00E+06	TRUE	146.8967411	7.578964709	211.2152	10.8974	95.09374975	4.906250253	0.86477	6280.801486	19.22229
OPT_apo_sym_6_mc_3_sym_3_on_1_2B_2CH3	apo	methane	methanol	0.998311	0.00168864	298	1.00E+07	FALSE	174.6957833	0.198212871	251.186	0.285	99.88666685	0.113333148	0.86477	6280.801486	19.22229
OPT_apo_sym_6_mc_3_sym_3_on_1_2B_2CH3	apo	methane	methanol	0.998311	0.00168864	298	1.00E+07	TRUE	172.6054374	4.979385517	248.1804	7.1596	97.19605232	2.803947678	0.86477	6280.801486	19.22229
OPT_apo_sym_6_mc_3_sym_3_on_1_2B_2CN	apo	methane	22-dimethylbutane	0.989153	0.0108468	298	4.00E+06	FALSE	89.2978352	23.19020367	130.9228	34	79.38429374	20.61570626	0.879978	5653.960962	19.81602
OPT_apo_sym_6_mc_3_sym_3_on_1_2B_2CN	apo	methane	22-dimethylbutane	0.992743	0.00725744	298	6.00E+06	FALSE	122.2696668	13.96705043	179.264	20.4776	89.74795436	10.25204564	0.879978	5653.960962	19.81602
OPT_apo_sym_6_mc_3_sym_3_on_1_2B_2CN	apo	methane	22-dimethylbutane	0.994547	0.00545297	298	8.00E+06	FALSE	150.7791575	8.737386678	221.0628	12.8102	94.52258277	5.477417231	0.879978	5653.960962	19.81602
OPT_apo_sym_6_mc_3_sym_3_on_1_2B_2CN	apo	methane	22-dimethylbutane	0.995633	0.00436714	298	1.00E+07	FALSE	175.4835451	5.900542704	257.2828	8.651	96.74693476	3.253065237	0.879978	5653.960962	19.81602
OPT_apo_sym_6_mc_3_sym_3_on_1_2B_2CN	apo	methane	methanol	0.995789	0.00421093	298	4.00E+06	FALSE	90.66237407	0.626408325	132.9234	0.9184	99.31381676	0.68618324	0.879978	5653.960962	19.81602
OPT_apo_sym_6_mc_3_sym_3_on_1_2B_2CN	apo	methane	methanol	0.995789	0.00421093	298	4.00E+06	TRUE	74.14903928	117.5827902	108.7126	172.3924	38.67330713	61.32669287	0.879978	5653.960962	19.81602
OPT_apo_sym_6_mc_3_sym_3_on_1_2B_2CN	apo	methane	methanol	0.997189	0.00281124	298	6.00E+06	FALSE	125.9500885	0.523689364	184.66	0.7678	99.58593048	0.414069519	0.879978	5653.960962	19.81602
OPT_apo_sym_6_mc_3_sym_3_on_1_2B_2CN	apo	methane	methanol	0.997189	0.00281124	298	6.00E+06	TRUE	108.21463	82.34063769	158.6574	120.7226	56.78910445	43.21089555	0.879978	5653.960962	19.81602
OPT_apo_sym_6_mc_3_sym_3_on_1_2B_2CN	apo	methane	methanol	0.99789	0.00210991	298	8.00E+06	FALSE	153.8383546	0.290832437	225.548	0.4264	99.81130606	0.188693941	0.879978	5653.960962	19.81602
OPT_apo_sym_6_mc_3_sym_3_on_1_2B_2CN	apo	methane	methanol	0.99789	0.00210991	298	8.00E+06	TRUE	138.0478721	62.48818639	202.397	91.6162	68.83942626	31.16057374	0.879978	5653.960962	19.81602
OPT_apo_sym_6_mc_3_sym_3_on_1_2B_2CN	apo	methane	methanol	0.998311	0.00168864	298	1.00E+07	FALSE	178.054793	0.240223227	261.0526	0.3522	99.86526644	0.134733563	0.879978	5653.960962	19.81602
OPT_apo_sym_6_mc_3_sym_3_on_1_2B_2CN	apo	methane	methanol	0.998311	0.00168864	298	1.00E+07	TRUE	164.1601779	44.81070337	240.6812	65.6986	78.55648447	21.44351553	0.879978	5653.960962	19.81602
OPT_apo_sym_6_mc_3_sym_3_on_1_2B_2F	apo	methane	22-dimethylbutane	0.989153	0.0108468	298	4.00E+06	FALSE	87.45750079	16.49422748	126.5884	23.8742	84.13280111	15.86719889	0.909997	5344.713363	20.8117
OPT_apo_sym_6_mc_3_sym_3_on_1_2B_2F	apo	methane	22-dimethylbutane	0.992743	0.00725744	298	6.00E+06	FALSE	121.4868368	10.39278238	175.8434	15.0428	92.11949318	7.880506815	0.909997	5344.713363	20.8117
OPT_apo_sym_6_mc_3_sym_3_on_1_2B_2F	apo	methane	22-dimethylbutane	0.994547	0.00545297	298	8.00E+06	FALSE	151.5733159	7.016585864	219.3914	10.156	95.57564146	4.424358542	0.909997	5344.713363	20.8117
OPT_apo_sym_6_mc_3_sym_3_on_1_2B_2F	apo	methane	22-dimethylbutane	0.995633	0.00436714	298	1.00E+07	FALSE	176.133439	4.979454604	254.9404	7.2074	97.25063495	2.749365053	0.909997	5344.713363	20.8117
OPT_apo_sym_6_mc_3_sym_3_on_1_2B_2F	apo	methane	methanol	0.995789	0.00421093	298	4.00E+06	FALSE	86.76026384	5.122881468	125.5792	7.415	94.42456889	5.575431109	0.909997	5344.713363	20.8117
OPT_apo_sym_6_mc_3_sym_3_on_1_2B_2F	apo	methane	methanol	0.995789	0.00421093	298	4.00E+06	TRUE	84.24766838	20.75737682	121.9424	30.0448	80.23201954	19.76798046	0.909997	5344.713363	20.8117
OPT_apo_sym_6_mc_3_sym_3_on_1_2B_2F	apo	methane	methanol	0.997189	0.00281124	298	6.00E+06	FALSE	121.1147284	0.385787864	175.3048	0.5584	99.68248047	0.317519527	0.909997	5344.713363	20.8117
OPT_apo_sym_6_mc_3_sym_3_on_1_2B_2F	apo	methane	methanol	0.997189	0.00281124	298	6.00E+06	TRUE	119.6481265	13.77671676	173.182	19.9408	89.67454904	10.32545096	0.909997	5344.713363	20.8117
OPT_apo_sym_6_mc_3_sym_3_on_1_2B_2F	apo	methane	methanol	0.99789	0.00210991	298	8.00E+06	FALSE	151.9903316	0.397947367	219.995	0.576	99.7388596	0.261140404	0.909997	5344.713363	20.8117
OPT_apo_sym_6_mc_3_sym_3_on_1_2B_2F	apo	methane	methanol	0.99789	0.00210991	298	8.00E+06	TRUE	150.9960158	7.605354521	218.5558	11.0082	95.20473593	4.795264066	0.909997	5344.713363	20.8117
OPT_apo_sym_6_mc_3_sym_3_on_1_2B_2F	apo	methane	methanol	0.998311	0.00168864	298	1.00E+07	FALSE	177.7838152	0.205467963	257.3292	0.2974	99.88456161	0.11543839	0.909997	5344.713363	20.8117
OPT_apo_sym_6_mc_3_sym_3_on_1_2B_2F	apo	methane	methanol	0.998311	0.00168864	298	1.00E+07	TRUE	176.6040671	4.435869555	255.6216	6.4206	97.54978397	2.450216034	0.909997	5344.713363	20.8117
OPT_apo_sym_6_mc_3_sym_3_on_1_2B_2NH2	apo	methane	22-dimethylbutane	0.989153	0.0108468	298	4.00E+06	FALSE	87.48188337	21.20454244	126.6062	30.6878	80.49016491	19.50983509	0.883309	6037.730858	20.12411
OPT_apo_sym_6_mc_3_sym_3_on_1_2B_2NH2	apo	methane	22-dimethylbutane	0.992743	0.00725744	298	6.00E+06	FALSE	120.7464497	12.48511253	174.7476	18.0688	90.62901288	9.370987115	0.883309	6037.730858	20.12411
OPT_apo_sym_6_mc_3_sym_3_on_1_2B_2NH2	apo	methane	22-dimethylbutane	0.994547	0.00545297	298	8.00E+06	FALSE	149.4034479	8.265734867	216.2208	11.9624	94.75754569	5.242454309	0.883309	6037.730858	20.12411
OPT_apo_sym_6_mc_3_sym_3_on_1_2B_2NH2	apo	methane	22-dimethylbutane	0.995633	0.00436714	298	1.00E+07	FALSE	173.8168843	5.271596372	251.5526	7.6292	97.05642912	2.943570883	0.883309	6037.730858	20.12411
OPT_apo_sym_6_mc_3_sym_3_on_1_2B_2NH2	apo	methane	methanol	0.995789	0.00421093	298	4.00E+06	FALSE	87.74749466	0.5480824	126.9906	0.7932	99.37926404	0.620735962	0.883309	6037.730858	20.12411
OPT_apo_sym_6_mc_3_sym_3_on_1_2B_2NH2	apo	methane	methanol	0.995789	0.00421093	298	4.00E+06	TRUE	82.44687729	34.28610571	119.3194	49.6198	70.62860485	29.37139515	0.883309	6037.730858	20.12411
OPT_apo_sym_6_mc_3_sym_3_on_1_2B_2NH2	apo	methane	methanol	0.997189	0.00281124	298	6.00E+06	FALSE	123.0971511	0.424535838	178.1496	0.6144	99.65630664	0.343693361	0.883309	6037.730858	20.12411
OPT_apo_sym_6_mc_3_sym_3_on_1_2B_2NH2	apo	methane	methanol	0.997189	0.00281124	298	6.00E+06	TRUE	118.6592867	18.68151158	171.727	27.0364	86.39769696	13.60230304	0.883309	6037.730858	20.12411
OPT_apo_sym_6_mc_3_sym_3_on_1_2B_2NH2	apo	methane	methanol	0.99789	0.00210991	298	8.00E+06	FALSE	153.0053692	0.291315607	221.4336	0.4216	99.80996614	0.19003386	0.883309	6037.730858	20.12411
OPT_apo_sym_6_mc_3_sym_3_on_1_2B_2NH2	apo	methane	methanol	0.99789	0.00210991	298	8.00E+06	TRUE	148.5206566	12.80890403	214.9432	18.5374	92.06041101	7.939588985	0.883309	6037.730858	20.12411
OPT_apo_sym_6_mc_3_sym_3_on_1_2B_2NH2	apo	methane	methanol	0.998311	0.00168864	298	1.00E+07	FALSE	176.7155299	0.206187327	255.7476	0.2984	99.88345844	0.116541559	0.883309	6037.730858	20.12411
OPT_apo_sym_6_mc_3_sym_3_on_1_2B_2NH2	apo	methane	methanol	0.998311	0.00168864	298	1.00E+07	TRUE	173.3432891	8.313550427	250.8672	12.0316	95.42348615	4.576513852	0.883309	6037.730858	20.12411
OPT_apo_sym_6_mc_3_sym_3_on_1_2B_2NO2	apo	methane	22-dimethylbutane	0.989153	0.0108468	298	4.00E+06	FALSE	89.90197711	27.426169	128.94	39.3354	76.62439073	23.37560927	0.855049	4581.160567	18.6015
OPT_apo_sym_6_mc_3_sym_3_on_1_2B_2NO2	apo	methane	22-dimethylbutane	0.992743	0.00725744	298	6.00E+06	FALSE	125.1146307	14.69221701	179.443	21.072	89.49106052	10.50893948	0.855049	4581.160567	18.6015
OPT_apo_sym_6_mc_3_sym_3_on_1_2B_2NO2	apo	methane	22-dimethylbutane	0.994547	0.00545297	298	8.00E+06	FALSE	152.4910168	9.487607906	218.707	13.6074	94.14267906	5.857320941	0.855049	4581.160567	18.6015
OPT_apo_sym_6_mc_3_sym_3_on_1_2B_2NO2	apo	methane	22-dimethylbutane	0.995633	0.00436714	298	1.00E+07	FALSE	176.0217124	6.051335965	252.4554	8.679	96.67642409	3.323575906	0.855049	4581.160567	18.6015
OPT_apo_sym_6_mc_3_sym_3_on_1_2B_2NO2	apo	methane	methanol	0.995789	0.00421093	298	4.00E+06	FALSE	91.99453034	1.948922029	131.9412	2.7952	97.92543069	2.074569307	0.855049	4581.160567	18.6015
OPT_apo_sym_6_mc_3_sym_3_on_1_2B_2NO2	apo	methane	methanol	0.995789	0.00421093	298	4.00E+06	TRUE	74.86643969	116.5054043	107.3756	167.0954	39.12092717	60.87907283	0.855049	4581.160567	18.6015
OPT_apo_sym_6_mc_3_sym_3_on_1_2B_2NO2	apo	methane	methanol	0.997189	0.00281124	298	6.00E+06	FALSE	126.8690231	0.418064414	181.9592	0.5996	99.67155788	0.328442124	0.855049	4581.160567	18.6015
OPT_apo_sym_6_mc_3_sym_3_on_1_2B_2NO2	apo	methane	methanol	0.997189	0.00281124	298	6.00E+06	TRUE	106.0650892	94.36444519	152.1216	135.3402	52.91889218	47.08110782	0.855049	4581.160567	18.6015
OPT_apo_sym_6_mc_3_sym_3_on_1_2B_2NO2	apo	methane	methanol	0.99789	0.00210991	298	8.00E+06	FALSE	156.2296115	0.314315273	224.069	0.4508	99.79921593	0.200784073	0.855049	4581.160567	18.6015
OPT_apo_sym_6_mc_3_sym_3_on_1_2B_2NO2	apo	methane	methanol	0.99789	0.00210991	298	8.00E+06	TRUE	135.3340605	73.66677053	194.1	105.655	64.75288152	35.24711848	0.855049	4581.160567	18.6015
OPT_apo_sym_6_mc_3_sym_3_on_1_2B_2NO2	apo	methane	methanol	0.998311	0.00168864	298	1.00E+07	FALSE	178.9258516	0.207079938	256.6206	0.297	99.88439873	0.115601267	0.855049	4581.160567	18.6015
OPT_apo_sym_6_mc_3_sym_3_on_1_2B_2NO2	apo	methane	methanol	0.998311	0.00168864	298	1.00E+07	TRUE	156.79563	65.51786121	224.8808	93.9676	70.52906648	29.47093352	0.855049	4581.160567	18.6015
OPT_apo_sym_6_mc_3_sym_3_on_1_2B_2OH	apo	methane	22-dimethylbutane	0.989153	0.0108468	298	4.00E+06	FALSE	87.54967314	19.07477548	126.5476	27.5714	82.11031735	17.88968265	0.897473	5743.80231	20.59969
OPT_apo_sym_6_mc_3_sym_3_on_1_2B_2OH	apo	methane	22-dimethylbutane	0.992743	0.00725744	298	6.00E+06	FALSE	122.8081967	12.66536755	177.5116	18.307	90.65104132	9.348958679	0.897473	5743.80231	20.59969
OPT_apo_sym_6_mc_3_sym_3_on_1_2B_2OH	apo	methane	22-dimethylbutane	0.994547	0.00545297	298	8.00E+06	FALSE	151.4814487	8.114773699	218.957	11.7294	94.91543498	5.08456502	0.897473	5743.80231	20.59969
OPT_apo_sym_6_mc_3_sym_3_on_1_2B_2OH	apo	methane	22-dimethylbutane	0.995633	0.00436714	298	1.00E+07	FALSE	176.5286711	5.699865087	255.1612	8.2388	96.87213364	3.127866363	0.897473	5743.80231	20.59969
OPT_apo_sym_6_mc_3_sym_3_on_1_2B_2OH	apo	methane	methanol	0.995789	0.00421093	298	4.00E+06	FALSE	88.32272616	0.719643597	127.665	1.0402	99.19179645	0.808203554	0.897473	5743.80231	20.59969
OPT_apo_sym_6_mc_3_sym_3_on_1_2B_2OH	apo	methane	methanol	0.995789	0.00421093	298	4.00E+06	TRUE	74.82342438	146.6401471	108.1526	211.9592	33.78588356	66.21411644	0.897473	5743.80231	20.59969
OPT_apo_sym_6_mc_3_sym_3_on_1_2B_2OH	apo	methane	methanol	0.997189	0.00281124	298	6.00E+06	FALSE	123.2079372	0.384658565	178.0894	0.556	99.68876892	0.311231076	0.897473	5743.80231	20.59969
OPT_apo_sym_6_mc_3_sym_3_on_1_2B_2OH	apo	methane	methanol	0.997189	0.00281124	298	6.00E+06	TRUE	110.7598049	94.39189115	160.0964	136.4376	53.98922215	46.01077785	0.897473	5743.80231	20.59969
OPT_apo_sym_6_mc_3_sym_3_on_1_2B_2OH	apo	methane	methanol	0.99789	0.00210991	298	8.00E+06	FALSE	153.2648531	0.366947667	221.5348	0.5304	99.76115123	0.238848771	0.897473	5743.80231	20.59969
OPT_apo_sym_6_mc_3_sym_3_on_1_2B_2OH	apo	methane	methanol	0.99789	0.00210991	298	8.00E+06	TRUE	141.0559563	73.40046442	203.8876	106.0958	65.77371562	34.22628438	0.897473	5743.80231	20.59969
OPT_apo_sym_6_mc_3_sym_3_on_1_2B_2OH	apo	methane	methanol	0.998311	0.00168864	298	1.00E+07	FALSE	178.1554447	0.213222608	257.5126	0.3082	99.88045961	0.119540394	0.897473	5743.80231	20.59969
OPT_apo_sym_6_mc_3_sym_3_on_1_2B_2OH	apo	methane	methanol	0.998311	0.00168864	298	1.00E+07	TRUE	167.2330786	50.57346916	241.725	73.1008	76.7805561	23.2194439	0.897473	5743.80231	20.59969
OPT_apo_sym_6_mc_3_sym_3_on_1_2B_2SH	apo	methane	22-dimethylbutane	0.989153	0.0108468	298	4.00E+06	FALSE	90.12065719	49.96683615	129.4804	71.7896	64.33169374	35.66830626	0.880015	5124.110936	18.8757
OPT_apo_sym_6_mc_3_sym_3_on_1_2B_2SH	apo	methane	22-dimethylbutane	0.992743	0.00725744	298	6.00E+06	FALSE	129.2159744	22.94408606	185.6504	32.9648	84.92108508	15.07891492	0.880015	5124.110936	18.8757
OPT_apo_sym_6_mc_3_sym_3_on_1_2B_2SH	apo	methane	22-dimethylbutane	0.994547	0.00545297	298	8.00E+06	FALSE	158.5652335	13.85799189	227.8178	19.9104	91.9628044	8.037195604	0.880015	5124.110936	18.8757
OPT_apo_sym_6_mc_3_sym_3_on_1_2B_2SH	apo	methane	22-dimethylbutane	0.995633	0.00436714	298	1.00E+07	FALSE	183.183103	9.133840985	263.1874	13.123	95.25063117	4.749368826	0.880015	5124.110936	18.8757
OPT_apo_sym_6_mc_3_sym_3_on_1_2B_2SH	apo	methane	methanol	0.995789	0.00421093	298	4.00E+06	FALSE	98.3734789	0.723440853	141.3376	1.0394	99.26996636	0.730033643	0.880015	5124.110936	18.8757
OPT_apo_sym_6_mc_3_sym_3_on_1_2B_2SH	apo	methane	methanol	0.995789	0.00421093	298	4.00E+06	TRUE	86.92885897	53.83655566	124.8946	77.3494	61.75441546	38.24558454	0.880015	5124.110936	18.8757
OPT_apo_sym_6_mc_3_sym_3_on_1_2B_2SH	apo	methane	methanol	0.997189	0.00281124	298	6.00E+06	FALSE	134.2898046	0.492362959	192.9402	0.7074	99.63469725	0.365302746	0.880015	5124.110936	18.8757
OPT_apo_sym_6_mc_3_sym_3_on_1_2B_2SH	apo	methane	methanol	0.997189	0.00281124	298	6.00E+06	TRUE	122.8748351	39.81834048	176.5398	57.2088	75.52550047	24.47449953	0.880015	5124.110936	18.8757
OPT_apo_sym_6_mc_3_sym_3_on_1_2B_2SH	apo	methane	methanol	0.99789	0.00210991	298	8.00E+06	FALSE	163.3180603	2.48826347	234.6464	3.575	98.49929519	1.500704807	0.880015	5124.110936	18.8757
OPT_apo_sym_6_mc_3_sym_3_on_1_2B_2SH	apo	methane	methanol	0.99789	0.00210991	298	8.00E+06	TRUE	155.3009102	23.6712854	223.1278	34.0096	86.77376375	13.22623625	0.880015	5124.110936	18.8757
OPT_apo_sym_6_mc_3_sym_3_on_1_2B_2SH	apo	methane	methanol	0.998311	0.00168864	298	1.00E+07	FALSE	187.6248099	0.247225506	269.569	0.3552	99.8684075	0.131592499	0.880015	5124.110936	18.8757
OPT_apo_sym_6_mc_3_sym_3_on_1_2B_2SH	apo	methane	methanol	0.998311	0.00168864	298	1.00E+07	TRUE	179.1697254	21.11759627	257.4212	30.3406	89.45634897	10.54365103	0.880015	5124.110936	18.8757
OPT_apo_sym_6_mc_3_sym_3_on_1_2B_4Br	apo	methane	22-dimethylbutane	0.989153	0.0108468	298	4.00E+06	FALSE	71.42020604	88.25075114	102.5914	126.7676	44.72961602	55.27038398	0.857705	2262.486678	17.96371
OPT_apo_sym_6_mc_3_sym_3_on_1_2B_4Br	apo	methane	22-dimethylbutane	0.992743	0.00725744	298	6.00E+06	FALSE	124.3619129	35.77783955	178.6394	51.393	77.65836465	22.34163535	0.857705	2262.486678	17.96371
OPT_apo_sym_6_mc_3_sym_3_on_1_2B_4Br	apo	methane	22-dimethylbutane	0.994547	0.00545297	298	8.00E+06	FALSE	156.5387863	20.59302077	224.8598	29.5808	88.37418242	11.62581758	0.857705	2262.486678	17.96371
OPT_apo_sym_6_mc_3_sym_3_on_1_2B_4Br	apo	methane	22-dimethylbutane	0.995633	0.00436714	298	1.00E+07	FALSE	181.3421932	12.65260013	260.4886	18.1748	93.47786613	6.522133872	0.857705	2262.486678	17.96371
OPT_apo_sym_6_mc_3_sym_3_on_1_2B_4Br	apo	methane	methanol	0.995789	0.00421093	298	4.00E+06	FALSE	105.3864935	1.664244221	151.3822	2.3906	98.44536875	1.554631248	0.857705	2262.486678	17.96371
OPT_apo_sym_6_mc_3_sym_3_on_1_2B_4Br	apo	methane	methanol	0.995789	0.00421093	298	4.00E+06	TRUE	100.2089996	16.89445275	143.945	24.268	85.57305321	14.42694679	0.857705	2262.486678	17.96371
OPT_apo_sym_6_mc_3_sym_3_on_1_2B_4Br	apo	methane	methanol	0.997189	0.00281124	298	6.00E+06	FALSE	140.8779322	0.670542974	202.3638	0.9632	99.52628033	0.473719673	0.857705	2262.486678	17.96371
OPT_apo_sym_6_mc_3_sym_3_on_1_2B_4Br	apo	methane	methanol	0.997189	0.00281124	298	6.00E+06	TRUE	136.2520767	8.680022857	195.719	12.4684	94.01097281	5.989027194	0.857705	2262.486678	17.96371
OPT_apo_sym_6_mc_3_sym_3_on_1_2B_4Br	apo	methane	methanol	0.99789	0.00210991	298	8.00E+06	FALSE	169.0399017	0.46252985	242.817	0.6644	99.72712495	0.272875053	0.857705	2262.486678	17.96371
OPT_apo_sym_6_mc_3_sym_3_on_1_2B_4Br	apo	methane	methanol	0.99789	0.00210991	298	8.00E+06	TRUE	167.0054387	4.410045298	239.8946	6.3348	97.42727717	2.572722835	0.857705	2262.486678	17.96371
OPT_apo_sym_6_mc_3_sym_3_on_1_2B_4Br	apo	methane	methanol	0.998311	0.00168864	298	1.00E+07	FALSE	191.5832891	0.276376205	275.1994	0.397	99.85594877	0.144051229	0.857705	2262.486678	17.96371
OPT_apo_sym_6_mc_3_sym_3_on_1_2B_4Br	apo	methane	methanol	0.998311	0.00168864	298	1.00E+07	TRUE	190.4692911	2.717119214	273.5992	3.903	98.59352466	1.406475336	0.857705	2262.486678	17.96371
OPT_apo_sym_6_mc_3_sym_3_on_1_2B_4CN	apo	methane	22-dimethylbutane	0.989153	0.0108468	298	4.00E+06	FALSE	85.63317593	22.26636082	124.7672	32.442	79.36380314	20.63619686	0.825568	4570.866413	17.68392
OPT_apo_sym_6_mc_3_sym_3_on_1_2B_4CN	apo	methane	22-dimethylbutane	0.992743	0.00725744	298	6.00E+06	FALSE	117.7491173	13.1451282	171.56	19.1524	89.95744377	10.04255623	0.825568	4570.866413	17.68392
OPT_apo_sym_6_mc_3_sym_3_on_1_2B_4CN	apo	methane	22-dimethylbutane	0.994547	0.00545297	298	8.00E+06	FALSE	143.7817202	8.242026402	209.4894	12.0086	94.57846121	5.421538795	0.825568	4570.866413	17.68392
OPT_apo_sym_6_mc_3_sym_3_on_1_2B_4CN	apo	methane	22-dimethylbutane	0.995633	0.00436714	298	1.00E+07	FALSE	166.0646906	5.56116809	241.9556	8.1026	96.75971434	3.240285661	0.825568	4570.866413	17.68392
OPT_apo_sym_6_mc_3_sym_3_on_1_2B_4CN	apo	methane	methanol	0.995789	0.00421093	298	4.00E+06	FALSE	87.68493165	0.613042152	127.7566	0.8932	99.3057121	0.694287904	0.825568	4570.866413	17.68392
OPT_apo_sym_6_mc_3_sym_3_on_1_2B_4CN	apo	methane	methanol	0.995789	0.00421093	298	4.00E+06	TRUE	71.8029395	96.44391209	104.6166	140.5184	42.67713709	57.32286291	0.825568	4570.866413	17.68392
OPT_apo_sym_6_mc_3_sym_3_on_1_2B_4CN	apo	methane	methanol	0.997189	0.00281124	298	6.00E+06	FALSE	118.3237242	0.507345229	172.3972	0.7392	99.57305338	0.426946616	0.825568	4570.866413	17.68392
OPT_apo_sym_6_mc_3_sym_3_on_1_2B_4CN	apo	methane	methanol	0.997189	0.00281124	298	6.00E+06	TRUE	101.9751556	86.13242231	148.5774	125.4946	54.21108322	45.78891678	0.825568	4570.866413	17.68392
OPT_apo_sym_6_mc_3_sym_3_on_1_2B_4CN	apo	methane	methanol	0.99789	0.00210991	298	8.00E+06	FALSE	146.2396541	0.290048828	213.0706	0.4226	99.80205459	0.197945415	0.825568	4570.866413	17.68392
OPT_apo_sym_6_mc_3_sym_3_on_1_2B_4CN	apo	methane	methanol	0.99789	0.00210991	298	8.00E+06	TRUE	128.5337724	66.93086044	187.2732	97.518	65.75807118	34.24192882	0.825568	4570.866413	17.68392
OPT_apo_sym_6_mc_3_sym_3_on_1_2B_4CN	apo	methane	methanol	0.998311	0.00168864	298	1.00E+07	FALSE	169.7782216	0.220453582	247.3662	0.3212	99.87032041	0.129679588	0.825568	4570.866413	17.68392
OPT_apo_sym_6_mc_3_sym_3_on_1_2B_4CN	apo	methane	methanol	0.998311	0.00168864	298	1.00E+07	TRUE	151.3687003	56.74373612	220.5436	82.6754	72.73409648	27.26590352	0.825568	4570.866413	17.68392
OPT_apo_sym_6_mc_3_sym_3_on_1_2B_4F	apo	methane	22-dimethylbutane	0.989153	0.0108468	298	4.00E+06	FALSE	87.84764547	18.96206451	127.8146	27.589	82.24687202	17.75312798	0.897658	4572.027832	20.15963
OPT_apo_sym_6_mc_3_sym_3_on_1_2B_4F	apo	methane	22-dimethylbutane	0.992743	0.00725744	298	6.00E+06	FALSE	122.8668101	11.16417408	178.766	16.2434	91.67045281	8.329547191	0.897658	4572.027832	20.15963
OPT_apo_sym_6_mc_3_sym_3_on_1_2B_4F	apo	methane	22-dimethylbutane	0.994547	0.00545297	298	8.00E+06	FALSE	151.3693588	7.666340208	220.236	11.1542	95.1794847	4.820515303	0.897658	4572.027832	20.15963
OPT_apo_sym_6_mc_3_sym_3_on_1_2B_4F	apo	methane	22-dimethylbutane	0.995633	0.00436714	298	1.00E+07	FALSE	176.5256931	5.317955633	256.8374	7.7374	97.07553403	2.924465973	0.897658	4572.027832	20.15963
OPT_apo_sym_6_mc_3_sym_3_on_1_2B_4F	apo	methane	methanol	0.995789	0.00421093	298	4.00E+06	FALSE	88.65701613	0.613351204	128.9922	0.8924	99.31292855	0.687071446	0.897658	4572.027832	20.15963
OPT_apo_sym_6_mc_3_sym_3_on_1_2B_4F	apo	methane	methanol	0.995789	0.00421093	298	4.00E+06	TRUE	82.86619449	31.37039856	120.5668	45.6426	72.53909827	27.46090173	0.897658	4572.027832	20.15963
OPT_apo_sym_6_mc_3_sym_3_on_1_2B_4F	apo	methane	methanol	0.997189	0.00281124	298	6.00E+06	FALSE	124.0532365	0.463106277	180.4922	0.6738	99.62807591	0.371924092	0.897658	4572.027832	20.15963
OPT_apo_sym_6_mc_3_sym_3_on_1_2B_4F	apo	methane	methanol	0.997189	0.00281124	298	6.00E+06	TRUE	118.3345819	24.35658595	172.1718	35.4378	82.93055812	17.06944188	0.897658	4572.027832	20.15963
OPT_apo_sym_6_mc_3_sym_3_on_1_2B_4F	apo	methane	methanol	0.99789	0.00210991	298	8.00E+06	FALSE	153.4083186	3.111018479	223.2026	4.5264	98.01237436	1.987625643	0.897658	4572.027832	20.15963
OPT_apo_sym_6_mc_3_sym_3_on_1_2B_4F	apo	methane	methanol	0.99789	0.00210991	298	8.00E+06	TRUE	148.7681834	15.39110136	216.4514	22.3934	90.62428824	9.375711759	0.897658	4572.027832	20.15963
OPT_apo_sym_6_mc_3_sym_3_on_1_2B_4F	apo	methane	methanol	0.998311	0.00168864	298	1.00E+07	FALSE	177.7431857	0.231072025	258.6088	0.3362	99.87016548	0.129834521	0.897658	4572.027832	20.15963
OPT_apo_sym_6_mc_3_sym_3_on_1_2B_4F	apo	methane	methanol	0.998311	0.00168864	298	1.00E+07	TRUE	175.6994148	10.71618852	255.6352	15.5916	94.25145303	5.748546972	0.897658	4572.027832	20.15963
OPT_apo_sym_6_mc_3_sym_3_on_1_2B_4H	apo	methane	22-dimethylbutane	0.989153	0.0108468	298	4.00E+06	FALSE	85.40376793	13.02267771	124.3858	18.9668	86.76912731	13.23087269	0.92311	6466.837938	21.56268
OPT_apo_sym_6_mc_3_sym_3_on_1_2B_4H	apo	methane	22-dimethylbutane	0.992743	0.00725744	298	6.00E+06	FALSE	120.04609	8.558379545	174.8404	12.4648	93.34519277	6.654807234	0.92311	6466.837938	21.56268
OPT_apo_sym_6_mc_3_sym_3_on_1_2B_4H	apo	methane	22-dimethylbutane	0.994547	0.00545297	298	8.00E+06	FALSE	148.6933994	5.659950095	216.5636	8.2434	96.3331213	3.6668787	0.92311	6466.837938	21.56268
OPT_apo_sym_6_mc_3_sym_3_on_1_2B_4H	apo	methane	22-dimethylbutane	0.995633	0.00436714	298	1.00E+07	FALSE	174.9686298	3.920782568	254.832	5.7104	97.8082646	2.191735395	0.92311	6466.837938	21.56268
OPT_apo_sym_6_mc_3_sym_3_on_1_2B_4H	apo	methane	methanol	0.995789	0.00421093	298	4.00E+06	FALSE	83.9826353	1.520827506	122.316	2.215	98.22132642	1.778673583	0.92311	6466.837938	21.56268
OPT_apo_sym_6_mc_3_sym_3_on_1_2B_4H	apo	methane	methanol	0.995789	0.00421093	298	4.00E+06	TRUE	82.93419123	2.301633393	120.789	3.3522	97.29968777	2.700312225	0.92311	6466.837938	21.56268
OPT_apo_sym_6_mc_3_sym_3_on_1_2B_4H	apo	methane	methanol	0.997189	0.00281124	298	6.00E+06	FALSE	119.3479512	0.378318716	173.8236	0.551	99.68401361	0.315986388	0.92311	6466.837938	21.56268
OPT_apo_sym_6_mc_3_sym_3_on_1_2B_4H	apo	methane	methanol	0.997189	0.00281124	298	6.00E+06	TRUE	118.4994462	1.656225783	172.5878	2.4122	98.6216	1.3784	0.92311	6466.837938	21.56268
OPT_apo_sym_6_mc_3_sym_3_on_1_2B_4H	apo	methane	methanol	0.99789	0.00210991	298	8.00E+06	FALSE	149.8577422	0.263655875	218.2594	0.384	99.82437156	0.175628443	0.92311	6466.837938	21.56268
OPT_apo_sym_6_mc_3_sym_3_on_1_2B_4H	apo	methane	methanol	0.99789	0.00210991	298	8.00E+06	TRUE	149.1152488	1.221330911	217.178	1.7788	99.1876023	0.812397697	0.92311	6466.837938	21.56268
OPT_apo_sym_6_mc_3_sym_3_on_1_2B_4H	apo	methane	methanol	0.998311	0.00168864	298	1.00E+07	FALSE	174.7783032	0.230424249	254.5548	0.3356	99.86833557	0.131664433	0.92311	6466.837938	21.56268
OPT_apo_sym_6_mc_3_sym_3_on_1_2B_4H	apo	methane	methanol	0.998311	0.00168864	298	1.00E+07	TRUE	175.4651817	0.795224568	255.5552	1.1582	99.54883539	0.451164606	0.92311	6466.837938	21.56268
OPT_apo_sym_6_mc_3_sym_3_on_1_ntn_edge	apo	methane	22-dimethylbutane	0.989153	0.0108468	298	4.00E+06	FALSE	37.56156841	86.93395921	33.735	78.0776	30.17101829	69.82898171	0.732222	1653.938916	6.83371
OPT_apo_sym_6_mc_3_sym_3_on_1_ntn_edge	apo	methane	22-dimethylbutane	0.992743	0.00725744	298	6.00E+06	FALSE	41.3688317	86.87405666	37.1544	78.0238	32.25818775	67.74181225	0.732222	1653.938916	6.83371
OPT_apo_sym_6_mc_3_sym_3_on_1_ntn_edge	apo	methane	22-dimethylbutane	0.994547	0.00545297	298	8.00E+06	FALSE	48.40259308	84.65966665	43.4716	76.035	36.3758989	63.6241011	0.732222	1653.938916	6.83371
OPT_apo_sym_6_mc_3_sym_3_on_1_ntn_edge	apo	methane	22-dimethylbutane	0.995633	0.00436714	298	1.00E+07	FALSE	65.09157593	76.68127107	58.4604	68.8694	45.91258291	54.08741709	0.732222	1653.938916	6.83371
OPT_apo_sym_6_mc_3_sym_3_on_1_ntn_edge	apo	methane	methanol	0.995789	0.00421093	298	4.00E+06	FALSE	132.7649739	82.54414923	119.2396	74.135	61.66249342	38.33750658	0.732222	1653.938916	6.83371
OPT_apo_sym_6_mc_3_sym_3_on_1_ntn_edge	apo	methane	methanol	0.995789	0.00421093	298	4.00E+06	TRUE	8.436906136	275.2749117	7.5774	247.2314	2.973759148	97.02624085	0.732222	1653.938916	6.83371
OPT_apo_sym_6_mc_3_sym_3_on_1_ntn_edge	apo	methane	methanol	0.997189	0.00281124	298	6.00E+06	FALSE	197.8046639	9.952952721	177.6534	8.939	95.209344	4.790655997	0.732222	1653.938916	6.83371
OPT_apo_sym_6_mc_3_sym_3_on_1_ntn_edge	apo	methane	methanol	0.997189	0.00281124	298	6.00E+06	TRUE	15.78420946	261.3741808	14.1762	234.7468	5.695014121	94.30498588	0.732222	1653.938916	6.83371
OPT_apo_sym_6_mc_3_sym_3_on_1_ntn_edge	apo	methane	methanol	0.99789	0.00210991	298	8.00E+06	FALSE	212.1612332	1.318524065	190.5474	1.1842	99.38236577	0.617634235	0.732222	1653.938916	6.83371
OPT_apo_sym_6_mc_3_sym_3_on_1_ntn_edge	apo	methane	methanol	0.99789	0.00210991	298	8.00E+06	TRUE	27.28483018	252.6549087	24.5052	226.9158	9.746679872	90.25332013	0.732222	1653.938916	6.83371
OPT_apo_sym_6_mc_3_sym_3_on_1_ntn_edge	apo	methane	methanol	0.998311	0.00168864	298	1.00E+07	FALSE	218.503109	0.66249098	196.2432	0.595	99.69772128	0.302278724	0.732222	1653.938916	6.83371
OPT_apo_sym_6_mc_3_sym_3_on_1_ntn_edge	apo	methane	methanol	0.998311	0.00168864	298	1.00E+07	TRUE	44.63853088	232.5316617	40.091	208.8426	16.10509791	83.89490209	0.732222	1653.938916	6.83371
OPT_apo_sym_6_mc_3_sym_3_on_2_1B_2Br	apo	methane	22-dimethylbutane	0.989153	0.0108468	298	4.00E+06	FALSE	51.68749157	98.60014198	55.1532	105.2114	34.39237837	65.60762163	0.817757	2820.831743	12.26133
OPT_apo_sym_6_mc_3_sym_3_on_2_1B_2Br	apo	methane	22-dimethylbutane	0.992743	0.00725744	298	6.00E+06	FALSE	80.00497057	86.0603501	85.3694	91.8308	48.17680793	51.82319207	0.817757	2820.831743	12.26133
OPT_apo_sym_6_mc_3_sym_3_on_2_1B_2Br	apo	methane	22-dimethylbutane	0.994547	0.00545297	298	8.00E+06	FALSE	124.3422994	64.54966724	132.6796	68.8778	65.82720357	34.17279643	0.817757	2820.831743	12.26133
OPT_apo_sym_6_mc_3_sym_3_on_2_1B_2Br	apo	methane	22-dimethylbutane	0.995633	0.00436714	298	1.00E+07	FALSE	167.6562471	42.05702587	178.8978	44.877	79.94546303	20.05453697	0.817757	2820.831743	12.26133
OPT_apo_sym_6_mc_3_sym_3_on_2_1B_2Br	apo	methane	methanol	0.995789	0.00421093	298	4.00E+06	FALSE	149.0991245	14.62122902	159.0964	15.6016	91.06938832	8.930611684	0.817757	2820.831743	12.26133
OPT_apo_sym_6_mc_3_sym_3_on_2_1B_2Br	apo	methane	methanol	0.995789	0.00421093	298	4.00E+06	TRUE	117.1051584	98.73584306	124.9572	105.3562	54.25528866	45.74471134	0.817757	2820.831743	12.26133
OPT_apo_sym_6_mc_3_sym_3_on_2_1B_2Br	apo	methane	methanol	0.997189	0.00281124	298	6.00E+06	FALSE	187.6453535	1.881259303	200.2272	2.0074	99.00739043	0.992609573	0.817757	2820.831743	12.26133
OPT_apo_sym_6_mc_3_sym_3_on_2_1B_2Br	apo	methane	methanol	0.997189	0.00281124	298	6.00E+06	TRUE	168.9311625	44.56543409	180.2582	47.5536	79.12592763	20.87407237	0.817757	2820.831743	12.26133
OPT_apo_sym_6_mc_3_sym_3_on_2_1B_2Br	apo	methane	methanol	0.99789	0.00210991	298	8.00E+06	FALSE	212.6512764	2.669600105	226.9098	2.8486	98.76017591	1.239824093	0.817757	2820.831743	12.26133
OPT_apo_sym_6_mc_3_sym_3_on_2_1B_2Br	apo	methane	methanol	0.99789	0.00210991	298	8.00E+06	TRUE	201.1217453	22.93591906	214.6072	24.4738	89.76338563	10.23661437	0.817757	2820.831743	12.26133
OPT_apo_sym_6_mc_3_sym_3_on_2_1B_2Br	apo	methane	methanol	0.998311	0.00168864	298	1.00E+07	FALSE	230.5617571	0.42959513	246.0212	0.4584	99.81402112	0.18597888	0.817757	2820.831743	12.26133
OPT_apo_sym_6_mc_3_sym_3_on_2_1B_2Br	apo	methane	methanol	0.998311	0.00168864	298	1.00E+07	TRUE	227.0882593	5.373875209	242.3148	5.7342	97.68827933	2.311720668	0.817757	2820.831743	12.26133
OPT_apo_sym_6_mc_3_sym_3_on_2_1B_2CF3	apo	methane	22-dimethylbutane	0.989153	0.0108468	298	4.00E+06	FALSE	48.97399226	87.17852583	52.3516	93.191	35.96994969	64.03005031	0.730958	3035.589763	11.15986
OPT_apo_sym_6_mc_3_sym_3_on_2_1B_2CF3	apo	methane	22-dimethylbutane	0.992743	0.00725744	298	6.00E+06	FALSE	86.38785623	67.30383135	92.3458	71.9456	56.20854165	43.79145835	0.730958	3035.589763	11.15986
OPT_apo_sym_6_mc_3_sym_3_on_2_1B_2CF3	apo	methane	22-dimethylbutane	0.994547	0.00545297	298	8.00E+06	FALSE	129.873	45.00006369	138.83	48.1036	74.26701246	25.73298754	0.730958	3035.589763	11.15986
OPT_apo_sym_6_mc_3_sym_3_on_2_1B_2CF3	apo	methane	22-dimethylbutane	0.995633	0.00436714	298	1.00E+07	FALSE	161.5164353	29.05907205	172.6558	31.0632	84.75193772	15.24806228	0.730958	3035.589763	11.15986
OPT_apo_sym_6_mc_3_sym_3_on_2_1B_2CF3	apo	methane	methanol	0.995789	0.00421093	298	4.00E+06	FALSE	130.2331606	25.65335539	139.215	27.4226	83.54357	16.45643	0.730958	3035.589763	11.15986
OPT_apo_sym_6_mc_3_sym_3_on_2_1B_2CF3	apo	methane	methanol	0.995789	0.00421093	298	4.00E+06	TRUE	107.5559485	85.17921317	114.9738	91.0538	55.80504748	44.19495252	0.730958	3035.589763	11.15986
OPT_apo_sym_6_mc_3_sym_3_on_2_1B_2CF3	apo	methane	methanol	0.997189	0.00281124	298	6.00E+06	FALSE	168.726384	6.986929786	180.363	7.4688	96.0236765	3.976323498	0.730958	3035.589763	11.15986
OPT_apo_sym_6_mc_3_sym_3_on_2_1B_2CF3	apo	methane	methanol	0.997189	0.00281124	298	6.00E+06	TRUE	148.7858316	43.3500601	159.0472	46.3398	77.43781252	22.56218748	0.730958	3035.589763	11.15986
OPT_apo_sym_6_mc_3_sym_3_on_2_1B_2CF3	apo	methane	methanol	0.99789	0.00210991	298	8.00E+06	FALSE	189.7459217	0.595527997	202.8322	0.6366	99.68712648	0.312873522	0.730958	3035.589763	11.15986
OPT_apo_sym_6_mc_3_sym_3_on_2_1B_2CF3	apo	methane	methanol	0.99789	0.00210991	298	8.00E+06	TRUE	179.855255	19.31172126	192.2594	20.6436	90.30375335	9.696246648	0.730958	3035.589763	11.15986
OPT_apo_sym_6_mc_3_sym_3_on_2_1B_2CF3	apo	methane	methanol	0.998311	0.00168864	298	1.00E+07	FALSE	205.6160038	0.35192842	219.7968	0.3762	99.82913436	0.170865637	0.730958	3035.589763	11.15986
OPT_apo_sym_6_mc_3_sym_3_on_2_1B_2CF3	apo	methane	methanol	0.998311	0.00168864	298	1.00E+07	TRUE	198.9497573	11.38294795	212.6708	12.168	94.58812269	5.411877309	0.730958	3035.589763	11.15986
OPT_apo_sym_6_mc_3_sym_3_on_2_1B_2CH3	apo	methane	22-dimethylbutane	0.989153	0.0108468	298	4.00E+06	FALSE	52.85009426	92.60799963	56.4582	98.9304	36.33355343	63.66644657	0.776158	4490.170932	12.31015
OPT_apo_sym_6_mc_3_sym_3_on_2_1B_2CH3	apo	methane	22-dimethylbutane	0.992743	0.00725744	298	6.00E+06	FALSE	91.76738862	71.81364214	98.0324	76.7164	56.09904045	43.90095955	0.776158	4490.170932	12.31015
OPT_apo_sym_6_mc_3_sym_3_on_2_1B_2CH3	apo	methane	22-dimethylbutane	0.994547	0.00545297	298	8.00E+06	FALSE	138.399208	45.50944455	147.8478	48.6164	75.25432114	24.74567886	0.776158	4490.170932	12.31015
OPT_apo_sym_6_mc_3_sym_3_on_2_1B_2CH3	apo	methane	22-dimethylbutane	0.995633	0.00436714	298	1.00E+07	FALSE	177.4297696	25.3696029	189.543	27.1016	87.49029517	12.50970483	0.776158	4490.170932	12.31015
OPT_apo_sym_6_mc_3_sym_3_on_2_1B_2CH3	apo	methane	methanol	0.995789	0.00421093	298	4.00E+06	FALSE	132.2923281	6.2935367	141.324	6.7232	95.45874559	4.541254411	0.776158	4490.170932	12.31015
OPT_apo_sym_6_mc_3_sym_3_on_2_1B_2CH3	apo	methane	methanol	0.995789	0.00421093	298	4.00E+06	TRUE	114.7683032	57.00859132	122.6036	60.9006	66.81242173	33.18757827	0.776158	4490.170932	12.31015
OPT_apo_sym_6_mc_3_sym_3_on_2_1B_2CH3	apo	methane	methanol	0.997189	0.00281124	298	6.00E+06	FALSE	167.217001	4.918978559	178.633	5.2548	97.14238791	2.857612087	0.776158	4490.170932	12.31015
OPT_apo_sym_6_mc_3_sym_3_on_2_1B_2CH3	apo	methane	methanol	0.997189	0.00281124	298	6.00E+06	TRUE	158.3048393	26.27705091	169.1124	28.071	85.76401462	14.23598538	0.776158	4490.170932	12.31015
OPT_apo_sym_6_mc_3_sym_3_on_2_1B_2CH3	apo	methane	methanol	0.99789	0.00210991	298	8.00E+06	FALSE	193.1596797	0.615761608	206.3468	0.6578	99.68222928	0.317770716	0.776158	4490.170932	12.31015
OPT_apo_sym_6_mc_3_sym_3_on_2_1B_2CH3	apo	methane	methanol	0.99789	0.00210991	298	8.00E+06	TRUE	188.9901368	10.12159313	201.8926	10.8126	94.91662639	5.083373608	0.776158	4490.170932	12.31015
OPT_apo_sym_6_mc_3_sym_3_on_2_1B_2CH3	apo	methane	methanol	0.998311	0.00168864	298	1.00E+07	FALSE	209.8816606	0.332874472	224.2104	0.3556	99.84165012	0.158349884	0.776158	4490.170932	12.31015
OPT_apo_sym_6_mc_3_sym_3_on_2_1B_2CH3	apo	methane	methanol	0.998311	0.00168864	298	1.00E+07	TRUE	208.4808919	2.831679634	222.714	3.025	98.65995685	1.340043147	0.776158	4490.170932	12.31015
OPT_apo_sym_6_mc_3_sym_3_on_2_1B_2CN	apo	methane	22-dimethylbutane	0.989153	0.0108468	298	4.00E+06	FALSE	45.39757368	99.63554113	48.716	106.9186	31.30152293	68.69847707	0.798999	4141.851833	12.24848
OPT_apo_sym_6_mc_3_sym_3_on_2_1B_2CN	apo	methane	22-dimethylbutane	0.992743	0.00725744	298	6.00E+06	FALSE	90.1564353	77.26067654	96.7466	82.9082	53.8513861	46.1486139	0.798999	4141.851833	12.24848
OPT_apo_sym_6_mc_3_sym_3_on_2_1B_2CN	apo	methane	22-dimethylbutane	0.994547	0.00545297	298	8.00E+06	FALSE	138.0850011	51.6821873	148.1786	55.46	72.76547766	27.23452234	0.798999	4141.851833	12.24848
OPT_apo_sym_6_mc_3_sym_3_on_2_1B_2CN	apo	methane	22-dimethylbutane	0.995633	0.00436714	298	1.00E+07	FALSE	174.3350326	32.72565303	187.0784	35.1178	84.19513925	15.80486075	0.798999	4141.851833	12.24848
OPT_apo_sym_6_mc_3_sym_3_on_2_1B_2CN	apo	methane	methanol	0.995789	0.00421093	298	4.00E+06	FALSE	136.0641213	20.69058068	146.01	22.203	86.80066344	13.19933656	0.798999	4141.851833	12.24848
OPT_apo_sym_6_mc_3_sym_3_on_2_1B_2CN	apo	methane	methanol	0.995789	0.00421093	298	4.00E+06	TRUE	48.4345778	273.9743013	51.975	294.001	15.02271834	84.97728166	0.798999	4141.851833	12.24848
OPT_apo_sym_6_mc_3_sym_3_on_2_1B_2CN	apo	methane	methanol	0.997189	0.00281124	298	6.00E+06	FALSE	177.5854378	1.067564258	190.5664	1.1456	99.40243699	0.597563011	0.798999	4141.851833	12.24848
OPT_apo_sym_6_mc_3_sym_3_on_2_1B_2CN	apo	methane	methanol	0.997189	0.00281124	298	6.00E+06	TRUE	85.76372894	215.8516896	92.0328	231.6298	28.43479599	71.56520401	0.798999	4141.851833	12.24848
OPT_apo_sym_6_mc_3_sym_3_on_2_1B_2CN	apo	methane	methanol	0.99789	0.00210991	298	8.00E+06	FALSE	201.0179886	1.085456397	215.7118	1.1648	99.46292039	0.537079611	0.798999	4141.851833	12.24848
OPT_apo_sym_6_mc_3_sym_3_on_2_1B_2CN	apo	methane	methanol	0.99789	0.00210991	298	8.00E+06	TRUE	134.9963707	142.3030727	144.8642	152.705	48.68252494	51.31747506	0.798999	4141.851833	12.24848
OPT_apo_sym_6_mc_3_sym_3_on_2_1B_2CN	apo	methane	methanol	0.998311	0.00168864	298	1.00E+07	FALSE	218.0514908	0.39754095	233.9904	0.4266	99.81801661	0.181983389	0.798999	4141.851833	12.24848
OPT_apo_sym_6_mc_3_sym_3_on_2_1B_2CN	apo	methane	methanol	0.998311	0.00168864	298	1.00E+07	TRUE	165.4497221	104.2999843	177.5436	111.924	61.33453278	38.66546722	0.798999	4141.851833	12.24848
OPT_apo_sym_6_mc_3_sym_3_on_2_1B_2F	apo	methane	22-dimethylbutane	0.989153	0.0108468	298	4.00E+06	FALSE	50.97758763	105.6485262	54.7712	113.5106	32.54731052	67.45268948	0.839811	4227.927268	13.29184
OPT_apo_sym_6_mc_3_sym_3_on_2_1B_2F	apo	methane	22-dimethylbutane	0.992743	0.00725744	298	6.00E+06	FALSE	88.45315836	85.74638874	95.0356	92.1274	50.77691638	49.22308362	0.839811	4227.927268	13.29184
OPT_apo_sym_6_mc_3_sym_3_on_2_1B_2F	apo	methane	22-dimethylbutane	0.994547	0.00545297	298	8.00E+06	FALSE	145.8779619	53.48946091	156.7338	57.47	73.17041061	26.82958939	0.839811	4227.927268	13.29184
OPT_apo_sym_6_mc_3_sym_3_on_2_1B_2F	apo	methane	22-dimethylbutane	0.995633	0.00436714	298	1.00E+07	FALSE	190.1901689	28.56767213	204.3436	30.6936	86.94096084	13.05903916	0.839811	4227.927268	13.29184
OPT_apo_sym_6_mc_3_sym_3_on_2_1B_2F	apo	methane	methanol	0.995789	0.00421093	298	4.00E+06	FALSE	134.6865929	1.611105913	144.7096	1.731	98.81795076	1.18204924	0.839811	4227.927268	13.29184
OPT_apo_sym_6_mc_3_sym_3_on_2_1B_2F	apo	methane	methanol	0.995789	0.00421093	298	4.00E+06	TRUE	123.1072927	56.42314423	132.2686	60.622	68.57182258	31.42817742	0.839811	4227.927268	13.29184
OPT_apo_sym_6_mc_3_sym_3_on_2_1B_2F	apo	methane	methanol	0.997189	0.00281124	298	6.00E+06	FALSE	173.4769228	5.028586382	186.3866	5.4028	97.18295172	2.817048283	0.839811	4227.927268	13.29184
OPT_apo_sym_6_mc_3_sym_3_on_2_1B_2F	apo	methane	methanol	0.997189	0.00281124	298	6.00E+06	TRUE	169.2443028	19.37478183	181.839	20.8166	89.72809042	10.27190958	0.839811	4227.927268	13.29184
OPT_apo_sym_6_mc_3_sym_3_on_2_1B_2F	apo	methane	methanol	0.99789	0.00210991	298	8.00E+06	FALSE	201.8513739	0.605351407	216.8726	0.6504	99.70099714	0.299002864	0.839811	4227.927268	13.29184
OPT_apo_sym_6_mc_3_sym_3_on_2_1B_2F	apo	methane	methanol	0.99789	0.00210991	298	8.00E+06	TRUE	197.767858	12.32146997	212.4852	13.2384	94.13512809	5.864871905	0.839811	4227.927268	13.29184
OPT_apo_sym_6_mc_3_sym_3_on_2_1B_2F	apo	methane	methanol	0.998311	0.00168864	298	1.00E+07	FALSE	223.1738162	0.476537393	239.7818	0.512	99.7869275	0.213072497	0.839811	4227.927268	13.29184
OPT_apo_sym_6_mc_3_sym_3_on_2_1B_2F	apo	methane	methanol	0.998311	0.00168864	298	1.00E+07	TRUE	218.7870661	9.174833998	235.0686	9.8576	95.97527745	4.024722549	0.839811	4227.927268	13.29184
OPT_apo_sym_6_mc_3_sym_3_on_2_1B_2NH2	apo	methane	22-dimethylbutane	0.989153	0.0108468	298	4.00E+06	FALSE	57.56721661	95.11929581	61.0982	100.9536	37.70288266	62.29711734	0.803895	4467.180869	12.83316
OPT_apo_sym_6_mc_3_sym_3_on_2_1B_2NH2	apo	methane	22-dimethylbutane	0.992743	0.00725744	298	6.00E+06	FALSE	91.66892988	78.87883233	97.2916	83.717	53.74971134	46.25028866	0.803895	4467.180869	12.83316
OPT_apo_sym_6_mc_3_sym_3_on_2_1B_2NH2	apo	methane	22-dimethylbutane	0.994547	0.00545297	298	8.00E+06	FALSE	142.7543204	50.26510413	151.5104	53.3482	73.95852554	26.04147446	0.803895	4467.180869	12.83316
OPT_apo_sym_6_mc_3_sym_3_on_2_1B_2NH2	apo	methane	22-dimethylbutane	0.995633	0.00436714	298	1.00E+07	FALSE	181.5369233	29.14569887	192.6718	30.9334	86.16606412	13.83393588	0.803895	4467.180869	12.83316
OPT_apo_sym_6_mc_3_sym_3_on_2_1B_2NH2	apo	methane	methanol	0.995789	0.00421093	298	4.00E+06	FALSE	137.4967994	2.255269217	145.9304	2.3936	98.38623554	1.613764462	0.803895	4467.180869	12.83316
OPT_apo_sym_6_mc_3_sym_3_on_2_1B_2NH2	apo	methane	methanol	0.995789	0.00421093	298	4.00E+06	TRUE	70.56384618	237.594911	74.892	252.1682	22.89853672	77.10146328	0.803895	4467.180869	12.83316
OPT_apo_sym_6_mc_3_sym_3_on_2_1B_2NH2	apo	methane	methanol	0.997189	0.00281124	298	6.00E+06	FALSE	172.943232	5.33515893	183.551	5.6624	97.00740011	2.99259989	0.803895	4467.180869	12.83316
OPT_apo_sym_6_mc_3_sym_3_on_2_1B_2NH2	apo	methane	methanol	0.997189	0.00281124	298	6.00E+06	TRUE	122.4146865	143.1969697	129.9232	151.9802	46.08784428	53.91215572	0.803895	4467.180869	12.83316
OPT_apo_sym_6_mc_3_sym_3_on_2_1B_2NH2	apo	methane	methanol	0.99789	0.00210991	298	8.00E+06	FALSE	200.384288	0.529332489	212.6752	0.5618	99.73653728	0.26346272	0.803895	4467.180869	12.83316
OPT_apo_sym_6_mc_3_sym_3_on_2_1B_2NH2	apo	methane	methanol	0.99789	0.00210991	298	8.00E+06	TRUE	177.2074772	59.24020125	188.0768	62.8738	74.94574629	25.05425371	0.803895	4467.180869	12.83316
OPT_apo_sym_6_mc_3_sym_3_on_2_1B_2NH2	apo	methane	methanol	0.998311	0.00168864	298	1.00E+07	FALSE	217.3843596	0.334106979	230.718	0.3546	99.84654174	0.153458264	0.803895	4467.180869	12.83316
OPT_apo_sym_6_mc_3_sym_3_on_2_1B_2NH2	apo	methane	methanol	0.998311	0.00168864	298	1.00E+07	TRUE	198.5164548	40.43090171	210.6928	42.9108	83.07957773	16.92042227	0.803895	4467.180869	12.83316
OPT_apo_sym_6_mc_3_sym_3_on_2_1B_2NO2	apo	methane	22-dimethylbutane	0.989153	0.0108468	298	4.00E+06	FALSE	53.71326024	90.75796811	57.2742	96.7748	37.17920921	62.82079079	0.770341	3554.789806	11.4382
OPT_apo_sym_6_mc_3_sym_3_on_2_1B_2NO2	apo	methane	22-dimethylbutane	0.992743	0.00725744	298	6.00E+06	FALSE	82.41637687	77.20975193	87.8802	82.3284	51.63088117	48.36911883	0.770341	3554.789806	11.4382
OPT_apo_sym_6_mc_3_sym_3_on_2_1B_2NO2	apo	methane	22-dimethylbutane	0.994547	0.00545297	298	8.00E+06	FALSE	126.5257315	54.91086463	134.9138	58.5512	69.73550771	30.26449229	0.770341	3554.789806	11.4382
OPT_apo_sym_6_mc_3_sym_3_on_2_1B_2NO2	apo	methane	22-dimethylbutane	0.995633	0.00436714	298	1.00E+07	FALSE	166.3623487	34.62849178	177.3914	36.9242	82.77110952	17.22889048	0.770341	3554.789806	11.4382
OPT_apo_sym_6_mc_3_sym_3_on_2_1B_2NO2	apo	methane	methanol	0.995789	0.00421093	298	4.00E+06	FALSE	140.70548	8.776742709	150.0336	9.3586	94.12857091	5.871429091	0.770341	3554.789806	11.4382
OPT_apo_sym_6_mc_3_sym_3_on_2_1B_2NO2	apo	methane	methanol	0.995789	0.00421093	298	4.00E+06	TRUE	33.22587852	298.4837155	35.4286	318.2718	10.01655639	89.98344361	0.770341	3554.789806	11.4382
OPT_apo_sym_6_mc_3_sym_3_on_2_1B_2NO2	apo	methane	methanol	0.997189	0.00281124	298	6.00E+06	FALSE	176.3353828	5.679477042	188.0256	6.056	96.87966299	3.120337013	0.770341	3554.789806	11.4382
OPT_apo_sym_6_mc_3_sym_3_on_2_1B_2NO2	apo	methane	methanol	0.997189	0.00281124	298	6.00E+06	TRUE	80.81832059	216.6307848	86.1762	230.9924	27.17047022	72.82952978	0.770341	3554.789806	11.4382
OPT_apo_sym_6_mc_3_sym_3_on_2_1B_2NO2	apo	methane	methanol	0.99789	0.00210991	298	8.00E+06	FALSE	197.8560618	2.955091176	210.973	3.151	98.52842278	1.471577217	0.770341	3554.789806	11.4382
OPT_apo_sym_6_mc_3_sym_3_on_2_1B_2NO2	apo	methane	methanol	0.99789	0.00210991	298	8.00E+06	TRUE	121.4948552	158.6243426	129.5494	169.1404	43.37255574	56.62744426	0.770341	3554.789806	11.4382
OPT_apo_sym_6_mc_3_sym_3_on_2_1B_2NO2	apo	methane	methanol	0.998311	0.00168864	298	1.00E+07	FALSE	215.4127358	0.377568933	229.6936	0.4026	99.8250297	0.174970295	0.770341	3554.789806	11.4382
OPT_apo_sym_6_mc_3_sym_3_on_2_1B_2NO2	apo	methane	methanol	0.998311	0.00168864	298	1.00E+07	TRUE	156.1724891	111.4533597	166.526	118.8422	58.35478515	41.64521485	0.770341	3554.789806	11.4382
OPT_apo_sym_6_mc_3_sym_3_on_2_1B_2OH	apo	methane	22-dimethylbutane	0.989153	0.0108468	298	4.00E+06	FALSE	53.53509758	101.2872569	57.5034	108.7952	34.57840295	65.42159705	0.819451	4396.123238	13.01075
OPT_apo_sym_6_mc_3_sym_3_on_2_1B_2OH	apo	methane	22-dimethylbutane	0.992743	0.00725744	298	6.00E+06	FALSE	94.72638329	79.75159332	101.748	85.6632	54.29131237	45.70868763	0.819451	4396.123238	13.01075
OPT_apo_sym_6_mc_3_sym_3_on_2_1B_2OH	apo	methane	22-dimethylbutane	0.994547	0.00545297	298	8.00E+06	FALSE	144.5883524	52.72960492	155.306	56.6382	73.27683419	26.72316581	0.819451	4396.123238	13.01075
OPT_apo_sym_6_mc_3_sym_3_on_2_1B_2OH	apo	methane	22-dimethylbutane	0.995633	0.00436714	298	1.00E+07	FALSE	186.3626241	28.81172381	200.1768	30.9474	86.61005641	13.38994359	0.819451	4396.123238	13.01075
OPT_apo_sym_6_mc_3_sym_3_on_2_1B_2OH	apo	methane	methanol	0.995789	0.00421093	298	4.00E+06	FALSE	133.2887391	5.367530469	143.1688	5.7654	96.12889451	3.871105495	0.819451	4396.123238	13.01075
OPT_apo_sym_6_mc_3_sym_3_on_2_1B_2OH	apo	methane	methanol	0.995789	0.00421093	298	4.00E+06	TRUE	35.14915979	332.6826182	37.7546	357.3428	9.555770299	90.4442297	0.819451	4396.123238	13.01075
OPT_apo_sym_6_mc_3_sym_3_on_2_1B_2OH	apo	methane	methanol	0.997189	0.00281124	298	6.00E+06	FALSE	175.5061621	1.008262306	188.5156	1.083	99.42879325	0.571206749	0.819451	4396.123238	13.01075
OPT_apo_sym_6_mc_3_sym_3_on_2_1B_2OH	apo	methane	methanol	0.997189	0.00281124	298	6.00E+06	TRUE	89.11418861	235.7462506	95.7198	253.221	27.43152993	72.56847007	0.819451	4396.123238	13.01075
OPT_apo_sym_6_mc_3_sym_3_on_2_1B_2OH	apo	methane	methanol	0.99789	0.00210991	298	8.00E+06	FALSE	203.3520768	0.616687859	218.4256	0.6624	99.69765574	0.302344263	0.819451	4396.123238	13.01075
OPT_apo_sym_6_mc_3_sym_3_on_2_1B_2OH	apo	methane	methanol	0.99789	0.00210991	298	8.00E+06	TRUE	137.5796726	160.6648761	147.7778	172.5742	46.1298197	53.8701803	0.819451	4396.123238	13.01075
OPT_apo_sym_6_mc_3_sym_3_on_2_1B_2OH	apo	methane	methanol	0.998311	0.00168864	298	1.00E+07	FALSE	222.1707388	0.351914267	238.6392	0.378	99.84185239	0.158147614	0.819451	4396.123238	13.01075
OPT_apo_sym_6_mc_3_sym_3_on_2_1B_2OH	apo	methane	methanol	0.998311	0.00168864	298	1.00E+07	TRUE	164.2955514	125.1451823	176.474	134.4216	56.76310633	43.23689367	0.819451	4396.123238	13.01075
OPT_apo_sym_6_mc_3_sym_3_on_2_1B_2SH	apo	methane	22-dimethylbutane	0.989153	0.0108468	298	4.00E+06	FALSE	51.42392814	95.95053313	54.8362	102.3174	34.8933782	65.1066218	0.799444	3860.565403	11.72231
OPT_apo_sym_6_mc_3_sym_3_on_2_1B_2SH	apo	methane	22-dimethylbutane	0.992743	0.00725744	298	6.00E+06	FALSE	85.60764306	79.25385336	91.2882	84.5128	51.92700838	48.07299162	0.799444	3860.565403	11.72231
OPT_apo_sym_6_mc_3_sym_3_on_2_1B_2SH	apo	methane	22-dimethylbutane	0.994547	0.00545297	298	8.00E+06	FALSE	126.7261921	58.52324766	135.1352	62.4066	68.40840774	31.59159226	0.799444	3860.565403	11.72231
OPT_apo_sym_6_mc_3_sym_3_on_2_1B_2SH	apo	methane	22-dimethylbutane	0.995633	0.00436714	298	1.00E+07	FALSE	167.6875703	39.06876397	178.8146	41.6612	81.10395789	18.89604211	0.799444	3860.565403	11.72231
OPT_apo_sym_6_mc_3_sym_3_on_2_1B_2SH	apo	methane	methanol	0.995789	0.00421093	298	4.00E+06	FALSE	145.4822222	19.52612958	155.1358	20.8218	88.16658104	11.83341896	0.799444	3860.565403	11.72231
OPT_apo_sym_6_mc_3_sym_3_on_2_1B_2SH	apo	methane	methanol	0.995789	0.00421093	298	4.00E+06	TRUE	62.68302278	244.8109901	66.8424	261.0556	20.38511976	79.61488024	0.799444	3860.565403	11.72231
OPT_apo_sym_6_mc_3_sym_3_on_2_1B_2SH	apo	methane	methanol	0.997189	0.00281124	298	6.00E+06	FALSE	183.7756351	1.566456639	195.9702	1.6704	99.15482952	0.845170476	0.799444	3860.565403	11.72231
OPT_apo_sym_6_mc_3_sym_3_on_2_1B_2SH	apo	methane	methanol	0.997189	0.00281124	298	6.00E+06	TRUE	127.7198567	127.468721	136.1948	135.927	50.04920591	49.95079409	0.799444	3860.565403	11.72231
OPT_apo_sym_6_mc_3_sym_3_on_2_1B_2SH	apo	methane	methanol	0.99789	0.00210991	298	8.00E+06	FALSE	205.2688381	3.145854551	218.8896	3.3546	98.49057928	1.509420718	0.799444	3860.565403	11.72231
OPT_apo_sym_6_mc_3_sym_3_on_2_1B_2SH	apo	methane	methanol	0.99789	0.00210991	298	8.00E+06	TRUE	162.2850579	93.0863857	173.0536	99.2632	63.54863159	36.45136841	0.799444	3860.565403	11.72231
OPT_apo_sym_6_mc_3_sym_3_on_2_1B_2SH	apo	methane	methanol	0.998311	0.00168864	298	1.00E+07	FALSE	224.5719652	0.416371377	239.4736	0.444	99.81493646	0.185063538	0.799444	3860.565403	11.72231
OPT_apo_sym_6_mc_3_sym_3_on_2_1B_2SH	apo	methane	methanol	0.998311	0.00168864	298	1.00E+07	TRUE	190.8985865	56.72441078	203.5658	60.4884	77.09243027	22.90756973	0.799444	3860.565403	11.72231
OPT_apo_sym_6_mc_3_sym_3_on_2_1B_4Br	apo	methane	22-dimethylbutane	0.989153	0.0108468	298	4.00E+06	FALSE	43.32859371	89.64573612	46.055	95.2866	32.58417904	67.41582096	0.774771	1837.170553	11.96252
OPT_apo_sym_6_mc_3_sym_3_on_2_1B_4Br	apo	methane	22-dimethylbutane	0.992743	0.00725744	298	6.00E+06	FALSE	66.72951527	79.54322597	70.9284	84.5484	45.61992529	54.38007471	0.774771	1837.170553	11.96252
OPT_apo_sym_6_mc_3_sym_3_on_2_1B_4Br	apo	methane	22-dimethylbutane	0.994547	0.00545297	298	8.00E+06	FALSE	101.1839087	64.46481891	107.5508	68.5212	61.08342042	38.91657958	0.774771	1837.170553	11.96252
OPT_apo_sym_6_mc_3_sym_3_on_2_1B_4Br	apo	methane	22-dimethylbutane	0.995633	0.00436714	298	1.00E+07	FALSE	137.1242034	47.77143272	145.7526	50.7774	74.16302855	25.83697145	0.774771	1837.170553	11.96252
OPT_apo_sym_6_mc_3_sym_3_on_2_1B_4Br	apo	methane	methanol	0.995789	0.00421093	298	4.00E+06	FALSE	146.9442851	33.69159193	156.1906	35.8116	81.34833872	18.65166128	0.774771	1837.170553	11.96252
OPT_apo_sym_6_mc_3_sym_3_on_2_1B_4Br	apo	methane	methanol	0.995789	0.00421093	298	4.00E+06	TRUE	113.5554429	96.53879747	120.7008	102.6134	54.04976486	45.95023514	0.774771	1837.170553	11.96252
OPT_apo_sym_6_mc_3_sym_3_on_2_1B_4Br	apo	methane	methanol	0.997189	0.00281124	298	6.00E+06	FALSE	180.5011543	15.76650897	191.859	16.7586	91.9668331	8.033166904	0.774771	1837.170553	11.96252
OPT_apo_sym_6_mc_3_sym_3_on_2_1B_4Br	apo	methane	methanol	0.997189	0.00281124	298	6.00E+06	TRUE	169.1227297	30.99186915	179.7646	32.942	84.51293942	15.48706058	0.774771	1837.170553	11.96252
OPT_apo_sym_6_mc_3_sym_3_on_2_1B_4Br	apo	methane	methanol	0.99789	0.00210991	298	8.00E+06	FALSE	200.6284644	13.14186212	213.2528	13.9688	93.85234502	6.147654976	0.774771	1837.170553	11.96252
OPT_apo_sym_6_mc_3_sym_3_on_2_1B_4Br	apo	methane	methanol	0.99789	0.00210991	298	8.00E+06	TRUE	198.7144987	14.92750257	211.2184	15.8668	93.01284276	6.987157243	0.774771	1837.170553	11.96252
OPT_apo_sym_6_mc_3_sym_3_on_2_1B_4Br	apo	methane	methanol	0.998311	0.00168864	298	1.00E+07	FALSE	218.0116459	4.490255391	231.7298	4.7728	97.98192493	2.018075066	0.774771	1837.170553	11.96252
OPT_apo_sym_6_mc_3_sym_3_on_2_1B_4Br	apo	methane	methanol	0.998311	0.00168864	298	1.00E+07	TRUE	219.5205027	4.381310626	233.3336	4.657	98.04320003	1.956799974	0.774771	1837.170553	11.96252
OPT_apo_sym_6_mc_3_sym_3_on_2_1B_4CN	apo	methane	22-dimethylbutane	0.989153	0.0108468	298	4.00E+06	FALSE	44.54533345	83.86645392	48.1776	90.705	34.68944274	65.31055726	0.733797	3302.956812	11.77171
OPT_apo_sym_6_mc_3_sym_3_on_2_1B_4CN	apo	methane	22-dimethylbutane	0.992743	0.00725744	298	6.00E+06	FALSE	78.45805928	67.82767073	84.8556	73.3584	53.6334332	46.3665668	0.733797	3302.956812	11.77171
OPT_apo_sym_6_mc_3_sym_3_on_2_1B_4CN	apo	methane	22-dimethylbutane	0.994547	0.00545297	298	8.00E+06	FALSE	118.6030044	46.90086157	128.274	50.7252	71.66177279	28.33822721	0.733797	3302.956812	11.77171
OPT_apo_sym_6_mc_3_sym_3_on_2_1B_4CN	apo	methane	22-dimethylbutane	0.995633	0.00436714	298	1.00E+07	FALSE	149.3814983	31.76985727	161.5622	34.3604	82.46225805	17.53774195	0.733797	3302.956812	11.77171
OPT_apo_sym_6_mc_3_sym_3_on_2_1B_4CN	apo	methane	methanol	0.995789	0.00421093	298	4.00E+06	FALSE	132.8972396	5.012847876	143.7338	5.4216	96.36513328	3.634866723	0.733797	3302.956812	11.77171
OPT_apo_sym_6_mc_3_sym_3_on_2_1B_4CN	apo	methane	methanol	0.995789	0.00421093	298	4.00E+06	TRUE	28.81037603	285.9011621	31.1596	309.2138	9.154534403	90.8454656	0.733797	3302.956812	11.77171
OPT_apo_sym_6_mc_3_sym_3_on_2_1B_4CN	apo	methane	methanol	0.997189	0.00281124	298	6.00E+06	FALSE	164.4302126	2.845014924	177.838	3.077	98.29920128	1.700798718	0.733797	3302.956812	11.77171
OPT_apo_sym_6_mc_3_sym_3_on_2_1B_4CN	apo	methane	methanol	0.997189	0.00281124	298	6.00E+06	TRUE	59.62067642	231.4209293	64.4822	250.2912	20.48527607	79.51472393	0.733797	3302.956812	11.77171
OPT_apo_sym_6_mc_3_sym_3_on_2_1B_4CN	apo	methane	methanol	0.99789	0.00210991	298	8.00E+06	FALSE	185.1500948	1.120068599	200.2474	1.2114	99.39868598	0.601314016	0.733797	3302.956812	11.77171
OPT_apo_sym_6_mc_3_sym_3_on_2_1B_4CN	apo	methane	methanol	0.99789	0.00210991	298	8.00E+06	TRUE	83.45333963	193.1087397	90.2582	208.855	30.17526475	69.82473525	0.733797	3302.956812	11.77171
OPT_apo_sym_6_mc_3_sym_3_on_2_1B_4CN	apo	methane	methanol	0.998311	0.00168864	298	1.00E+07	FALSE	199.1928369	0.351720402	215.4352	0.3804	99.82373841	0.176261586	0.733797	3302.956812	11.77171
OPT_apo_sym_6_mc_3_sym_3_on_2_1B_4CN	apo	methane	methanol	0.998311	0.00168864	298	1.00E+07	TRUE	112.9151936	152.3555883	122.1224	164.7788	42.56601227	57.43398773	0.733797	3302.956812	11.77171
OPT_apo_sym_6_mc_3_sym_3_on_2_1B_4F	apo	methane	22-dimethylbutane	0.989153	0.0108468	298	4.00E+06	FALSE	57.1902688	98.65205368	61.1344	105.4556	36.69752086	63.30247914	0.821199	3655.091487	13.27675
OPT_apo_sym_6_mc_3_sym_3_on_2_1B_4F	apo	methane	22-dimethylbutane	0.992743	0.00725744	298	6.00E+06	FALSE	101.8534679	75.72408291	108.8778	80.9464	57.35717574	42.64282426	0.821199	3655.091487	13.27675
OPT_apo_sym_6_mc_3_sym_3_on_2_1B_4F	apo	methane	22-dimethylbutane	0.994547	0.00545297	298	8.00E+06	FALSE	154.2841799	46.09523841	164.9244	49.2742	76.99602145	23.00397855	0.821199	3655.091487	13.27675
OPT_apo_sym_6_mc_3_sym_3_on_2_1B_4F	apo	methane	22-dimethylbutane	0.995633	0.00436714	298	1.00E+07	FALSE	188.1945488	28.81534739	201.1734	30.8026	86.72164362	13.27835638	0.821199	3655.091487	13.27675
OPT_apo_sym_6_mc_3_sym_3_on_2_1B_4F	apo	methane	methanol	0.995789	0.00421093	298	4.00E+06	FALSE	135.8169723	23.16464828	145.1836	24.7622	85.42935454	14.57064546	0.821199	3655.091487	13.27675
OPT_apo_sym_6_mc_3_sym_3_on_2_1B_4F	apo	methane	methanol	0.995789	0.00421093	298	4.00E+06	TRUE	97.85614367	162.3738736	104.6048	173.572	37.60371102	62.39628898	0.821199	3655.091487	13.27675
OPT_apo_sym_6_mc_3_sym_3_on_2_1B_4F	apo	methane	methanol	0.997189	0.00281124	298	6.00E+06	FALSE	176.1872341	7.038583554	188.338	7.524	96.15851977	3.841480226	0.821199	3655.091487	13.27675
OPT_apo_sym_6_mc_3_sym_3_on_2_1B_4F	apo	methane	methanol	0.997189	0.00281124	298	6.00E+06	TRUE	151.5733336	71.64069413	162.0266	76.5814	67.90493194	32.09506806	0.821199	3655.091487	13.27675
OPT_apo_sym_6_mc_3_sym_3_on_2_1B_4F	apo	methane	methanol	0.99789	0.00210991	298	8.00E+06	FALSE	204.8338201	0.585051855	218.9602	0.6254	99.7151908	0.284809204	0.821199	3655.091487	13.27675
OPT_apo_sym_6_mc_3_sym_3_on_2_1B_4F	apo	methane	methanol	0.99789	0.00210991	298	8.00E+06	TRUE	189.4385557	31.60327758	202.5032	33.7828	85.70258077	14.29741923	0.821199	3655.091487	13.27675
OPT_apo_sym_6_mc_3_sym_3_on_2_1B_4F	apo	methane	methanol	0.998311	0.00168864	298	1.00E+07	FALSE	222.5728468	0.715645457	237.9226	0.765	99.67949738	0.320502615	0.821199	3655.091487	13.27675
OPT_apo_sym_6_mc_3_sym_3_on_2_1B_4F	apo	methane	methanol	0.998311	0.00168864	298	1.00E+07	TRUE	213.1542042	21.09722807	227.8544	22.5522	90.99376774	9.006232264	0.821199	3655.091487	13.27675
OPT_apo_sym_6_mc_3_sym_3_on_2_1B_4H	apo	methane	22-dimethylbutane	0.989153	0.0108468	298	4.00E+06	FALSE	48.84030536	110.3074458	26.3738	59.5661	30.68865568	69.31134432	0.857486	4919.146201	14.73512
OPT_apo_sym_6_mc_3_sym_3_on_2_1B_4H	apo	methane	22-dimethylbutane	0.992743	0.00725744	298	6.00E+06	FALSE	91.91395174	87.2974764	49.6336	47.1407	51.28799692	48.71200308	0.857486	4919.146201	14.73512
OPT_apo_sym_6_mc_3_sym_3_on_2_1B_4H	apo	methane	22-dimethylbutane	0.994547	0.00545297	298	8.00E+06	FALSE	150.7038735	53.37122526	81.3802	28.8205	73.84726231	26.15273769	0.857486	4919.146201	14.73512
OPT_apo_sym_6_mc_3_sym_3_on_2_1B_4H	apo	methane	22-dimethylbutane	0.995633	0.00436714	298	1.00E+07	FALSE	195.9341837	27.25922298	105.8046	14.72	87.7867257	12.2132743	0.857486	4919.146201	14.73512
OPT_apo_sym_6_mc_3_sym_3_on_2_1B_4H	apo	methane	methanol	0.995789	0.00421093	298	4.00E+06	FALSE	128.9579765	14.4384993	69.6374	7.7968	89.93106405	10.06893595	0.857486	4919.146201	14.73512
OPT_apo_sym_6_mc_3_sym_3_on_2_1B_4H	apo	methane	methanol	0.995789	0.00421093	298	4.00E+06	TRUE	128.7374212	25.61218813	69.5183	13.8306	83.40637969	16.59362031	0.857486	4919.146201	14.73512
OPT_apo_sym_6_mc_3_sym_3_on_2_1B_4H	apo	methane	methanol	0.997189	0.00281124	298	6.00E+06	FALSE	171.3282905	5.175919037	92.5174	2.795	97.06753791	2.932462093	0.857486	4919.146201	14.73512
OPT_apo_sym_6_mc_3_sym_3_on_2_1B_4H	apo	methane	methanol	0.997189	0.00281124	298	6.00E+06	TRUE	171.324772	7.796841474	92.5155	4.2103	95.64717997	4.352820034	0.857486	4919.146201	14.73512
OPT_apo_sym_6_mc_3_sym_3_on_2_1B_4H	apo	methane	methanol	0.99789	0.00210991	298	8.00E+06	FALSE	202.8499152	1.107961488	109.5391	0.5983	99.45676945	0.543230547	0.857486	4919.146201	14.73512
OPT_apo_sym_6_mc_3_sym_3_on_2_1B_4H	apo	methane	methanol	0.99789	0.00210991	298	8.00E+06	TRUE	201.4056579	2.329626529	108.7592	1.258	98.85654243	1.143457568	0.857486	4919.146201	14.73512
OPT_apo_sym_6_mc_3_sym_3_on_2_1B_4H	apo	methane	methanol	0.998311	0.00168864	298	1.00E+07	FALSE	224.0552573	0.355555082	120.99	0.192	99.84156063	0.158439372	0.857486	4919.146201	14.73512
OPT_apo_sym_6_mc_3_sym_3_on_2_1B_4H	apo	methane	methanol	0.998311	0.00168864	298	1.00E+07	TRUE	223.0093328	1.196294704	120.4252	0.646	99.46642967	0.533570329	0.857486	4919.146201	14.73512
OPT_apo_sym_6_mc_3_sym_3_on_2_2B_2Br	apo	methane	22-dimethylbutane	0.989153	0.0108468	298	4.00E+06	FALSE	89.46218836	52.02955975	129.555	75.3468	63.22784866	36.77215134	0.889169	3499.653016	18.75794
OPT_apo_sym_6_mc_3_sym_3_on_2_2B_2Br	apo	methane	22-dimethylbutane	0.992743	0.00725744	298	6.00E+06	FALSE	129.4311499	21.40325283	187.4362	30.9952	85.81009873	14.18990127	0.889169	3499.653016	18.75794
OPT_apo_sym_6_mc_3_sym_3_on_2_2B_2Br	apo	methane	22-dimethylbutane	0.994547	0.00545297	298	8.00E+06	FALSE	159.3641603	13.23547346	230.7838	19.167	92.33169088	7.668309123	0.889169	3499.653016	18.75794
OPT_apo_sym_6_mc_3_sym_3_on_2_2B_2Br	apo	methane	22-dimethylbutane	0.995633	0.00436714	298	1.00E+07	FALSE	185.0967878	8.532243444	268.0486	12.356	95.59351023	4.406489765	0.889169	3499.653016	18.75794
OPT_apo_sym_6_mc_3_sym_3_on_2_2B_2Br	apo	methane	methanol	0.995789	0.00421093	298	4.00E+06	FALSE	98.58470064	1.40565189	142.7658	2.0356	98.59421249	1.405787513	0.889169	3499.653016	18.75794
OPT_apo_sym_6_mc_3_sym_3_on_2_2B_2Br	apo	methane	methanol	0.995789	0.00421093	298	4.00E+06	TRUE	92.83710634	24.96378647	134.4424	36.1514	78.80849128	21.19150872	0.889169	3499.653016	18.75794
OPT_apo_sym_6_mc_3_sym_3_on_2_2B_2Br	apo	methane	methanol	0.997189	0.00281124	298	6.00E+06	FALSE	136.8334028	0.660979559	198.1558	0.9572	99.51926795	0.480732047	0.889169	3499.653016	18.75794
OPT_apo_sym_6_mc_3_sym_3_on_2_2B_2Br	apo	methane	methanol	0.997189	0.00281124	298	6.00E+06	TRUE	131.9691402	9.533794584	191.1116	13.8064	93.26247572	6.737524278	0.889169	3499.653016	18.75794
OPT_apo_sym_6_mc_3_sym_3_on_2_2B_2Br	apo	methane	methanol	0.99789	0.00210991	298	8.00E+06	FALSE	164.3800643	0.344576682	238.0476	0.499	99.79081655	0.209183447	0.889169	3499.653016	18.75794
OPT_apo_sym_6_mc_3_sym_3_on_2_2B_2Br	apo	methane	methanol	0.99789	0.00210991	298	8.00E+06	TRUE	162.6794161	5.445692639	235.5848	7.8862	96.76092841	3.239071594	0.889169	3499.653016	18.75794
OPT_apo_sym_6_mc_3_sym_3_on_2_2B_2Br	apo	methane	methanol	0.998311	0.00168864	298	1.00E+07	FALSE	188.7274797	0.429236203	273.3064	0.6216	99.77307906	0.226920943	0.889169	3499.653016	18.75794
OPT_apo_sym_6_mc_3_sym_3_on_2_2B_2Br	apo	methane	methanol	0.998311	0.00168864	298	1.00E+07	TRUE	188.6341195	1.806576181	273.1712	2.6162	99.05137073	0.94862927	0.889169	3499.653016	18.75794
OPT_apo_sym_6_mc_3_sym_3_on_2_2B_2CF3	apo	methane	22-dimethylbutane	0.989153	0.0108468	298	4.00E+06	FALSE	88.72313923	27.24762019	128.3104	39.4052	76.50474971	23.49525029	0.829046	3930.598028	18.04951
OPT_apo_sym_6_mc_3_sym_3_on_2_2B_2CF3	apo	methane	22-dimethylbutane	0.992743	0.00725744	298	6.00E+06	FALSE	123.1908408	15.32331171	178.1572	22.1604	88.93736746	11.06263254	0.829046	3930.598028	18.04951
OPT_apo_sym_6_mc_3_sym_3_on_2_2B_2CF3	apo	methane	22-dimethylbutane	0.994547	0.00545297	298	8.00E+06	FALSE	150.2882731	9.543291376	217.3452	13.8014	94.02915725	5.970842747	0.829046	3930.598028	18.04951
OPT_apo_sym_6_mc_3_sym_3_on_2_2B_2CF3	apo	methane	22-dimethylbutane	0.995633	0.00436714	298	1.00E+07	FALSE	173.5879991	6.389899257	251.041	9.241	96.44962003	3.550379972	0.829046	3930.598028	18.04951
OPT_apo_sym_6_mc_3_sym_3_on_2_2B_2CF3	apo	methane	methanol	0.995789	0.00421093	298	4.00E+06	FALSE	92.39333805	0.745407575	133.6182	1.078	99.19968047	0.800319534	0.829046	3930.598028	18.04951
OPT_apo_sym_6_mc_3_sym_3_on_2_2B_2CF3	apo	methane	methanol	0.995789	0.00421093	298	4.00E+06	TRUE	82.79459056	32.80650756	119.7366	47.4444	71.62093779	28.37906221	0.829046	3930.598028	18.04951
OPT_apo_sym_6_mc_3_sym_3_on_2_2B_2CF3	apo	methane	methanol	0.997189	0.00281124	298	6.00E+06	FALSE	126.0654311	0.608634274	182.3144	0.8802	99.51952732	0.480472678	0.829046	3930.598028	18.04951
OPT_apo_sym_6_mc_3_sym_3_on_2_2B_2CF3	apo	methane	methanol	0.997189	0.00281124	298	6.00E+06	TRUE	116.7508789	26.08152063	168.8438	37.7188	81.73977283	18.26022717	0.829046	3930.598028	18.04951
OPT_apo_sym_6_mc_3_sym_3_on_2_2B_2CF3	apo	methane	methanol	0.99789	0.00210991	298	8.00E+06	FALSE	154.6301685	0.309918066	223.6244	0.4482	99.79997554	0.200024456	0.829046	3930.598028	18.04951
OPT_apo_sym_6_mc_3_sym_3_on_2_2B_2CF3	apo	methane	methanol	0.99789	0.00210991	298	8.00E+06	TRUE	147.4665113	16.45110369	213.2644	23.7914	89.96379755	10.03620245	0.829046	3930.598028	18.04951
OPT_apo_sym_6_mc_3_sym_3_on_2_2B_2CF3	apo	methane	methanol	0.998311	0.00168864	298	1.00E+07	FALSE	176.0619501	0.206058866	254.6188	0.298	99.88309911	0.116900887	0.829046	3930.598028	18.04951
OPT_apo_sym_6_mc_3_sym_3_on_2_2B_2CF3	apo	methane	methanol	0.998311	0.00168864	298	1.00E+07	TRUE	172.3508161	9.632491355	249.2518	13.9304	94.70693687	5.293063133	0.829046	3930.598028	18.04951
OPT_apo_sym_6_mc_3_sym_3_on_2_2B_2CH3	apo	methane	22-dimethylbutane	0.989153	0.0108468	298	4.00E+06	FALSE	84.39487553	23.19177075	123.2304	33.8638	78.44363446	21.55636554	0.862015	6448.824596	19.90079
OPT_apo_sym_6_mc_3_sym_3_on_2_2B_2CH3	apo	methane	22-dimethylbutane	0.992743	0.00725744	298	6.00E+06	FALSE	116.7549284	13.77817376	170.4814	20.1184	89.44468987	10.55531013	0.862015	6448.824596	19.90079
OPT_apo_sym_6_mc_3_sym_3_on_2_2B_2CH3	apo	methane	22-dimethylbutane	0.994547	0.00545297	298	8.00E+06	FALSE	145.3304762	8.732851763	212.2064	12.7514	94.33164798	5.66835202	0.862015	6448.824596	19.90079
OPT_apo_sym_6_mc_3_sym_3_on_2_2B_2CH3	apo	methane	22-dimethylbutane	0.995633	0.00436714	298	1.00E+07	FALSE	169.5907567	5.97425844	247.6304	8.7234	96.59712475	3.402875245	0.862015	6448.824596	19.90079
OPT_apo_sym_6_mc_3_sym_3_on_2_2B_2CH3	apo	methane	methanol	0.995789	0.00421093	298	4.00E+06	FALSE	87.453709	3.746153296	127.6968	5.47	95.89236957	4.10763043	0.862015	6448.824596	19.90079
OPT_apo_sym_6_mc_3_sym_3_on_2_2B_2CH3	apo	methane	methanol	0.995789	0.00421093	298	4.00E+06	TRUE	82.66685104	18.22630277	120.7072	26.6134	81.93504506	18.06495494	0.862015	6448.824596	19.90079
OPT_apo_sym_6_mc_3_sym_3_on_2_2B_2CH3	apo	methane	methanol	0.997189	0.00281124	298	6.00E+06	FALSE	119.9515546	0.388723329	175.149	0.5676	99.67697986	0.323020136	0.862015	6448.824596	19.90079
OPT_apo_sym_6_mc_3_sym_3_on_2_2B_2CH3	apo	methane	methanol	0.997189	0.00281124	298	6.00E+06	TRUE	116.7206857	7.781315128	170.4314	11.362	93.75004813	6.249951868	0.862015	6448.824596	19.90079
OPT_apo_sym_6_mc_3_sym_3_on_2_2B_2CH3	apo	methane	methanol	0.99789	0.00210991	298	8.00E+06	FALSE	147.5958374	0.260929508	215.5142	0.381	99.82352549	0.176474512	0.862015	6448.824596	19.90079
OPT_apo_sym_6_mc_3_sym_3_on_2_2B_2CH3	apo	methane	methanol	0.99789	0.00210991	298	8.00E+06	TRUE	146.953444	7.970334929	214.5762	11.638	94.85531854	5.144681457	0.862015	6448.824596	19.90079
OPT_apo_sym_6_mc_3_sym_3_on_2_2B_2CH3	apo	methane	methanol	0.998311	0.00168864	298	1.00E+07	FALSE	172.5591894	0.197238053	251.9648	0.288	99.88582882	0.114171181	0.862015	6448.824596	19.90079
OPT_apo_sym_6_mc_3_sym_3_on_2_2B_2CH3	apo	methane	methanol	0.998311	0.00168864	298	1.00E+07	TRUE	169.8922296	3.368661578	248.0706	4.9188	98.05572882	1.944271183	0.862015	6448.824596	19.90079
OPT_apo_sym_6_mc_3_sym_3_on_2_2B_2CN	apo	methane	22-dimethylbutane	0.989153	0.0108468	298	4.00E+06	FALSE	86.72998451	25.60933952	128.2438	37.8674	77.20358411	22.79641589	0.877077	5892.776594	19.86461
OPT_apo_sym_6_mc_3_sym_3_on_2_2B_2CN	apo	methane	22-dimethylbutane	0.992743	0.00725744	298	6.00E+06	FALSE	121.3964687	15.24289767	179.5036	22.539	88.84443182	11.15556818	0.877077	5892.776594	19.86461
OPT_apo_sym_6_mc_3_sym_3_on_2_2B_2CN	apo	methane	22-dimethylbutane	0.994547	0.00545297	298	8.00E+06	FALSE	150.3461392	9.34997815	222.3102	13.8254	94.14514372	5.854856277	0.877077	5892.776594	19.86461
OPT_apo_sym_6_mc_3_sym_3_on_2_2B_2CN	apo	methane	22-dimethylbutane	0.995633	0.00436714	298	1.00E+07	FALSE	173.3025287	6.339947138	256.2548	9.3746	96.47079728	3.529202716	0.877077	5892.776594	19.86461
OPT_apo_sym_6_mc_3_sym_3_on_2_2B_2CN	apo	methane	methanol	0.995789	0.00421093	298	4.00E+06	FALSE	91.02983558	0.67047379	134.6018	0.9914	99.26884239	0.73115761	0.877077	5892.776594	19.86461
OPT_apo_sym_6_mc_3_sym_3_on_2_2B_2CN	apo	methane	methanol	0.995789	0.00421093	298	4.00E+06	TRUE	76.73523158	89.2936642	113.465	132.0346	46.21799791	53.78200209	0.877077	5892.776594	19.86461
OPT_apo_sym_6_mc_3_sym_3_on_2_2B_2CN	apo	methane	methanol	0.997189	0.00281124	298	6.00E+06	FALSE	125.1212028	0.413483635	185.0112	0.6114	99.670622	0.329377996	0.877077	5892.776594	19.86461
OPT_apo_sym_6_mc_3_sym_3_on_2_2B_2CN	apo	methane	methanol	0.997189	0.00281124	298	6.00E+06	TRUE	110.1930505	75.83617181	162.9376	112.1356	59.23426928	40.76573072	0.877077	5892.776594	19.86461
OPT_apo_sym_6_mc_3_sym_3_on_2_2B_2CN	apo	methane	methanol	0.99789	0.00210991	298	8.00E+06	FALSE	153.2551325	0.299596418	226.6116	0.443	99.80489274	0.195107256	0.877077	5892.776594	19.86461
OPT_apo_sym_6_mc_3_sym_3_on_2_2B_2CN	apo	methane	methanol	0.99789	0.00210991	298	8.00E+06	TRUE	139.4654465	52.05579065	206.2214	76.9726	72.81983375	27.18016625	0.877077	5892.776594	19.86461
OPT_apo_sym_6_mc_3_sym_3_on_2_2B_2CN	apo	methane	methanol	0.998311	0.00168864	298	1.00E+07	FALSE	177.2110785	0.222769888	262.0342	0.3294	99.87444905	0.125550953	0.877077	5892.776594	19.86461
OPT_apo_sym_6_mc_3_sym_3_on_2_2B_2CN	apo	methane	methanol	0.998311	0.00168864	298	1.00E+07	TRUE	166.8453129	36.58498329	246.7068	54.0966	82.01596126	17.98403874	0.877077	5892.776594	19.86461
OPT_apo_sym_6_mc_3_sym_3_on_2_2B_2F	apo	methane	22-dimethylbutane	0.989153	0.0108468	298	4.00E+06	FALSE	85.69630028	16.79386745	126.339	24.7586	83.61416727	16.38583273	0.90749	5531.687552	20.72496
OPT_apo_sym_6_mc_3_sym_3_on_2_2B_2F	apo	methane	22-dimethylbutane	0.992743	0.00725744	298	6.00E+06	FALSE	119.8371246	10.35960752	176.6716	15.2728	92.04311248	7.956887515	0.90749	5531.687552	20.72496
OPT_apo_sym_6_mc_3_sym_3_on_2_2B_2F	apo	methane	22-dimethylbutane	0.994547	0.00545297	298	8.00E+06	FALSE	149.8341873	6.919111918	220.8952	10.2006	95.58598642	4.414013582	0.90749	5531.687552	20.72496
OPT_apo_sym_6_mc_3_sym_3_on_2_2B_2F	apo	methane	22-dimethylbutane	0.995633	0.00436714	298	1.00E+07	FALSE	174.804743	4.800902921	257.7084	7.0778	97.3269755	2.673024501	0.90749	5531.687552	20.72496
OPT_apo_sym_6_mc_3_sym_3_on_2_2B_2F	apo	methane	methanol	0.995789	0.00421093	298	4.00E+06	FALSE	85.86913224	0.568826074	126.5938	0.8386	99.3419256	0.658074399	0.90749	5531.687552	20.72496
OPT_apo_sym_6_mc_3_sym_3_on_2_2B_2F	apo	methane	methanol	0.995789	0.00421093	298	4.00E+06	TRUE	84.09414527	18.94273581	123.977	27.9266	81.61557725	18.38442275	0.90749	5531.687552	20.72496
OPT_apo_sym_6_mc_3_sym_3_on_2_2B_2F	apo	methane	methanol	0.997189	0.00281124	298	6.00E+06	FALSE	121.3080955	0.364249466	178.8402	0.537	99.70063085	0.299369151	0.90749	5531.687552	20.72496
OPT_apo_sym_6_mc_3_sym_3_on_2_2B_2F	apo	methane	methanol	0.997189	0.00281124	298	6.00E+06	TRUE	120.1175356	10.0569481	177.085	14.8266	92.27425544	7.725744562	0.90749	5531.687552	20.72496
OPT_apo_sym_6_mc_3_sym_3_on_2_2B_2F	apo	methane	methanol	0.99789	0.00210991	298	8.00E+06	FALSE	152.3095914	0.278511789	224.5446	0.4106	99.81747477	0.182525232	0.90749	5531.687552	20.72496
OPT_apo_sym_6_mc_3_sym_3_on_2_2B_2F	apo	methane	methanol	0.99789	0.00210991	298	8.00E+06	TRUE	149.8941494	4.18174666	220.9836	6.165	97.28591768	2.714082323	0.90749	5531.687552	20.72496
OPT_apo_sym_6_mc_3_sym_3_on_2_2B_2F	apo	methane	methanol	0.998311	0.00168864	298	1.00E+07	FALSE	175.932085	0.212037957	259.3704	0.3126	99.87962246	0.120377537	0.90749	5531.687552	20.72496
OPT_apo_sym_6_mc_3_sym_3_on_2_2B_2F	apo	methane	methanol	0.998311	0.00168864	298	1.00E+07	TRUE	175.3087232	3.222217248	258.4514	4.7504	98.19514912	1.804850879	0.90749	5531.687552	20.72496
OPT_apo_sym_6_mc_3_sym_3_on_2_2B_2NH2	apo	methane	22-dimethylbutane	0.989153	0.0108468	298	4.00E+06	FALSE	87.63736611	21.8733604	127.3844	31.7938	80.02628501	19.97371499	0.880884	6159.262284	20.16176
OPT_apo_sym_6_mc_3_sym_3_on_2_2B_2NH2	apo	methane	22-dimethylbutane	0.992743	0.00725744	298	6.00E+06	FALSE	120.8786987	12.60357642	175.702	18.3198	90.55786515	9.442134853	0.880884	6159.262284	20.16176
OPT_apo_sym_6_mc_3_sym_3_on_2_2B_2NH2	apo	methane	22-dimethylbutane	0.994547	0.00545297	298	8.00E+06	FALSE	149.0473115	8.005147134	216.6462	11.6358	94.90288328	5.097116724	0.880884	6159.262284	20.16176
OPT_apo_sym_6_mc_3_sym_3_on_2_2B_2NH2	apo	methane	22-dimethylbutane	0.995633	0.00436714	298	1.00E+07	FALSE	175.6943974	5.302503569	255.3788	7.7074	97.07038986	2.929610143	0.880884	6159.262284	20.16176
OPT_apo_sym_6_mc_3_sym_3_on_2_2B_2NH2	apo	methane	methanol	0.995789	0.00421093	298	4.00E+06	FALSE	88.26108484	0.785530604	128.291	1.1418	99.11784339	0.882156609	0.880884	6159.262284	20.16176
OPT_apo_sym_6_mc_3_sym_3_on_2_2B_2NH2	apo	methane	methanol	0.995789	0.00421093	298	4.00E+06	TRUE	83.27202298	29.7465538	121.0392	43.2378	73.67994302	26.32005698	0.880884	6159.262284	20.16176
OPT_apo_sym_6_mc_3_sym_3_on_2_2B_2NH2	apo	methane	methanol	0.997189	0.00281124	298	6.00E+06	FALSE	122.5638262	0.410996657	178.1514	0.5974	99.66578797	0.334212034	0.880884	6159.262284	20.16176
OPT_apo_sym_6_mc_3_sym_3_on_2_2B_2NH2	apo	methane	methanol	0.997189	0.00281124	298	6.00E+06	TRUE	118.1239065	20.49864745	171.6978	29.7956	85.21261739	14.78738261	0.880884	6159.262284	20.16176
OPT_apo_sym_6_mc_3_sym_3_on_2_2B_2NH2	apo	methane	methanol	0.99789	0.00210991	298	8.00E+06	FALSE	152.6491392	0.284409136	221.8816	0.4134	99.8140309	0.185969095	0.880884	6159.262284	20.16176
OPT_apo_sym_6_mc_3_sym_3_on_2_2B_2NH2	apo	methane	methanol	0.99789	0.00210991	298	8.00E+06	TRUE	146.0054959	19.77297072	212.2248	28.7408	88.07265435	11.92734565	0.880884	6159.262284	20.16176
OPT_apo_sym_6_mc_3_sym_3_on_2_2B_2NH2	apo	methane	methanol	0.998311	0.00168864	298	1.00E+07	FALSE	176.4199365	0.1893309	256.4334	0.2752	99.89279674	0.107203265	0.880884	6159.262284	20.16176
OPT_apo_sym_6_mc_3_sym_3_on_2_2B_2NH2	apo	methane	methanol	0.998311	0.00168864	298	1.00E+07	TRUE	172.0738567	10.25964336	250.1162	14.9128	94.37314407	5.626855929	0.880884	6159.262284	20.16176
OPT_apo_sym_6_mc_3_sym_3_on_2_2B_2NO2	apo	methane	22-dimethylbutane	0.989153	0.0108468	298	4.00E+06	FALSE	88.75478371	29.55111378	128.9644	42.939	75.02143646	24.97856354	0.855107	4732.821416	18.25028
OPT_apo_sym_6_mc_3_sym_3_on_2_2B_2NO2	apo	methane	22-dimethylbutane	0.992743	0.00725744	298	6.00E+06	FALSE	123.6173762	16.26532833	179.6212	23.6342	88.37216625	11.62783375	0.855107	4732.821416	18.25028
OPT_apo_sym_6_mc_3_sym_3_on_2_2B_2NO2	apo	methane	22-dimethylbutane	0.994547	0.00545297	298	8.00E+06	FALSE	152.1731985	10.22420775	221.114	14.8562	93.70420502	6.295794978	0.855107	4732.821416	18.25028
OPT_apo_sym_6_mc_3_sym_3_on_2_2B_2NO2	apo	methane	22-dimethylbutane	0.995633	0.00436714	298	1.00E+07	FALSE	175.6402473	6.260935338	255.2126	9.0974	96.55805683	3.441943173	0.855107	4732.821416	18.25028
OPT_apo_sym_6_mc_3_sym_3_on_2_2B_2NO2	apo	methane	methanol	0.995789	0.00421093	298	4.00E+06	FALSE	93.69394003	0.665638167	136.1412	0.9672	99.29457276	0.705427239	0.855107	4732.821416	18.25028
OPT_apo_sym_6_mc_3_sym_3_on_2_2B_2NO2	apo	methane	methanol	0.995789	0.00421093	298	4.00E+06	TRUE	73.30003088	121.8336697	106.508	177.0294	37.5640039	62.4359961	0.855107	4732.821416	18.25028
OPT_apo_sym_6_mc_3_sym_3_on_2_2B_2NO2	apo	methane	methanol	0.997189	0.00281124	298	6.00E+06	FALSE	127.3240834	0.423250075	185.0072	0.615	99.66868187	0.331318129	0.855107	4732.821416	18.25028
OPT_apo_sym_6_mc_3_sym_3_on_2_2B_2NO2	apo	methane	methanol	0.997189	0.00281124	298	6.00E+06	TRUE	107.5143282	101.2628902	156.2228	147.1392	51.49715521	48.50284479	0.855107	4732.821416	18.25028
OPT_apo_sym_6_mc_3_sym_3_on_2_2B_2NO2	apo	methane	methanol	0.99789	0.00210991	298	8.00E+06	FALSE	156.5276504	0.376451693	227.4412	0.547	99.7600753	0.239924698	0.855107	4732.821416	18.25028
OPT_apo_sym_6_mc_3_sym_3_on_2_2B_2NO2	apo	methane	methanol	0.99789	0.00210991	298	8.00E+06	TRUE	136.473993	73.03410596	198.3024	106.1216	65.1401992	34.8598008	0.855107	4732.821416	18.25028
OPT_apo_sym_6_mc_3_sym_3_on_2_2B_2NO2	apo	methane	methanol	0.998311	0.00168864	298	1.00E+07	FALSE	179.3670503	0.22311817	260.6278	0.3242	99.87576259	0.124237408	0.855107	4732.821416	18.25028
OPT_apo_sym_6_mc_3_sym_3_on_2_2B_2NO2	apo	methane	methanol	0.998311	0.00168864	298	1.00E+07	TRUE	157.5183996	60.7283337	228.8808	88.2408	72.17445926	27.82554074	0.855107	4732.821416	18.25028
OPT_apo_sym_6_mc_3_sym_3_on_2_2B_2OH	apo	methane	22-dimethylbutane	0.989153	0.0108468	298	4.00E+06	FALSE	87.02891763	19.13760224	127.9258	28.1308	81.97397611	18.02602389	0.894912	5918.323402	20.26496
OPT_apo_sym_6_mc_3_sym_3_on_2_2B_2OH	apo	methane	22-dimethylbutane	0.992743	0.00725744	298	6.00E+06	FALSE	120.75953	11.95409627	177.5072	17.5716	90.99256301	9.007436995	0.894912	5918.323402	20.26496
OPT_apo_sym_6_mc_3_sym_3_on_2_2B_2OH	apo	methane	22-dimethylbutane	0.994547	0.00545297	298	8.00E+06	FALSE	151.4991012	7.902455229	222.692	11.616	95.04242279	4.957577206	0.894912	5918.323402	20.26496
OPT_apo_sym_6_mc_3_sym_3_on_2_2B_2OH	apo	methane	22-dimethylbutane	0.995633	0.00436714	298	1.00E+07	FALSE	175.3642983	5.207620032	257.772	7.6548	97.11604103	2.883958967	0.894912	5918.323402	20.26496
OPT_apo_sym_6_mc_3_sym_3_on_2_2B_2OH	apo	methane	methanol	0.995789	0.00421093	298	4.00E+06	FALSE	87.35873084	0.682212647	128.4106	1.0028	99.22511888	0.774881117	0.894912	5918.323402	20.26496
OPT_apo_sym_6_mc_3_sym_3_on_2_2B_2OH	apo	methane	methanol	0.995789	0.00421093	298	4.00E+06	TRUE	79.14442252	105.1052397	116.3362	154.4966	42.9549892	57.0450108	0.894912	5918.323402	20.26496
OPT_apo_sym_6_mc_3_sym_3_on_2_2B_2OH	apo	methane	methanol	0.997189	0.00281124	298	6.00E+06	FALSE	122.1272208	0.552818106	179.5176	0.8126	99.54938219	0.450617811	0.894912	5918.323402	20.26496
OPT_apo_sym_6_mc_3_sym_3_on_2_2B_2OH	apo	methane	methanol	0.997189	0.00281124	298	6.00E+06	TRUE	107.6497269	89.40904244	158.2368	131.4244	54.62823464	45.37176536	0.894912	5918.323402	20.26496
OPT_apo_sym_6_mc_3_sym_3_on_2_2B_2OH	apo	methane	methanol	0.99789	0.00210991	298	8.00E+06	FALSE	150.8257326	0.26736096	221.7022	0.393	99.82304885	0.176951145	0.894912	5918.323402	20.26496
OPT_apo_sym_6_mc_3_sym_3_on_2_2B_2OH	apo	methane	methanol	0.99789	0.00210991	298	8.00E+06	TRUE	139.5511277	56.00579414	205.1294	82.3242	71.36087355	28.63912645	0.894912	5918.323402	20.26496
OPT_apo_sym_6_mc_3_sym_3_on_2_2B_2OH	apo	methane	methanol	0.998311	0.00168864	298	1.00E+07	FALSE	177.5731216	0.213888768	261.0188	0.3144	99.87969382	0.120306184	0.894912	5918.323402	20.26496
OPT_apo_sym_6_mc_3_sym_3_on_2_2B_2OH	apo	methane	methanol	0.998311	0.00168864	298	1.00E+07	TRUE	166.0512929	45.04589967	244.0826	66.214	78.66106171	21.33893829	0.894912	5918.323402	20.26496
OPT_apo_sym_6_mc_3_sym_3_on_2_2B_2SH	apo	methane	22-dimethylbutane	0.989153	0.0108468	298	4.00E+06	FALSE	89.85730243	46.50333514	130.596	67.5866	65.89680426	34.10319574	0.876321	5143.238872	18.79697
OPT_apo_sym_6_mc_3_sym_3_on_2_2B_2SH	apo	methane	22-dimethylbutane	0.992743	0.00725744	298	6.00E+06	FALSE	126.0815005	20.90464129	183.2432	30.3822	85.77781481	14.22218519	0.876321	5143.238872	18.79697
OPT_apo_sym_6_mc_3_sym_3_on_2_2B_2SH	apo	methane	22-dimethylbutane	0.994547	0.00545297	298	8.00E+06	FALSE	155.6019734	13.39740481	226.1474	19.4714	92.07251236	7.927487635	0.876321	5143.238872	18.79697
OPT_apo_sym_6_mc_3_sym_3_on_2_2B_2SH	apo	methane	22-dimethylbutane	0.995633	0.00436714	298	1.00E+07	FALSE	180.9798014	8.236300139	263.0308	11.9704	95.64714627	4.352853733	0.876321	5143.238872	18.79697
OPT_apo_sym_6_mc_3_sym_3_on_2_2B_2SH	apo	methane	methanol	0.995789	0.00421093	298	4.00E+06	FALSE	96.55070681	1.389734597	140.324	2.0198	98.58104111	1.418958887	0.876321	5143.238872	18.79697
OPT_apo_sym_6_mc_3_sym_3_on_2_2B_2SH	apo	methane	methanol	0.995789	0.00421093	298	4.00E+06	TRUE	87.20071996	41.25099431	126.735	59.953	67.8859916	32.1140084	0.876321	5143.238872	18.79697
OPT_apo_sym_6_mc_3_sym_3_on_2_2B_2SH	apo	methane	methanol	0.997189	0.00281124	298	6.00E+06	FALSE	131.8213975	0.474483106	191.5854	0.6896	99.64134703	0.358652971	0.876321	5143.238872	18.79697
OPT_apo_sym_6_mc_3_sym_3_on_2_2B_2SH	apo	methane	methanol	0.997189	0.00281124	298	6.00E+06	TRUE	123.2998295	23.28132277	179.2004	33.8364	84.11711028	15.88288972	0.876321	5143.238872	18.79697
OPT_apo_sym_6_mc_3_sym_3_on_2_2B_2SH	apo	methane	methanol	0.99789	0.00210991	298	8.00E+06	FALSE	161.126509	0.512463773	234.1766	0.7448	99.68295779	0.317042211	0.876321	5143.238872	18.79697
OPT_apo_sym_6_mc_3_sym_3_on_2_2B_2SH	apo	methane	methanol	0.99789	0.00210991	298	8.00E+06	TRUE	152.3195356	21.41462806	221.3768	31.1234	87.67391075	12.32608925	0.876321	5143.238872	18.79697
OPT_apo_sym_6_mc_3_sym_3_on_2_2B_2SH	apo	methane	methanol	0.998311	0.00168864	298	1.00E+07	FALSE	184.2673308	0.244672553	267.8088	0.3556	99.86739478	0.132605223	0.876321	5143.238872	18.79697
OPT_apo_sym_6_mc_3_sym_3_on_2_2B_2SH	apo	methane	methanol	0.998311	0.00168864	298	1.00E+07	TRUE	179.3634213	10.81059117	260.6816	15.7118	94.31542142	5.684578575	0.876321	5143.238872	18.79697
OPT_apo_sym_6_mc_3_sym_3_on_2_2B_4Br	apo	methane	22-dimethylbutane	0.989153	0.0108468	298	4.00E+06	FALSE	69.63301101	88.12589405	101.747	128.7686	44.13887824	55.86112176	0.855989	2280.081994	18.48168
OPT_apo_sym_6_mc_3_sym_3_on_2_2B_4Br	apo	methane	22-dimethylbutane	0.992743	0.00725744	298	6.00E+06	FALSE	125.2646862	33.26947786	183.0354	48.613	79.01431652	20.98568348	0.855989	2280.081994	18.48168
OPT_apo_sym_6_mc_3_sym_3_on_2_2B_4Br	apo	methane	22-dimethylbutane	0.994547	0.00545297	298	8.00E+06	FALSE	157.4980217	18.30454329	230.1344	26.7464	89.58801125	10.41198875	0.855989	2280.081994	18.48168
OPT_apo_sym_6_mc_3_sym_3_on_2_2B_4Br	apo	methane	22-dimethylbutane	0.995633	0.00436714	298	1.00E+07	FALSE	184.6899838	11.15913024	269.867	16.3056	94.30217987	5.697820127	0.855989	2280.081994	18.48168
OPT_apo_sym_6_mc_3_sym_3_on_2_2B_4Br	apo	methane	methanol	0.995789	0.00421093	298	4.00E+06	FALSE	104.4740855	1.064612342	152.6564	1.5556	98.99125879	1.008741213	0.855989	2280.081994	18.48168
OPT_apo_sym_6_mc_3_sym_3_on_2_2B_4Br	apo	methane	methanol	0.995789	0.00421093	298	4.00E+06	TRUE	101.1194206	7.968304459	147.7546	11.6432	92.69550772	7.304492283	0.855989	2280.081994	18.48168
OPT_apo_sym_6_mc_3_sym_3_on_2_2B_4Br	apo	methane	methanol	0.997189	0.00281124	298	6.00E+06	FALSE	140.7320882	0.755549001	205.6362	1.104	99.46599645	0.534003546	0.855989	2280.081994	18.48168
OPT_apo_sym_6_mc_3_sym_3_on_2_2B_4Br	apo	methane	methanol	0.997189	0.00281124	298	6.00E+06	TRUE	138.5627592	6.397118413	202.4664	9.3474	95.58697309	4.413026913	0.855989	2280.081994	18.48168
OPT_apo_sym_6_mc_3_sym_3_on_2_2B_4Br	apo	methane	methanol	0.99789	0.00210991	298	8.00E+06	FALSE	169.2554317	0.49931934	247.3142	0.7296	99.7058584	0.294141599	0.855989	2280.081994	18.48168
OPT_apo_sym_6_mc_3_sym_3_on_2_2B_4Br	apo	methane	methanol	0.99789	0.00210991	298	8.00E+06	TRUE	167.0208134	2.885184308	244.049	4.2158	98.30189378	1.698106216	0.855989	2280.081994	18.48168
OPT_apo_sym_6_mc_3_sym_3_on_2_2B_4Br	apo	methane	methanol	0.998311	0.00168864	298	1.00E+07	FALSE	192.4696748	0.297976481	281.2346	0.4354	99.84542195	0.154578052	0.855989	2280.081994	18.48168
OPT_apo_sym_6_mc_3_sym_3_on_2_2B_4Br	apo	methane	methanol	0.998311	0.00168864	298	1.00E+07	TRUE	188.973755	2.356163133	276.1264	3.4428	98.76853387	1.231466127	0.855989	2280.081994	18.48168
OPT_apo_sym_6_mc_3_sym_3_on_2_2B_4CN	apo	methane	22-dimethylbutane	0.989153	0.0108468	298	4.00E+06	FALSE	84.6796631	21.53751002	125.121	31.8234	79.72313762	20.27686238	0.82457	4617.203206	17.64078
OPT_apo_sym_6_mc_3_sym_3_on_2_2B_4CN	apo	methane	22-dimethylbutane	0.992743	0.00725744	298	6.00E+06	FALSE	116.9330714	12.84424292	172.778	18.9784	90.10285967	9.89714033	0.82457	4617.203206	17.64078
OPT_apo_sym_6_mc_3_sym_3_on_2_2B_4CN	apo	methane	22-dimethylbutane	0.994547	0.00545297	298	8.00E+06	FALSE	143.8244699	8.211533542	212.5122	12.1332	94.59895462	5.401045381	0.82457	4617.203206	17.64078
OPT_apo_sym_6_mc_3_sym_3_on_2_2B_4CN	apo	methane	22-dimethylbutane	0.995633	0.00436714	298	1.00E+07	FALSE	166.9133	5.400045011	246.6278	7.979	96.86614812	3.133851885	0.82457	4617.203206	17.64078
OPT_apo_sym_6_mc_3_sym_3_on_2_2B_4CN	apo	methane	methanol	0.995789	0.00421093	298	4.00E+06	FALSE	87.28405628	0.853828398	128.9692	1.2616	99.03125835	0.968741649	0.82457	4617.203206	17.64078
OPT_apo_sym_6_mc_3_sym_3_on_2_2B_4CN	apo	methane	methanol	0.995789	0.00421093	298	4.00E+06	TRUE	71.68111384	100.9097119	105.9146	149.1022	41.532401	58.467599	0.82457	4617.203206	17.64078
OPT_apo_sym_6_mc_3_sym_3_on_2_2B_4CN	apo	methane	methanol	0.997189	0.00281124	298	6.00E+06	FALSE	119.0486925	0.382923357	175.904	0.5658	99.67937857	0.320621432	0.82457	4617.203206	17.64078
OPT_apo_sym_6_mc_3_sym_3_on_2_2B_4CN	apo	methane	methanol	0.997189	0.00281124	298	6.00E+06	TRUE	101.0710568	87.09591084	149.3406	128.6912	53.71349608	46.28650392	0.82457	4617.203206	17.64078
OPT_apo_sym_6_mc_3_sym_3_on_2_2B_4CN	apo	methane	methanol	0.99789	0.00210991	298	8.00E+06	FALSE	146.2844378	0.304687337	216.147	0.4502	99.79214874	0.207851256	0.82457	4617.203206	17.64078
OPT_apo_sym_6_mc_3_sym_3_on_2_2B_4CN	apo	methane	methanol	0.99789	0.00210991	298	8.00E+06	TRUE	126.5930542	70.3458226	187.0514	103.9416	64.28037788	35.71962212	0.82457	4617.203206	17.64078
OPT_apo_sym_6_mc_3_sym_3_on_2_2B_4CN	apo	methane	methanol	0.998311	0.00168864	298	1.00E+07	FALSE	169.2907005	0.207095347	250.1406	0.306	99.87781827	0.122181735	0.82457	4617.203206	17.64078
OPT_apo_sym_6_mc_3_sym_3_on_2_2B_4CN	apo	methane	methanol	0.998311	0.00168864	298	1.00E+07	TRUE	150.3389045	55.67778707	222.1378	82.2684	72.97413785	27.02586215	0.82457	4617.203206	17.64078
OPT_apo_sym_6_mc_3_sym_3_on_2_2B_4F	apo	methane	22-dimethylbutane	0.989153	0.0108468	298	4.00E+06	FALSE	87.22462859	18.02554973	128.2146	26.4964	82.87361597	17.12638403	0.893338	4708.258864	20.31899
OPT_apo_sym_6_mc_3_sym_3_on_2_2B_4F	apo	methane	22-dimethylbutane	0.992743	0.00725744	298	6.00E+06	FALSE	121.7530765	10.82074504	178.9692	15.9058	91.8379474	8.162052598	0.893338	4708.258864	20.31899
OPT_apo_sym_6_mc_3_sym_3_on_2_2B_4F	apo	methane	22-dimethylbutane	0.994547	0.00545297	298	8.00E+06	FALSE	148.8324913	6.901798251	218.7742	10.1452	95.56822183	4.431778172	0.893338	4708.258864	20.31899
OPT_apo_sym_6_mc_3_sym_3_on_2_2B_4F	apo	methane	22-dimethylbutane	0.995633	0.00436714	298	1.00E+07	FALSE	176.3508369	4.84456548	259.2244	7.1212	97.3263309	2.673669098	0.893338	4708.258864	20.31899
OPT_apo_sym_6_mc_3_sym_3_on_2_2B_4F	apo	methane	methanol	0.995789	0.00421093	298	4.00E+06	FALSE	87.06067585	0.556214786	127.9736	0.8176	99.36517402	0.634825982	0.893338	4708.258864	20.31899
OPT_apo_sym_6_mc_3_sym_3_on_2_2B_4F	apo	methane	methanol	0.995789	0.00421093	298	4.00E+06	TRUE	82.39475763	30.03015604	121.115	44.1424	73.28869993	26.71130007	0.893338	4708.258864	20.31899
OPT_apo_sym_6_mc_3_sym_3_on_2_2B_4F	apo	methane	methanol	0.997189	0.00281124	298	6.00E+06	FALSE	122.2310566	0.444917405	179.6718	0.654	99.63732311	0.362676888	0.893338	4708.258864	20.31899
OPT_apo_sym_6_mc_3_sym_3_on_2_2B_4F	apo	methane	methanol	0.997189	0.00281124	298	6.00E+06	TRUE	118.7042357	17.266605	174.4876	25.3808	87.30124422	12.69875578	0.893338	4708.258864	20.31899
OPT_apo_sym_6_mc_3_sym_3_on_2_2B_4F	apo	methane	methanol	0.99789	0.00210991	298	8.00E+06	FALSE	152.1105938	0.32504822	223.5928	0.4778	99.78676364	0.213236364	0.893338	4708.258864	20.31899
OPT_apo_sym_6_mc_3_sym_3_on_2_2B_4F	apo	methane	methanol	0.99789	0.00210991	298	8.00E+06	TRUE	148.4954698	14.40906514	218.2788	21.1804	91.15490238	8.84509762	0.893338	4708.258864	20.31899
OPT_apo_sym_6_mc_3_sym_3_on_2_2B_4F	apo	methane	methanol	0.998311	0.00168864	298	1.00E+07	FALSE	176.4560116	0.218512952	259.379	0.3212	99.87631892	0.123681075	0.893338	4708.258864	20.31899
OPT_apo_sym_6_mc_3_sym_3_on_2_2B_4F	apo	methane	methanol	0.998311	0.00168864	298	1.00E+07	TRUE	174.9201621	6.637705076	257.1214	9.757	96.34402784	3.655972158	0.893338	4708.258864	20.31899
OPT_apo_sym_6_mc_3_sym_3_on_2_2B_4H	apo	methane	22-dimethylbutane	0.989153	0.0108468	298	4.00E+06	FALSE	86.16330788	13.34282549	127.4934	19.743	86.59095169	13.40904831	0.921243	6669.891933	22.02184
OPT_apo_sym_6_mc_3_sym_3_on_2_2B_4H	apo	methane	22-dimethylbutane	0.992743	0.00725744	298	6.00E+06	FALSE	119.581669	8.564332764	176.9416	12.6724	93.31673822	6.683261784	0.921243	6669.891933	22.02184
OPT_apo_sym_6_mc_3_sym_3_on_2_2B_4H	apo	methane	22-dimethylbutane	0.994547	0.00545297	298	8.00E+06	FALSE	149.2594704	5.817777388	220.855	8.6084	96.2484649	3.751535103	0.921243	6669.891933	22.02184
OPT_apo_sym_6_mc_3_sym_3_on_2_2B_4H	apo	methane	22-dimethylbutane	0.995633	0.00436714	298	1.00E+07	FALSE	177.1126777	4.084690132	262.0686	6.044	97.74572325	2.254276748	0.921243	6669.891933	22.02184
OPT_apo_sym_6_mc_3_sym_3_on_2_2B_4H	apo	methane	methanol	0.995789	0.00421093	298	4.00E+06	FALSE	84.73123337	0.582291366	125.3744	0.8616	99.31746887	0.682531132	0.921243	6669.891933	22.02184
OPT_apo_sym_6_mc_3_sym_3_on_2_2B_4H	apo	methane	methanol	0.995789	0.00421093	298	4.00E+06	TRUE	83.68613661	2.747907028	123.828	4.066	96.82080473	3.179195271	0.921243	6669.891933	22.02184
OPT_apo_sym_6_mc_3_sym_3_on_2_2B_4H	apo	methane	methanol	0.997189	0.00281124	298	6.00E+06	FALSE	119.0599316	0.385220611	176.1696	0.57	99.67749163	0.322508368	0.921243	6669.891933	22.02184
OPT_apo_sym_6_mc_3_sym_3_on_2_2B_4H	apo	methane	methanol	0.997189	0.00281124	298	6.00E+06	TRUE	118.6340263	3.618640775	175.5394	5.3544	97.04003122	2.959968777	0.921243	6669.891933	22.02184
OPT_apo_sym_6_mc_3_sym_3_on_2_2B_4H	apo	methane	methanol	0.99789	0.00210991	298	8.00E+06	FALSE	150.3318705	0.263436832	222.4418	0.3898	99.82506969	0.174930306	0.921243	6669.891933	22.02184
OPT_apo_sym_6_mc_3_sym_3_on_2_2B_4H	apo	methane	methanol	0.99789	0.00210991	298	8.00E+06	TRUE	149.3111035	0.846944685	220.9314	1.2532	99.43596451	0.564035491	0.921243	6669.891933	22.02184
OPT_apo_sym_6_mc_3_sym_3_on_2_2B_4H	apo	methane	methanol	0.998311	0.00168864	298	1.00E+07	FALSE	176.0074325	0.205721323	260.4332	0.3044	99.88325428	0.116745724	0.921243	6669.891933	22.02184
OPT_apo_sym_6_mc_3_sym_3_on_2_2B_4H	apo	methane	methanol	0.998311	0.00168864	298	1.00E+07	TRUE	174.4499247	0.648116783	258.1286	0.959	99.62985492	0.370145078	0.921243	6669.891933	22.02184
OPT_apo_sym_6_mc_3_sym_3_on_2_ntn_edge	apo	methane	22-dimethylbutane	0.989153	0.0108468	298	4.00E+06	FALSE	48.99820123	73.98749817	45.2702	68.3582	39.84056803	60.15943197	0.702115	1433.878027	6.7986
OPT_apo_sym_6_mc_3_sym_3_on_2_ntn_edge	apo	methane	22-dimethylbutane	0.992743	0.00725744	298	6.00E+06	FALSE	66.55976302	67.30658452	61.4956	62.1856	49.72105704	50.27894296	0.702115	1433.878027	6.7986
OPT_apo_sym_6_mc_3_sym_3_on_2_ntn_edge	apo	methane	22-dimethylbutane	0.994547	0.00545297	298	8.00E+06	FALSE	72.19815714	65.90385892	66.705	60.8896	52.2788582	47.7211418	0.702115	1433.878027	6.7986
OPT_apo_sym_6_mc_3_sym_3_on_2_ntn_edge	apo	methane	22-dimethylbutane	0.995633	0.00436714	298	1.00E+07	FALSE	79.27542736	63.90107846	73.2438	59.0392	55.36901945	44.63098055	0.702115	1433.878027	6.7986
OPT_apo_sym_6_mc_3_sym_3_on_2_ntn_edge	apo	methane	methanol	0.995789	0.00421093	298	4.00E+06	FALSE	136.1624448	69.39681885	125.8026	64.1168	66.23999444	33.76000556	0.702115	1433.878027	6.7986
OPT_apo_sym_6_mc_3_sym_3_on_2_ntn_edge	apo	methane	methanol	0.995789	0.00421093	298	4.00E+06	TRUE	16.10558456	246.3229461	14.8802	227.5816	6.137131705	93.8628683	0.702115	1433.878027	6.7986
OPT_apo_sym_6_mc_3_sym_3_on_2_ntn_edge	apo	methane	methanol	0.997189	0.00281124	298	6.00E+06	FALSE	183.6260902	22.643628	169.655	20.9208	89.02232078	10.97767922	0.702115	1433.878027	6.7986
OPT_apo_sym_6_mc_3_sym_3_on_2_ntn_edge	apo	methane	methanol	0.997189	0.00281124	298	6.00E+06	TRUE	30.68830266	235.6490268	28.3534	217.7198	11.52234376	88.47765624	0.702115	1433.878027	6.7986
OPT_apo_sym_6_mc_3_sym_3_on_2_ntn_edge	apo	methane	methanol	0.99789	0.00210991	298	8.00E+06	FALSE	205.2531751	3.247050018	189.6366	3	98.44266354	1.557336456	0.702115	1433.878027	6.7986
OPT_apo_sym_6_mc_3_sym_3_on_2_ntn_edge	apo	methane	methanol	0.99789	0.00210991	298	8.00E+06	TRUE	60.77655047	190.7873508	56.1524	176.2714	24.15948797	75.84051203	0.702115	1433.878027	6.7986
OPT_apo_sym_6_mc_3_sym_3_on_2_ntn_edge	apo	methane	methanol	0.998311	0.00168864	298	1.00E+07	FALSE	209.0554707	5.646187041	193.1496	5.2166	97.37021731	2.629782695	0.702115	1433.878027	6.7986
OPT_apo_sym_6_mc_3_sym_3_on_2_ntn_edge	apo	methane	methanol	0.998311	0.00168864	298	1.00E+07	TRUE	93.1448768	151.1309125	86.058	139.6322	38.13103094	61.86896906	0.702115	1433.878027	6.7986
OPT_bcu_sym_8_mc_9_1B_2Br	bcu	methane	22-dimethylbutane	0.989153	0.0108468	298	4.00E+06	FALSE	8.495553148	55.90544288	7.117	46.8338	13.19164869	86.80835131	0.410884	261.5489	6.37792
OPT_bcu_sym_8_mc_9_1B_2Br	bcu	methane	22-dimethylbutane	0.992743	0.00725744	298	6.00E+06	FALSE	12.63004772	54.92541631	10.5806	46.0128	18.69581965	81.30418035	0.410884	261.5489	6.37792
OPT_bcu_sym_8_mc_9_1B_2Br	bcu	methane	22-dimethylbutane	0.994547	0.00545297	298	8.00E+06	FALSE	20.65552235	50.94610256	17.3038	42.6792	28.84784022	71.15215978	0.410884	261.5489	6.37792
OPT_bcu_sym_8_mc_9_1B_2Br	bcu	methane	22-dimethylbutane	0.995633	0.00436714	298	1.00E+07	FALSE	29.35973402	45.84686075	24.5956	38.4074	39.03877593	60.96122407	0.410884	261.5489	6.37792
OPT_bcu_sym_8_mc_9_1B_2Br	bcu	methane	methanol	0.995789	0.00421093	298	4.00E+06	FALSE	97.67104802	6.257606957	81.8222	5.2422	93.97893973	6.021060273	0.410884	261.5489	6.37792
OPT_bcu_sym_8_mc_9_1B_2Br	bcu	methane	methanol	0.995789	0.00421093	298	4.00E+06	TRUE	4.922574409	176.9264298	4.1238	148.217	2.706957033	97.29304297	0.410884	261.5489	6.37792
OPT_bcu_sym_8_mc_9_1B_2Br	bcu	methane	methanol	0.997189	0.00281124	298	6.00E+06	FALSE	109.1995506	1.721313424	91.48	1.442	98.44816082	1.551839177	0.410884	261.5489	6.37792
OPT_bcu_sym_8_mc_9_1B_2Br	bcu	methane	methanol	0.997189	0.00281124	298	6.00E+06	TRUE	4.420504766	177.6395454	3.7032	148.8144	2.428047648	97.57195235	0.410884	261.5489	6.37792
OPT_bcu_sym_8_mc_9_1B_2Br	bcu	methane	methanol	0.99789	0.00210991	298	8.00E+06	FALSE	114.4924104	0.829859287	95.914	0.6952	99.2803998	0.719600204	0.410884	261.5489	6.37792
OPT_bcu_sym_8_mc_9_1B_2Br	bcu	methane	methanol	0.99789	0.00210991	298	8.00E+06	TRUE	7.616990956	166.7248426	6.381	139.6708	4.368997849	95.63100215	0.410884	261.5489	6.37792
OPT_bcu_sym_8_mc_9_1B_2Br	bcu	methane	methanol	0.998311	0.00168864	298	1.00E+07	FALSE	118.3237055	0.424479233	99.1236	0.3556	99.64253834	0.35746166	0.410884	261.5489	6.37792
OPT_bcu_sym_8_mc_9_1B_2Br	bcu	methane	methanol	0.998311	0.00168864	298	1.00E+07	TRUE	9.456480544	169.4830026	7.922	141.9814	5.284736704	94.7152633	0.410884	261.5489	6.37792
OPT_bcu_sym_8_mc_9_1B_2CH3	bcu	methane	22-dimethylbutane	0.989153	0.0108468	298	4.00E+06	FALSE	37.97676629	18.60239601	31.996	15.6728	67.12147149	32.87852851	0.345225	255.155555	7.23997
OPT_bcu_sym_8_mc_9_1B_2CH3	bcu	methane	22-dimethylbutane	0.992743	0.00725744	298	6.00E+06	FALSE	43.63506234	18.29023544	36.7632	15.4098	70.46403312	29.53596688	0.345225	255.155555	7.23997
OPT_bcu_sym_8_mc_9_1B_2CH3	bcu	methane	22-dimethylbutane	0.994547	0.00545297	298	8.00E+06	FALSE	58.52856351	14.78406693	49.3112	12.4558	79.83421568	20.16578432	0.345225	255.155555	7.23997
OPT_bcu_sym_8_mc_9_1B_2CH3	bcu	methane	22-dimethylbutane	0.995633	0.00436714	298	1.00E+07	FALSE	72.48392128	11.77165811	61.0688	9.9178	86.02863076	13.97136924	0.345225	255.155555	7.23997
OPT_bcu_sym_8_mc_9_1B_2CH3	bcu	methane	methanol	0.995789	0.00421093	298	4.00E+06	FALSE	82.52148589	1.323655762	69.5256	1.1152	98.42130893	1.578691068	0.345225	255.155555	7.23997
OPT_bcu_sym_8_mc_9_1B_2CH3	bcu	methane	methanol	0.995789	0.00421093	298	4.00E+06	TRUE	0.248304148	211.524986	0.2092	178.213	0.117249983	99.88275002	0.345225	255.155555	7.23997
OPT_bcu_sym_8_mc_9_1B_2CH3	bcu	methane	methanol	0.997189	0.00281124	298	6.00E+06	FALSE	94.31878152	0.712153387	79.465	0.6	99.25060888	0.74939112	0.345225	255.155555	7.23997
OPT_bcu_sym_8_mc_9_1B_2CH3	bcu	methane	methanol	0.997189	0.00281124	298	6.00E+06	TRUE	1.145142647	204.998575	0.9648	172.7144	0.555506935	99.44449307	0.345225	255.155555	7.23997
OPT_bcu_sym_8_mc_9_1B_2CH3	bcu	methane	methanol	0.99789	0.00210991	298	8.00E+06	FALSE	101.724702	0.332338247	85.7046	0.28	99.67436029	0.325639708	0.345225	255.155555	7.23997
OPT_bcu_sym_8_mc_9_1B_2CH3	bcu	methane	methanol	0.99789	0.00210991	298	8.00E+06	TRUE	0.618386525	206.21066	0.521	173.7356	0.298984371	99.70101563	0.345225	255.155555	7.23997
OPT_bcu_sym_8_mc_9_1B_2CH3	bcu	methane	methanol	0.998311	0.00168864	298	1.00E+07	FALSE	107.7324279	0.197503873	90.7662	0.1664	99.81700732	0.182992678	0.345225	255.155555	7.23997
OPT_bcu_sym_8_mc_9_1B_2CH3	bcu	methane	methanol	0.998311	0.00168864	298	1.00E+07	TRUE	1.967679809	201.2068329	1.6578	169.5198	0.968467837	99.03153216	0.345225	255.155555	7.23997
OPT_bcu_sym_8_mc_9_1B_2CN	bcu	methane	22-dimethylbutane	0.989153	0.0108468	298	4.00E+06	FALSE	33.97025491	37.67326852	28.5228	31.632	47.41566758	52.58433242	0.397347	270.020204	5.8022
OPT_bcu_sym_8_mc_9_1B_2CN	bcu	methane	22-dimethylbutane	0.992743	0.00725744	298	6.00E+06	FALSE	39.49976462	36.4008191	33.1656	30.5636	52.04145039	47.95854961	0.397347	270.020204	5.8022
OPT_bcu_sym_8_mc_9_1B_2CN	bcu	methane	22-dimethylbutane	0.994547	0.00545297	298	8.00E+06	FALSE	48.35617456	33.93023778	40.6018	28.4892	58.76568583	41.23431417	0.397347	270.020204	5.8022
OPT_bcu_sym_8_mc_9_1B_2CN	bcu	methane	22-dimethylbutane	0.995633	0.00436714	298	1.00E+07	FALSE	56.22406614	30.97873633	47.208	26.011	64.47506795	35.52493205	0.397347	270.020204	5.8022
OPT_bcu_sym_8_mc_9_1B_2CN	bcu	methane	methanol	0.995789	0.00421093	298	4.00E+06	FALSE	99.80843628	9.39449741	83.8032	7.888	91.39721151	8.60278849	0.397347	270.020204	5.8022
OPT_bcu_sym_8_mc_9_1B_2CN	bcu	methane	methanol	0.995789	0.00421093	298	4.00E+06	TRUE	3.069647265	178.8756135	2.5774	150.1912	1.687126805	98.3128732	0.397347	270.020204	5.8022
OPT_bcu_sym_8_mc_9_1B_2CN	bcu	methane	methanol	0.997189	0.00281124	298	6.00E+06	FALSE	112.8937992	1.041874535	94.7902	0.8748	99.08555898	0.914441018	0.397347	270.020204	5.8022
OPT_bcu_sym_8_mc_9_1B_2CN	bcu	methane	methanol	0.997189	0.00281124	298	6.00E+06	TRUE	5.151967152	169.7007339	4.3258	142.4876	2.94646129	97.05353871	0.397347	270.020204	5.8022
OPT_bcu_sym_8_mc_9_1B_2CN	bcu	methane	methanol	0.99789	0.00210991	298	8.00E+06	FALSE	119.6678893	0.700299756	100.478	0.588	99.41820197	0.581798033	0.397347	270.020204	5.8022
OPT_bcu_sym_8_mc_9_1B_2CN	bcu	methane	methanol	0.99789	0.00210991	298	8.00E+06	TRUE	7.255248393	167.8263602	6.0918	140.9138	4.143923769	95.85607623	0.397347	270.020204	5.8022
OPT_bcu_sym_8_mc_9_1B_2CN	bcu	methane	methanol	0.998311	0.00168864	298	1.00E+07	FALSE	124.1679107	0.371587626	104.2564	0.312	99.7016307	0.298369297	0.397347	270.020204	5.8022
OPT_bcu_sym_8_mc_9_1B_2CN	bcu	methane	methanol	0.998311	0.00168864	298	1.00E+07	TRUE	11.86079118	163.78201	9.9588	137.518	6.752790947	93.24720905	0.397347	270.020204	5.8022
OPT_bcu_sym_8_mc_9_1B_2F	bcu	methane	22-dimethylbutane	0.989153	0.0108468	298	4.00E+06	FALSE	9.152301358	57.02320567	7.6936	47.9348	13.83034565	86.16965435	0.488037	512.909793	6.65477
OPT_bcu_sym_8_mc_9_1B_2F	bcu	methane	22-dimethylbutane	0.992743	0.00725744	298	6.00E+06	FALSE	11.1122852	56.92470685	9.3412	47.852	16.33271088	83.66728912	0.488037	512.909793	6.65477
OPT_bcu_sym_8_mc_9_1B_2F	bcu	methane	22-dimethylbutane	0.994547	0.00545297	298	8.00E+06	FALSE	14.66228751	56.32705214	12.3254	47.3496	20.65421031	79.34578969	0.488037	512.909793	6.65477
OPT_bcu_sym_8_mc_9_1B_2F	bcu	methane	22-dimethylbutane	0.995633	0.00436714	298	1.00E+07	FALSE	18.92557356	54.82363652	15.9092	46.0858	25.66206952	74.33793048	0.488037	512.909793	6.65477
OPT_bcu_sym_8_mc_9_1B_2F	bcu	methane	methanol	0.995789	0.00421093	298	4.00E+06	FALSE	107.6830066	2.548359672	90.5204	2.1422	97.68817193	2.311828073	0.488037	512.909793	6.65477
OPT_bcu_sym_8_mc_9_1B_2F	bcu	methane	methanol	0.995789	0.00421093	298	4.00E+06	TRUE	0.902192127	223.8735518	0.7584	188.1924	0.401374326	99.59862567	0.488037	512.909793	6.65477
OPT_bcu_sym_8_mc_9_1B_2F	bcu	methane	methanol	0.997189	0.00281124	298	6.00E+06	FALSE	117.1545965	1.216246349	98.4824	1.0224	98.97251188	1.027488121	0.488037	512.909793	6.65477
OPT_bcu_sym_8_mc_9_1B_2F	bcu	methane	methanol	0.997189	0.00281124	298	6.00E+06	TRUE	2.122245194	220.431803	1.784	185.2992	0.953586426	99.04641357	0.488037	512.909793	6.65477
OPT_bcu_sym_8_mc_9_1B_2F	bcu	methane	methanol	0.99789	0.00210991	298	8.00E+06	FALSE	124.2729209	0.496062918	104.4662	0.417	99.60241488	0.397585123	0.488037	512.909793	6.65477
OPT_bcu_sym_8_mc_9_1B_2F	bcu	methane	methanol	0.99789	0.00210991	298	8.00E+06	TRUE	4.505488479	220.0770645	3.7874	185.001	2.006161396	97.9938386	0.488037	512.909793	6.65477
OPT_bcu_sym_8_mc_9_1B_2F	bcu	methane	methanol	0.998311	0.00168864	298	1.00E+07	FALSE	127.6915914	0.360210675	107.34	0.3028	99.71869925	0.281300747	0.488037	512.909793	6.65477
OPT_bcu_sym_8_mc_9_1B_2F	bcu	methane	methanol	0.998311	0.00168864	298	1.00E+07	TRUE	6.058867276	218.3678482	5.0932	183.5642	2.699708572	97.30029143	0.488037	512.909793	6.65477
OPT_bcu_sym_8_mc_9_1B_2NH2	bcu	methane	22-dimethylbutane	0.989153	0.0108468	298	4.00E+06	FALSE	47.2328388	32.55017567	39.4728	27.2024	59.20162219	40.79837781	0.402588	395.758355	7.95713
OPT_bcu_sym_8_mc_9_1B_2NH2	bcu	methane	22-dimethylbutane	0.992743	0.00725744	298	6.00E+06	FALSE	60.04307468	28.27188044	50.1784	23.627	67.98743723	32.01256277	0.402588	395.758355	7.95713
OPT_bcu_sym_8_mc_9_1B_2NH2	bcu	methane	22-dimethylbutane	0.994547	0.00545297	298	8.00E+06	FALSE	72.88298605	24.3001521	60.9088	20.3078	74.99550584	25.00449416	0.402588	395.758355	7.95713
OPT_bcu_sym_8_mc_9_1B_2NH2	bcu	methane	22-dimethylbutane	0.995633	0.00436714	298	1.00E+07	FALSE	84.94319803	20.47823708	70.9876	17.1138	80.57488303	19.42511697	0.402588	395.758355	7.95713
OPT_bcu_sym_8_mc_9_1B_2NH2	bcu	methane	methanol	0.995789	0.00421093	298	4.00E+06	FALSE	104.2538006	12.22964942	87.1256	10.2204	89.50095536	10.49904464	0.402588	395.758355	7.95713
OPT_bcu_sym_8_mc_9_1B_2NH2	bcu	methane	methanol	0.995789	0.00421093	298	4.00E+06	TRUE	0.040923448	259.9450251	0.0342	217.2378	0.015740638	99.98425936	0.402588	395.758355	7.95713
OPT_bcu_sym_8_mc_9_1B_2NH2	bcu	methane	methanol	0.997189	0.00281124	298	6.00E+06	FALSE	122.7641224	1.939197081	102.5948	1.6206	98.44495151	1.555048486	0.402588	395.758355	7.95713
OPT_bcu_sym_8_mc_9_1B_2NH2	bcu	methane	methanol	0.997189	0.00281124	298	6.00E+06	TRUE	0.085197354	261.1085912	0.0712	218.2102	0.032618446	99.96738155	0.402588	395.758355	7.95713
OPT_bcu_sym_8_mc_9_1B_2NH2	bcu	methane	methanol	0.99789	0.00210991	298	8.00E+06	FALSE	130.7140407	0.622706505	109.2386	0.5204	99.52587032	0.474129684	0.402588	395.758355	7.95713
OPT_bcu_sym_8_mc_9_1B_2NH2	bcu	methane	methanol	0.99789	0.00210991	298	8.00E+06	TRUE	0.250327058	258.365045	0.2092	215.9174	0.096795119	99.90320488	0.402588	395.758355	7.95713
OPT_bcu_sym_8_mc_9_1B_2NH2	bcu	methane	methanol	0.998311	0.00168864	298	1.00E+07	FALSE	137.0016533	0.339114188	114.4932	0.2834	99.75308556	0.246914441	0.402588	395.758355	7.95713
OPT_bcu_sym_8_mc_9_1B_2NH2	bcu	methane	methanol	0.998311	0.00168864	298	1.00E+07	TRUE	0.592552385	258.1094529	0.4952	215.7038	0.229048238	99.77095176	0.402588	395.758355	7.95713
OPT_bcu_sym_8_mc_9_1B_2NO2	bcu	methane	22-dimethylbutane	0.989153	0.0108468	298	4.00E+06	FALSE	59.94202213	18.47763109	50.4142	15.5406	76.43749962	23.56250038	0.348094	233.712246	6.0677
OPT_bcu_sym_8_mc_9_1B_2NO2	bcu	methane	22-dimethylbutane	0.992743	0.00725744	298	6.00E+06	FALSE	65.3333822	17.20255731	54.9486	14.4682	79.15749502	20.84250498	0.348094	233.712246	6.0677
OPT_bcu_sym_8_mc_9_1B_2NO2	bcu	methane	22-dimethylbutane	0.994547	0.00545297	298	8.00E+06	FALSE	71.21983806	15.47067324	59.8994	13.0116	82.15413312	17.84586688	0.348094	233.712246	6.0677
OPT_bcu_sym_8_mc_9_1B_2NO2	bcu	methane	22-dimethylbutane	0.995633	0.00436714	298	1.00E+07	FALSE	82.13667638	11.39457484	69.081	9.5834	87.81736084	12.18263916	0.348094	233.712246	6.0677
OPT_bcu_sym_8_mc_9_1B_2NO2	bcu	methane	methanol	0.995789	0.00421093	298	4.00E+06	FALSE	94.71976647	2.262173977	79.664	1.9026	97.6674276	2.332572401	0.348094	233.712246	6.0677
OPT_bcu_sym_8_mc_9_1B_2NO2	bcu	methane	methanol	0.995789	0.00421093	298	4.00E+06	TRUE	0.023066422	216.1758944	0.0194	181.8146	0.010669072	99.98933093	0.348094	233.712246	6.0677
OPT_bcu_sym_8_mc_9_1B_2NO2	bcu	methane	methanol	0.997189	0.00281124	298	6.00E+06	FALSE	100.8050216	0.992569555	84.782	0.8348	99.02495772	0.975042281	0.348094	233.712246	6.0677
OPT_bcu_sym_8_mc_9_1B_2NO2	bcu	methane	methanol	0.997189	0.00281124	298	6.00E+06	TRUE	0.018548257	216.6379363	0.0156	182.2032	0.008561136	99.99143886	0.348094	233.712246	6.0677
OPT_bcu_sym_8_mc_9_1B_2NO2	bcu	methane	methanol	0.99789	0.00210991	298	8.00E+06	FALSE	104.7757754	0.693657257	88.1216	0.5834	99.34231441	0.657685587	0.348094	233.712246	6.0677
OPT_bcu_sym_8_mc_9_1B_2NO2	bcu	methane	methanol	0.99789	0.00210991	298	8.00E+06	TRUE	0.131740185	214.1127575	0.1108	180.0794	0.061490581	99.93850942	0.348094	233.712246	6.0677
OPT_bcu_sym_8_mc_9_1B_2NO2	bcu	methane	methanol	0.998311	0.00168864	298	1.00E+07	FALSE	105.9103105	0.302003674	89.0758	0.254	99.7156604	0.284339604	0.348094	233.712246	6.0677
OPT_bcu_sym_8_mc_9_1B_2NO2	bcu	methane	methanol	0.998311	0.00168864	298	1.00E+07	TRUE	0.190714131	216.3364082	0.1604	181.9496	0.088078634	99.91192137	0.348094	233.712246	6.0677
OPT_bcu_sym_8_mc_9_1B_2OH	bcu	methane	22-dimethylbutane	0.989153	0.0108468	298	4.00E+06	FALSE	16.31989156	56.49142422	13.8364	47.8948	22.41394951	77.58605049	0.47015	470.307184	7.04588
OPT_bcu_sym_8_mc_9_1B_2OH	bcu	methane	22-dimethylbutane	0.992743	0.00725744	298	6.00E+06	FALSE	21.30229203	55.93022301	18.0606	47.419	27.58202555	72.41797445	0.47015	470.307184	7.04588
OPT_bcu_sym_8_mc_9_1B_2OH	bcu	methane	22-dimethylbutane	0.994547	0.00545297	298	8.00E+06	FALSE	24.31895494	55.29188317	20.6182	46.8778	30.54729169	69.45270831	0.47015	470.307184	7.04588
OPT_bcu_sym_8_mc_9_1B_2OH	bcu	methane	22-dimethylbutane	0.995633	0.00436714	298	1.00E+07	FALSE	31.74738119	53.49504854	26.9162	45.3544	37.24363711	62.75636289	0.47015	470.307184	7.04588
OPT_bcu_sym_8_mc_9_1B_2OH	bcu	methane	methanol	0.995789	0.00421093	298	4.00E+06	FALSE	113.1897309	4.818215504	95.965	4.085	95.91704148	4.082958521	0.47015	470.307184	7.04588
OPT_bcu_sym_8_mc_9_1B_2OH	bcu	methane	methanol	0.995789	0.00421093	298	4.00E+06	TRUE	3.582110278	193.1353082	3.037	163.7448	1.820942093	98.17905791	0.47015	470.307184	7.04588
OPT_bcu_sym_8_mc_9_1B_2OH	bcu	methane	methanol	0.997189	0.00281124	298	6.00E+06	FALSE	125.7050605	1.654824077	106.5758	1.403	98.70067087	1.299329128	0.47015	470.307184	7.04588
OPT_bcu_sym_8_mc_9_1B_2OH	bcu	methane	methanol	0.997189	0.00281124	298	6.00E+06	TRUE	6.150095296	186.0423289	5.2142	157.7312	3.199967597	96.8000324	0.47015	470.307184	7.04588
OPT_bcu_sym_8_mc_9_1B_2OH	bcu	methane	methanol	0.99789	0.00210991	298	8.00E+06	FALSE	133.24601	0.595878206	112.9692	0.5052	99.55478945	0.44521055	0.47015	470.307184	7.04588
OPT_bcu_sym_8_mc_9_1B_2OH	bcu	methane	methanol	0.99789	0.00210991	298	8.00E+06	TRUE	7.210220656	185.4768815	6.113	157.2518	3.741932167	96.25806783	0.47015	470.307184	7.04588
OPT_bcu_sym_8_mc_9_1B_2OH	bcu	methane	methanol	0.998311	0.00168864	298	1.00E+07	FALSE	135.8434823	0.427211176	115.1714	0.3622	99.68649813	0.313501873	0.47015	470.307184	7.04588
OPT_bcu_sym_8_mc_9_1B_2OH	bcu	methane	methanol	0.998311	0.00168864	298	1.00E+07	TRUE	10.38257621	175.8864506	8.8026	149.1208	5.573968139	94.42603186	0.47015	470.307184	7.04588
OPT_bcu_sym_8_mc_9_1B_2SH	bcu	methane	22-dimethylbutane	0.989153	0.0108468	298	4.00E+06	FALSE	57.54527005	19.15117851	48.5532	16.1586	75.02990181	24.97009819	0.368954	208.790851	6.9819
OPT_bcu_sym_8_mc_9_1B_2SH	bcu	methane	22-dimethylbutane	0.992743	0.00725744	298	6.00E+06	FALSE	63.43453063	18.72379526	53.5222	15.798	77.21010615	22.78989385	0.368954	208.790851	6.9819
OPT_bcu_sym_8_mc_9_1B_2SH	bcu	methane	22-dimethylbutane	0.994547	0.00545297	298	8.00E+06	FALSE	68.6961091	17.81996147	57.9616	15.0354	79.40271518	20.59728482	0.368954	208.790851	6.9819
OPT_bcu_sym_8_mc_9_1B_2SH	bcu	methane	22-dimethylbutane	0.995633	0.00436714	298	1.00E+07	FALSE	71.1852669	17.56063963	60.0618	14.8166	80.21245112	19.78754888	0.368954	208.790851	6.9819
OPT_bcu_sym_8_mc_9_1B_2SH	bcu	methane	methanol	0.995789	0.00421093	298	4.00E+06	FALSE	97.60053841	1.540760466	82.3494	1.3	98.44589441	1.554105588	0.368954	208.790851	6.9819
OPT_bcu_sym_8_mc_9_1B_2SH	bcu	methane	methanol	0.995789	0.00421093	298	4.00E+06	TRUE	4.631525961	154.9080573	3.9078	130.702	2.903057578	97.09694242	0.368954	208.790851	6.9819
OPT_bcu_sym_8_mc_9_1B_2SH	bcu	methane	methanol	0.997189	0.00281124	298	6.00E+06	FALSE	107.1658164	1.012398146	90.42	0.8542	99.06413861	0.935861393	0.368954	208.790851	6.9819
OPT_bcu_sym_8_mc_9_1B_2SH	bcu	methane	methanol	0.997189	0.00281124	298	6.00E+06	TRUE	6.829598546	151.9829828	5.7624	128.234	4.300414041	95.69958596	0.368954	208.790851	6.9819
OPT_bcu_sym_8_mc_9_1B_2SH	bcu	methane	methanol	0.99789	0.00210991	298	8.00E+06	FALSE	113.0569733	0.409131164	95.3906	0.3452	99.63942433	0.360575668	0.368954	208.790851	6.9819
OPT_bcu_sym_8_mc_9_1B_2SH	bcu	methane	methanol	0.99789	0.00210991	298	8.00E+06	TRUE	11.46468011	147.7627213	9.6732	124.6732	7.200192934	92.79980707	0.368954	208.790851	6.9819
OPT_bcu_sym_8_mc_9_1B_2SH	bcu	methane	methanol	0.998311	0.00168864	298	1.00E+07	FALSE	116.8507997	0.266196001	98.5916	0.2246	99.77270933	0.227290667	0.368954	208.790851	6.9819
OPT_bcu_sym_8_mc_9_1B_2SH	bcu	methane	methanol	0.998311	0.00168864	298	1.00E+07	TRUE	15.68588971	138.7260427	13.2348	117.0486	10.15846992	89.84153008	0.368954	208.790851	6.9819
OPT_bcu_sym_8_mc_9_1B_4Br	bcu	methane	22-dimethylbutane	0.989153	0.0108468	298	4.00E+06	FALSE	40.85492683	18.62686777	34.7152	15.8276	68.68475826	31.31524174	0.336918	188.441083	6.7228
OPT_bcu_sym_8_mc_9_1B_4Br	bcu	methane	22-dimethylbutane	0.992743	0.00725744	298	6.00E+06	FALSE	46.54786892	17.91486753	39.5526	15.2226	72.20895588	27.79104412	0.336918	188.441083	6.7228
OPT_bcu_sym_8_mc_9_1B_4Br	bcu	methane	22-dimethylbutane	0.994547	0.00545297	298	8.00E+06	FALSE	48.44237799	17.24876482	41.1624	14.6566	73.74263244	26.25736756	0.336918	188.441083	6.7228
OPT_bcu_sym_8_mc_9_1B_4Br	bcu	methane	22-dimethylbutane	0.995633	0.00436714	298	1.00E+07	FALSE	52.21750918	17.2329949	44.3702	14.6432	75.18665252	24.81334748	0.336918	188.441083	6.7228
OPT_bcu_sym_8_mc_9_1B_4Br	bcu	methane	methanol	0.995789	0.00421093	298	4.00E+06	FALSE	71.95156674	19.60507372	61.1386	16.6588	78.58694507	21.41305493	0.336918	188.441083	6.7228
OPT_bcu_sym_8_mc_9_1B_4Br	bcu	methane	methanol	0.995789	0.00421093	298	4.00E+06	TRUE	0.603023013	144.1140268	0.5124	122.4564	0.416691063	99.58330894	0.336918	188.441083	6.7228
OPT_bcu_sym_8_mc_9_1B_4Br	bcu	methane	methanol	0.997189	0.00281124	298	6.00E+06	FALSE	84.48324171	8.34064149	71.787	7.0872	91.01455229	8.985447713	0.336918	188.441083	6.7228
OPT_bcu_sym_8_mc_9_1B_4Br	bcu	methane	methanol	0.997189	0.00281124	298	6.00E+06	TRUE	4.064638726	142.6968521	3.4538	121.2522	2.769553991	97.23044601	0.336918	188.441083	6.7228
OPT_bcu_sym_8_mc_9_1B_4Br	bcu	methane	methanol	0.99789	0.00210991	298	8.00E+06	FALSE	94.89939332	0.729888511	80.6378	0.6202	99.23675207	0.763247926	0.336918	188.441083	6.7228
OPT_bcu_sym_8_mc_9_1B_4Br	bcu	methane	methanol	0.99789	0.00210991	298	8.00E+06	TRUE	2.944738844	145.2155676	2.5022	123.3924	1.987535605	98.01246439	0.336918	188.441083	6.7228
OPT_bcu_sym_8_mc_9_1B_4Br	bcu	methane	methanol	0.998311	0.00168864	298	1.00E+07	FALSE	92.45223084	5.091095932	78.5584	4.326	94.78068249	5.219317507	0.336918	188.441083	6.7228
OPT_bcu_sym_8_mc_9_1B_4Br	bcu	methane	methanol	0.998311	0.00168864	298	1.00E+07	TRUE	4.697083237	141.0758453	3.9912	119.8748	3.222191723	96.77780828	0.336918	188.441083	6.7228
OPT_bcu_sym_8_mc_9_1B_4CN	bcu	methane	22-dimethylbutane	0.989153	0.0108468	298	4.00E+06	FALSE	44.34844831	20.38714951	38.2964	17.605	68.50704991	31.49295009	0.303231	250.919303	6.59953
OPT_bcu_sym_8_mc_9_1B_4CN	bcu	methane	22-dimethylbutane	0.992743	0.00725744	298	6.00E+06	FALSE	52.99593483	18.17716166	45.7638	15.6966	74.46062831	25.53937169	0.303231	250.919303	6.59953
OPT_bcu_sym_8_mc_9_1B_4CN	bcu	methane	22-dimethylbutane	0.994547	0.00545297	298	8.00E+06	FALSE	58.10192856	16.85191009	50.173	14.5522	77.51694858	22.48305142	0.303231	250.919303	6.59953
OPT_bcu_sym_8_mc_9_1B_4CN	bcu	methane	22-dimethylbutane	0.995633	0.00436714	298	1.00E+07	FALSE	57.44694579	17.62385407	49.6074	15.2188	76.5236895	23.4763105	0.303231	250.919303	6.59953
OPT_bcu_sym_8_mc_9_1B_4CN	bcu	methane	methanol	0.995789	0.00421093	298	4.00E+06	FALSE	82.67142565	5.833006082	71.3896	5.037	93.40936271	6.590637291	0.303231	250.919303	6.59953
OPT_bcu_sym_8_mc_9_1B_4CN	bcu	methane	methanol	0.995789	0.00421093	298	4.00E+06	TRUE	0.026171518	180.6159009	0.0226	155.968	0.014488052	99.98551195	0.303231	250.919303	6.59953
OPT_bcu_sym_8_mc_9_1B_4CN	bcu	methane	methanol	0.997189	0.00281124	298	6.00E+06	FALSE	93.82165046	0.84791087	81.0182	0.7322	99.10434689	0.89565311	0.303231	250.919303	6.59953
OPT_bcu_sym_8_mc_9_1B_4CN	bcu	methane	methanol	0.997189	0.00281124	298	6.00E+06	TRUE	0.02478188	175.5703564	0.0214	151.611	0.014113079	99.98588692	0.303231	250.919303	6.59953
OPT_bcu_sym_8_mc_9_1B_4CN	bcu	methane	methanol	0.99789	0.00210991	298	8.00E+06	FALSE	98.12721262	0.466918414	84.7362	0.4032	99.52642372	0.473576276	0.303231	250.919303	6.59953
OPT_bcu_sym_8_mc_9_1B_4CN	bcu	methane	methanol	0.99789	0.00210991	298	8.00E+06	TRUE	0.018528509	174.789843	0.016	150.937	0.010599326	99.98940067	0.303231	250.919303	6.59953
OPT_bcu_sym_8_mc_9_1B_4CN	bcu	methane	methanol	0.998311	0.00168864	298	1.00E+07	FALSE	101.4475213	0.269821405	87.6034	0.233	99.73473412	0.265265881	0.303231	250.919303	6.59953
OPT_bcu_sym_8_mc_9_1B_4CN	bcu	methane	methanol	0.998311	0.00168864	298	1.00E+07	TRUE	0.03497256	176.0182831	0.0302	151.9978	0.019864762	99.98013524	0.303231	250.919303	6.59953
OPT_bcu_sym_8_mc_9_1B_4F	bcu	methane	22-dimethylbutane	0.989153	0.0108468	298	4.00E+06	FALSE	86.67923677	18.88625915	72.8516	15.8734	82.10943928	17.89056072	0.455051	366.70398	6.7605
OPT_bcu_sym_8_mc_9_1B_4F	bcu	methane	22-dimethylbutane	0.992743	0.00725744	298	6.00E+06	FALSE	92.5985193	18.27208153	77.8266	15.3572	83.51945295	16.48054705	0.455051	366.70398	6.7605
OPT_bcu_sym_8_mc_9_1B_4F	bcu	methane	22-dimethylbutane	0.994547	0.00545297	298	8.00E+06	FALSE	102.9017593	15.58526268	86.4862	13.099	86.84643903	13.15356097	0.455051	366.70398	6.7605
OPT_bcu_sym_8_mc_9_1B_4F	bcu	methane	22-dimethylbutane	0.995633	0.00436714	298	1.00E+07	FALSE	108.6837383	13.83029952	91.3458	11.624	88.7112532	11.2887468	0.455051	366.70398	6.7605
OPT_bcu_sym_8_mc_9_1B_4F	bcu	methane	methanol	0.995789	0.00421093	298	4.00E+06	FALSE	118.9243945	9.529628436	99.9528	8.0094	92.58129234	7.418707659	0.455051	366.70398	6.7605
OPT_bcu_sym_8_mc_9_1B_4F	bcu	methane	methanol	0.995789	0.00421093	298	4.00E+06	TRUE	2.053128428	208.7592335	1.7256	175.4566	0.973912729	99.02608727	0.455051	366.70398	6.7605
OPT_bcu_sym_8_mc_9_1B_4F	bcu	methane	methanol	0.997189	0.00281124	298	6.00E+06	FALSE	134.3721156	1.315448997	112.9362	1.1056	99.03053091	0.969469089	0.455051	366.70398	6.7605
OPT_bcu_sym_8_mc_9_1B_4F	bcu	methane	methanol	0.997189	0.00281124	298	6.00E+06	TRUE	2.836496391	207.3152855	2.384	174.243	1.349737016	98.65026298	0.455051	366.70398	6.7605
OPT_bcu_sym_8_mc_9_1B_4F	bcu	methane	methanol	0.99789	0.00210991	298	8.00E+06	FALSE	140.0753295	0.713407398	117.7296	0.5996	99.49327808	0.506721925	0.455051	366.70398	6.7605
OPT_bcu_sym_8_mc_9_1B_4F	bcu	methane	methanol	0.99789	0.00210991	298	8.00E+06	TRUE	4.489136276	203.4162928	3.773	170.966	2.159220323	97.84077968	0.455051	366.70398	6.7605
OPT_bcu_sym_8_mc_9_1B_4F	bcu	methane	methanol	0.998311	0.00168864	298	1.00E+07	FALSE	144.7303246	0.440703969	121.642	0.3704	99.6964243	0.303575702	0.455051	366.70398	6.7605
OPT_bcu_sym_8_mc_9_1B_4F	bcu	methane	methanol	0.998311	0.00168864	298	1.00E+07	TRUE	5.838375751	205.5950647	4.907	172.7972	2.761330346	97.23866965	0.455051	366.70398	6.7605
OPT_bcu_sym_8_mc_9_1B_4H	bcu	methane	22-dimethylbutane	0.989153	0.0108468	298	4.00E+06	FALSE	19.05450932	56.49238976	16.1206	47.794	25.22209323	74.77790677	0.51611	646.443038	7.69905
OPT_bcu_sym_8_mc_9_1B_4H	bcu	methane	22-dimethylbutane	0.992743	0.00725744	298	6.00E+06	FALSE	29.07217475	55.75293211	24.5958	47.1684	34.27307766	65.72692234	0.51611	646.443038	7.69905
OPT_bcu_sym_8_mc_9_1B_4H	bcu	methane	22-dimethylbutane	0.994547	0.00545297	298	8.00E+06	FALSE	35.55803158	54.0380901	30.083	45.7176	39.68702095	60.31297905	0.51611	646.443038	7.69905
OPT_bcu_sym_8_mc_9_1B_4H	bcu	methane	22-dimethylbutane	0.995633	0.00436714	298	1.00E+07	FALSE	42.18360051	53.09556527	35.6884	44.9202	44.27368792	55.72631208	0.51611	646.443038	7.69905
OPT_bcu_sym_8_mc_9_1B_4H	bcu	methane	methanol	0.995789	0.00421093	298	4.00E+06	FALSE	117.4089963	2.247213697	99.331	1.9012	98.12194144	1.878058562	0.51611	646.443038	7.69905
OPT_bcu_sym_8_mc_9_1B_4H	bcu	methane	methanol	0.995789	0.00421093	298	4.00E+06	TRUE	3.319049053	234.8726008	2.808	198.7082	1.393436359	98.60656364	0.51611	646.443038	7.69905
OPT_bcu_sym_8_mc_9_1B_4H	bcu	methane	methanol	0.997189	0.00281124	298	6.00E+06	FALSE	130.5022193	0.940633631	110.4082	0.7958	99.28437826	0.71562174	0.51611	646.443038	7.69905
OPT_bcu_sym_8_mc_9_1B_4H	bcu	methane	methanol	0.997189	0.00281124	298	6.00E+06	TRUE	4.439582708	232.499859	3.756	196.7008	1.873720423	98.12627958	0.51611	646.443038	7.69905
OPT_bcu_sym_8_mc_9_1B_4H	bcu	methane	methanol	0.99789	0.00210991	298	8.00E+06	FALSE	139.5043124	0.552229244	118.0242	0.4672	99.60570978	0.394290219	0.51611	646.443038	7.69905
OPT_bcu_sym_8_mc_9_1B_4H	bcu	methane	methanol	0.99789	0.00210991	298	8.00E+06	TRUE	7.3101819	223.5455185	6.1846	189.1252	3.166558975	96.83344103	0.51611	646.443038	7.69905
OPT_bcu_sym_8_mc_9_1B_4H	bcu	methane	methanol	0.998311	0.00168864	298	1.00E+07	FALSE	145.4684355	0.416772328	123.07	0.3526	99.71431488	0.285685118	0.51611	646.443038	7.69905
OPT_bcu_sym_8_mc_9_1B_4H	bcu	methane	methanol	0.998311	0.00168864	298	1.00E+07	TRUE	12.03651721	223.4819271	10.1832	189.0714	5.110647383	94.88935262	0.51611	646.443038	7.69905
OPT_ceq_sym_3_on_1_sym_7_mc_4_1B_2Br_ntn_edge	ceq	methane	22-dimethylbutane	0.989153	0.0108468	298	4.00E+06	FALSE	67.59512267	73.16585917	77.587	83.9812	48.02120714	51.97879286	0.718888	1824.458808	9.2913
OPT_ceq_sym_3_on_1_sym_7_mc_4_1B_2Br_ntn_edge	ceq	methane	22-dimethylbutane	0.992743	0.00725744	298	6.00E+06	FALSE	88.23913505	65.88945379	101.2826	75.6292	57.25033604	42.74966396	0.718888	1824.458808	9.2913
OPT_ceq_sym_3_on_1_sym_7_mc_4_1B_2Br_ntn_edge	ceq	methane	22-dimethylbutane	0.994547	0.00545297	298	8.00E+06	FALSE	99.37816865	63.23590069	114.0682	72.5834	61.11289697	38.88710303	0.718888	1824.458808	9.2913
OPT_ceq_sym_3_on_1_sym_7_mc_4_1B_2Br_ntn_edge	ceq	methane	22-dimethylbutane	0.995633	0.00436714	298	1.00E+07	FALSE	135.928689	47.59859885	156.0216	54.6346	74.06456587	25.93543413	0.718888	1824.458808	9.2913
OPT_ceq_sym_3_on_1_sym_7_mc_4_1B_2Br_ntn_edge	ceq	methane	methanol	0.995789	0.00421093	298	4.00E+06	FALSE	161.1887581	48.70190821	185.0156	55.901	76.79653457	23.20346543	0.718888	1824.458808	9.2913
OPT_ceq_sym_3_on_1_sym_7_mc_4_1B_2Br_ntn_edge	ceq	methane	methanol	0.995789	0.00421093	298	4.00E+06	TRUE	26.95145009	280.1867363	30.9354	321.6038	8.775024168	91.22497583	0.718888	1824.458808	9.2913
OPT_ceq_sym_3_on_1_sym_7_mc_4_1B_2Br_ntn_edge	ceq	methane	methanol	0.997189	0.00281124	298	6.00E+06	FALSE	202.6961554	6.942729227	232.6586	7.969	96.68824358	3.311756424	0.718888	1824.458808	9.2913
OPT_ceq_sym_3_on_1_sym_7_mc_4_1B_2Br_ntn_edge	ceq	methane	methanol	0.997189	0.00281124	298	6.00E+06	TRUE	63.60547099	231.2070841	73.0076	265.384	21.57488543	78.42511457	0.718888	1824.458808	9.2913
OPT_ceq_sym_3_on_1_sym_7_mc_4_1B_2Br_ntn_edge	ceq	methane	methanol	0.99789	0.00210991	298	8.00E+06	FALSE	217.4937781	2.923978897	249.6436	3.3562	98.67343769	1.326562313	0.718888	1824.458808	9.2913
OPT_ceq_sym_3_on_1_sym_7_mc_4_1B_2Br_ntn_edge	ceq	methane	methanol	0.99789	0.00210991	298	8.00E+06	TRUE	111.3303963	166.8717074	127.7872	191.5386	40.01781253	59.98218747	0.718888	1824.458808	9.2913
OPT_ceq_sym_3_on_1_sym_7_mc_4_1B_2Br_ntn_edge	ceq	methane	methanol	0.998311	0.00168864	298	1.00E+07	FALSE	226.5835348	2.981653471	260.077	3.4224	98.70117351	1.298826487	0.718888	1824.458808	9.2913
OPT_ceq_sym_3_on_1_sym_7_mc_4_1B_2Br_ntn_edge	ceq	methane	methanol	0.998311	0.00168864	298	1.00E+07	TRUE	141.9925344	128.4437142	162.9818	147.4302	52.50499336	47.49500664	0.718888	1824.458808	9.2913
OPT_ceq_sym_3_on_1_sym_7_mc_4_1B_2CF3_ntn_edge	ceq	methane	22-dimethylbutane	0.989153	0.0108468	298	4.00E+06	FALSE	43.34518783	73.6999325	49.582	84.3044	37.03288758	62.96711242	0.639643	1691.715496	8.32393
OPT_ceq_sym_3_on_1_sym_7_mc_4_1B_2CF3_ntn_edge	ceq	methane	22-dimethylbutane	0.992743	0.00725744	298	6.00E+06	FALSE	66.75396712	64.69729557	76.359	74.0064	50.78229433	49.21770567	0.639643	1691.715496	8.32393
OPT_ceq_sym_3_on_1_sym_7_mc_4_1B_2CF3_ntn_edge	ceq	methane	22-dimethylbutane	0.994547	0.00545297	298	8.00E+06	FALSE	80.68995817	59.59102228	92.3002	68.1654	57.5202411	42.4797589	0.639643	1691.715496	8.32393
OPT_ceq_sym_3_on_1_sym_7_mc_4_1B_2CF3_ntn_edge	ceq	methane	22-dimethylbutane	0.995633	0.00436714	298	1.00E+07	FALSE	103.9702283	49.19856284	118.9302	56.2776	67.87951221	32.12048779	0.639643	1691.715496	8.32393
OPT_ceq_sym_3_on_1_sym_7_mc_4_1B_2CF3_ntn_edge	ceq	methane	methanol	0.995789	0.00421093	298	4.00E+06	FALSE	145.5580748	39.94432765	166.502	45.6918	78.46694861	21.53305139	0.639643	1691.715496	8.32393
OPT_ceq_sym_3_on_1_sym_7_mc_4_1B_2CF3_ntn_edge	ceq	methane	methanol	0.995789	0.00421093	298	4.00E+06	TRUE	15.670428	261.4672438	17.9252	299.089	5.654383936	94.34561606	0.639643	1691.715496	8.32393
OPT_ceq_sym_3_on_1_sym_7_mc_4_1B_2CF3_ntn_edge	ceq	methane	methanol	0.997189	0.00281124	298	6.00E+06	FALSE	172.1037022	20.44362645	196.8672	23.3852	89.38254475	10.61745525	0.639643	1691.715496	8.32393
OPT_ceq_sym_3_on_1_sym_7_mc_4_1B_2CF3_ntn_edge	ceq	methane	methanol	0.997189	0.00281124	298	6.00E+06	TRUE	28.42710683	247.6809179	32.5174	283.319	10.29564673	89.70435327	0.639643	1691.715496	8.32393
OPT_ceq_sym_3_on_1_sym_7_mc_4_1B_2CF3_ntn_edge	ceq	methane	methanol	0.99789	0.00210991	298	8.00E+06	FALSE	191.5262488	6.431928623	219.0844	7.3574	96.7508649	3.249135098	0.639643	1691.715496	8.32393
OPT_ceq_sym_3_on_1_sym_7_mc_4_1B_2CF3_ntn_edge	ceq	methane	methanol	0.99789	0.00210991	298	8.00E+06	TRUE	50.89243634	213.610247	58.2152	244.346	19.24080153	80.75919847	0.639643	1691.715496	8.32393
OPT_ceq_sym_3_on_1_sym_7_mc_4_1B_2CF3_ntn_edge	ceq	methane	methanol	0.998311	0.00168864	298	1.00E+07	FALSE	202.9581465	0.522079508	232.1612	0.5972	99.74342494	0.256575058	0.639643	1691.715496	8.32393
OPT_ceq_sym_3_on_1_sym_7_mc_4_1B_2CF3_ntn_edge	ceq	methane	methanol	0.998311	0.00168864	298	1.00E+07	TRUE	56.81155211	209.5273265	64.986	239.6756	21.33055167	78.66944833	0.639643	1691.715496	8.32393
OPT_ceq_sym_3_on_1_sym_7_mc_4_1B_2CH3_ntn_edge	ceq	methane	22-dimethylbutane	0.989153	0.0108468	298	4.00E+06	FALSE	62.47549665	70.31121183	71.6214	80.6042	47.04951073	52.95048927	0.677588	2318.290638	9.57974
OPT_ceq_sym_3_on_1_sym_7_mc_4_1B_2CH3_ntn_edge	ceq	methane	22-dimethylbutane	0.992743	0.00725744	298	6.00E+06	FALSE	89.38496925	60.3988943	102.4702	69.2408	59.67596718	40.32403282	0.677588	2318.290638	9.57974
OPT_ceq_sym_3_on_1_sym_7_mc_4_1B_2CH3_ntn_edge	ceq	methane	22-dimethylbutane	0.994547	0.00545297	298	8.00E+06	FALSE	108.4803598	53.5567312	124.361	61.397	66.94785689	33.05214311	0.677588	2318.290638	9.57974
OPT_ceq_sym_3_on_1_sym_7_mc_4_1B_2CH3_ntn_edge	ceq	methane	22-dimethylbutane	0.995633	0.00436714	298	1.00E+07	FALSE	127.6441388	45.73008796	146.3302	52.4246	73.62347979	26.37652021	0.677588	2318.290638	9.57974
OPT_ceq_sym_3_on_1_sym_7_mc_4_1B_2CH3_ntn_edge	ceq	methane	methanol	0.995789	0.00421093	298	4.00E+06	FALSE	142.4286124	54.95677605	163.279	63.002	72.15762702	27.84237298	0.677588	2318.290638	9.57974
OPT_ceq_sym_3_on_1_sym_7_mc_4_1B_2CH3_ntn_edge	ceq	methane	methanol	0.995789	0.00421093	298	4.00E+06	TRUE	21.92688309	275.3032489	25.1368	315.6054	7.377072755	92.62292725	0.677588	2318.290638	9.57974
OPT_ceq_sym_3_on_1_sym_7_mc_4_1B_2CH3_ntn_edge	ceq	methane	methanol	0.997189	0.00281124	298	6.00E+06	FALSE	187.1754414	10.7533912	214.5764	12.3276	94.56704157	5.432958432	0.677588	2318.290638	9.57974
OPT_ceq_sym_3_on_1_sym_7_mc_4_1B_2CH3_ntn_edge	ceq	methane	methanol	0.997189	0.00281124	298	6.00E+06	TRUE	43.17581299	244.5640212	49.4964	280.3662	15.00515669	84.99484331	0.677588	2318.290638	9.57974
OPT_ceq_sym_3_on_1_sym_7_mc_4_1B_2CH3_ntn_edge	ceq	methane	methanol	0.99789	0.00210991	298	8.00E+06	FALSE	202.9756236	5.433744157	232.6896	6.2292	97.39275436	2.607245642	0.677588	2318.290638	9.57974
OPT_ceq_sym_3_on_1_sym_7_mc_4_1B_2CH3_ntn_edge	ceq	methane	methanol	0.99789	0.00210991	298	8.00E+06	TRUE	65.23598383	217.1036026	74.786	248.8858	23.10550379	76.89449621	0.677588	2318.290638	9.57974
OPT_ceq_sym_3_on_1_sym_7_mc_4_1B_2CH3_ntn_edge	ceq	methane	methanol	0.998311	0.00168864	298	1.00E+07	FALSE	213.8061263	0.607122252	245.1056	0.696	99.7168448	0.283155195	0.677588	2318.290638	9.57974
OPT_ceq_sym_3_on_1_sym_7_mc_4_1B_2CH3_ntn_edge	ceq	methane	methanol	0.998311	0.00168864	298	1.00E+07	TRUE	92.72361826	184.6244812	106.2976	211.652	33.43221693	66.56778307	0.677588	2318.290638	9.57974
OPT_ceq_sym_3_on_1_sym_7_mc_4_1B_2CN_ntn_edge	ceq	methane	22-dimethylbutane	0.989153	0.0108468	298	4.00E+06	FALSE	76.62004387	65.01607177	88.244	74.8796	54.09640297	45.90359703	0.699203	2135.541883	9.91279
OPT_ceq_sym_3_on_1_sym_7_mc_4_1B_2CN_ntn_edge	ceq	methane	22-dimethylbutane	0.992743	0.00725744	298	6.00E+06	FALSE	97.98707179	57.16530444	112.8526	65.8378	63.15537936	36.84462064	0.699203	2135.541883	9.91279
OPT_ceq_sym_3_on_1_sym_7_mc_4_1B_2CN_ntn_edge	ceq	methane	22-dimethylbutane	0.994547	0.00545297	298	8.00E+06	FALSE	125.3125489	46.89934384	144.3236	54.0144	72.76648953	27.23351047	0.699203	2135.541883	9.91279
OPT_ceq_sym_3_on_1_sym_7_mc_4_1B_2CN_ntn_edge	ceq	methane	22-dimethylbutane	0.995633	0.00436714	298	1.00E+07	FALSE	145.7374986	38.99387519	167.8472	44.9096	78.89157949	21.10842051	0.699203	2135.541883	9.91279
OPT_ceq_sym_3_on_1_sym_7_mc_4_1B_2CN_ntn_edge	ceq	methane	methanol	0.995789	0.00421093	298	4.00E+06	FALSE	147.8326458	50.12133807	170.2602	57.7252	74.68030848	25.31969152	0.699203	2135.541883	9.91279
OPT_ceq_sym_3_on_1_sym_7_mc_4_1B_2CN_ntn_edge	ceq	methane	methanol	0.995789	0.00421093	298	4.00E+06	TRUE	15.57945523	293.7721051	17.943	338.34	5.036165071	94.96383493	0.699203	2135.541883	9.91279
OPT_ceq_sym_3_on_1_sym_7_mc_4_1B_2CN_ntn_edge	ceq	methane	methanol	0.997189	0.00281124	298	6.00E+06	FALSE	186.9550256	16.64899616	215.3178	19.1748	91.82285496	8.177145036	0.699203	2135.541883	9.91279
OPT_ceq_sym_3_on_1_sym_7_mc_4_1B_2CN_ntn_edge	ceq	methane	methanol	0.997189	0.00281124	298	6.00E+06	TRUE	20.48347145	296.5938247	23.591	341.5898	6.460087715	93.53991228	0.699203	2135.541883	9.91279
OPT_ceq_sym_3_on_1_sym_7_mc_4_1B_2CN_ntn_edge	ceq	methane	methanol	0.99789	0.00210991	298	8.00E+06	FALSE	208.6348062	2.26654461	240.2866	2.6104	98.92530579	1.074694212	0.699203	2135.541883	9.91279
OPT_ceq_sym_3_on_1_sym_7_mc_4_1B_2CN_ntn_edge	ceq	methane	methanol	0.99789	0.00210991	298	8.00E+06	TRUE	40.21032822	267.4137125	46.3106	307.9828	13.07125676	86.92874324	0.699203	2135.541883	9.91279
OPT_ceq_sym_3_on_1_sym_7_mc_4_1B_2CN_ntn_edge	ceq	methane	methanol	0.998311	0.00168864	298	1.00E+07	FALSE	218.4452698	0.667356032	251.5854	0.7686	99.69542785	0.304572149	0.699203	2135.541883	9.91279
OPT_ceq_sym_3_on_1_sym_7_mc_4_1B_2CN_ntn_edge	ceq	methane	methanol	0.998311	0.00168864	298	1.00E+07	TRUE	73.62310648	221.1110472	84.7924	254.6556	24.97949612	75.02050388	0.699203	2135.541883	9.91279
OPT_ceq_sym_3_on_1_sym_7_mc_4_1B_2F_ntn_edge	ceq	methane	22-dimethylbutane	0.989153	0.0108468	298	4.00E+06	FALSE	68.87396205	81.94446225	79.6768	94.7974	45.66680919	54.33319081	0.744647	2491.011313	11.72051
OPT_ceq_sym_3_on_1_sym_7_mc_4_1B_2F_ntn_edge	ceq	methane	22-dimethylbutane	0.992743	0.00725744	298	6.00E+06	FALSE	89.25569929	73.46418798	103.2554	84.987	54.85236057	45.14763943	0.744647	2491.011313	11.72051
OPT_ceq_sym_3_on_1_sym_7_mc_4_1B_2F_ntn_edge	ceq	methane	22-dimethylbutane	0.994547	0.00545297	298	8.00E+06	FALSE	110.9816046	64.0980594	128.389	74.1518	63.38920356	36.61079644	0.744647	2491.011313	11.72051
OPT_ceq_sym_3_on_1_sym_7_mc_4_1B_2F_ntn_edge	ceq	methane	22-dimethylbutane	0.995633	0.00436714	298	1.00E+07	FALSE	138.136393	52.13332113	159.803	60.3104	72.60030512	27.39969488	0.744647	2491.011313	11.72051
OPT_ceq_sym_3_on_1_sym_7_mc_4_1B_2F_ntn_edge	ceq	methane	methanol	0.995789	0.00421093	298	4.00E+06	FALSE	163.464323	37.33208567	189.1036	43.1876	81.40799135	18.59200865	0.744647	2491.011313	11.72051
OPT_ceq_sym_3_on_1_sym_7_mc_4_1B_2F_ntn_edge	ceq	methane	methanol	0.995789	0.00421093	298	4.00E+06	TRUE	23.01267612	296.6292823	26.6222	343.1554	7.199516682	92.80048332	0.744647	2491.011313	11.72051
OPT_ceq_sym_3_on_1_sym_7_mc_4_1B_2F_ntn_edge	ceq	methane	methanol	0.997189	0.00281124	298	6.00E+06	FALSE	196.6242147	10.9414417	227.4646	12.6576	94.72868398	5.271316022	0.744647	2491.011313	11.72051
OPT_ceq_sym_3_on_1_sym_7_mc_4_1B_2F_ntn_edge	ceq	methane	methanol	0.997189	0.00281124	298	6.00E+06	TRUE	64.13903275	239.9283829	74.1992	277.561	21.09368826	78.90631174	0.744647	2491.011313	11.72051
OPT_ceq_sym_3_on_1_sym_7_mc_4_1B_2F_ntn_edge	ceq	methane	methanol	0.99789	0.00210991	298	8.00E+06	FALSE	216.2006613	4.306524345	250.1116	4.982	98.04699138	1.953008621	0.744647	2491.011313	11.72051
OPT_ceq_sym_3_on_1_sym_7_mc_4_1B_2F_ntn_edge	ceq	methane	methanol	0.99789	0.00210991	298	8.00E+06	TRUE	121.041687	157.8181255	140.027	182.5718	43.40592711	56.59407289	0.744647	2491.011313	11.72051
OPT_ceq_sym_3_on_1_sym_7_mc_4_1B_2F_ntn_edge	ceq	methane	methanol	0.998311	0.00168864	298	1.00E+07	FALSE	227.6092338	0.784198893	263.3096	0.9072	99.6566456	0.343354397	0.744647	2491.011313	11.72051
OPT_ceq_sym_3_on_1_sym_7_mc_4_1B_2F_ntn_edge	ceq	methane	methanol	0.998311	0.00168864	298	1.00E+07	TRUE	157.5792007	112.0754376	182.2954	129.6544	58.43741525	41.56258475	0.744647	2491.011313	11.72051
OPT_ceq_sym_3_on_1_sym_7_mc_4_1B_2NH2_ntn_edge	ceq	methane	22-dimethylbutane	0.989153	0.0108468	298	4.00E+06	FALSE	55.82461918	80.08930686	63.729	91.4294	41.07350939	58.92649061	0.713722	2586.18529	9.57735
OPT_ceq_sym_3_on_1_sym_7_mc_4_1B_2NH2_ntn_edge	ceq	methane	22-dimethylbutane	0.992743	0.00725744	298	6.00E+06	FALSE	74.23222871	72.98537464	84.743	83.3196	50.42347316	49.57652684	0.713722	2586.18529	9.57735
OPT_ceq_sym_3_on_1_sym_7_mc_4_1B_2NH2_ntn_edge	ceq	methane	22-dimethylbutane	0.994547	0.00545297	298	8.00E+06	FALSE	98.95031787	63.16418703	112.961	72.1078	61.03730072	38.96269928	0.713722	2586.18529	9.57735
OPT_ceq_sym_3_on_1_sym_7_mc_4_1B_2NH2_ntn_edge	ceq	methane	22-dimethylbutane	0.995633	0.00436714	298	1.00E+07	FALSE	117.863887	55.31130143	134.5526	63.143	68.060493	31.939507	0.713722	2586.18529	9.57735
OPT_ceq_sym_3_on_1_sym_7_mc_4_1B_2NH2_ntn_edge	ceq	methane	methanol	0.995789	0.00421093	298	4.00E+06	FALSE	144.0493992	66.71746709	164.4458	76.1642	68.34537218	31.65462782	0.713722	2586.18529	9.57735
OPT_ceq_sym_3_on_1_sym_7_mc_4_1B_2NH2_ntn_edge	ceq	methane	methanol	0.995789	0.00421093	298	4.00E+06	TRUE	18.1889677	293.3593417	20.7644	334.897	5.838249526	94.16175047	0.713722	2586.18529	9.57735
OPT_ceq_sym_3_on_1_sym_7_mc_4_1B_2NH2_ntn_edge	ceq	methane	methanol	0.997189	0.00281124	298	6.00E+06	FALSE	197.4347955	10.02458758	225.3902	11.444	95.16792761	4.832072395	0.713722	2586.18529	9.57735
OPT_ceq_sym_3_on_1_sym_7_mc_4_1B_2NH2_ntn_edge	ceq	methane	methanol	0.997189	0.00281124	298	6.00E+06	TRUE	38.56908389	265.9422174	44.0302	303.5978	12.66589573	87.33410427	0.713722	2586.18529	9.57735
OPT_ceq_sym_3_on_1_sym_7_mc_4_1B_2NH2_ntn_edge	ceq	methane	methanol	0.99789	0.00210991	298	8.00E+06	FALSE	213.9278875	3.372655287	244.2186	3.8502	98.44793057	1.552069426	0.713722	2586.18529	9.57735
OPT_ceq_sym_3_on_1_sym_7_mc_4_1B_2NH2_ntn_edge	ceq	methane	methanol	0.99789	0.00210991	298	8.00E+06	TRUE	64.55242247	232.4232691	73.6926	265.3328	21.73660145	78.26339855	0.713722	2586.18529	9.57735
OPT_ceq_sym_3_on_1_sym_7_mc_4_1B_2NH2_ntn_edge	ceq	methane	methanol	0.998311	0.00168864	298	1.00E+07	FALSE	225.8503492	0.546254178	257.8292	0.6236	99.75871803	0.241281967	0.713722	2586.18529	9.57735
OPT_ceq_sym_3_on_1_sym_7_mc_4_1B_2NH2_ntn_edge	ceq	methane	methanol	0.998311	0.00168864	298	1.00E+07	TRUE	88.58340166	201.8766584	101.1262	230.461	30.49761873	69.50238127	0.713722	2586.18529	9.57735
OPT_ceq_sym_3_on_1_sym_7_mc_4_1B_2NO2_ntn_edge	ceq	methane	22-dimethylbutane	0.989153	0.0108468	298	4.00E+06	FALSE	49.75961499	76.38448449	57.126	87.6924	39.4466449	60.5533551	0.678958	1943.515666	9.33092
OPT_ceq_sym_3_on_1_sym_7_mc_4_1B_2NO2_ntn_edge	ceq	methane	22-dimethylbutane	0.992743	0.00725744	298	6.00E+06	FALSE	73.65060627	68.10358424	84.5538	78.1856	51.95656368	48.04343632	0.678958	1943.515666	9.33092
OPT_ceq_sym_3_on_1_sym_7_mc_4_1B_2NO2_ntn_edge	ceq	methane	22-dimethylbutane	0.994547	0.00545297	298	8.00E+06	FALSE	97.98322001	58.75704115	112.4886	67.4554	62.51311519	37.48688481	0.678958	1943.515666	9.33092
OPT_ceq_sym_3_on_1_sym_7_mc_4_1B_2NO2_ntn_edge	ceq	methane	22-dimethylbutane	0.995633	0.00436714	298	1.00E+07	FALSE	118.4088251	52.33287155	135.938	60.0802	69.34968284	30.65031716	0.678958	1943.515666	9.33092
OPT_ceq_sym_3_on_1_sym_7_mc_4_1B_2NO2_ntn_edge	ceq	methane	methanol	0.995789	0.00421093	298	4.00E+06	FALSE	140.8218184	66.13326864	161.669	75.9236	68.04462765	31.95537235	0.678958	1943.515666	9.33092
OPT_ceq_sym_3_on_1_sym_7_mc_4_1B_2NO2_ntn_edge	ceq	methane	methanol	0.995789	0.00421093	298	4.00E+06	TRUE	12.0713624	293.8153441	13.8584	337.3116	3.94635077	96.05364923	0.678958	1943.515666	9.33092
OPT_ceq_sym_3_on_1_sym_7_mc_4_1B_2NO2_ntn_edge	ceq	methane	methanol	0.997189	0.00281124	298	6.00E+06	FALSE	190.5931054	13.091188	218.8084	15.0292	93.57280437	6.427195626	0.678958	1943.515666	9.33092
OPT_ceq_sym_3_on_1_sym_7_mc_4_1B_2NO2_ntn_edge	ceq	methane	methanol	0.997189	0.00281124	298	6.00E+06	TRUE	24.28348651	277.1406555	27.8784	318.1684	8.056251351	91.94374865	0.678958	1943.515666	9.33092
OPT_ceq_sym_3_on_1_sym_7_mc_4_1B_2NO2_ntn_edge	ceq	methane	methanol	0.99789	0.00210991	298	8.00E+06	FALSE	211.253023	1.542281523	242.5268	1.7706	99.27522765	0.724772347	0.678958	1943.515666	9.33092
OPT_ceq_sym_3_on_1_sym_7_mc_4_1B_2NO2_ntn_edge	ceq	methane	methanol	0.99789	0.00210991	298	8.00E+06	TRUE	39.94793107	258.6864113	45.8618	296.9822	13.37687111	86.62312889	0.678958	1943.515666	9.33092
OPT_ceq_sym_3_on_1_sym_7_mc_4_1B_2NO2_ntn_edge	ceq	methane	methanol	0.998311	0.00168864	298	1.00E+07	FALSE	220.6814448	0.620361968	253.351	0.7122	99.71967605	0.280323951	0.678958	1943.515666	9.33092
OPT_ceq_sym_3_on_1_sym_7_mc_4_1B_2NO2_ntn_edge	ceq	methane	methanol	0.998311	0.00168864	298	1.00E+07	TRUE	58.6711556	239.6724302	67.3568	275.1534	19.66563332	80.33436668	0.678958	1943.515666	9.33092
OPT_ceq_sym_3_on_1_sym_7_mc_4_1B_2OH_ntn_edge	ceq	methane	22-dimethylbutane	0.989153	0.0108468	298	4.00E+06	FALSE	64.49864559	79.67791446	74.494	92.0256	44.73587494	55.26412506	0.723389	2569.554119	10.38796
OPT_ceq_sym_3_on_1_sym_7_mc_4_1B_2OH_ntn_edge	ceq	methane	22-dimethylbutane	0.992743	0.00725744	298	6.00E+06	FALSE	91.51406616	67.89423166	105.696	78.4158	57.4085963	42.5914037	0.723389	2569.554119	10.38796
OPT_ceq_sym_3_on_1_sym_7_mc_4_1B_2OH_ntn_edge	ceq	methane	22-dimethylbutane	0.994547	0.00545297	298	8.00E+06	FALSE	109.9779225	60.82599605	127.0212	70.2522	64.38840715	35.61159285	0.723389	2569.554119	10.38796
OPT_ceq_sym_3_on_1_sym_7_mc_4_1B_2OH_ntn_edge	ceq	methane	22-dimethylbutane	0.995633	0.00436714	298	1.00E+07	FALSE	133.989975	50.13983094	154.7544	57.91	72.76930224	27.23069776	0.723389	2569.554119	10.38796
OPT_ceq_sym_3_on_1_sym_7_mc_4_1B_2OH_ntn_edge	ceq	methane	methanol	0.995789	0.00421093	298	4.00E+06	FALSE	162.708297	33.46684361	187.9232	38.6532	82.94032388	17.05967612	0.723389	2569.554119	10.38796
OPT_ceq_sym_3_on_1_sym_7_mc_4_1B_2OH_ntn_edge	ceq	methane	methanol	0.995789	0.00421093	298	4.00E+06	TRUE	12.16966686	315.1181446	14.0556	363.952	3.718337938	96.28166206	0.723389	2569.554119	10.38796
OPT_ceq_sym_3_on_1_sym_7_mc_4_1B_2OH_ntn_edge	ceq	methane	methanol	0.997189	0.00281124	298	6.00E+06	FALSE	197.5602848	8.801267648	228.1762	10.1652	95.73502547	4.264974528	0.723389	2569.554119	10.38796
OPT_ceq_sym_3_on_1_sym_7_mc_4_1B_2OH_ntn_edge	ceq	methane	methanol	0.997189	0.00281124	298	6.00E+06	TRUE	21.98377468	300.187367	25.3906	346.7074	6.823632484	93.17636752	0.723389	2569.554119	10.38796
OPT_ceq_sym_3_on_1_sym_7_mc_4_1B_2OH_ntn_edge	ceq	methane	methanol	0.99789	0.00210991	298	8.00E+06	FALSE	214.6197757	2.111570017	247.8794	2.4388	99.02572006	0.974279936	0.723389	2569.554119	10.38796
OPT_ceq_sym_3_on_1_sym_7_mc_4_1B_2OH_ntn_edge	ceq	methane	methanol	0.99789	0.00210991	298	8.00E+06	TRUE	47.00901366	265.2893174	54.294	306.4012	15.05259843	84.94740157	0.723389	2569.554119	10.38796
OPT_ceq_sym_3_on_1_sym_7_mc_4_1B_2OH_ntn_edge	ceq	methane	methanol	0.998311	0.00168864	298	1.00E+07	FALSE	225.8536607	0.681056657	260.8542	0.7866	99.69935882	0.300641184	0.723389	2569.554119	10.38796
OPT_ceq_sym_3_on_1_sym_7_mc_4_1B_2OH_ntn_edge	ceq	methane	methanol	0.998311	0.00168864	298	1.00E+07	TRUE	70.09775212	234.7094752	80.9608	271.0824	22.99740486	77.00259514	0.723389	2569.554119	10.38796
OPT_ceq_sym_3_on_1_sym_7_mc_4_1B_2SH_ntn_edge	ceq	methane	22-dimethylbutane	0.989153	0.0108468	298	4.00E+06	FALSE	64.07353805	71.04464151	73.4036	81.3898	47.42036805	52.57963195	0.70063	2146.437234	9.4339
OPT_ceq_sym_3_on_1_sym_7_mc_4_1B_2SH_ntn_edge	ceq	methane	22-dimethylbutane	0.992743	0.00725744	298	6.00E+06	FALSE	86.95435076	63.95028546	99.6162	73.2624	57.62205386	42.37794614	0.70063	2146.437234	9.4339
OPT_ceq_sym_3_on_1_sym_7_mc_4_1B_2SH_ntn_edge	ceq	methane	22-dimethylbutane	0.994547	0.00545297	298	8.00E+06	FALSE	106.1560912	56.86797535	121.614	65.1488	65.11682198	34.88317802	0.70063	2146.437234	9.4339
OPT_ceq_sym_3_on_1_sym_7_mc_4_1B_2SH_ntn_edge	ceq	methane	22-dimethylbutane	0.995633	0.00436714	298	1.00E+07	FALSE	122.0074912	51.11612978	139.7736	58.5594	70.47420248	29.52579752	0.70063	2146.437234	9.4339
OPT_ceq_sym_3_on_1_sym_7_mc_4_1B_2SH_ntn_edge	ceq	methane	methanol	0.995789	0.00421093	298	4.00E+06	FALSE	155.2254599	51.28128127	177.8286	58.7486	75.16726041	24.83273959	0.70063	2146.437234	9.4339
OPT_ceq_sym_3_on_1_sym_7_mc_4_1B_2SH_ntn_edge	ceq	methane	methanol	0.995789	0.00421093	298	4.00E+06	TRUE	19.39517369	282.8643373	22.2194	324.0536	6.416728997	93.583271	0.70063	2146.437234	9.4339
OPT_ceq_sym_3_on_1_sym_7_mc_4_1B_2SH_ntn_edge	ceq	methane	methanol	0.997189	0.00281124	298	6.00E+06	FALSE	199.7325625	9.091885924	228.8166	10.4158	95.6461583	4.353841704	0.70063	2146.437234	9.4339
OPT_ceq_sym_3_on_1_sym_7_mc_4_1B_2SH_ntn_edge	ceq	methane	methanol	0.997189	0.00281124	298	6.00E+06	TRUE	40.7103643	254.3444569	46.6384	291.3808	13.79755943	86.20244057	0.70063	2146.437234	9.4339
OPT_ceq_sym_3_on_1_sym_7_mc_4_1B_2SH_ntn_edge	ceq	methane	methanol	0.99789	0.00210991	298	8.00E+06	FALSE	215.4051939	1.494393969	246.7714	1.712	99.31102037	0.688979626	0.70063	2146.437234	9.4339
OPT_ceq_sym_3_on_1_sym_7_mc_4_1B_2SH_ntn_edge	ceq	methane	methanol	0.99789	0.00210991	298	8.00E+06	TRUE	62.18127915	231.3405662	71.2358	265.0272	21.184549	78.815451	0.70063	2146.437234	9.4339
OPT_ceq_sym_3_on_1_sym_7_mc_4_1B_2SH_ntn_edge	ceq	methane	methanol	0.998311	0.00168864	298	1.00E+07	FALSE	225.5445522	0.726247536	258.3872	0.832	99.67903612	0.320963879	0.70063	2146.437234	9.4339
OPT_ceq_sym_3_on_1_sym_7_mc_4_1B_2SH_ntn_edge	ceq	methane	methanol	0.998311	0.00168864	298	1.00E+07	TRUE	99.57394917	180.0299557	114.0734	206.245	35.61250306	64.38749694	0.70063	2146.437234	9.4339
OPT_ceq_sym_3_on_1_sym_7_mc_4_1B_4Br_1B_4Br	ceq	methane	22-dimethylbutane	0.989153	0.0108468	298	4.00E+06	FALSE	35.87912156	93.20778117	48.1366	125.0506	27.79454833	72.20545167	0.751703	1442.064386	12.36622
OPT_ceq_sym_3_on_1_sym_7_mc_4_1B_4Br_1B_4Br	ceq	methane	22-dimethylbutane	0.992743	0.00725744	298	6.00E+06	FALSE	55.04398052	85.00076547	73.8488	114.0398	39.30456664	60.69543336	0.751703	1442.064386	12.36622
OPT_ceq_sym_3_on_1_sym_7_mc_4_1B_4Br_1B_4Br	ceq	methane	22-dimethylbutane	0.994547	0.00545297	298	8.00E+06	FALSE	82.83057376	71.57637516	111.1282	96.0292	53.64433035	46.35566965	0.751703	1442.064386	12.36622
OPT_ceq_sym_3_on_1_sym_7_mc_4_1B_4Br_1B_4Br	ceq	methane	22-dimethylbutane	0.995633	0.00436714	298	1.00E+07	FALSE	112.0335011	57.93583029	150.3078	77.7286	65.91395058	34.08604942	0.751703	1442.064386	12.36622
OPT_ceq_sym_3_on_1_sym_7_mc_4_1B_4Br_1B_4Br	ceq	methane	methanol	0.995789	0.00421093	298	4.00E+06	FALSE	148.1055219	22.21263815	198.7032	29.8012	86.95815048	13.04184952	0.751703	1442.064386	12.36622
OPT_ceq_sym_3_on_1_sym_7_mc_4_1B_4Br_1B_4Br	ceq	methane	methanol	0.995789	0.00421093	298	4.00E+06	TRUE	98.77741317	130.5091997	132.523	175.0954	43.08032289	56.91967711	0.751703	1442.064386	12.36622
OPT_ceq_sym_3_on_1_sym_7_mc_4_1B_4Br_1B_4Br	ceq	methane	methanol	0.997189	0.00281124	298	6.00E+06	FALSE	181.0345065	4.336507549	242.8818	5.818	97.66063342	2.339366578	0.751703	1442.064386	12.36622
OPT_ceq_sym_3_on_1_sym_7_mc_4_1B_4Br_1B_4Br	ceq	methane	methanol	0.997189	0.00281124	298	6.00E+06	TRUE	142.4023213	71.2512489	191.0516	95.593	66.65103756	33.34896244	0.751703	1442.064386	12.36622
OPT_ceq_sym_3_on_1_sym_7_mc_4_1B_4Br_1B_4Br	ceq	methane	methanol	0.99789	0.00210991	298	8.00E+06	FALSE	199.3787236	1.150240366	267.493	1.5432	99.42639689	0.573603106	0.751703	1442.064386	12.36622
OPT_ceq_sym_3_on_1_sym_7_mc_4_1B_4Br_1B_4Br	ceq	methane	methanol	0.99789	0.00210991	298	8.00E+06	TRUE	165.56917	55.70958747	222.133	74.7418	74.82379778	25.17620222	0.751703	1442.064386	12.36622
OPT_ceq_sym_3_on_1_sym_7_mc_4_1B_4Br_1B_4Br	ceq	methane	methanol	0.998311	0.00168864	298	1.00E+07	FALSE	211.4236006	0.645035	283.6528	0.8654	99.69583668	0.304163319	0.751703	1442.064386	12.36622
OPT_ceq_sym_3_on_1_sym_7_mc_4_1B_4Br_1B_4Br	ceq	methane	methanol	0.998311	0.00168864	298	1.00E+07	TRUE	184.3653737	41.99540098	247.3506	56.3424	81.44758029	18.55241971	0.751703	1442.064386	12.36622
OPT_ceq_sym_3_on_1_sym_7_mc_4_1B_4Br_ntn_edge	ceq	methane	22-dimethylbutane	0.989153	0.0108468	298	4.00E+06	FALSE	62.44776092	68.83169241	71.2366	78.519	47.56857173	52.43142827	0.684479	1266.593263	8.63505
OPT_ceq_sym_3_on_1_sym_7_mc_4_1B_4Br_ntn_edge	ceq	methane	22-dimethylbutane	0.992743	0.00725744	298	6.00E+06	FALSE	80.29636516	63.09751512	91.5972	71.9778	55.99706557	44.00293443	0.684479	1266.593263	8.63505
OPT_ceq_sym_3_on_1_sym_7_mc_4_1B_4Br_ntn_edge	ceq	methane	22-dimethylbutane	0.994547	0.00545297	298	8.00E+06	FALSE	99.28247757	55.5278611	113.2554	63.3428	64.13168424	35.86831576	0.684479	1266.593263	8.63505
OPT_ceq_sym_3_on_1_sym_7_mc_4_1B_4Br_ntn_edge	ceq	methane	22-dimethylbutane	0.995633	0.00436714	298	1.00E+07	FALSE	135.7562002	41.4913469	154.8624	47.3308	76.59129981	23.40870019	0.684479	1266.593263	8.63505
OPT_ceq_sym_3_on_1_sym_7_mc_4_1B_4Br_ntn_edge	ceq	methane	methanol	0.995789	0.00421093	298	4.00E+06	FALSE	145.1441491	77.31023088	165.5716	88.1908	65.24670322	34.75329678	0.684479	1266.593263	8.63505
OPT_ceq_sym_3_on_1_sym_7_mc_4_1B_4Br_ntn_edge	ceq	methane	methanol	0.995789	0.00421093	298	4.00E+06	TRUE	24.57319208	257.9308544	28.0316	294.2318	8.69835048	91.30164952	0.684479	1266.593263	8.63505
OPT_ceq_sym_3_on_1_sym_7_mc_4_1B_4Br_ntn_edge	ceq	methane	methanol	0.997189	0.00281124	298	6.00E+06	FALSE	194.0727797	25.55203119	221.3864	29.1482	88.365599	11.634401	0.684479	1266.593263	8.63505
OPT_ceq_sym_3_on_1_sym_7_mc_4_1B_4Br_ntn_edge	ceq	methane	methanol	0.997189	0.00281124	298	6.00E+06	TRUE	50.55196415	225.2967478	57.6666	257.0048	18.32597433	81.67402567	0.684479	1266.593263	8.63505
OPT_ceq_sym_3_on_1_sym_7_mc_4_1B_4Br_ntn_edge	ceq	methane	methanol	0.99789	0.00210991	298	8.00E+06	FALSE	218.836024	3.925525269	249.6348	4.478	98.23779046	1.762209538	0.684479	1266.593263	8.63505
OPT_ceq_sym_3_on_1_sym_7_mc_4_1B_4Br_ntn_edge	ceq	methane	methanol	0.99789	0.00210991	298	8.00E+06	TRUE	85.99425018	181.1082021	98.097	206.5972	32.1952305	67.8047695	0.684479	1266.593263	8.63505
OPT_ceq_sym_3_on_1_sym_7_mc_4_1B_4Br_ntn_edge	ceq	methane	methanol	0.998311	0.00168864	298	1.00E+07	FALSE	228.9317597	0.906079258	261.1514	1.0336	99.60577455	0.394225451	0.684479	1266.593263	8.63505
OPT_ceq_sym_3_on_1_sym_7_mc_4_1B_4Br_ntn_edge	ceq	methane	methanol	0.998311	0.00168864	298	1.00E+07	TRUE	122.2460114	140.3765382	139.4508	160.133	46.54817784	53.45182216	0.684479	1266.593263	8.63505
OPT_ceq_sym_3_on_1_sym_7_mc_4_1B_4CN_1B_4CN	ceq	methane	22-dimethylbutane	0.989153	0.0108468	298	4.00E+06	FALSE	39.07208123	86.8869386	54.5888	121.3924	31.0196771	68.9803229	0.710171	2771.069614	12.1308
OPT_ceq_sym_3_on_1_sym_7_mc_4_1B_4CN_1B_4CN	ceq	methane	22-dimethylbutane	0.992743	0.00725744	298	6.00E+06	FALSE	61.56775928	75.49587746	86.0182	105.4776	44.91910528	55.08089472	0.710171	2771.069614	12.1308
OPT_ceq_sym_3_on_1_sym_7_mc_4_1B_4CN_1B_4CN	ceq	methane	22-dimethylbutane	0.994547	0.00545297	298	8.00E+06	FALSE	99.24512479	56.80270723	138.6584	79.3608	63.59916925	36.40083075	0.710171	2771.069614	12.1308
OPT_ceq_sym_3_on_1_sym_7_mc_4_1B_4CN_1B_4CN	ceq	methane	22-dimethylbutane	0.995633	0.00436714	298	1.00E+07	FALSE	134.1908917	38.51737289	187.4822	53.8138	77.69801406	22.30198594	0.710171	2771.069614	12.1308
OPT_ceq_sym_3_on_1_sym_7_mc_4_1B_4CN_1B_4CN	ceq	methane	methanol	0.995789	0.00421093	298	4.00E+06	FALSE	134.1503801	5.306733701	187.4256	7.4142	96.19471997	3.80528003	0.710171	2771.069614	12.1308
OPT_ceq_sym_3_on_1_sym_7_mc_4_1B_4CN_1B_4CN	ceq	methane	methanol	0.995789	0.00421093	298	4.00E+06	TRUE	33.19546523	265.7969141	46.3784	371.353	11.10244526	88.89755474	0.710171	2771.069614	12.1308
OPT_ceq_sym_3_on_1_sym_7_mc_4_1B_4CN_1B_4CN	ceq	methane	methanol	0.997189	0.00281124	298	6.00E+06	FALSE	162.2783162	1.488193023	226.724	2.0792	99.09127145	0.908728549	0.710171	2771.069614	12.1308
OPT_ceq_sym_3_on_1_sym_7_mc_4_1B_4CN_1B_4CN	ceq	methane	methanol	0.997189	0.00281124	298	6.00E+06	TRUE	66.00456715	206.7050865	92.217	288.794	24.20323823	75.79676177	0.710171	2771.069614	12.1308
OPT_ceq_sym_3_on_1_sym_7_mc_4_1B_4CN_1B_4CN	ceq	methane	methanol	0.99789	0.00210991	298	8.00E+06	FALSE	181.5244769	0.634156896	253.6134	0.886	99.65186558	0.348134416	0.710171	2771.069614	12.1308
OPT_ceq_sym_3_on_1_sym_7_mc_4_1B_4CN_1B_4CN	ceq	methane	methanol	0.99789	0.00210991	298	8.00E+06	TRUE	83.84069509	185.3745107	117.1364	258.9924	31.14262987	68.85737013	0.710171	2771.069614	12.1308
OPT_ceq_sym_3_on_1_sym_7_mc_4_1B_4CN_1B_4CN	ceq	methane	methanol	0.998311	0.00168864	298	1.00E+07	FALSE	194.8512197	0.63258224	272.2326	0.8838	99.67640171	0.32359829	0.710171	2771.069614	12.1308
OPT_ceq_sym_3_on_1_sym_7_mc_4_1B_4CN_1B_4CN	ceq	methane	methanol	0.998311	0.00168864	298	1.00E+07	TRUE	113.6746993	142.6828681	158.8184	199.3466	44.3422445	55.6577555	0.710171	2771.069614	12.1308
OPT_ceq_sym_3_on_1_sym_7_mc_4_1B_4CN_ntn_edge	ceq	methane	22-dimethylbutane	0.989153	0.0108468	298	4.00E+06	FALSE	102.996099	48.05931835	118.2526	55.1782	68.18431328	31.81568672	0.637517	1773.553401	8.4981
OPT_ceq_sym_3_on_1_sym_7_mc_4_1B_4CN_ntn_edge	ceq	methane	22-dimethylbutane	0.992743	0.00725744	298	6.00E+06	FALSE	120.837157	42.8520546	138.7364	49.1996	73.82108803	26.17891197	0.637517	1773.553401	8.4981
OPT_ceq_sym_3_on_1_sym_7_mc_4_1B_4CN_ntn_edge	ceq	methane	22-dimethylbutane	0.994547	0.00545297	298	8.00E+06	FALSE	140.4266278	36.14530514	161.2276	41.4994	79.52941641	20.47058359	0.637517	1773.553401	8.4981
OPT_ceq_sym_3_on_1_sym_7_mc_4_1B_4CN_ntn_edge	ceq	methane	22-dimethylbutane	0.995633	0.00436714	298	1.00E+07	FALSE	157.7907351	29.79548484	181.1638	34.209	84.11637867	15.88362133	0.637517	1773.553401	8.4981
OPT_ceq_sym_3_on_1_sym_7_mc_4_1B_4CN_ntn_edge	ceq	methane	methanol	0.995789	0.00421093	298	4.00E+06	FALSE	144.8249218	62.54447574	166.2774	71.809	69.83910043	30.16089957	0.637517	1773.553401	8.4981
OPT_ceq_sym_3_on_1_sym_7_mc_4_1B_4CN_ntn_edge	ceq	methane	methanol	0.995789	0.00421093	298	4.00E+06	TRUE	18.69566728	263.9629636	21.465	303.063	6.614221269	93.38577873	0.637517	1773.553401	8.4981
OPT_ceq_sym_3_on_1_sym_7_mc_4_1B_4CN_ntn_edge	ceq	methane	methanol	0.997189	0.00281124	298	6.00E+06	FALSE	194.2252068	12.65870436	222.9952	14.5338	93.88125239	6.118747606	0.637517	1773.553401	8.4981
OPT_ceq_sym_3_on_1_sym_7_mc_4_1B_4CN_ntn_edge	ceq	methane	methanol	0.997189	0.00281124	298	6.00E+06	TRUE	32.60876251	243.3544417	37.439	279.4018	11.81634436	88.18365564	0.637517	1773.553401	8.4981
OPT_ceq_sym_3_on_1_sym_7_mc_4_1B_4CN_ntn_edge	ceq	methane	methanol	0.99789	0.00210991	298	8.00E+06	FALSE	208.8718446	6.046195348	239.8114	6.9418	97.18674368	2.813256323	0.637517	1773.553401	8.4981
OPT_ceq_sym_3_on_1_sym_7_mc_4_1B_4CN_ntn_edge	ceq	methane	methanol	0.99789	0.00210991	298	8.00E+06	TRUE	47.8309464	227.1105938	54.916	260.7518	17.39676964	82.60323036	0.637517	1773.553401	8.4981
OPT_ceq_sym_3_on_1_sym_7_mc_4_1B_4CN_ntn_edge	ceq	methane	methanol	0.998311	0.00168864	298	1.00E+07	FALSE	220.840033	0.67640602	253.5524	0.7766	99.69464748	0.305352516	0.637517	1773.553401	8.4981
OPT_ceq_sym_3_on_1_sym_7_mc_4_1B_4CN_ntn_edge	ceq	methane	methanol	0.998311	0.00168864	298	1.00E+07	TRUE	71.77812341	194.0374227	82.4104	222.7796	27.00298175	72.99701825	0.637517	1773.553401	8.4981
OPT_ceq_sym_3_on_1_sym_7_mc_4_1B_4F_ntn_edge	ceq	methane	22-dimethylbutane	0.989153	0.0108468	298	4.00E+06	FALSE	62.13235319	80.86031425	71.7244	93.3436	43.45142608	56.54857392	0.732111	2312.796295	9.90573
OPT_ceq_sym_3_on_1_sym_7_mc_4_1B_4F_ntn_edge	ceq	methane	22-dimethylbutane	0.992743	0.00725744	298	6.00E+06	FALSE	81.94886313	73.03741955	94.6002	84.313	52.87491365	47.12508635	0.732111	2312.796295	9.90573
OPT_ceq_sym_3_on_1_sym_7_mc_4_1B_4F_ntn_edge	ceq	methane	22-dimethylbutane	0.994547	0.00545297	298	8.00E+06	FALSE	115.4502845	59.45160884	133.2736	68.6298	66.00859619	33.99140381	0.732111	2312.796295	9.90573
OPT_ceq_sym_3_on_1_sym_7_mc_4_1B_4F_ntn_edge	ceq	methane	22-dimethylbutane	0.995633	0.00436714	298	1.00E+07	FALSE	135.0722313	51.37333915	155.9248	59.3044	72.44593206	27.55406794	0.732111	2312.796295	9.90573
OPT_ceq_sym_3_on_1_sym_7_mc_4_1B_4F_ntn_edge	ceq	methane	methanol	0.995789	0.00421093	298	4.00E+06	FALSE	151.0219065	56.47945287	174.3368	65.1988	72.78116489	27.21883511	0.732111	2312.796295	9.90573
OPT_ceq_sym_3_on_1_sym_7_mc_4_1B_4F_ntn_edge	ceq	methane	methanol	0.995789	0.00421093	298	4.00E+06	TRUE	23.42744988	294.9362802	27.0442	340.4688	7.358705678	92.64129432	0.732111	2312.796295	9.90573
OPT_ceq_sym_3_on_1_sym_7_mc_4_1B_4F_ntn_edge	ceq	methane	methanol	0.997189	0.00281124	298	6.00E+06	FALSE	200.6107393	7.692954919	231.5812	8.8806	96.30685622	3.693143776	0.732111	2312.796295	9.90573
OPT_ceq_sym_3_on_1_sym_7_mc_4_1B_4F_ntn_edge	ceq	methane	methanol	0.997189	0.00281124	298	6.00E+06	TRUE	36.36078962	286.3283759	41.9742	330.532	11.26805406	88.73194594	0.732111	2312.796295	9.90573
OPT_ceq_sym_3_on_1_sym_7_mc_4_1B_4F_ntn_edge	ceq	methane	methanol	0.99789	0.00210991	298	8.00E+06	FALSE	218.0845216	1.122506473	251.7526	1.2958	99.48792405	0.512075951	0.732111	2312.796295	9.90573
OPT_ceq_sym_3_on_1_sym_7_mc_4_1B_4F_ntn_edge	ceq	methane	methanol	0.99789	0.00210991	298	8.00E+06	TRUE	83.12715708	217.6550273	95.9604	251.2568	27.63699494	72.36300506	0.732111	2312.796295	9.90573
OPT_ceq_sym_3_on_1_sym_7_mc_4_1B_4F_ntn_edge	ceq	methane	methanol	0.998311	0.00168864	298	1.00E+07	FALSE	228.1491374	0.5549295	263.371	0.6406	99.75735915	0.242640854	0.732111	2312.796295	9.90573
OPT_ceq_sym_3_on_1_sym_7_mc_4_1B_4F_ntn_edge	ceq	methane	methanol	0.998311	0.00168864	298	1.00E+07	TRUE	111.834147	184.3589108	129.0992	212.8204	37.75718034	62.24281966	0.732111	2312.796295	9.90573
OPT_ceq_sym_3_on_1_sym_7_mc_4_1B_4H_ntn_edge	ceq	methane	22-dimethylbutane	0.989153	0.0108468	298	4.00E+06	FALSE	55.82115114	91.35934047	64.3798	105.3668	37.92700413	62.07299587	0.756743	2819.495662	11.49092
OPT_ceq_sym_3_on_1_sym_7_mc_4_1B_4H_ntn_edge	ceq	methane	22-dimethylbutane	0.992743	0.00725744	298	6.00E+06	FALSE	70.82371737	86.15299183	81.6826	99.3622	45.11734112	54.88265888	0.756743	2819.495662	11.49092
OPT_ceq_sym_3_on_1_sym_7_mc_4_1B_4H_ntn_edge	ceq	methane	22-dimethylbutane	0.994547	0.00545297	298	8.00E+06	FALSE	98.12258209	73.45403067	113.167	84.7162	57.18878611	42.81121389	0.756743	2819.495662	11.49092
OPT_ceq_sym_3_on_1_sym_7_mc_4_1B_4H_ntn_edge	ceq	methane	22-dimethylbutane	0.995633	0.00436714	298	1.00E+07	FALSE	123.6694653	60.67425952	142.6308	69.977	67.08634396	32.91365604	0.756743	2819.495662	11.49092
OPT_ceq_sym_3_on_1_sym_7_mc_4_1B_4H_ntn_edge	ceq	methane	methanol	0.995789	0.00421093	298	4.00E+06	FALSE	163.1954371	26.48018664	188.217	30.5402	86.03922522	13.96077478	0.756743	2819.495662	11.49092
OPT_ceq_sym_3_on_1_sym_7_mc_4_1B_4H_ntn_edge	ceq	methane	methanol	0.995789	0.00421093	298	4.00E+06	TRUE	33.74892426	286.603744	38.9234	330.5466	10.53492841	89.46507159	0.756743	2819.495662	11.49092
OPT_ceq_sym_3_on_1_sym_7_mc_4_1B_4H_ntn_edge	ceq	methane	methanol	0.997189	0.00281124	298	6.00E+06	FALSE	199.9764703	2.512046311	230.6374	2.8972	98.75941295	1.240587048	0.756743	2819.495662	11.49092
OPT_ceq_sym_3_on_1_sym_7_mc_4_1B_4H_ntn_edge	ceq	methane	methanol	0.997189	0.00281124	298	6.00E+06	TRUE	90.10366414	199.9513256	103.9186	230.6084	31.0643386	68.9356614	0.756743	2819.495662	11.49092
OPT_ceq_sym_3_on_1_sym_7_mc_4_1B_4H_ntn_edge	ceq	methane	methanol	0.99789	0.00210991	298	8.00E+06	FALSE	216.1195673	1.039258149	249.2556	1.1986	99.52142947	0.478570533	0.756743	2819.495662	11.49092
OPT_ceq_sym_3_on_1_sym_7_mc_4_1B_4H_ntn_edge	ceq	methane	methanol	0.99789	0.00210991	298	8.00E+06	TRUE	141.5322892	129.0091678	163.2324	148.7892	52.31445515	47.68554485	0.756743	2819.495662	11.49092
OPT_ceq_sym_3_on_1_sym_7_mc_4_1B_4H_ntn_edge	ceq	methane	methanol	0.998311	0.00168864	298	1.00E+07	FALSE	226.7774692	0.504628936	261.5476	0.582	99.77797242	0.222027577	0.756743	2819.495662	11.49092
OPT_ceq_sym_3_on_1_sym_7_mc_4_1B_4H_ntn_edge	ceq	methane	methanol	0.998311	0.00168864	298	1.00E+07	TRUE	174.8745623	85.1038492	201.6868	98.1522	67.26503223	32.73496777	0.756743	2819.495662	11.49092
OPT_ceq_sym_3_on_1_sym_7_mc_4_2B_2Br_2B_2Br	ceq	methane	22-dimethylbutane	0.989153	0.0108468	298	4.00E+06	FALSE	81.72298312	64.44316454	81.4694	64.2432	55.91101936	44.08898064	0.88103	3239.786179	20.06323
OPT_ceq_sym_3_on_1_sym_7_mc_4_2B_2Br_2B_2Br	ceq	methane	22-dimethylbutane	0.992743	0.00725744	298	6.00E+06	FALSE	127.6681491	27.02766576	127.272	26.9438	82.52850875	17.47149125	0.88103	3239.786179	20.06323
OPT_ceq_sym_3_on_1_sym_7_mc_4_2B_2Br_2B_2Br	ceq	methane	22-dimethylbutane	0.994547	0.00545297	298	8.00E+06	FALSE	159.6728584	13.57311683	159.1774	13.531	92.16540713	7.834592874	0.88103	3239.786179	20.06323
OPT_ceq_sym_3_on_1_sym_7_mc_4_2B_2Br_2B_2Br	ceq	methane	22-dimethylbutane	0.995633	0.00436714	298	1.00E+07	FALSE	182.9091597	8.994108355	182.3416	8.9662	95.3132073	4.686792697	0.88103	3239.786179	20.06323
OPT_ceq_sym_3_on_1_sym_7_mc_4_2B_2Br_2B_2Br	ceq	methane	methanol	0.995789	0.00421093	298	4.00E+06	FALSE	99.59985433	1.2496777	99.2908	1.2458	98.76084928	1.239150717	0.88103	3239.786179	20.06323
OPT_ceq_sym_3_on_1_sym_7_mc_4_2B_2Br_2B_2Br	ceq	methane	methanol	0.995789	0.00421093	298	4.00E+06	TRUE	94.52270012	23.2790339	94.2294	23.2068	80.238802	19.761198	0.88103	3239.786179	20.06323
OPT_ceq_sym_3_on_1_sym_7_mc_4_2B_2Br_2B_2Br	ceq	methane	methanol	0.997189	0.00281124	298	6.00E+06	FALSE	137.486816	0.669878606	137.0602	0.6678	99.51513127	0.484868727	0.88103	3239.786179	20.06323
OPT_ceq_sym_3_on_1_sym_7_mc_4_2B_2Br_2B_2Br	ceq	methane	methanol	0.997189	0.00281124	298	6.00E+06	TRUE	129.3295042	21.14079905	128.9282	21.0752	85.95018513	14.04981487	0.88103	3239.786179	20.06323
OPT_ceq_sym_3_on_1_sym_7_mc_4_2B_2Br_2B_2Br	ceq	methane	methanol	0.99789	0.00210991	298	8.00E+06	FALSE	164.6224167	0.359114317	164.1116	0.358	99.78233059	0.217669405	0.88103	3239.786179	20.06323
OPT_ceq_sym_3_on_1_sym_7_mc_4_2B_2Br_2B_2Br	ceq	methane	methanol	0.99789	0.00210991	298	8.00E+06	TRUE	158.8579297	13.90735396	158.365	13.8642	91.9501455	8.049854496	0.88103	3239.786179	20.06323
OPT_ceq_sym_3_on_1_sym_7_mc_4_2B_2Br_2B_2Br	ceq	methane	methanol	0.998311	0.00168864	298	1.00E+07	FALSE	189.2440165	0.254991228	188.6568	0.2542	99.86543928	0.134560719	0.88103	3239.786179	20.06323
OPT_ceq_sym_3_on_1_sym_7_mc_4_2B_2Br_2B_2Br	ceq	methane	methanol	0.998311	0.00168864	298	1.00E+07	TRUE	183.2905432	10.11017145	182.7218	10.0788	94.77242291	5.227577093	0.88103	3239.786179	20.06323
OPT_ceq_sym_3_on_1_sym_7_mc_4_2B_2CF3_2B_2CF3	ceq	methane	22-dimethylbutane	0.989153	0.0108468	298	4.00E+06	FALSE	81.210312	43.86852019	79.3	42.8366	64.92730271	35.07269729	0.808382	3538.750897	20.02151
OPT_ceq_sym_3_on_1_sym_7_mc_4_2B_2CF3_2B_2CF3	ceq	methane	22-dimethylbutane	0.992743	0.00725744	298	6.00E+06	FALSE	120.3164055	18.39510855	117.4862	17.9624	86.73858571	13.26141429	0.808382	3538.750897	20.02151
OPT_ceq_sym_3_on_1_sym_7_mc_4_2B_2CF3_2B_2CF3	ceq	methane	22-dimethylbutane	0.994547	0.00545297	298	8.00E+06	FALSE	148.5478955	10.7279539	145.0536	10.4756	93.26454454	6.735455464	0.808382	3538.750897	20.02151
OPT_ceq_sym_3_on_1_sym_7_mc_4_2B_2CF3_2B_2CF3	ceq	methane	22-dimethylbutane	0.995633	0.00436714	298	1.00E+07	FALSE	169.6871548	6.449307198	165.6956	6.2976	96.33845989	3.661540107	0.808382	3538.750897	20.02151
OPT_ceq_sym_3_on_1_sym_7_mc_4_2B_2CF3_2B_2CF3	ceq	methane	methanol	0.995789	0.00421093	298	4.00E+06	FALSE	93.59442373	1.046005204	91.3928	1.0214	98.8947586	1.105241402	0.808382	3538.750897	20.02151
OPT_ceq_sym_3_on_1_sym_7_mc_4_2B_2CF3_2B_2CF3	ceq	methane	methanol	0.995789	0.00421093	298	4.00E+06	TRUE	84.4544233	38.91356466	82.4678	37.9982	68.45732406	31.54267594	0.808382	3538.750897	20.02151
OPT_ceq_sym_3_on_1_sym_7_mc_4_2B_2CF3_2B_2CF3	ceq	methane	methanol	0.997189	0.00281124	298	6.00E+06	FALSE	126.00379	0.586598571	123.0398	0.5728	99.53661682	0.463383183	0.808382	3538.750897	20.02151
OPT_ceq_sym_3_on_1_sym_7_mc_4_2B_2CF3_2B_2CF3	ceq	methane	methanol	0.997189	0.00281124	298	6.00E+06	TRUE	118.5064294	24.29878077	115.7188	23.7272	82.9846679	17.0153321	0.808382	3538.750897	20.02151
OPT_ceq_sym_3_on_1_sym_7_mc_4_2B_2CF3_2B_2CF3	ceq	methane	methanol	0.99789	0.00210991	298	8.00E+06	FALSE	153.8244152	0.320949707	150.206	0.3134	99.79178764	0.208212363	0.808382	3538.750897	20.02151
OPT_ceq_sym_3_on_1_sym_7_mc_4_2B_2CF3_2B_2CF3	ceq	methane	methanol	0.99789	0.00210991	298	8.00E+06	TRUE	143.7139874	17.96806315	140.3334	17.5454	88.88679164	11.11320836	0.808382	3538.750897	20.02151
OPT_ceq_sym_3_on_1_sym_7_mc_4_2B_2CF3_2B_2CF3	ceq	methane	methanol	0.998311	0.00168864	298	1.00E+07	FALSE	174.0641141	0.240456258	169.9696	0.2348	99.86204822	0.13795178	0.808382	3538.750897	20.02151
OPT_ceq_sym_3_on_1_sym_7_mc_4_2B_2CF3_2B_2CF3	ceq	methane	methanol	0.998311	0.00168864	298	1.00E+07	TRUE	168.6460652	13.27466013	164.679	12.9624	92.70305233	7.296947671	0.808382	3538.750897	20.02151
OPT_ceq_sym_3_on_1_sym_7_mc_4_2B_2CH3_2B_2CH3	ceq	methane	22-dimethylbutane	0.989153	0.0108468	298	4.00E+06	FALSE	87.19736625	22.79183504	86.1788	22.5256	79.2781157	20.7218843	0.848149	5893.85342	21.47606
OPT_ceq_sym_3_on_1_sym_7_mc_4_2B_2CH3_2B_2CH3	ceq	methane	22-dimethylbutane	0.992743	0.00725744	298	6.00E+06	FALSE	119.1850191	11.90506495	117.7928	11.766	90.91840925	9.081590753	0.848149	5893.85342	21.47606
OPT_ceq_sym_3_on_1_sym_7_mc_4_2B_2CH3_2B_2CH3	ceq	methane	22-dimethylbutane	0.994547	0.00545297	298	8.00E+06	FALSE	148.4373198	7.71633574	146.7034	7.6262	95.05849818	4.941501825	0.848149	5893.85342	21.47606
OPT_ceq_sym_3_on_1_sym_7_mc_4_2B_2CH3_2B_2CH3	ceq	methane	22-dimethylbutane	0.995633	0.00436714	298	1.00E+07	FALSE	170.3776078	5.010326417	168.3874	4.9518	97.143289	2.856711004	0.848149	5893.85342	21.47606
OPT_ceq_sym_3_on_1_sym_7_mc_4_2B_2CH3_2B_2CH3	ceq	methane	methanol	0.995789	0.00421093	298	4.00E+06	FALSE	86.86548954	0.706047452	85.8508	0.6978	99.19374779	0.80625221	0.848149	5893.85342	21.47606
OPT_ceq_sym_3_on_1_sym_7_mc_4_2B_2CH3_2B_2CH3	ceq	methane	methanol	0.995789	0.00421093	298	4.00E+06	TRUE	82.23378588	23.65329792	81.2732	23.377	77.66177227	22.33822773	0.848149	5893.85342	21.47606
OPT_ceq_sym_3_on_1_sym_7_mc_4_2B_2CH3_2B_2CH3	ceq	methane	methanol	0.997189	0.00281124	298	6.00E+06	FALSE	121.16778	0.448843006	119.7524	0.4436	99.63093614	0.369063862	0.848149	5893.85342	21.47606
OPT_ceq_sym_3_on_1_sym_7_mc_4_2B_2CH3_2B_2CH3	ceq	methane	methanol	0.997189	0.00281124	298	6.00E+06	TRUE	115.7824734	22.1517582	114.43	21.893	83.94034756	16.05965244	0.848149	5893.85342	21.47606
OPT_ceq_sym_3_on_1_sym_7_mc_4_2B_2CH3_2B_2CH3	ceq	methane	methanol	0.99789	0.00210991	298	8.00E+06	FALSE	150.0052349	0.26691791	148.253	0.2638	99.822377	0.177623003	0.848149	5893.85342	21.47606
OPT_ceq_sym_3_on_1_sym_7_mc_4_2B_2CH3_2B_2CH3	ceq	methane	methanol	0.99789	0.00210991	298	8.00E+06	TRUE	141.9800919	22.39257117	140.3216	22.131	86.37694934	13.62305066	0.848149	5893.85342	21.47606
OPT_ceq_sym_3_on_1_sym_7_mc_4_2B_2CH3_2B_2CH3	ceq	methane	methanol	0.998311	0.00168864	298	1.00E+07	FALSE	172.8687067	0.202768572	170.8494	0.2004	99.88284114	0.117158863	0.848149	5893.85342	21.47606
OPT_ceq_sym_3_on_1_sym_7_mc_4_2B_2CH3_2B_2CH3	ceq	methane	methanol	0.998311	0.00168864	298	1.00E+07	TRUE	164.982183	15.03927617	163.055	14.8636	91.64584254	8.354157463	0.848149	5893.85342	21.47606
OPT_ceq_sym_3_on_1_sym_7_mc_4_2B_2CN_2B_2CN	ceq	methane	22-dimethylbutane	0.989153	0.0108468	298	4.00E+06	FALSE	87.85325659	30.33195715	88.2554	30.4708	74.33523519	25.66476481	0.865343	5473.905214	20.96856
OPT_ceq_sym_3_on_1_sym_7_mc_4_2B_2CN_2B_2CN	ceq	methane	22-dimethylbutane	0.992743	0.00725744	298	6.00E+06	FALSE	122.444517	17.88334	123.005	17.9652	87.25603	12.74397	0.865343	5473.905214	20.96856
OPT_ceq_sym_3_on_1_sym_7_mc_4_2B_2CN_2B_2CN	ceq	methane	22-dimethylbutane	0.994547	0.00545297	298	8.00E+06	FALSE	150.6619533	10.60007873	151.3516	10.6486	93.42679824	6.573201761	0.865343	5473.905214	20.96856
OPT_ceq_sym_3_on_1_sym_7_mc_4_2B_2CN_2B_2CN	ceq	methane	22-dimethylbutane	0.995633	0.00436714	298	1.00E+07	FALSE	174.8263421	6.536479627	175.6266	6.5664	96.39590983	3.604090168	0.865343	5473.905214	20.96856
OPT_ceq_sym_3_on_1_sym_7_mc_4_2B_2CN_2B_2CN	ceq	methane	methanol	0.995789	0.00421093	298	4.00E+06	FALSE	92.09623459	0.659381717	92.5178	0.6624	99.28911936	0.710880638	0.865343	5473.905214	20.96856
OPT_ceq_sym_3_on_1_sym_7_mc_4_2B_2CN_2B_2CN	ceq	methane	methanol	0.995789	0.00421093	298	4.00E+06	TRUE	73.37373579	115.9779175	73.7096	116.5088	38.74998423	61.25001577	0.865343	5473.905214	20.96856
OPT_ceq_sym_3_on_1_sym_7_mc_4_2B_2CN_2B_2CN	ceq	methane	methanol	0.997189	0.00281124	298	6.00E+06	FALSE	125.6854817	0.432619707	126.2608	0.4346	99.65697255	0.34302745	0.865343	5473.905214	20.96856
OPT_ceq_sym_3_on_1_sym_7_mc_4_2B_2CN_2B_2CN	ceq	methane	methanol	0.997189	0.00281124	298	6.00E+06	TRUE	106.0419986	87.459061	106.5274	87.8594	54.80176638	45.19823362	0.865343	5473.905214	20.96856
OPT_ceq_sym_3_on_1_sym_7_mc_4_2B_2CN_2B_2CN	ceq	methane	methanol	0.99789	0.00210991	298	8.00E+06	FALSE	154.482266	0.328297238	155.1894	0.3298	99.78793615	0.212063848	0.865343	5473.905214	20.96856
OPT_ceq_sym_3_on_1_sym_7_mc_4_2B_2CN_2B_2CN	ceq	methane	methanol	0.99789	0.00210991	298	8.00E+06	TRUE	137.5852113	63.90746711	138.215	64.2	68.28298298	31.71701702	0.865343	5473.905214	20.96856
OPT_ceq_sym_3_on_1_sym_7_mc_4_2B_2CN_2B_2CN	ceq	methane	methanol	0.998311	0.00168864	298	1.00E+07	FALSE	177.890516	0.232336493	178.7048	0.2334	99.86956391	0.130436095	0.865343	5473.905214	20.96856
OPT_ceq_sym_3_on_1_sym_7_mc_4_2B_2CN_2B_2CN	ceq	methane	methanol	0.998311	0.00168864	298	1.00E+07	TRUE	160.8638546	48.48984044	161.6002	48.7118	76.83831641	23.16168359	0.865343	5473.905214	20.96856
OPT_ceq_sym_3_on_1_sym_7_mc_4_2B_2F_2B_2F	ceq	methane	22-dimethylbutane	0.989153	0.0108468	298	4.00E+06	FALSE	88.18108798	17.49480268	89.1196	17.681	83.44484956	16.55515044	0.901094	5371.288936	21.63591
OPT_ceq_sym_3_on_1_sym_7_mc_4_2B_2F_2B_2F	ceq	methane	22-dimethylbutane	0.992743	0.00725744	298	6.00E+06	FALSE	122.8987872	10.44107555	124.2068	10.5522	92.1695768	7.8304232	0.901094	5371.288936	21.63591
OPT_ceq_sym_3_on_1_sym_7_mc_4_2B_2F_2B_2F	ceq	methane	22-dimethylbutane	0.994547	0.00545297	298	8.00E+06	FALSE	151.7360718	6.542171616	153.351	6.6118	95.866664	4.133336001	0.901094	5371.288936	21.63591
OPT_ceq_sym_3_on_1_sym_7_mc_4_2B_2F_2B_2F	ceq	methane	22-dimethylbutane	0.995633	0.00436714	298	1.00E+07	FALSE	176.4698302	4.303794679	178.348	4.3496	97.61923528	2.380764717	0.901094	5371.288936	21.63591
OPT_ceq_sym_3_on_1_sym_7_mc_4_2B_2F_2B_2F	ceq	methane	methanol	0.995789	0.00421093	298	4.00E+06	FALSE	87.52368473	0.633655994	88.4552	0.6404	99.28122152	0.718778481	0.901094	5371.288936	21.63591
OPT_ceq_sym_3_on_1_sym_7_mc_4_2B_2F_2B_2F	ceq	methane	methanol	0.995789	0.00421093	298	4.00E+06	TRUE	84.63740344	29.11750219	85.5382	29.4274	74.40329977	25.59670023	0.901094	5371.288936	21.63591
OPT_ceq_sym_3_on_1_sym_7_mc_4_2B_2F_2B_2F	ceq	methane	methanol	0.997189	0.00281124	298	6.00E+06	FALSE	123.7004551	0.423096976	125.017	0.4276	99.6591324	0.340867602	0.901094	5371.288936	21.63591
OPT_ceq_sym_3_on_1_sym_7_mc_4_2B_2F_2B_2F	ceq	methane	methanol	0.997189	0.00281124	298	6.00E+06	TRUE	118.5310728	23.1090502	119.7926	23.355	83.68467232	16.31532768	0.901094	5371.288936	21.63591
OPT_ceq_sym_3_on_1_sym_7_mc_4_2B_2F_2B_2F	ceq	methane	methanol	0.99789	0.00210991	298	8.00E+06	FALSE	152.7767954	0.292289164	154.4028	0.2954	99.80904755	0.190952448	0.901094	5371.288936	21.63591
OPT_ceq_sym_3_on_1_sym_7_mc_4_2B_2F_2B_2F	ceq	methane	methanol	0.99789	0.00210991	298	8.00E+06	TRUE	149.8343122	14.39736869	151.429	14.5506	91.23350098	8.766499016	0.901094	5371.288936	21.63591
OPT_ceq_sym_3_on_1_sym_7_mc_4_2B_2F_2B_2F	ceq	methane	methanol	0.998311	0.00168864	298	1.00E+07	FALSE	176.1520127	0.235493639	178.0268	0.238	99.86649075	0.133509251	0.901094	5371.288936	21.63591
OPT_ceq_sym_3_on_1_sym_7_mc_4_2B_2F_2B_2F	ceq	methane	methanol	0.998311	0.00168864	298	1.00E+07	TRUE	174.3517727	15.3377601	176.2074	15.501	91.91428232	8.085717684	0.901094	5371.288936	21.63591
OPT_ceq_sym_3_on_1_sym_7_mc_4_2B_2NH2_2B_2NH2	ceq	methane	22-dimethylbutane	0.989153	0.0108468	298	4.00E+06	FALSE	88.50699702	27.62428575	87.5654	27.3304	76.21288158	23.78711842	0.870555	5858.485141	21.04025
OPT_ceq_sym_3_on_1_sym_7_mc_4_2B_2NH2_2B_2NH2	ceq	methane	22-dimethylbutane	0.992743	0.00725744	298	6.00E+06	FALSE	122.4705239	13.27563514	121.1676	13.1344	90.22024988	9.779750115	0.870555	5858.485141	21.04025
OPT_ceq_sym_3_on_1_sym_7_mc_4_2B_2NH2_2B_2NH2	ceq	methane	22-dimethylbutane	0.994547	0.00545297	298	8.00E+06	FALSE	150.4271452	8.629203274	148.8268	8.5374	94.5747508	5.425249199	0.870555	5858.485141	21.04025
OPT_ceq_sym_3_on_1_sym_7_mc_4_2B_2NH2_2B_2NH2	ceq	methane	22-dimethylbutane	0.995633	0.00436714	298	1.00E+07	FALSE	175.2708493	5.562376304	173.4062	5.5032	96.9240297	3.075970296	0.870555	5858.485141	21.04025
OPT_ceq_sym_3_on_1_sym_7_mc_4_2B_2NH2_2B_2NH2	ceq	methane	methanol	0.995789	0.00421093	298	4.00E+06	FALSE	89.79166418	0.685492733	88.8364	0.6782	99.24235823	0.75764177	0.870555	5858.485141	21.04025
OPT_ceq_sym_3_on_1_sym_7_mc_4_2B_2NH2_2B_2NH2	ceq	methane	methanol	0.995789	0.00421093	298	4.00E+06	TRUE	83.46738221	45.97935938	82.5794	45.4902	64.4800952	35.5199048	0.870555	5858.485141	21.04025
OPT_ceq_sym_3_on_1_sym_7_mc_4_2B_2NH2_2B_2NH2	ceq	methane	methanol	0.997189	0.00281124	298	6.00E+06	FALSE	124.6723484	0.385905523	123.346	0.3818	99.69141939	0.30858061	0.870555	5858.485141	21.04025
OPT_ceq_sym_3_on_1_sym_7_mc_4_2B_2NH2_2B_2NH2	ceq	methane	methanol	0.997189	0.00281124	298	6.00E+06	TRUE	116.7415755	35.2585037	115.4996	34.8834	76.80362807	23.19637193	0.870555	5858.485141	21.04025
OPT_ceq_sym_3_on_1_sym_7_mc_4_2B_2NH2_2B_2NH2	ceq	methane	methanol	0.99789	0.00210991	298	8.00E+06	FALSE	154.1083079	0.308077536	152.4688	0.3048	99.80048909	0.19951091	0.870555	5858.485141	21.04025
OPT_ceq_sym_3_on_1_sym_7_mc_4_2B_2NH2_2B_2NH2	ceq	methane	methanol	0.99789	0.00210991	298	8.00E+06	TRUE	146.8678794	19.76204191	145.3054	19.5518	88.14016009	11.85983991	0.870555	5858.485141	21.04025
OPT_ceq_sym_3_on_1_sym_7_mc_4_2B_2NH2_2B_2NH2	ceq	methane	methanol	0.998311	0.00168864	298	1.00E+07	FALSE	177.6588545	0.214077501	175.7688	0.2118	99.87964582	0.120354175	0.870555	5858.485141	21.04025
OPT_ceq_sym_3_on_1_sym_7_mc_4_2B_2NH2_2B_2NH2	ceq	methane	methanol	0.998311	0.00168864	298	1.00E+07	TRUE	169.3243868	17.96391219	167.523	17.7728	90.40841724	9.591582756	0.870555	5858.485141	21.04025
OPT_ceq_sym_3_on_1_sym_7_mc_4_2B_2NO2_2B_2NO2	ceq	methane	22-dimethylbutane	0.989153	0.0108468	298	4.00E+06	FALSE	88.21151402	34.1504671	87.2954	33.7958	72.09062261	27.90937739	0.842943	4334.324566	20.48591
OPT_ceq_sym_3_on_1_sym_7_mc_4_2B_2NO2_2B_2NO2	ceq	methane	22-dimethylbutane	0.992743	0.00725744	298	6.00E+06	FALSE	121.9187783	17.91586385	120.6526	17.7298	87.18782157	12.81217843	0.842943	4334.324566	20.48591
OPT_ceq_sym_3_on_1_sym_7_mc_4_2B_2NO2_2B_2NO2	ceq	methane	22-dimethylbutane	0.994547	0.00545297	298	8.00E+06	FALSE	151.4795797	11.17323883	149.9064	11.0572	93.13062084	6.869379164	0.842943	4334.324566	20.48591
OPT_ceq_sym_3_on_1_sym_7_mc_4_2B_2NO2_2B_2NO2	ceq	methane	22-dimethylbutane	0.995633	0.00436714	298	1.00E+07	FALSE	173.9935974	7.29859905	172.1866	7.2228	95.97412399	4.025876013	0.842943	4334.324566	20.48591
OPT_ceq_sym_3_on_1_sym_7_mc_4_2B_2NO2_2B_2NO2	ceq	methane	methanol	0.995789	0.00421093	298	4.00E+06	FALSE	92.94022368	0.648131117	91.975	0.6414	99.30746606	0.692533936	0.842943	4334.324566	20.48591
OPT_ceq_sym_3_on_1_sym_7_mc_4_2B_2NO2_2B_2NO2	ceq	methane	methanol	0.995789	0.00421093	298	4.00E+06	TRUE	75.10984765	104.2519002	74.3298	103.1692	41.87617958	58.12382042	0.842943	4334.324566	20.48591
OPT_ceq_sym_3_on_1_sym_7_mc_4_2B_2NO2_2B_2NO2	ceq	methane	methanol	0.997189	0.00281124	298	6.00E+06	FALSE	126.596559	0.461795947	125.2818	0.457	99.63654815	0.363451854	0.842943	4334.324566	20.48591
OPT_ceq_sym_3_on_1_sym_7_mc_4_2B_2NO2_2B_2NO2	ceq	methane	methanol	0.997189	0.00281124	298	6.00E+06	TRUE	102.6761353	102.5484088	101.6098	101.4834	50.03111872	49.96888128	0.842943	4334.324566	20.48591
OPT_ceq_sym_3_on_1_sym_7_mc_4_2B_2NO2_2B_2NO2	ceq	methane	methanol	0.99789	0.00210991	298	8.00E+06	FALSE	156.5391253	0.307998697	154.9134	0.3048	99.80363128	0.196368725	0.842943	4334.324566	20.48591
OPT_ceq_sym_3_on_1_sym_7_mc_4_2B_2NO2_2B_2NO2	ceq	methane	methanol	0.99789	0.00210991	298	8.00E+06	TRUE	128.7953949	87.04560557	127.4578	86.1416	59.6714223	40.3285777	0.842943	4334.324566	20.48591
OPT_ceq_sym_3_on_1_sym_7_mc_4_2B_2NO2_2B_2NO2	ceq	methane	methanol	0.998311	0.00168864	298	1.00E+07	FALSE	177.8813736	0.274450283	176.034	0.2716	99.84594931	0.154050694	0.842943	4334.324566	20.48591
OPT_ceq_sym_3_on_1_sym_7_mc_4_2B_2NO2_2B_2NO2	ceq	methane	methanol	0.998311	0.00168864	298	1.00E+07	TRUE	151.9468324	67.6133938	150.3688	66.9112	69.205081	30.794919	0.842943	4334.324566	20.48591
OPT_ceq_sym_3_on_1_sym_7_mc_4_2B_2OH_2B_2OH	ceq	methane	22-dimethylbutane	0.989153	0.0108468	298	4.00E+06	FALSE	89.34582169	23.79267972	90.1266	24.0006	78.97030682	21.02969318	0.887547	5677.10731	21.59388
OPT_ceq_sym_3_on_1_sym_7_mc_4_2B_2OH_2B_2OH	ceq	methane	22-dimethylbutane	0.992743	0.00725744	298	6.00E+06	FALSE	123.0106305	11.95829841	124.0856	12.0628	91.13996198	8.860038017	0.887547	5677.10731	21.59388
OPT_ceq_sym_3_on_1_sym_7_mc_4_2B_2OH_2B_2OH	ceq	methane	22-dimethylbutane	0.994547	0.00545297	298	8.00E+06	FALSE	151.2556024	7.597209249	152.5774	7.6636	95.21745371	4.78254629	0.887547	5677.10731	21.59388
OPT_ceq_sym_3_on_1_sym_7_mc_4_2B_2OH_2B_2OH	ceq	methane	22-dimethylbutane	0.995633	0.00436714	298	1.00E+07	FALSE	177.1881819	5.15733094	178.7366	5.2024	97.17167104	2.828328957	0.887547	5677.10731	21.59388
OPT_ceq_sym_3_on_1_sym_7_mc_4_2B_2OH_2B_2OH	ceq	methane	methanol	0.995789	0.00421093	298	4.00E+06	FALSE	89.88867776	1.267721591	90.6742	1.2788	98.60928953	1.390710472	0.887547	5677.10731	21.59388
OPT_ceq_sym_3_on_1_sym_7_mc_4_2B_2OH_2B_2OH	ceq	methane	methanol	0.995789	0.00421093	298	4.00E+06	TRUE	77.52928444	116.360148	78.2068	117.377	39.98633834	60.01366166	0.887547	5677.10731	21.59388
OPT_ceq_sym_3_on_1_sym_7_mc_4_2B_2OH_2B_2OH	ceq	methane	methanol	0.997189	0.00281124	298	6.00E+06	FALSE	124.1256862	0.441541443	125.2104	0.4454	99.64553964	0.354460359	0.887547	5677.10731	21.59388
OPT_ceq_sym_3_on_1_sym_7_mc_4_2B_2OH_2B_2OH	ceq	methane	methanol	0.997189	0.00281124	298	6.00E+06	TRUE	106.0175304	99.94935913	106.944	100.8228	51.47309387	48.52690613	0.887547	5677.10731	21.59388
OPT_ceq_sym_3_on_1_sym_7_mc_4_2B_2OH_2B_2OH	ceq	methane	methanol	0.99789	0.00210991	298	8.00E+06	FALSE	153.250767	0.300573339	154.59	0.3032	99.80425222	0.19574778	0.887547	5677.10731	21.59388
OPT_ceq_sym_3_on_1_sym_7_mc_4_2B_2OH_2B_2OH	ceq	methane	methanol	0.99789	0.00210991	298	8.00E+06	TRUE	134.9812215	81.86559019	136.1608	82.581	62.24727053	37.75272947	0.887547	5677.10731	21.59388
OPT_ceq_sym_3_on_1_sym_7_mc_4_2B_2OH_2B_2OH	ceq	methane	methanol	0.998311	0.00168864	298	1.00E+07	FALSE	178.692833	0.251997833	180.2544	0.2542	99.85917568	0.140824315	0.887547	5677.10731	21.59388
OPT_ceq_sym_3_on_1_sym_7_mc_4_2B_2OH_2B_2OH	ceq	methane	methanol	0.998311	0.00168864	298	1.00E+07	TRUE	161.5290246	59.99035425	162.9406	60.5146	72.91868795	27.08131205	0.887547	5677.10731	21.59388
OPT_ceq_sym_3_on_1_sym_7_mc_4_2B_2SH_2B_2SH	ceq	methane	22-dimethylbutane	0.989153	0.0108468	298	4.00E+06	FALSE	84.39711327	56.86393871	84.022	56.6112	59.74549395	40.25450605	0.867508	4835.868192	21.26685
OPT_ceq_sym_3_on_1_sym_7_mc_4_2B_2SH_2B_2SH	ceq	methane	22-dimethylbutane	0.992743	0.00725744	298	6.00E+06	FALSE	125.548817	24.98705803	124.9908	24.876	83.40126032	16.59873968	0.867508	4835.868192	21.26685
OPT_ceq_sym_3_on_1_sym_7_mc_4_2B_2SH_2B_2SH	ceq	methane	22-dimethylbutane	0.994547	0.00545297	298	8.00E+06	FALSE	155.6692912	13.84011408	154.9774	13.7786	91.83519401	8.164805992	0.867508	4835.868192	21.26685
OPT_ceq_sym_3_on_1_sym_7_mc_4_2B_2SH_2B_2SH	ceq	methane	22-dimethylbutane	0.995633	0.00436714	298	1.00E+07	FALSE	180.7365054	8.347099703	179.9332	8.31	95.58549791	4.414502091	0.867508	4835.868192	21.26685
OPT_ceq_sym_3_on_1_sym_7_mc_4_2B_2SH_2B_2SH	ceq	methane	methanol	0.995789	0.00421093	298	4.00E+06	FALSE	97.94673622	0.777656389	97.5114	0.7742	99.2122956	0.787704404	0.867508	4835.868192	21.26685
OPT_ceq_sym_3_on_1_sym_7_mc_4_2B_2SH_2B_2SH	ceq	methane	methanol	0.995789	0.00421093	298	4.00E+06	TRUE	89.93512765	29.90150087	89.5354	29.7686	75.04811239	24.95188761	0.867508	4835.868192	21.26685
OPT_ceq_sym_3_on_1_sym_7_mc_4_2B_2SH_2B_2SH	ceq	methane	methanol	0.997189	0.00281124	298	6.00E+06	FALSE	135.3590197	0.663951011	134.7574	0.661	99.51188317	0.488116829	0.867508	4835.868192	21.26685
OPT_ceq_sym_3_on_1_sym_7_mc_4_2B_2SH_2B_2SH	ceq	methane	methanol	0.997189	0.00281124	298	6.00E+06	TRUE	127.0157369	27.01687982	126.4512	26.8968	82.46028641	17.53971359	0.867508	4835.868192	21.26685
OPT_ceq_sym_3_on_1_sym_7_mc_4_2B_2SH_2B_2SH	ceq	methane	methanol	0.99789	0.00210991	298	8.00E+06	FALSE	162.8399621	0.31037952	162.1162	0.309	99.80975858	0.190241416	0.867508	4835.868192	21.26685
OPT_ceq_sym_3_on_1_sym_7_mc_4_2B_2SH_2B_2SH	ceq	methane	methanol	0.99789	0.00210991	298	8.00E+06	TRUE	153.3399381	23.57940153	152.6584	23.4746	86.67223064	13.32776936	0.867508	4835.868192	21.26685
OPT_ceq_sym_3_on_1_sym_7_mc_4_2B_2SH_2B_2SH	ceq	methane	methanol	0.998311	0.00168864	298	1.00E+07	FALSE	187.9039621	0.242879508	187.0688	0.2418	99.8709096	0.129090399	0.867508	4835.868192	21.26685
OPT_ceq_sym_3_on_1_sym_7_mc_4_2B_2SH_2B_2SH	ceq	methane	methanol	0.998311	0.00168864	298	1.00E+07	TRUE	179.4391391	16.02140911	178.6416	15.9502	91.80325173	8.19674827	0.867508	4835.868192	21.26685
OPT_ceq_sym_3_on_1_sym_7_mc_4_2B_4Br_2B_4Br	ceq	methane	22-dimethylbutane	0.989153	0.0108468	298	4.00E+06	FALSE	72.93070654	80.69638097	69.4796	76.8778	47.47255691	52.52744309	0.836247	2005.900601	20.60398
OPT_ceq_sym_3_on_1_sym_7_mc_4_2B_4Br_2B_4Br	ceq	methane	22-dimethylbutane	0.992743	0.00725744	298	6.00E+06	FALSE	119.2167797	43.27015906	113.5754	41.2226	73.37006938	26.62993062	0.836247	2005.900601	20.60398
OPT_ceq_sym_3_on_1_sym_7_mc_4_2B_4Br_2B_4Br	ceq	methane	22-dimethylbutane	0.994547	0.00545297	298	8.00E+06	FALSE	156.3281004	23.25881527	148.9306	22.1582	87.04871388	12.95128612	0.836247	2005.900601	20.60398
OPT_ceq_sym_3_on_1_sym_7_mc_4_2B_4Br_2B_4Br	ceq	methane	22-dimethylbutane	0.995633	0.00436714	298	1.00E+07	FALSE	181.7750594	14.48944564	173.1734	13.8038	92.61738864	7.382611356	0.836247	2005.900601	20.60398
OPT_ceq_sym_3_on_1_sym_7_mc_4_2B_4Br_2B_4Br	ceq	methane	methanol	0.995789	0.00421093	298	4.00E+06	FALSE	110.0327901	1.325314338	104.826	1.2626	98.8098627	1.1901373	0.836247	2005.900601	20.60398
OPT_ceq_sym_3_on_1_sym_7_mc_4_2B_4Br_2B_4Br	ceq	methane	methanol	0.995789	0.00421093	298	4.00E+06	TRUE	103.2000631	22.28703006	98.3166	21.2324	82.23958377	17.76041623	0.836247	2005.900601	20.60398
OPT_ceq_sym_3_on_1_sym_7_mc_4_2B_4Br_2B_4Br	ceq	methane	methanol	0.997189	0.00281124	298	6.00E+06	FALSE	147.2698613	0.671369437	140.301	0.6396	99.5461918	0.4538082	0.836247	2005.900601	20.60398
OPT_ceq_sym_3_on_1_sym_7_mc_4_2B_4Br_2B_4Br	ceq	methane	methanol	0.997189	0.00281124	298	6.00E+06	TRUE	139.5426049	18.35223414	132.9394	17.4838	88.3769259	11.6230741	0.836247	2005.900601	20.60398
OPT_ceq_sym_3_on_1_sym_7_mc_4_2B_4Br_2B_4Br	ceq	methane	methanol	0.99789	0.00210991	298	8.00E+06	FALSE	173.6144988	0.650795889	165.399	0.62	99.62654877	0.373451231	0.836247	2005.900601	20.60398
OPT_ceq_sym_3_on_1_sym_7_mc_4_2B_4Br_2B_4Br	ceq	methane	methanol	0.99789	0.00210991	298	8.00E+06	TRUE	165.8561721	16.71999606	158.0078	15.9288	90.84218043	9.157819573	0.836247	2005.900601	20.60398
OPT_ceq_sym_3_on_1_sym_7_mc_4_2B_4Br_2B_4Br	ceq	methane	methanol	0.998311	0.00168864	298	1.00E+07	FALSE	194.9112694	0.31154229	185.688	0.2968	99.84041707	0.159582934	0.836247	2005.900601	20.60398
OPT_ceq_sym_3_on_1_sym_7_mc_4_2B_4Br_2B_4Br	ceq	methane	methanol	0.998311	0.00168864	298	1.00E+07	TRUE	190.2249092	10.82231577	181.2234	10.3102	94.61702803	5.382971969	0.836247	2005.900601	20.60398
OPT_ceq_sym_3_on_1_sym_7_mc_4_2B_4CN_2B_4CN	ceq	methane	22-dimethylbutane	0.989153	0.0108468	298	4.00E+06	FALSE	86.26067597	22.37124741	86.8034	22.512	79.40637824	20.59362176	0.809412	4243.304495	20.33278
OPT_ceq_sym_3_on_1_sym_7_mc_4_2B_4CN_2B_4CN	ceq	methane	22-dimethylbutane	0.992743	0.00725744	298	6.00E+06	FALSE	118.2070796	12.52479806	118.9508	12.6036	90.41947666	9.580523342	0.809412	4243.304495	20.33278
OPT_ceq_sym_3_on_1_sym_7_mc_4_2B_4CN_2B_4CN	ceq	methane	22-dimethylbutane	0.994547	0.00545297	298	8.00E+06	FALSE	144.2349209	7.811452887	145.1424	7.8606	94.86245368	5.137546323	0.809412	4243.304495	20.33278
OPT_ceq_sym_3_on_1_sym_7_mc_4_2B_4CN_2B_4CN	ceq	methane	22-dimethylbutane	0.995633	0.00436714	298	1.00E+07	FALSE	167.0740247	4.78986374	168.1252	4.82	97.21299001	2.787009989	0.809412	4243.304495	20.33278
OPT_ceq_sym_3_on_1_sym_7_mc_4_2B_4CN_2B_4CN	ceq	methane	methanol	0.995789	0.00421093	298	4.00E+06	FALSE	88.32170862	0.961152741	88.8774	0.9672	98.92347453	1.076525467	0.809412	4243.304495	20.33278
OPT_ceq_sym_3_on_1_sym_7_mc_4_2B_4CN_2B_4CN	ceq	methane	methanol	0.995789	0.00421093	298	4.00E+06	TRUE	69.43493802	112.7241763	69.8718	113.4334	38.11774025	61.88225975	0.809412	4243.304495	20.33278
OPT_ceq_sym_3_on_1_sym_7_mc_4_2B_4CN_2B_4CN	ceq	methane	methanol	0.997189	0.00281124	298	6.00E+06	FALSE	120.935712	0.441422712	121.6966	0.4442	99.63632136	0.36367864	0.809412	4243.304495	20.33278
OPT_ceq_sym_3_on_1_sym_7_mc_4_2B_4CN_2B_4CN	ceq	methane	methanol	0.997189	0.00281124	298	6.00E+06	TRUE	102.0837225	79.21421003	102.726	79.7126	56.30716307	43.69283693	0.809412	4243.304495	20.33278
OPT_ceq_sym_3_on_1_sym_7_mc_4_2B_4CN_2B_4CN	ceq	methane	methanol	0.99789	0.00210991	298	8.00E+06	FALSE	149.8672839	0.304683034	150.8102	0.3066	99.79711058	0.202889421	0.809412	4243.304495	20.33278
OPT_ceq_sym_3_on_1_sym_7_mc_4_2B_4CN_2B_4CN	ceq	methane	methanol	0.99789	0.00210991	298	8.00E+06	TRUE	125.8607254	73.51208594	126.6526	73.9746	63.12832956	36.87167044	0.809412	4243.304495	20.33278
OPT_ceq_sym_3_on_1_sym_7_mc_4_2B_4CN_2B_4CN	ceq	methane	methanol	0.998311	0.00168864	298	1.00E+07	FALSE	168.9074892	0.228760712	169.9702	0.2302	99.86474767	0.135252326	0.809412	4243.304495	20.33278
OPT_ceq_sym_3_on_1_sym_7_mc_4_2B_4CN_2B_4CN	ceq	methane	methanol	0.998311	0.00168864	298	1.00E+07	TRUE	147.1189754	62.28611608	148.0446	62.678	70.25568211	29.74431789	0.809412	4243.304495	20.33278
OPT_ceq_sym_3_on_1_sym_7_mc_4_2B_4F_2B_4F	ceq	methane	22-dimethylbutane	0.989153	0.0108468	298	4.00E+06	FALSE	88.54581361	23.38625854	88.9174	23.4844	79.10674028	20.89325972	0.887268	4532.640495	21.66543
OPT_ceq_sym_3_on_1_sym_7_mc_4_2B_4F_2B_4F	ceq	methane	22-dimethylbutane	0.992743	0.00725744	298	6.00E+06	FALSE	121.8625983	13.03051686	122.374	13.0852	90.34011717	9.659882828	0.887268	4532.640495	21.66543
OPT_ceq_sym_3_on_1_sym_7_mc_4_2B_4F_2B_4F	ceq	methane	22-dimethylbutane	0.994547	0.00545297	298	8.00E+06	FALSE	151.6960011	7.649100215	152.3326	7.6812	95.19966403	4.800335971	0.887268	4532.640495	21.66543
OPT_ceq_sym_3_on_1_sym_7_mc_4_2B_4F_2B_4F	ceq	methane	22-dimethylbutane	0.995633	0.00436714	298	1.00E+07	FALSE	176.9293084	5.630371897	177.6718	5.654	96.91587327	3.08412673	0.887268	4532.640495	21.66543
OPT_ceq_sym_3_on_1_sym_7_mc_4_2B_4F_2B_4F	ceq	methane	methanol	0.995789	0.00421093	298	4.00E+06	FALSE	89.1705917	1.084050734	89.5448	1.0886	98.79889754	1.201102463	0.887268	4532.640495	21.66543
OPT_ceq_sym_3_on_1_sym_7_mc_4_2B_4F_2B_4F	ceq	methane	methanol	0.995789	0.00421093	298	4.00E+06	TRUE	81.72185067	45.45644006	82.0648	45.6472	64.25770484	35.74229516	0.887268	4532.640495	21.66543
OPT_ceq_sym_3_on_1_sym_7_mc_4_2B_4F_2B_4F	ceq	methane	methanol	0.997189	0.00281124	298	6.00E+06	FALSE	123.4796124	0.381399441	123.9978	0.383	99.69207466	0.307925339	0.887268	4532.640495	21.66543
OPT_ceq_sym_3_on_1_sym_7_mc_4_2B_4F_2B_4F	ceq	methane	methanol	0.997189	0.00281124	298	6.00E+06	TRUE	116.855212	32.2205849	117.3456	32.3558	78.38644128	21.61355872	0.887268	4532.640495	21.66543
OPT_ceq_sym_3_on_1_sym_7_mc_4_2B_4F_2B_4F	ceq	methane	methanol	0.99789	0.00210991	298	8.00E+06	FALSE	151.7418088	0.275842415	152.3786	0.277	99.8185458	0.181454201	0.887268	4532.640495	21.66543
OPT_ceq_sym_3_on_1_sym_7_mc_4_2B_4F_2B_4F	ceq	methane	methanol	0.99789	0.00210991	298	8.00E+06	TRUE	146.5715062	25.20721681	147.1866	25.313	85.32576307	14.67423693	0.887268	4532.640495	21.66543
OPT_ceq_sym_3_on_1_sym_7_mc_4_2B_4F_2B_4F	ceq	methane	methanol	0.998311	0.00168864	298	1.00E+07	FALSE	178.0330764	0.213902349	178.7802	0.2148	99.87999665	0.120003352	0.887268	4532.640495	21.66543
OPT_ceq_sym_3_on_1_sym_7_mc_4_2B_4F_2B_4F	ceq	methane	methanol	0.998311	0.00168864	298	1.00E+07	TRUE	172.172869	23.47349246	172.8954	23.572	88.00208075	11.99791925	0.887268	4532.640495	21.66543
OPT_ceq_sym_3_on_1_sym_7_mc_4_2B_4H_2B_4H	ceq	methane	22-dimethylbutane	0.989153	0.0108468	298	4.00E+06	FALSE	87.1141271	16.28768921	87.4966	16.3592	84.24815947	15.75184053	0.913991	6581.767286	22.17331
OPT_ceq_sym_3_on_1_sym_7_mc_4_2B_4H_2B_4H	ceq	methane	22-dimethylbutane	0.992743	0.00725744	298	6.00E+06	FALSE	123.0161002	10.57676293	123.5562	10.6232	92.08283835	7.917161651	0.913991	6581.767286	22.17331
OPT_ceq_sym_3_on_1_sym_7_mc_4_2B_4H_2B_4H	ceq	methane	22-dimethylbutane	0.994547	0.00545297	298	8.00E+06	FALSE	152.8638542	6.833198971	153.535	6.8632	95.72114899	4.27885101	0.913991	6581.767286	22.17331
OPT_ceq_sym_3_on_1_sym_7_mc_4_2B_4H_2B_4H	ceq	methane	22-dimethylbutane	0.995633	0.00436714	298	1.00E+07	FALSE	176.0424888	4.610756562	176.8154	4.631	97.44773112	2.552268879	0.913991	6581.767286	22.17331
OPT_ceq_sym_3_on_1_sym_7_mc_4_2B_4H_2B_4H	ceq	methane	methanol	0.995789	0.00421093	298	4.00E+06	FALSE	85.65792054	0.538236881	86.034	0.5406	99.37556743	0.62443257	0.913991	6581.767286	22.17331
OPT_ceq_sym_3_on_1_sym_7_mc_4_2B_4H_2B_4H	ceq	methane	methanol	0.995789	0.00421093	298	4.00E+06	TRUE	85.8672017	13.25759279	86.2442	13.3158	86.62535155	13.37464845	0.913991	6581.767286	22.17331
OPT_ceq_sym_3_on_1_sym_7_mc_4_2B_4H_2B_4H	ceq	methane	methanol	0.997189	0.00281124	298	6.00E+06	FALSE	121.4455954	0.418164059	121.9788	0.42	99.65685938	0.343140619	0.913991	6581.767286	22.17331
OPT_ceq_sym_3_on_1_sym_7_mc_4_2B_4H_2B_4H	ceq	methane	methanol	0.997189	0.00281124	298	6.00E+06	TRUE	120.7000687	7.462834568	121.23	7.4956	94.17707123	5.822928773	0.913991	6581.767286	22.17331
OPT_ceq_sym_3_on_1_sym_7_mc_4_2B_4H_2B_4H	ceq	methane	methanol	0.99789	0.00210991	298	8.00E+06	FALSE	150.2545105	0.251694938	150.9142	0.2528	99.83276773	0.167232266	0.913991	6581.767286	22.17331
OPT_ceq_sym_3_on_1_sym_7_mc_4_2B_4H_2B_4H	ceq	methane	methanol	0.99789	0.00210991	298	8.00E+06	TRUE	150.0135683	8.710954721	150.6722	8.7492	94.51190367	5.488096328	0.913991	6581.767286	22.17331
OPT_ceq_sym_3_on_1_sym_7_mc_4_2B_4H_2B_4H	ceq	methane	methanol	0.998311	0.00168864	298	1.00E+07	FALSE	177.5699824	0.202311754	178.3496	0.2032	99.88619613	0.113803872	0.913991	6581.767286	22.17331
OPT_ceq_sym_3_on_1_sym_7_mc_4_2B_4H_2B_4H	ceq	methane	methanol	0.998311	0.00168864	298	1.00E+07	TRUE	174.5532274	7.535515464	175.3196	7.5686	95.86162475	4.138375248	0.913991	6581.767286	22.17331
OPT_ceq_sym_3_on_1_sym_7_mc_4_ntn_edge_ntn_edge	ceq	methane	22-dimethylbutane	0.989153	0.0108468	298	4.00E+06	FALSE	47.87779687	67.06296884	27.557	38.5994	41.65432218	58.34567782	0.656982	1316.288412	7.38913
OPT_ceq_sym_3_on_1_sym_7_mc_4_ntn_edge_ntn_edge	ceq	methane	22-dimethylbutane	0.992743	0.00725744	298	6.00E+06	FALSE	68.39347713	60.04591887	39.3652	34.5606	53.24960974	46.75039026	0.656982	1316.288412	7.38913
OPT_ceq_sym_3_on_1_sym_7_mc_4_ntn_edge_ntn_edge	ceq	methane	22-dimethylbutane	0.994547	0.00545297	298	8.00E+06	FALSE	66.07056047	61.33021206	38.0282	35.2998	51.86040803	48.13959197	0.656982	1316.288412	7.38913
OPT_ceq_sym_3_on_1_sym_7_mc_4_ntn_edge_ntn_edge	ceq	methane	22-dimethylbutane	0.995633	0.00436714	298	1.00E+07	FALSE	88.10786407	53.43438031	50.7122	30.7552	62.24845767	37.75154233	0.656982	1316.288412	7.38913
OPT_ceq_sym_3_on_1_sym_7_mc_4_ntn_edge_ntn_edge	ceq	methane	methanol	0.995789	0.00421093	298	4.00E+06	FALSE	134.8514799	80.31002222	77.6164	46.224	62.67453916	37.32546084	0.656982	1316.288412	7.38913
OPT_ceq_sym_3_on_1_sym_7_mc_4_ntn_edge_ntn_edge	ceq	methane	methanol	0.995789	0.00421093	298	4.00E+06	TRUE	3.969286015	310.2627874	2.2846	178.5778	1.263170233	98.73682977	0.656982	1316.288412	7.38913
OPT_ceq_sym_3_on_1_sym_7_mc_4_ntn_edge_ntn_edge	ceq	methane	methanol	0.997189	0.00281124	298	6.00E+06	FALSE	192.4580757	15.05673924	110.773	8.6662	92.74425817	7.255741834	0.656982	1316.288412	7.38913
OPT_ceq_sym_3_on_1_sym_7_mc_4_ntn_edge_ntn_edge	ceq	methane	methanol	0.997189	0.00281124	298	6.00E+06	TRUE	8.968160971	301.188992	5.1618	173.3552	2.891489326	97.10851067	0.656982	1316.288412	7.38913
OPT_ceq_sym_3_on_1_sym_7_mc_4_ntn_edge_ntn_edge	ceq	methane	methanol	0.99789	0.00210991	298	8.00E+06	FALSE	209.5336849	3.662111995	120.6012	2.1078	98.28227758	1.717722416	0.656982	1316.288412	7.38913
OPT_ceq_sym_3_on_1_sym_7_mc_4_ntn_edge_ntn_edge	ceq	methane	methanol	0.99789	0.00210991	298	8.00E+06	TRUE	15.3670406	286.5495785	8.8448	164.9292	5.089829319	94.91017068	0.656982	1316.288412	7.38913
OPT_ceq_sym_3_on_1_sym_7_mc_4_ntn_edge_ntn_edge	ceq	methane	methanol	0.998311	0.00168864	298	1.00E+07	FALSE	221.6211911	1.073024181	127.5584	0.6176	99.51816253	0.481837473	0.656982	1316.288412	7.38913
OPT_ceq_sym_3_on_1_sym_7_mc_4_ntn_edge_ntn_edge	ceq	methane	methanol	0.998311	0.00168864	298	1.00E+07	TRUE	16.39767198	291.5349017	9.438	167.7986	5.325085225	94.67491477	0.656982	1316.288412	7.38913
OPT_ceq_sym_3_on_2_sym_7_mc_4_1B_2Br_ntn_edge	ceq	methane	22-dimethylbutane	0.989153	0.0108468	298	4.00E+06	FALSE	60.72669329	76.70621307	71.5046	90.3202	44.18642878	55.81357122	0.708685	1885.683991	9.38982
OPT_ceq_sym_3_on_2_sym_7_mc_4_1B_2Br_ntn_edge	ceq	methane	22-dimethylbutane	0.992743	0.00725744	298	6.00E+06	FALSE	77.01534726	71.15657501	90.6842	83.7856	51.97701837	48.02298163	0.708685	1885.683991	9.38982
OPT_ceq_sym_3_on_2_sym_7_mc_4_1B_2Br_ntn_edge	ceq	methane	22-dimethylbutane	0.994547	0.00545297	298	8.00E+06	FALSE	93.21516762	65.80141972	109.7592	77.48	58.6197762	41.3802238	0.708685	1885.683991	9.38982
OPT_ceq_sym_3_on_2_sym_7_mc_4_1B_2Br_ntn_edge	ceq	methane	22-dimethylbutane	0.995633	0.00436714	298	1.00E+07	FALSE	114.418036	57.1784443	134.7252	67.3266	66.67854481	33.32145519	0.708685	1885.683991	9.38982
OPT_ceq_sym_3_on_2_sym_7_mc_4_1B_2Br_ntn_edge	ceq	methane	methanol	0.995789	0.00421093	298	4.00E+06	FALSE	159.567084	45.7275705	187.8874	53.8434	77.7258835	22.2741165	0.708685	1885.683991	9.38982
OPT_ceq_sym_3_on_2_sym_7_mc_4_1B_2Br_ntn_edge	ceq	methane	methanol	0.995789	0.00421093	298	4.00E+06	TRUE	29.62915295	269.8918097	34.8878	317.7928	9.892180063	90.10781994	0.708685	1885.683991	9.38982
OPT_ceq_sym_3_on_2_sym_7_mc_4_1B_2Br_ntn_edge	ceq	methane	methanol	0.997189	0.00281124	298	6.00E+06	FALSE	195.5880109	17.92536662	230.3014	21.1068	91.60456978	8.395430221	0.708685	1885.683991	9.38982
OPT_ceq_sym_3_on_2_sym_7_mc_4_1B_2Br_ntn_edge	ceq	methane	methanol	0.997189	0.00281124	298	6.00E+06	TRUE	62.54039376	228.5232011	73.6402	269.082	21.48684853	78.51315147	0.708685	1885.683991	9.38982
OPT_ceq_sym_3_on_2_sym_7_mc_4_1B_2Br_ntn_edge	ceq	methane	methanol	0.99789	0.00210991	298	8.00E+06	FALSE	218.2672498	1.502358176	257.0058	1.769	99.31639402	0.683605977	0.708685	1885.683991	9.38982
OPT_ceq_sym_3_on_2_sym_7_mc_4_1B_2Br_ntn_edge	ceq	methane	methanol	0.99789	0.00210991	298	8.00E+06	TRUE	112.0382124	166.1205589	131.923	195.604	40.27851139	59.72148861	0.708685	1885.683991	9.38982
OPT_ceq_sym_3_on_2_sym_7_mc_4_1B_2Br_ntn_edge	ceq	methane	methanol	0.998311	0.00168864	298	1.00E+07	FALSE	227.3112932	0.556781244	267.655	0.6556	99.75565632	0.244343682	0.708685	1885.683991	9.38982
OPT_ceq_sym_3_on_2_sym_7_mc_4_1B_2Br_ntn_edge	ceq	methane	methanol	0.998311	0.00168864	298	1.00E+07	TRUE	139.5785014	135.5529629	164.3512	159.6112	50.73156638	49.26843362	0.708685	1885.683991	9.38982
OPT_ceq_sym_3_on_2_sym_7_mc_4_1B_2CF3_ntn_edge	ceq	methane	22-dimethylbutane	0.989153	0.0108468	298	4.00E+06	FALSE	37.55294337	75.08028191	44.2924	88.5546	33.34091097	66.65908903	0.630862	1838.556116	8.17125
OPT_ceq_sym_3_on_2_sym_7_mc_4_1B_2CF3_ntn_edge	ceq	methane	22-dimethylbutane	0.992743	0.00725744	298	6.00E+06	FALSE	51.42617697	71.2081889	60.6554	83.9876	41.93455611	58.06544389	0.630862	1838.556116	8.17125
OPT_ceq_sym_3_on_2_sym_7_mc_4_1B_2CF3_ntn_edge	ceq	methane	22-dimethylbutane	0.994547	0.00545297	298	8.00E+06	FALSE	69.12826366	64.73746111	81.5344	76.3556	51.64000253	48.35999747	0.630862	1838.556116	8.17125
OPT_ceq_sym_3_on_2_sym_7_mc_4_1B_2CF3_ntn_edge	ceq	methane	22-dimethylbutane	0.995633	0.00436714	298	1.00E+07	FALSE	89.24178169	56.83082862	105.2576	67.03	61.09412401	38.90587599	0.630862	1838.556116	8.17125
OPT_ceq_sym_3_on_2_sym_7_mc_4_1B_2CF3_ntn_edge	ceq	methane	methanol	0.995789	0.00421093	298	4.00E+06	FALSE	141.0101476	41.62495744	166.3166	49.0952	77.20867659	22.79132341	0.630862	1838.556116	8.17125
OPT_ceq_sym_3_on_2_sym_7_mc_4_1B_2CF3_ntn_edge	ceq	methane	methanol	0.995789	0.00421093	298	4.00E+06	TRUE	20.57728744	249.6273163	24.2702	294.4268	7.615446647	92.38455335	0.630862	1838.556116	8.17125
OPT_ceq_sym_3_on_2_sym_7_mc_4_1B_2CF3_ntn_edge	ceq	methane	methanol	0.997189	0.00281124	298	6.00E+06	FALSE	178.687215	6.042906877	210.7554	7.1274	96.72879181	3.271208191	0.630862	1838.556116	8.17125
OPT_ceq_sym_3_on_2_sym_7_mc_4_1B_2CF3_ntn_edge	ceq	methane	methanol	0.997189	0.00281124	298	6.00E+06	TRUE	39.89146032	223.4027249	47.0506	263.4958	15.15090821	84.84909179	0.630862	1838.556116	8.17125
OPT_ceq_sym_3_on_2_sym_7_mc_4_1B_2CF3_ntn_edge	ceq	methane	methanol	0.99789	0.00210991	298	8.00E+06	FALSE	191.1008043	3.477507485	225.3968	4.1016	98.212798	1.787202002	0.630862	1838.556116	8.17125
OPT_ceq_sym_3_on_2_sym_7_mc_4_1B_2CF3_ntn_edge	ceq	methane	methanol	0.99789	0.00210991	298	8.00E+06	TRUE	72.17506757	180.7347527	85.128	213.1704	28.53786678	71.46213322	0.630862	1838.556116	8.17125
OPT_ceq_sym_3_on_2_sym_7_mc_4_1B_2CF3_ntn_edge	ceq	methane	methanol	0.998311	0.00168864	298	1.00E+07	FALSE	200.6561498	0.959587227	236.667	1.1318	99.52405142	0.475948575	0.630862	1838.556116	8.17125
OPT_ceq_sym_3_on_2_sym_7_mc_4_1B_2CF3_ntn_edge	ceq	methane	methanol	0.998311	0.00168864	298	1.00E+07	TRUE	78.12013351	175.7312997	92.14	207.269	30.77395803	69.22604197	0.630862	1838.556116	8.17125
OPT_ceq_sym_3_on_2_sym_7_mc_4_1B_2CH3_ntn_edge	ceq	methane	22-dimethylbutane	0.989153	0.0108468	298	4.00E+06	FALSE	47.89371418	79.50180942	56.2904	93.44	37.59450319	62.40549681	0.667652	2478.310228	10.54353
OPT_ceq_sym_3_on_2_sym_7_mc_4_1B_2CH3_ntn_edge	ceq	methane	22-dimethylbutane	0.992743	0.00725744	298	6.00E+06	FALSE	56.46398201	77.51103102	66.3632	91.1002	42.14515881	57.85484119	0.667652	2478.310228	10.54353
OPT_ceq_sym_3_on_2_sym_7_mc_4_1B_2CH3_ntn_edge	ceq	methane	22-dimethylbutane	0.994547	0.00545297	298	8.00E+06	FALSE	77.75794267	69.32976391	91.3904	81.4846	52.86501808	47.13498192	0.667652	2478.310228	10.54353
OPT_ceq_sym_3_on_2_sym_7_mc_4_1B_2CH3_ntn_edge	ceq	methane	22-dimethylbutane	0.995633	0.00436714	298	1.00E+07	FALSE	97.46867381	60.77957573	114.5568	71.4354	61.59226032	38.40773968	0.667652	2478.310228	10.54353
OPT_ceq_sym_3_on_2_sym_7_mc_4_1B_2CH3_ntn_edge	ceq	methane	methanol	0.995789	0.00421093	298	4.00E+06	FALSE	162.711718	15.40364574	191.2382	18.1042	91.35187138	8.648128616	0.667652	2478.310228	10.54353
OPT_ceq_sym_3_on_2_sym_7_mc_4_1B_2CH3_ntn_edge	ceq	methane	methanol	0.995789	0.00421093	298	4.00E+06	TRUE	23.25530025	269.3191861	27.3324	316.536	7.948505882	92.05149412	0.667652	2478.310228	10.54353
OPT_ceq_sym_3_on_2_sym_7_mc_4_1B_2CH3_ntn_edge	ceq	methane	methanol	0.997189	0.00281124	298	6.00E+06	FALSE	183.828195	10.67267548	216.0568	12.5438	94.51278781	5.487212195	0.667652	2478.310228	10.54353
OPT_ceq_sym_3_on_2_sym_7_mc_4_1B_2CH3_ntn_edge	ceq	methane	methanol	0.997189	0.00281124	298	6.00E+06	TRUE	53.25753381	225.3292626	62.5946	264.8338	19.11703444	80.88296556	0.667652	2478.310228	10.54353
OPT_ceq_sym_3_on_2_sym_7_mc_4_1B_2CH3_ntn_edge	ceq	methane	methanol	0.99789	0.00210991	298	8.00E+06	FALSE	201.5850738	1.437907298	236.9268	1.69	99.29175146	0.708248539	0.667652	2478.310228	10.54353
OPT_ceq_sym_3_on_2_sym_7_mc_4_1B_2CH3_ntn_edge	ceq	methane	methanol	0.99789	0.00210991	298	8.00E+06	TRUE	70.65536129	208.3102258	83.0426	244.831	25.32762626	74.67237374	0.667652	2478.310228	10.54353
OPT_ceq_sym_3_on_2_sym_7_mc_4_1B_2CH3_ntn_edge	ceq	methane	methanol	0.998311	0.00168864	298	1.00E+07	FALSE	211.1870614	0.735800137	248.2122	0.8648	99.65279813	0.347201869	0.667652	2478.310228	10.54353
OPT_ceq_sym_3_on_2_sym_7_mc_4_1B_2CH3_ntn_edge	ceq	methane	methanol	0.998311	0.00168864	298	1.00E+07	TRUE	104.4589453	161.4458491	122.7726	189.7504	39.28434067	60.71565933	0.667652	2478.310228	10.54353
OPT_ceq_sym_3_on_2_sym_7_mc_4_1B_2CN_ntn_edge	ceq	methane	22-dimethylbutane	0.989153	0.0108468	298	4.00E+06	FALSE	52.15662672	79.77962139	61.5744	94.1852	39.53168858	60.46831142	0.692729	2175.650817	9.21776
OPT_ceq_sym_3_on_2_sym_7_mc_4_1B_2CN_ntn_edge	ceq	methane	22-dimethylbutane	0.992743	0.00725744	298	6.00E+06	FALSE	68.12640875	74.29496936	80.4278	87.7102	47.83439794	52.16560206	0.692729	2175.650817	9.21776
OPT_ceq_sym_3_on_2_sym_7_mc_4_1B_2CN_ntn_edge	ceq	methane	22-dimethylbutane	0.994547	0.00545297	298	8.00E+06	FALSE	92.70612035	64.38481725	109.4458	76.0106	59.01430201	40.98569799	0.692729	2175.650817	9.21776
OPT_ceq_sym_3_on_2_sym_7_mc_4_1B_2CN_ntn_edge	ceq	methane	22-dimethylbutane	0.995633	0.00436714	298	1.00E+07	FALSE	117.8184573	53.18613191	139.0926	62.7898	68.89783359	31.10216641	0.692729	2175.650817	9.21776
OPT_ceq_sym_3_on_2_sym_7_mc_4_1B_2CN_ntn_edge	ceq	methane	methanol	0.995789	0.00421093	298	4.00E+06	FALSE	161.9435205	34.09056411	191.1852	40.2462	82.60987921	17.39012079	0.692729	2175.650817	9.21776
OPT_ceq_sym_3_on_2_sym_7_mc_4_1B_2CN_ntn_edge	ceq	methane	methanol	0.995789	0.00421093	298	4.00E+06	TRUE	15.66264151	300.2445062	18.4908	354.4588	4.957988962	95.04201104	0.692729	2175.650817	9.21776
OPT_ceq_sym_3_on_2_sym_7_mc_4_1B_2CN_ntn_edge	ceq	methane	methanol	0.997189	0.00281124	298	6.00E+06	FALSE	195.9143117	9.390571328	231.29	11.0862	95.42603605	4.573963945	0.692729	2175.650817	9.21776
OPT_ceq_sym_3_on_2_sym_7_mc_4_1B_2CN_ntn_edge	ceq	methane	methanol	0.997189	0.00281124	298	6.00E+06	TRUE	40.01754591	264.0271676	47.2434	311.7018	13.16173054	86.83826946	0.692729	2175.650817	9.21776
OPT_ceq_sym_3_on_2_sym_7_mc_4_1B_2CN_ntn_edge	ceq	methane	methanol	0.99789	0.00210991	298	8.00E+06	FALSE	214.0593194	1.045260325	252.7114	1.234	99.51406877	0.485931228	0.692729	2175.650817	9.21776
OPT_ceq_sym_3_on_2_sym_7_mc_4_1B_2CN_ntn_edge	ceq	methane	methanol	0.99789	0.00210991	298	8.00E+06	TRUE	53.83734434	246.5071138	63.5586	291.0182	17.92519984	82.07480016	0.692729	2175.650817	9.21776
OPT_ceq_sym_3_on_2_sym_7_mc_4_1B_2CN_ntn_edge	ceq	methane	methanol	0.998311	0.00168864	298	1.00E+07	FALSE	221.6314427	4.208146918	261.6508	4.968	98.13666553	1.863334469	0.692729	2175.650817	9.21776
OPT_ceq_sym_3_on_2_sym_7_mc_4_1B_2CN_ntn_edge	ceq	methane	methanol	0.998311	0.00168864	298	1.00E+07	TRUE	87.00157401	208.2656634	102.7112	245.8716	29.46536662	70.53463338	0.692729	2175.650817	9.21776
OPT_ceq_sym_3_on_2_sym_7_mc_4_1B_2F_ntn_edge	ceq	methane	22-dimethylbutane	0.989153	0.0108468	298	4.00E+06	FALSE	58.36468838	84.29055565	69.047	99.718	40.91310402	59.08689598	0.727223	2636.859031	9.76786
OPT_ceq_sym_3_on_2_sym_7_mc_4_1B_2F_ntn_edge	ceq	methane	22-dimethylbutane	0.992743	0.00725744	298	6.00E+06	FALSE	75.01435117	78.15341741	88.744	92.4576	48.97528499	51.02471501	0.727223	2636.859031	9.76786
OPT_ceq_sym_3_on_2_sym_7_mc_4_1B_2F_ntn_edge	ceq	methane	22-dimethylbutane	0.994547	0.00545297	298	8.00E+06	FALSE	94.603761	69.18354577	111.9188	81.846	57.76012981	42.23987019	0.727223	2636.859031	9.76786
OPT_ceq_sym_3_on_2_sym_7_mc_4_1B_2F_ntn_edge	ceq	methane	22-dimethylbutane	0.995633	0.00436714	298	1.00E+07	FALSE	122.2372817	57.19159593	144.61	67.6592	68.12575729	31.87424271	0.727223	2636.859031	9.76786
OPT_ceq_sym_3_on_2_sym_7_mc_4_1B_2F_ntn_edge	ceq	methane	methanol	0.995789	0.00421093	298	4.00E+06	FALSE	148.1345781	54.9493816	175.2472	65.0066	72.94252994	27.05747006	0.727223	2636.859031	9.76786
OPT_ceq_sym_3_on_2_sym_7_mc_4_1B_2F_ntn_edge	ceq	methane	methanol	0.995789	0.00421093	298	4.00E+06	TRUE	33.91114596	276.917949	40.1178	327.6014	10.90990082	89.09009918	0.727223	2636.859031	9.76786
OPT_ceq_sym_3_on_2_sym_7_mc_4_1B_2F_ntn_edge	ceq	methane	methanol	0.997189	0.00281124	298	6.00E+06	FALSE	195.7838725	5.173339404	231.6176	6.1202	97.42565128	2.574348715	0.727223	2636.859031	9.76786
OPT_ceq_sym_3_on_2_sym_7_mc_4_1B_2F_ntn_edge	ceq	methane	methanol	0.997189	0.00281124	298	6.00E+06	TRUE	60.00421145	241.0962802	70.9866	285.2234	19.92830072	80.07169928	0.727223	2636.859031	9.76786
OPT_ceq_sym_3_on_2_sym_7_mc_4_1B_2F_ntn_edge	ceq	methane	methanol	0.99789	0.00210991	298	8.00E+06	FALSE	212.3260145	0.945371522	251.1874	1.1184	99.55672838	0.443271617	0.727223	2636.859031	9.76786
OPT_ceq_sym_3_on_2_sym_7_mc_4_1B_2F_ntn_edge	ceq	methane	methanol	0.99789	0.00210991	298	8.00E+06	TRUE	113.7110178	164.0971898	134.5232	194.1314	40.93148247	59.06851753	0.727223	2636.859031	9.76786
OPT_ceq_sym_3_on_2_sym_7_mc_4_1B_2F_ntn_edge	ceq	methane	methanol	0.998311	0.00168864	298	1.00E+07	FALSE	222.2272259	0.588321334	262.9008	0.696	99.73596038	0.264039624	0.727223	2636.859031	9.76786
OPT_ceq_sym_3_on_2_sym_7_mc_4_1B_2F_ntn_edge	ceq	methane	methanol	0.998311	0.00168864	298	1.00E+07	TRUE	154.94575	108.3133386	183.305	128.1376	58.85675242	41.14324758	0.727223	2636.859031	9.76786
OPT_ceq_sym_3_on_2_sym_7_mc_4_1B_2NH2_ntn_edge	ceq	methane	22-dimethylbutane	0.989153	0.0108468	298	4.00E+06	FALSE	41.96135733	86.64281838	49.3058	101.8078	32.62830083	67.37169917	0.698156	2641.791679	9.81671
OPT_ceq_sym_3_on_2_sym_7_mc_4_1B_2NH2_ntn_edge	ceq	methane	22-dimethylbutane	0.992743	0.00725744	298	6.00E+06	FALSE	64.61442065	76.4411954	75.9238	89.8206	45.80776183	54.19223817	0.698156	2641.791679	9.81671
OPT_ceq_sym_3_on_2_sym_7_mc_4_1B_2NH2_ntn_edge	ceq	methane	22-dimethylbutane	0.994547	0.00545297	298	8.00E+06	FALSE	88.05435835	66.54884145	103.4664	78.1968	56.9550685	43.0449315	0.698156	2641.791679	9.81671
OPT_ceq_sym_3_on_2_sym_7_mc_4_1B_2NH2_ntn_edge	ceq	methane	22-dimethylbutane	0.995633	0.00436714	298	1.00E+07	FALSE	108.1251869	57.5366362	127.0502	67.6072	65.26862066	34.73137934	0.698156	2641.791679	9.81671
OPT_ceq_sym_3_on_2_sym_7_mc_4_1B_2NH2_ntn_edge	ceq	methane	methanol	0.995789	0.00421093	298	4.00E+06	FALSE	156.2307345	31.00690168	183.5756	36.434	83.43981354	16.56018646	0.698156	2641.791679	9.81671
OPT_ceq_sym_3_on_2_sym_7_mc_4_1B_2NH2_ntn_edge	ceq	methane	methanol	0.995789	0.00421093	298	4.00E+06	TRUE	22.98990615	280.7529674	27.0138	329.8928	7.56887096	92.43112904	0.698156	2641.791679	9.81671
OPT_ceq_sym_3_on_2_sym_7_mc_4_1B_2NH2_ntn_edge	ceq	methane	methanol	0.997189	0.00281124	298	6.00E+06	FALSE	190.2241164	5.950322643	223.5188	6.9918	96.96682061	3.033179385	0.698156	2641.791679	9.81671
OPT_ceq_sym_3_on_2_sym_7_mc_4_1B_2NH2_ntn_edge	ceq	methane	methanol	0.997189	0.00281124	298	6.00E+06	TRUE	41.27575707	259.6033567	48.5002	305.0414	13.71838562	86.28161438	0.698156	2641.791679	9.81671
OPT_ceq_sym_3_on_2_sym_7_mc_4_1B_2NH2_ntn_edge	ceq	methane	methanol	0.99789	0.00210991	298	8.00E+06	FALSE	206.2410866	0.978188856	242.3392	1.1494	99.52794505	0.472054955	0.698156	2641.791679	9.81671
OPT_ceq_sym_3_on_2_sym_7_mc_4_1B_2NH2_ntn_edge	ceq	methane	methanol	0.99789	0.00210991	298	8.00E+06	TRUE	64.19860102	229.328352	75.4352	269.4674	21.87145008	78.12854992	0.698156	2641.791679	9.81671
OPT_ceq_sym_3_on_2_sym_7_mc_4_1B_2NH2_ntn_edge	ceq	methane	methanol	0.998311	0.00168864	298	1.00E+07	FALSE	214.92547	0.523902088	252.5436	0.6156	99.75683285	0.243167145	0.698156	2641.791679	9.81671
OPT_ceq_sym_3_on_2_sym_7_mc_4_1B_2NH2_ntn_edge	ceq	methane	methanol	0.998311	0.00168864	298	1.00E+07	TRUE	90.52442563	192.7443952	106.3688	226.4802	31.95707363	68.04292637	0.698156	2641.791679	9.81671
OPT_ceq_sym_3_on_2_sym_7_mc_4_1B_2NO2_ntn_edge	ceq	methane	22-dimethylbutane	0.989153	0.0108468	298	4.00E+06	FALSE	71.44785939	65.85218187	84.131	77.542	52.03775522	47.96224478	0.666081	1878.052344	8.56934
OPT_ceq_sym_3_on_2_sym_7_mc_4_1B_2NO2_ntn_edge	ceq	methane	22-dimethylbutane	0.992743	0.00725744	298	6.00E+06	FALSE	88.16066791	60.65904664	103.8106	71.427	59.23991198	40.76008802	0.666081	1878.052344	8.56934
OPT_ceq_sym_3_on_2_sym_7_mc_4_1B_2NO2_ntn_edge	ceq	methane	22-dimethylbutane	0.994547	0.00545297	298	8.00E+06	FALSE	106.2319293	53.48462203	125.0898	62.979	66.51278681	33.48721319	0.666081	1878.052344	8.56934
OPT_ceq_sym_3_on_2_sym_7_mc_4_1B_2NO2_ntn_edge	ceq	methane	22-dimethylbutane	0.995633	0.00436714	298	1.00E+07	FALSE	127.182472	46.56038511	149.7594	54.8256	73.20155437	26.79844563	0.666081	1878.052344	8.56934
OPT_ceq_sym_3_on_2_sym_7_mc_4_1B_2NO2_ntn_edge	ceq	methane	methanol	0.995789	0.00421093	298	4.00E+06	FALSE	148.3001462	50.3126907	174.6258	59.244	74.66795627	25.33204373	0.666081	1878.052344	8.56934
OPT_ceq_sym_3_on_2_sym_7_mc_4_1B_2NO2_ntn_edge	ceq	methane	methanol	0.995789	0.00421093	298	4.00E+06	TRUE	14.30519799	287.9446142	16.8446	339.0594	4.732905503	95.2670945	0.666081	1878.052344	8.56934
OPT_ceq_sym_3_on_2_sym_7_mc_4_1B_2NO2_ntn_edge	ceq	methane	methanol	0.997189	0.00281124	298	6.00E+06	FALSE	192.6372071	6.435751008	226.8334	7.5782	96.76713951	3.23286049	0.666081	1878.052344	8.56934
OPT_ceq_sym_3_on_2_sym_7_mc_4_1B_2NO2_ntn_edge	ceq	methane	methanol	0.997189	0.00281124	298	6.00E+06	TRUE	27.91622285	270.0002301	32.8718	317.9296	9.370487119	90.62951288	0.666081	1878.052344	8.56934
OPT_ceq_sym_3_on_2_sym_7_mc_4_1B_2NO2_ntn_edge	ceq	methane	methanol	0.99789	0.00210991	298	8.00E+06	FALSE	208.5082436	1.719382108	245.5218	2.0246	99.18213313	0.817866873	0.666081	1878.052344	8.56934
OPT_ceq_sym_3_on_2_sym_7_mc_4_1B_2NO2_ntn_edge	ceq	methane	methanol	0.99789	0.00210991	298	8.00E+06	TRUE	45.91478881	245.8748686	54.0654	289.5216	15.73557789	84.26442211	0.666081	1878.052344	8.56934
OPT_ceq_sym_3_on_2_sym_7_mc_4_1B_2NO2_ntn_edge	ceq	methane	methanol	0.998311	0.00168864	298	1.00E+07	FALSE	218.9789291	0.580034565	257.8512	0.683	99.73581832	0.264181683	0.666081	1878.052344	8.56934
OPT_ceq_sym_3_on_2_sym_7_mc_4_1B_2NO2_ntn_edge	ceq	methane	methanol	0.998311	0.00168864	298	1.00E+07	TRUE	67.01055251	217.5484602	78.906	256.1668	23.54891236	76.45108764	0.666081	1878.052344	8.56934
OPT_ceq_sym_3_on_2_sym_7_mc_4_1B_2OH_ntn_edge	ceq	methane	22-dimethylbutane	0.989153	0.0108468	298	4.00E+06	FALSE	55.29240718	81.86238896	65.3662	96.777	40.3138707	59.6861293	0.709263	2702.572717	9.92015
OPT_ceq_sym_3_on_2_sym_7_mc_4_1B_2OH_ntn_edge	ceq	methane	22-dimethylbutane	0.992743	0.00725744	298	6.00E+06	FALSE	72.36291078	74.77334986	85.5468	88.3964	49.18088204	50.81911796	0.709263	2702.572717	9.92015
OPT_ceq_sym_3_on_2_sym_7_mc_4_1B_2OH_ntn_edge	ceq	methane	22-dimethylbutane	0.994547	0.00545297	298	8.00E+06	FALSE	93.72206056	66.06105395	110.7974	78.0968	58.6557978	41.3442022	0.709263	2702.572717	9.92015
OPT_ceq_sym_3_on_2_sym_7_mc_4_1B_2OH_ntn_edge	ceq	methane	22-dimethylbutane	0.995633	0.00436714	298	1.00E+07	FALSE	123.5234992	53.19629963	146.0284	62.8882	69.89794013	30.10205987	0.709263	2702.572717	9.92015
OPT_ceq_sym_3_on_2_sym_7_mc_4_1B_2OH_ntn_edge	ceq	methane	methanol	0.995789	0.00421093	298	4.00E+06	FALSE	161.933528	29.63243044	191.4364	35.0312	84.53147382	15.46852618	0.709263	2702.572717	9.92015
OPT_ceq_sym_3_on_2_sym_7_mc_4_1B_2OH_ntn_edge	ceq	methane	methanol	0.995789	0.00421093	298	4.00E+06	TRUE	19.32276185	297.0872943	22.8432	351.214	6.106873494	93.89312651	0.709263	2702.572717	9.92015
OPT_ceq_sym_3_on_2_sym_7_mc_4_1B_2OH_ntn_edge	ceq	methane	methanol	0.997189	0.00281124	298	6.00E+06	FALSE	193.5169118	7.380700876	228.774	8.7254	96.32613809	3.673861913	0.709263	2702.572717	9.92015
OPT_ceq_sym_3_on_2_sym_7_mc_4_1B_2OH_ntn_edge	ceq	methane	methanol	0.997189	0.00281124	298	6.00E+06	TRUE	37.07877213	277.3766087	43.8342	327.9122	11.79142555	88.20857445	0.709263	2702.572717	9.92015
OPT_ceq_sym_3_on_2_sym_7_mc_4_1B_2OH_ntn_edge	ceq	methane	methanol	0.99789	0.00210991	298	8.00E+06	FALSE	211.8682572	1.508047026	250.4688	1.7828	99.29324532	0.706754685	0.709263	2702.572717	9.92015
OPT_ceq_sym_3_on_2_sym_7_mc_4_1B_2OH_ntn_edge	ceq	methane	methanol	0.99789	0.00210991	298	8.00E+06	TRUE	60.68290554	243.1626861	71.7388	287.4648	19.97162612	80.02837388	0.709263	2702.572717	9.92015
OPT_ceq_sym_3_on_2_sym_7_mc_4_1B_2OH_ntn_edge	ceq	methane	methanol	0.998311	0.00168864	298	1.00E+07	FALSE	221.4286393	0.499073225	261.771	0.59	99.77511902	0.224880985	0.709263	2702.572717	9.92015
OPT_ceq_sym_3_on_2_sym_7_mc_4_1B_2OH_ntn_edge	ceq	methane	methanol	0.998311	0.00168864	298	1.00E+07	TRUE	98.45073707	189.7143122	116.3876	224.2786	34.16470434	65.83529566	0.709263	2702.572717	9.92015
OPT_ceq_sym_3_on_2_sym_7_mc_4_1B_2SH_ntn_edge	ceq	methane	22-dimethylbutane	0.989153	0.0108468	298	4.00E+06	FALSE	49.83791658	80.9441648	58.7024	95.3414	38.10760316	61.89239684	0.697315	2249.707782	9.65295
OPT_ceq_sym_3_on_2_sym_7_mc_4_1B_2SH_ntn_edge	ceq	methane	22-dimethylbutane	0.992743	0.00725744	298	6.00E+06	FALSE	62.8685981	76.76779928	74.0508	90.4222	45.0230737	54.9769263	0.697315	2249.707782	9.65295
OPT_ceq_sym_3_on_2_sym_7_mc_4_1B_2SH_ntn_edge	ceq	methane	22-dimethylbutane	0.994547	0.00545297	298	8.00E+06	FALSE	80.6487153	69.27509798	94.9934	81.5968	53.79313235	46.20686765	0.697315	2249.707782	9.65295
OPT_ceq_sym_3_on_2_sym_7_mc_4_1B_2SH_ntn_edge	ceq	methane	22-dimethylbutane	0.995633	0.00436714	298	1.00E+07	FALSE	100.6683058	61.51360555	118.5738	72.4548	62.07122912	37.92877088	0.697315	2249.707782	9.65295
OPT_ceq_sym_3_on_2_sym_7_mc_4_1B_2SH_ntn_edge	ceq	methane	methanol	0.995789	0.00421093	298	4.00E+06	FALSE	154.1879647	53.41862873	181.6128	62.92	74.26930048	25.73069952	0.697315	2249.707782	9.65295
OPT_ceq_sym_3_on_2_sym_7_mc_4_1B_2SH_ntn_edge	ceq	methane	methanol	0.995789	0.00421093	298	4.00E+06	TRUE	18.33705649	285.6675785	21.5986	336.4782	6.031834511	93.96816549	0.697315	2249.707782	9.65295
OPT_ceq_sym_3_on_2_sym_7_mc_4_1B_2SH_ntn_edge	ceq	methane	methanol	0.997189	0.00281124	298	6.00E+06	FALSE	195.6773952	10.80530152	230.4818	12.7272	94.76696997	5.233030028	0.697315	2249.707782	9.65295
OPT_ceq_sym_3_on_2_sym_7_mc_4_1B_2SH_ntn_edge	ceq	methane	methanol	0.997189	0.00281124	298	6.00E+06	TRUE	44.26461826	255.1923018	52.1378	300.5824	14.78163145	85.21836855	0.697315	2249.707782	9.65295
OPT_ceq_sym_3_on_2_sym_7_mc_4_1B_2SH_ntn_edge	ceq	methane	methanol	0.99789	0.00210991	298	8.00E+06	FALSE	212.5492598	3.834561007	250.3546	4.5166	98.22788922	1.772110776	0.697315	2249.707782	9.65295
OPT_ceq_sym_3_on_2_sym_7_mc_4_1B_2SH_ntn_edge	ceq	methane	methanol	0.99789	0.00210991	298	8.00E+06	TRUE	68.97812029	216.179723	81.247	254.6308	24.18945224	75.81054776	0.697315	2249.707782	9.65295
OPT_ceq_sym_3_on_2_sym_7_mc_4_1B_2SH_ntn_edge	ceq	methane	methanol	0.998311	0.00168864	298	1.00E+07	FALSE	221.9324984	2.62084086	261.4068	3.087	98.83286489	1.167135109	0.697315	2249.707782	9.65295
OPT_ceq_sym_3_on_2_sym_7_mc_4_1B_2SH_ntn_edge	ceq	methane	methanol	0.998311	0.00168864	298	1.00E+07	TRUE	90.59449648	195.8533065	106.7082	230.689	31.62687776	68.37312224	0.697315	2249.707782	9.65295
OPT_ceq_sym_3_on_2_sym_7_mc_4_1B_4Br_1B_4Br	ceq	methane	22-dimethylbutane	0.989153	0.0108468	298	4.00E+06	FALSE	36.15880785	93.37166176	49.2682	127.2236	27.91529125	72.08470875	0.739854	1452.83797	12.53811
OPT_ceq_sym_3_on_2_sym_7_mc_4_1B_4Br_1B_4Br	ceq	methane	22-dimethylbutane	0.992743	0.00725744	298	6.00E+06	FALSE	58.03542896	83.60806	79.0762	113.9202	40.97288861	59.02711139	0.739854	1452.83797	12.53811
OPT_ceq_sym_3_on_2_sym_7_mc_4_1B_4Br_1B_4Br	ceq	methane	22-dimethylbutane	0.994547	0.00545297	298	8.00E+06	FALSE	83.69451552	71.18914372	114.038	96.9988	54.03702103	45.96297897	0.739854	1452.83797	12.53811
OPT_ceq_sym_3_on_2_sym_7_mc_4_1B_4Br_1B_4Br	ceq	methane	22-dimethylbutane	0.995633	0.00436714	298	1.00E+07	FALSE	112.5617035	57.68623088	153.371	78.6004	66.1163402	33.8836598	0.739854	1452.83797	12.53811
OPT_ceq_sym_3_on_2_sym_7_mc_4_1B_4Br_1B_4Br	ceq	methane	methanol	0.995789	0.00421093	298	4.00E+06	FALSE	142.0800233	34.98409905	193.5912	47.6676	80.24213003	19.75786997	0.739854	1452.83797	12.53811
OPT_ceq_sym_3_on_2_sym_7_mc_4_1B_4Br_1B_4Br	ceq	methane	methanol	0.995789	0.00421093	298	4.00E+06	TRUE	111.317566	97.14532019	151.6758	132.3654	53.39922518	46.60077482	0.739854	1452.83797	12.53811
OPT_ceq_sym_3_on_2_sym_7_mc_4_1B_4Br_1B_4Br	ceq	methane	methanol	0.997189	0.00281124	298	6.00E+06	FALSE	180.3795225	4.619278492	245.7762	6.294	97.50307652	2.496923476	0.739854	1452.83797	12.53811
OPT_ceq_sym_3_on_2_sym_7_mc_4_1B_4Br_1B_4Br	ceq	methane	methanol	0.997189	0.00281124	298	6.00E+06	TRUE	149.6515594	61.72131082	203.9078	84.0984	70.79979528	29.20020472	0.739854	1452.83797	12.53811
OPT_ceq_sym_3_on_2_sym_7_mc_4_1B_4Br_1B_4Br	ceq	methane	methanol	0.99789	0.00210991	298	8.00E+06	FALSE	196.9403771	5.801326465	268.3412	7.9046	97.13856283	2.861437169	0.739854	1452.83797	12.53811
OPT_ceq_sym_3_on_2_sym_7_mc_4_1B_4Br_1B_4Br	ceq	methane	methanol	0.99789	0.00210991	298	8.00E+06	TRUE	175.8913217	38.87797321	239.6608	52.9732	81.89779725	18.10220275	0.739854	1452.83797	12.53811
OPT_ceq_sym_3_on_2_sym_7_mc_4_1B_4Br_1B_4Br	ceq	methane	methanol	0.998311	0.00168864	298	1.00E+07	FALSE	210.1077428	0.592711997	286.2824	0.8076	99.71869449	0.281305514	0.739854	1452.83797	12.53811
OPT_ceq_sym_3_on_2_sym_7_mc_4_1B_4Br_1B_4Br	ceq	methane	methanol	0.998311	0.00168864	298	1.00E+07	TRUE	189.3788223	34.59380158	258.0382	47.1358	84.5544509	15.4455491	0.739854	1452.83797	12.53811
OPT_ceq_sym_3_on_2_sym_7_mc_4_1B_4Br_ntn_edge	ceq	methane	22-dimethylbutane	0.989153	0.0108468	298	4.00E+06	FALSE	68.81813678	67.46111014	81.0182	79.4206	50.49788455	49.50211545	0.678896	1320.822708	8.27163
OPT_ceq_sym_3_on_2_sym_7_mc_4_1B_4Br_ntn_edge	ceq	methane	22-dimethylbutane	0.992743	0.00725744	298	6.00E+06	FALSE	85.03314407	62.36665412	100.1078	73.423	57.68877917	42.31122083	0.678896	1320.822708	8.27163
OPT_ceq_sym_3_on_2_sym_7_mc_4_1B_4Br_ntn_edge	ceq	methane	22-dimethylbutane	0.994547	0.00545297	298	8.00E+06	FALSE	109.8386328	53.53205057	129.3108	63.0222	67.23276817	32.76723183	0.678896	1320.822708	8.27163
OPT_ceq_sym_3_on_2_sym_7_mc_4_1B_4Br_ntn_edge	ceq	methane	22-dimethylbutane	0.995633	0.00436714	298	1.00E+07	FALSE	132.863916	45.0052753	156.418	52.9838	74.69754319	25.30245681	0.678896	1320.822708	8.27163
OPT_ceq_sym_3_on_2_sym_7_mc_4_1B_4Br_ntn_edge	ceq	methane	methanol	0.995789	0.00421093	298	4.00E+06	FALSE	134.2318151	94.08825595	158.0284	110.7682	58.79107102	41.20892898	0.678896	1320.822708	8.27163
OPT_ceq_sym_3_on_2_sym_7_mc_4_1B_4Br_ntn_edge	ceq	methane	methanol	0.995789	0.00421093	298	4.00E+06	TRUE	31.22163571	251.4216318	36.7566	295.9936	11.0463044	88.9536956	0.678896	1320.822708	8.27163
OPT_ceq_sym_3_on_2_sym_7_mc_4_1B_4Br_ntn_edge	ceq	methane	methanol	0.997189	0.00281124	298	6.00E+06	FALSE	191.0286802	31.40595893	224.8942	36.9736	85.88081467	14.11918533	0.678896	1320.822708	8.27163
OPT_ceq_sym_3_on_2_sym_7_mc_4_1B_4Br_ntn_edge	ceq	methane	methanol	0.997189	0.00281124	298	6.00E+06	TRUE	61.8252365	212.033543	72.7856	249.6228	22.57559046	77.42440954	0.678896	1320.822708	8.27163
OPT_ceq_sym_3_on_2_sym_7_mc_4_1B_4Br_ntn_edge	ceq	methane	methanol	0.99789	0.00210991	298	8.00E+06	FALSE	214.4348414	11.06992609	252.4498	13.0324	95.09104565	4.908954348	0.678896	1320.822708	8.27163
OPT_ceq_sym_3_on_2_sym_7_mc_4_1B_4Br_ntn_edge	ceq	methane	methanol	0.99789	0.00210991	298	8.00E+06	TRUE	95.82599073	175.1342424	112.814	206.182	35.36533373	64.63466627	0.678896	1320.822708	8.27163
OPT_ceq_sym_3_on_2_sym_7_mc_4_1B_4Br_ntn_edge	ceq	methane	methanol	0.998311	0.00168864	298	1.00E+07	FALSE	230.057636	0.97326059	270.8422	1.1458	99.57873141	0.421268585	0.678896	1320.822708	8.27163
OPT_ceq_sym_3_on_2_sym_7_mc_4_1B_4Br_ntn_edge	ceq	methane	methanol	0.998311	0.00168864	298	1.00E+07	TRUE	138.8725133	122.1578796	163.4918	143.814	53.20166427	46.79833573	0.678896	1320.822708	8.27163
OPT_ceq_sym_3_on_2_sym_7_mc_4_1B_4CN_1B_4CN	ceq	methane	22-dimethylbutane	0.989153	0.0108468	298	4.00E+06	FALSE	35.47430072	89.47444638	50.214	126.6514	28.39108158	71.60891842	0.702663	2755.476461	12.23078
OPT_ceq_sym_3_on_2_sym_7_mc_4_1B_4CN_1B_4CN	ceq	methane	22-dimethylbutane	0.992743	0.00725744	298	6.00E+06	FALSE	60.19271208	77.23371444	85.203	109.3246	43.79995435	56.20004565	0.702663	2755.476461	12.23078
OPT_ceq_sym_3_on_2_sym_7_mc_4_1B_4CN_1B_4CN	ceq	methane	22-dimethylbutane	0.994547	0.00545297	298	8.00E+06	FALSE	92.8352291	60.26971648	131.4086	85.312	60.63502962	39.36497038	0.702663	2755.476461	12.23078
OPT_ceq_sym_3_on_2_sym_7_mc_4_1B_4CN_1B_4CN	ceq	methane	22-dimethylbutane	0.995633	0.00436714	298	1.00E+07	FALSE	126.6445393	42.92013136	179.2658	60.7536	74.68804605	25.31195395	0.702663	2755.476461	12.23078
OPT_ceq_sym_3_on_2_sym_7_mc_4_1B_4CN_1B_4CN	ceq	methane	methanol	0.995789	0.00421093	298	4.00E+06	FALSE	130.4392312	14.87753204	184.6372	21.0592	89.76199875	10.23800125	0.702663	2755.476461	12.23078
OPT_ceq_sym_3_on_2_sym_7_mc_4_1B_4CN_1B_4CN	ceq	methane	methanol	0.995789	0.00421093	298	4.00E+06	TRUE	27.59441961	273.6446611	39.06	387.345	9.160305344	90.83969466	0.702663	2755.476461	12.23078
OPT_ceq_sym_3_on_2_sym_7_mc_4_1B_4CN_1B_4CN	ceq	methane	methanol	0.997189	0.00281124	298	6.00E+06	FALSE	161.6590744	2.937470474	228.829	4.158	98.21535107	1.784648929	0.702663	2755.476461	12.23078
OPT_ceq_sym_3_on_2_sym_7_mc_4_1B_4CN_1B_4CN	ceq	methane	methanol	0.997189	0.00281124	298	6.00E+06	TRUE	56.12603218	222.8861886	79.4466	315.4962	20.11597629	79.88402371	0.702663	2755.476461	12.23078
OPT_ceq_sym_3_on_2_sym_7_mc_4_1B_4CN_1B_4CN	ceq	methane	methanol	0.99789	0.00210991	298	8.00E+06	FALSE	179.0090833	1.858561165	253.388	2.6308	98.97241921	1.027580787	0.702663	2755.476461	12.23078
OPT_ceq_sym_3_on_2_sym_7_mc_4_1B_4CN_1B_4CN	ceq	methane	methanol	0.99789	0.00210991	298	8.00E+06	TRUE	82.83850418	186.0061691	117.2582	263.2924	30.81277496	69.18722504	0.702663	2755.476461	12.23078
OPT_ceq_sym_3_on_2_sym_7_mc_4_1B_4CN_1B_4CN	ceq	methane	methanol	0.998311	0.00168864	298	1.00E+07	FALSE	194.0120831	0.464004475	274.6248	0.6568	99.76140795	0.238592045	0.702663	2755.476461	12.23078
OPT_ceq_sym_3_on_2_sym_7_mc_4_1B_4CN_1B_4CN	ceq	methane	methanol	0.998311	0.00168864	298	1.00E+07	TRUE	100.2431934	160.9780446	141.8946	227.865	38.37482516	61.62517484	0.702663	2755.476461	12.23078
OPT_ceq_sym_3_on_2_sym_7_mc_4_1B_4CN_ntn_edge	ceq	methane	22-dimethylbutane	0.989153	0.0108468	298	4.00E+06	FALSE	72.13177616	60.60787536	85.5336	71.8686	54.34079066	45.65920934	0.633591	1722.796866	8.12328
OPT_ceq_sym_3_on_2_sym_7_mc_4_1B_4CN_ntn_edge	ceq	methane	22-dimethylbutane	0.992743	0.00725744	298	6.00E+06	FALSE	104.7898279	48.55690263	124.2594	57.5786	68.33522146	31.66477854	0.633591	1722.796866	8.12328
OPT_ceq_sym_3_on_2_sym_7_mc_4_1B_4CN_ntn_edge	ceq	methane	22-dimethylbutane	0.994547	0.00545297	298	8.00E+06	FALSE	133.162827	39.37455053	157.904	46.6902	77.17911847	22.82088153	0.633591	1722.796866	8.12328
OPT_ceq_sym_3_on_2_sym_7_mc_4_1B_4CN_ntn_edge	ceq	methane	22-dimethylbutane	0.995633	0.00436714	298	1.00E+07	FALSE	151.014627	31.3849833	179.0726	37.2162	82.79328379	17.20671621	0.633591	1722.796866	8.12328
OPT_ceq_sym_3_on_2_sym_7_mc_4_1B_4CN_ntn_edge	ceq	methane	methanol	0.995789	0.00421093	298	4.00E+06	FALSE	158.7149371	33.85808916	188.2036	40.1488	82.4180521	17.5819479	0.633591	1722.796866	8.12328
OPT_ceq_sym_3_on_2_sym_7_mc_4_1B_4CN_ntn_edge	ceq	methane	methanol	0.995789	0.00421093	298	4.00E+06	TRUE	18.36217425	271.599578	21.7738	322.0618	6.332619426	93.66738057	0.633591	1722.796866	8.12328
OPT_ceq_sym_3_on_2_sym_7_mc_4_1B_4CN_ntn_edge	ceq	methane	methanol	0.997189	0.00281124	298	6.00E+06	FALSE	194.7728981	4.983148907	230.961	5.909	97.5053827	2.494617301	0.633591	1722.796866	8.12328
OPT_ceq_sym_3_on_2_sym_7_mc_4_1B_4CN_ntn_edge	ceq	methane	methanol	0.997189	0.00281124	298	6.00E+06	TRUE	29.32240324	251.4887056	34.7704	298.2144	10.4420382	89.5579618	0.633591	1722.796866	8.12328
OPT_ceq_sym_3_on_2_sym_7_mc_4_1B_4CN_ntn_edge	ceq	methane	methanol	0.99789	0.00210991	298	8.00E+06	FALSE	203.6174181	7.342407221	241.4488	8.7066	96.51952346	3.480476536	0.633591	1722.796866	8.12328
OPT_ceq_sym_3_on_2_sym_7_mc_4_1B_4CN_ntn_edge	ceq	methane	methanol	0.99789	0.00210991	298	8.00E+06	TRUE	53.61999781	220.8515741	63.5824	261.885	19.53572001	80.46427999	0.633591	1722.796866	8.12328
OPT_ceq_sym_3_on_2_sym_7_mc_4_1B_4CN_ntn_edge	ceq	methane	methanol	0.998311	0.00168864	298	1.00E+07	FALSE	216.5859177	0.634172953	256.8268	0.752	99.70805051	0.291949493	0.633591	1722.796866	8.12328
OPT_ceq_sym_3_on_2_sym_7_mc_4_1B_4CN_ntn_edge	ceq	methane	methanol	0.998311	0.00168864	298	1.00E+07	TRUE	63.26229396	214.0225771	75.0162	253.7872	22.81491006	77.18508994	0.633591	1722.796866	8.12328
OPT_ceq_sym_3_on_2_sym_7_mc_4_1B_4F_ntn_edge	ceq	methane	22-dimethylbutane	0.989153	0.0108468	298	4.00E+06	FALSE	54.55137893	82.87091399	64.3582	97.7688	39.69616412	60.30383588	0.710546	2479.775435	9.41089
OPT_ceq_sym_3_on_2_sym_7_mc_4_1B_4F_ntn_edge	ceq	methane	22-dimethylbutane	0.992743	0.00725744	298	6.00E+06	FALSE	70.98997624	76.17674028	83.752	89.8712	48.23779311	51.76220689	0.710546	2479.775435	9.41089
OPT_ceq_sym_3_on_2_sym_7_mc_4_1B_4F_ntn_edge	ceq	methane	22-dimethylbutane	0.994547	0.00545297	298	8.00E+06	FALSE	86.77048039	69.76601113	102.3694	82.308	55.43147131	44.56852869	0.710546	2479.775435	9.41089
OPT_ceq_sym_3_on_2_sym_7_mc_4_1B_4F_ntn_edge	ceq	methane	22-dimethylbutane	0.995633	0.00436714	298	1.00E+07	FALSE	117.6866184	56.45717059	138.8434	66.6066	67.58014115	32.41985885	0.710546	2479.775435	9.41089
OPT_ceq_sym_3_on_2_sym_7_mc_4_1B_4F_ntn_edge	ceq	methane	methanol	0.995789	0.00421093	298	4.00E+06	FALSE	153.9129342	45.06734459	181.5822	53.1692	77.3508486	22.6491514	0.710546	2479.775435	9.41089
OPT_ceq_sym_3_on_2_sym_7_mc_4_1B_4F_ntn_edge	ceq	methane	methanol	0.995789	0.00421093	298	4.00E+06	TRUE	35.84675094	266.1259535	42.291	313.968	11.870858	88.129142	0.710546	2479.775435	9.41089
OPT_ceq_sym_3_on_2_sym_7_mc_4_1B_4F_ntn_edge	ceq	methane	methanol	0.997189	0.00281124	298	6.00E+06	FALSE	193.3775022	9.366384509	228.1414	11.0502	95.38018894	4.619811064	0.710546	2479.775435	9.41089
OPT_ceq_sym_3_on_2_sym_7_mc_4_1B_4F_ntn_edge	ceq	methane	methanol	0.997189	0.00281124	298	6.00E+06	TRUE	77.44834171	209.938157	91.3714	247.6792	26.94919283	73.05080717	0.710546	2479.775435	9.41089
OPT_ceq_sym_3_on_2_sym_7_mc_4_1B_4F_ntn_edge	ceq	methane	methanol	0.99789	0.00210991	298	8.00E+06	FALSE	211.6974797	0.99646356	249.7548	1.1756	99.53150356	0.468496444	0.710546	2479.775435	9.41089
OPT_ceq_sym_3_on_2_sym_7_mc_4_1B_4F_ntn_edge	ceq	methane	methanol	0.99789	0.00210991	298	8.00E+06	TRUE	113.080814	162.2606474	133.4096	191.4306	41.06930115	58.93069885	0.710546	2479.775435	9.41089
OPT_ceq_sym_3_on_2_sym_7_mc_4_1B_4F_ntn_edge	ceq	methane	methanol	0.998311	0.00168864	298	1.00E+07	FALSE	220.9884259	0.500435595	260.716	0.5904	99.77405835	0.225941653	0.710546	2479.775435	9.41089
OPT_ceq_sym_3_on_2_sym_7_mc_4_1B_4F_ntn_edge	ceq	methane	methanol	0.998311	0.00168864	298	1.00E+07	TRUE	141.9599486	125.9677087	167.4804	148.6132	52.98443246	47.01556754	0.710546	2479.775435	9.41089
OPT_ceq_sym_3_on_2_sym_7_mc_4_1B_4H_ntn_edge	ceq	methane	22-dimethylbutane	0.989153	0.0108468	298	4.00E+06	FALSE	54.83539907	91.459892	65.0404	108.4808	37.48268223	62.51731777	0.751034	2955.407072	10.98485
OPT_ceq_sym_3_on_2_sym_7_mc_4_1B_4H_ntn_edge	ceq	methane	22-dimethylbutane	0.992743	0.00725744	298	6.00E+06	FALSE	72.72592816	82.6827411	86.2604	98.0702	46.79657094	53.20342906	0.751034	2955.407072	10.98485
OPT_ceq_sym_3_on_2_sym_7_mc_4_1B_4H_ntn_edge	ceq	methane	22-dimethylbutane	0.994547	0.00545297	298	8.00E+06	FALSE	93.98716109	74.27301209	111.4784	88.0954	55.8582339	44.1417661	0.751034	2955.407072	10.98485
OPT_ceq_sym_3_on_2_sym_7_mc_4_1B_4H_ntn_edge	ceq	methane	22-dimethylbutane	0.995633	0.00436714	298	1.00E+07	FALSE	121.9680498	62.12313392	144.6666	73.6844	66.25415043	33.74584957	0.751034	2955.407072	10.98485
OPT_ceq_sym_3_on_2_sym_7_mc_4_1B_4H_ntn_edge	ceq	methane	methanol	0.995789	0.00421093	298	4.00E+06	FALSE	133.3026526	85.09838408	158.1106	100.9354	61.03572339	38.96427661	0.751034	2955.407072	10.98485
OPT_ceq_sym_3_on_2_sym_7_mc_4_1B_4H_ntn_edge	ceq	methane	methanol	0.995789	0.00421093	298	4.00E+06	TRUE	37.03002283	283.4527541	43.9214	336.204	11.55445019	88.44554981	0.751034	2955.407072	10.98485
OPT_ceq_sym_3_on_2_sym_7_mc_4_1B_4H_ntn_edge	ceq	methane	methanol	0.997189	0.00281124	298	6.00E+06	FALSE	197.2195608	8.26066937	233.9226	9.798	95.9798228	4.020177203	0.751034	2955.407072	10.98485
OPT_ceq_sym_3_on_2_sym_7_mc_4_1B_4H_ntn_edge	ceq	methane	methanol	0.997189	0.00281124	298	6.00E+06	TRUE	62.87332208	245.2742639	74.5742	290.9204	20.40363934	79.59636066	0.751034	2955.407072	10.98485
OPT_ceq_sym_3_on_2_sym_7_mc_4_1B_4H_ntn_edge	ceq	methane	methanol	0.99789	0.00210991	298	8.00E+06	FALSE	216.3121783	0.84191717	256.5684	0.9986	99.61229505	0.387704947	0.751034	2955.407072	10.98485
OPT_ceq_sym_3_on_2_sym_7_mc_4_1B_4H_ntn_edge	ceq	methane	methanol	0.99789	0.00210991	298	8.00E+06	TRUE	108.838155	188.996325	129.0932	224.169	36.54316822	63.45683178	0.751034	2955.407072	10.98485
OPT_ceq_sym_3_on_2_sym_7_mc_4_1B_4H_ntn_edge	ceq	methane	methanol	0.998311	0.00168864	298	1.00E+07	FALSE	227.067236	0.59505822	269.325	0.7058	99.73862241	0.261377591	0.751034	2955.407072	10.98485
OPT_ceq_sym_3_on_2_sym_7_mc_4_1B_4H_ntn_edge	ceq	methane	methanol	0.998311	0.00168864	298	1.00E+07	TRUE	148.7146437	131.1502247	176.3908	155.5576	53.13801784	46.86198216	0.751034	2955.407072	10.98485
OPT_ceq_sym_3_on_2_sym_7_mc_4_2B_2Br_2B_2Br	ceq	methane	22-dimethylbutane	0.989153	0.0108468	298	4.00E+06	FALSE	85.47066876	55.61330632	85.7662	55.8056	60.58141523	39.41858477	0.874741	3297.58566	21.11872
OPT_ceq_sym_3_on_2_sym_7_mc_4_2B_2Br_2B_2Br	ceq	methane	22-dimethylbutane	0.992743	0.00725744	298	6.00E+06	FALSE	127.1760644	22.6925362	127.6158	22.771	84.85837853	15.14162147	0.874741	3297.58566	21.11872
OPT_ceq_sym_3_on_2_sym_7_mc_4_2B_2Br_2B_2Br	ceq	methane	22-dimethylbutane	0.994547	0.00545297	298	8.00E+06	FALSE	156.6300216	14.18335832	157.1716	14.2324	91.69657651	8.303423491	0.874741	3297.58566	21.11872
OPT_ceq_sym_3_on_2_sym_7_mc_4_2B_2Br_2B_2Br	ceq	methane	22-dimethylbutane	0.995633	0.00436714	298	1.00E+07	FALSE	180.0809356	8.739581221	180.7036	8.7698	95.3714875	4.628512498	0.874741	3297.58566	21.11872
OPT_ceq_sym_3_on_2_sym_7_mc_4_2B_2Br_2B_2Br	ceq	methane	methanol	0.995789	0.00421093	298	4.00E+06	FALSE	97.58557913	0.743230139	97.923	0.7458	99.24413796	0.755862035	0.874741	3297.58566	21.11872
OPT_ceq_sym_3_on_2_sym_7_mc_4_2B_2Br_2B_2Br	ceq	methane	methanol	0.995789	0.00421093	298	4.00E+06	TRUE	93.70858459	21.28360784	94.0326	21.3572	81.49125833	18.50874167	0.874741	3297.58566	21.11872
OPT_ceq_sym_3_on_2_sym_7_mc_4_2B_2Br_2B_2Br	ceq	methane	methanol	0.997189	0.00281124	298	6.00E+06	FALSE	133.220963	0.564647623	133.6816	0.5666	99.57794592	0.422054076	0.874741	3297.58566	21.11872
OPT_ceq_sym_3_on_2_sym_7_mc_4_2B_2Br_2B_2Br	ceq	methane	methanol	0.997189	0.00281124	298	6.00E+06	TRUE	126.5562076	19.91055543	126.9938	19.9794	86.40609308	13.59390692	0.874741	3297.58566	21.11872
OPT_ceq_sym_3_on_2_sym_7_mc_4_2B_2Br_2B_2Br	ceq	methane	methanol	0.99789	0.00210991	298	8.00E+06	FALSE	162.6673464	0.32806565	163.2298	0.3292	99.79872706	0.201272935	0.874741	3297.58566	21.11872
OPT_ceq_sym_3_on_2_sym_7_mc_4_2B_2Br_2B_2Br	ceq	methane	methanol	0.99789	0.00210991	298	8.00E+06	TRUE	158.3714005	12.49240511	158.919	12.5356	92.68867677	7.311323231	0.874741	3297.58566	21.11872
OPT_ceq_sym_3_on_2_sym_7_mc_4_2B_2Br_2B_2Br	ceq	methane	methanol	0.998311	0.00168864	298	1.00E+07	FALSE	185.3744323	0.230204025	186.0154	0.231	99.87597076	0.124029243	0.874741	3297.58566	21.11872
OPT_ceq_sym_3_on_2_sym_7_mc_4_2B_2Br_2B_2Br	ceq	methane	methanol	0.998311	0.00168864	298	1.00E+07	TRUE	182.1190883	9.500350714	182.7488	9.5332	95.04207362	4.957926379	0.874741	3297.58566	21.11872
OPT_ceq_sym_3_on_2_sym_7_mc_4_2B_2CF3_2B_2CF3	ceq	methane	22-dimethylbutane	0.989153	0.0108468	298	4.00E+06	FALSE	82.05272483	42.07687755	81.3642	41.7238	66.10246328	33.89753672	0.809702	3608.336185	19.74905
OPT_ceq_sym_3_on_2_sym_7_mc_4_2B_2CF3_2B_2CF3	ceq	methane	22-dimethylbutane	0.992743	0.00725744	298	6.00E+06	FALSE	119.2992699	19.08898038	118.2982	18.9288	86.20621306	13.79378694	0.809702	3608.336185	19.74905
OPT_ceq_sym_3_on_2_sym_7_mc_4_2B_2CF3_2B_2CF3	ceq	methane	22-dimethylbutane	0.994547	0.00545297	298	8.00E+06	FALSE	148.2209589	10.73911458	146.9772	10.649	93.24414342	6.755856577	0.809702	3608.336185	19.74905
OPT_ceq_sym_3_on_2_sym_7_mc_4_2B_2CF3_2B_2CF3	ceq	methane	22-dimethylbutane	0.995633	0.00436714	298	1.00E+07	FALSE	170.6874811	6.551777596	169.2552	6.4968	96.30342756	3.696572443	0.809702	3608.336185	19.74905
OPT_ceq_sym_3_on_2_sym_7_mc_4_2B_2CF3_2B_2CF3	ceq	methane	methanol	0.995789	0.00421093	298	4.00E+06	FALSE	94.06028324	1.177682225	93.271	1.1678	98.76343198	1.236568021	0.809702	3608.336185	19.74905
OPT_ceq_sym_3_on_2_sym_7_mc_4_2B_2CF3_2B_2CF3	ceq	methane	methanol	0.995789	0.00421093	298	4.00E+06	TRUE	82.6279517	42.74851341	81.9346	42.3898	65.90387728	34.09612272	0.809702	3608.336185	19.74905
OPT_ceq_sym_3_on_2_sym_7_mc_4_2B_2CF3_2B_2CF3	ceq	methane	methanol	0.997189	0.00281124	298	6.00E+06	FALSE	126.2604831	0.454614786	125.201	0.4508	99.64123077	0.358769234	0.809702	3608.336185	19.74905
OPT_ceq_sym_3_on_2_sym_7_mc_4_2B_2CF3_2B_2CF3	ceq	methane	methanol	0.997189	0.00281124	298	6.00E+06	TRUE	117.4079997	26.11372678	116.4228	25.8946	81.80503579	18.19496421	0.809702	3608.336185	19.74905
OPT_ceq_sym_3_on_2_sym_7_mc_4_2B_2CF3_2B_2CF3	ceq	methane	methanol	0.99789	0.00210991	298	8.00E+06	FALSE	153.1957033	0.319884228	151.9102	0.3172	99.79162753	0.208372474	0.809702	3608.336185	19.74905
OPT_ceq_sym_3_on_2_sym_7_mc_4_2B_2CF3_2B_2CF3	ceq	methane	methanol	0.99789	0.00210991	298	8.00E+06	TRUE	145.3789106	16.63075278	144.159	16.4912	89.73471555	10.26528445	0.809702	3608.336185	19.74905
OPT_ceq_sym_3_on_2_sym_7_mc_4_2B_2CF3_2B_2CF3	ceq	methane	methanol	0.998311	0.00168864	298	1.00E+07	FALSE	172.0299461	0.210768612	170.5864	0.209	99.87763136	0.122368635	0.809702	3608.336185	19.74905
OPT_ceq_sym_3_on_2_sym_7_mc_4_2B_2CF3_2B_2CF3	ceq	methane	methanol	0.998311	0.00168864	298	1.00E+07	TRUE	169.4835789	9.888779206	168.0614	9.8058	94.48701053	5.512989466	0.809702	3608.336185	19.74905
OPT_ceq_sym_3_on_2_sym_7_mc_4_2B_2CH3_2B_2CH3	ceq	methane	22-dimethylbutane	0.989153	0.0108468	298	4.00E+06	FALSE	84.177348	17.74743525	84.0956	17.7302	82.58771353	17.41228647	0.842491	6036.212686	21.24716
OPT_ceq_sym_3_on_2_sym_7_mc_4_2B_2CH3_2B_2CH3	ceq	methane	22-dimethylbutane	0.992743	0.00725744	298	6.00E+06	FALSE	116.8606881	11.03051217	116.7472	11.0198	91.3750812	8.624918797	0.842491	6036.212686	21.24716
OPT_ceq_sym_3_on_2_sym_7_mc_4_2B_2CH3_2B_2CH3	ceq	methane	22-dimethylbutane	0.994547	0.00545297	298	8.00E+06	FALSE	145.2102195	7.281471329	145.0692	7.2744	95.22500453	4.774995471	0.842491	6036.212686	21.24716
OPT_ceq_sym_3_on_2_sym_7_mc_4_2B_2CH3_2B_2CH3	ceq	methane	22-dimethylbutane	0.995633	0.00436714	298	1.00E+07	FALSE	166.6348258	4.853313247	166.473	4.8486	97.16988401	2.830115992	0.842491	6036.212686	21.24716
OPT_ceq_sym_3_on_2_sym_7_mc_4_2B_2CH3_2B_2CH3	ceq	methane	methanol	0.995789	0.00421093	298	4.00E+06	FALSE	83.95733434	0.508493819	83.8758	0.508	99.39798871	0.602011287	0.842491	6036.212686	21.24716
OPT_ceq_sym_3_on_2_sym_7_mc_4_2B_2CH3_2B_2CH3	ceq	methane	methanol	0.995789	0.00421093	298	4.00E+06	TRUE	81.08674659	19.79101985	81.008	19.7718	80.3811875	19.6188125	0.842491	6036.212686	21.24716
OPT_ceq_sym_3_on_2_sym_7_mc_4_2B_2CH3_2B_2CH3	ceq	methane	methanol	0.997189	0.00281124	298	6.00E+06	FALSE	117.7865873	0.40159	117.6722	0.4012	99.66021136	0.33978864	0.842491	6036.212686	21.24716
OPT_ceq_sym_3_on_2_sym_7_mc_4_2B_2CH3_2B_2CH3	ceq	methane	methanol	0.997189	0.00281124	298	6.00E+06	TRUE	114.037146	12.48232208	113.9264	12.4702	90.13407006	9.865929938	0.842491	6036.212686	21.24716
OPT_ceq_sym_3_on_2_sym_7_mc_4_2B_2CH3_2B_2CH3	ceq	methane	methanol	0.99789	0.00210991	298	8.00E+06	FALSE	145.8304218	0.410598749	145.6888	0.4102	99.71923148	0.28076852	0.842491	6036.212686	21.24716
OPT_ceq_sym_3_on_2_sym_7_mc_4_2B_2CH3_2B_2CH3	ceq	methane	methanol	0.99789	0.00210991	298	8.00E+06	TRUE	140.9174506	12.36901204	140.7806	12.357	91.93078643	8.06921357	0.842491	6036.212686	21.24716
OPT_ceq_sym_3_on_2_sym_7_mc_4_2B_2CH3_2B_2CH3	ceq	methane	methanol	0.998311	0.00168864	298	1.00E+07	FALSE	168.7304609	0.189383918	168.5666	0.1892	99.88788533	0.112114665	0.842491	6036.212686	21.24716
OPT_ceq_sym_3_on_2_sym_7_mc_4_2B_2CH3_2B_2CH3	ceq	methane	methanol	0.998311	0.00168864	298	1.00E+07	TRUE	166.1055117	10.36206302	165.9442	10.352	94.12806402	5.87193598	0.842491	6036.212686	21.24716
OPT_ceq_sym_3_on_2_sym_7_mc_4_2B_2CN_2B_2CN	ceq	methane	22-dimethylbutane	0.989153	0.0108468	298	4.00E+06	FALSE	86.75110761	25.70214033	87.988	26.0686	77.14415474	22.85584526	0.859557	5597.395806	21.11423
OPT_ceq_sym_3_on_2_sym_7_mc_4_2B_2CN_2B_2CN	ceq	methane	22-dimethylbutane	0.992743	0.00725744	298	6.00E+06	FALSE	120.8229137	14.5185947	122.5456	14.7256	89.27262237	10.72737763	0.859557	5597.395806	21.11423
OPT_ceq_sym_3_on_2_sym_7_mc_4_2B_2CN_2B_2CN	ceq	methane	22-dimethylbutane	0.994547	0.00545297	298	8.00E+06	FALSE	147.992728	9.524993185	150.1028	9.6608	93.95306565	6.046934345	0.859557	5597.395806	21.11423
OPT_ceq_sym_3_on_2_sym_7_mc_4_2B_2CN_2B_2CN	ceq	methane	22-dimethylbutane	0.995633	0.00436714	298	1.00E+07	FALSE	172.1518684	6.318313838	174.6064	6.4084	96.45973699	3.540263006	0.859557	5597.395806	21.11423
OPT_ceq_sym_3_on_2_sym_7_mc_4_2B_2CN_2B_2CN	ceq	methane	methanol	0.995789	0.00421093	298	4.00E+06	FALSE	89.8266566	2.202003952	91.1074	2.2334	97.60726285	2.392737152	0.859557	5597.395806	21.11423
OPT_ceq_sym_3_on_2_sym_7_mc_4_2B_2CN_2B_2CN	ceq	methane	methanol	0.995789	0.00421093	298	4.00E+06	TRUE	74.35899367	102.8744223	75.4192	104.3412	41.95540286	58.04459714	0.859557	5597.395806	21.11423
OPT_ceq_sym_3_on_2_sym_7_mc_4_2B_2CN_2B_2CN	ceq	methane	methanol	0.997189	0.00281124	298	6.00E+06	FALSE	122.6563724	0.421983385	124.4052	0.428	99.65714249	0.342857509	0.859557	5597.395806	21.11423
OPT_ceq_sym_3_on_2_sym_7_mc_4_2B_2CN_2B_2CN	ceq	methane	methanol	0.997189	0.00281124	298	6.00E+06	TRUE	108.9584762	74.29372427	110.512	75.353	59.45820892	40.54179108	0.859557	5597.395806	21.11423
OPT_ceq_sym_3_on_2_sym_7_mc_4_2B_2CN_2B_2CN	ceq	methane	methanol	0.99789	0.00210991	298	8.00E+06	FALSE	151.4729078	0.301698401	153.6326	0.306	99.80121945	0.198780553	0.859557	5597.395806	21.11423
OPT_ceq_sym_3_on_2_sym_7_mc_4_2B_2CN_2B_2CN	ceq	methane	methanol	0.99789	0.00210991	298	8.00E+06	TRUE	135.2393648	60.12750542	137.1676	60.9848	69.2232847	30.7767153	0.859557	5597.395806	21.11423
OPT_ceq_sym_3_on_2_sym_7_mc_4_2B_2CN_2B_2CN	ceq	methane	methanol	0.998311	0.00168864	298	1.00E+07	FALSE	174.9637764	0.21394952	177.4584	0.217	99.87786717	0.122132833	0.859557	5597.395806	21.11423
OPT_ceq_sym_3_on_2_sym_7_mc_4_2B_2CN_2B_2CN	ceq	methane	methanol	0.998311	0.00168864	298	1.00E+07	TRUE	160.1555118	47.13909347	162.439	47.8112	77.25985516	22.74014484	0.859557	5597.395806	21.11423
OPT_ceq_sym_3_on_2_sym_7_mc_4_2B_2F_2B_2F	ceq	methane	22-dimethylbutane	0.989153	0.0108468	298	4.00E+06	FALSE	87.04015439	20.72244168	88.5252	21.076	80.77028354	19.22971646	0.897524	5570.36703	21.97
OPT_ceq_sym_3_on_2_sym_7_mc_4_2B_2F_2B_2F	ceq	methane	22-dimethylbutane	0.992743	0.00725744	298	6.00E+06	FALSE	121.5652996	12.34831776	123.6394	12.559	90.77889314	9.221106856	0.897524	5570.36703	21.97
OPT_ceq_sym_3_on_2_sym_7_mc_4_2B_2F_2B_2F	ceq	methane	22-dimethylbutane	0.994547	0.00545297	298	8.00E+06	FALSE	151.628375	7.764328024	154.2154	7.8968	95.12880585	4.871194148	0.897524	5570.36703	21.97
OPT_ceq_sym_3_on_2_sym_7_mc_4_2B_2F_2B_2F	ceq	methane	22-dimethylbutane	0.995633	0.00436714	298	1.00E+07	FALSE	174.5756573	5.752847136	177.5542	5.851	96.80979601	3.190203985	0.897524	5570.36703	21.97
OPT_ceq_sym_3_on_2_sym_7_mc_4_2B_2F_2B_2F	ceq	methane	methanol	0.995789	0.00421093	298	4.00E+06	FALSE	86.66633239	4.681525612	88.145	4.7614	94.87505705	5.124942953	0.897524	5570.36703	21.97
OPT_ceq_sym_3_on_2_sym_7_mc_4_2B_2F_2B_2F	ceq	methane	methanol	0.995789	0.00421093	298	4.00E+06	TRUE	84.91068655	28.92784426	86.3594	29.4214	74.58870555	25.41129445	0.897524	5570.36703	21.97
OPT_ceq_sym_3_on_2_sym_7_mc_4_2B_2F_2B_2F	ceq	methane	methanol	0.997189	0.00281124	298	6.00E+06	FALSE	122.6942381	0.440681266	124.7876	0.4482	99.64211511	0.357884886	0.897524	5570.36703	21.97
OPT_ceq_sym_3_on_2_sym_7_mc_4_2B_2F_2B_2F	ceq	methane	methanol	0.997189	0.00281124	298	6.00E+06	TRUE	119.1105811	21.91981259	121.1428	22.2938	84.45738396	15.54261604	0.897524	5570.36703	21.97
OPT_ceq_sym_3_on_2_sym_7_mc_4_2B_2F_2B_2F	ceq	methane	methanol	0.99789	0.00210991	298	8.00E+06	FALSE	150.7238084	0.32092451	153.2954	0.3264	99.78753016	0.212469845	0.897524	5570.36703	21.97
OPT_ceq_sym_3_on_2_sym_7_mc_4_2B_2F_2B_2F	ceq	methane	methanol	0.99789	0.00210991	298	8.00E+06	TRUE	146.4955493	17.99949947	148.995	18.3066	89.05772569	10.94227431	0.897524	5570.36703	21.97
OPT_ceq_sym_3_on_2_sym_7_mc_4_2B_2F_2B_2F	ceq	methane	methanol	0.998311	0.00168864	298	1.00E+07	FALSE	176.7259695	0.207460391	179.7412	0.211	99.88274664	0.11725336	0.897524	5570.36703	21.97
OPT_ceq_sym_3_on_2_sym_7_mc_4_2B_2F_2B_2F	ceq	methane	methanol	0.998311	0.00168864	298	1.00E+07	TRUE	175.2281252	10.09476697	178.2178	10.267	94.55287641	5.447123588	0.897524	5570.36703	21.97
OPT_ceq_sym_3_on_2_sym_7_mc_4_2B_2NH2_2B_2NH2	ceq	methane	22-dimethylbutane	0.989153	0.0108468	298	4.00E+06	FALSE	87.70811057	27.97076927	88.1748	28.1196	75.82033185	24.17966815	0.869432	6049.519524	20.55269
OPT_ceq_sym_3_on_2_sym_7_mc_4_2B_2NH2_2B_2NH2	ceq	methane	22-dimethylbutane	0.992743	0.00725744	298	6.00E+06	FALSE	122.9265156	13.88372556	123.5806	13.9576	89.85183753	10.14816247	0.869432	6049.519524	20.55269
OPT_ceq_sym_3_on_2_sym_7_mc_4_2B_2NH2_2B_2NH2	ceq	methane	22-dimethylbutane	0.994547	0.00545297	298	8.00E+06	FALSE	150.6177722	8.389559672	151.4192	8.4342	94.72379067	5.276209327	0.869432	6049.519524	20.55269
OPT_ceq_sym_3_on_2_sym_7_mc_4_2B_2NH2_2B_2NH2	ceq	methane	22-dimethylbutane	0.995633	0.00436714	298	1.00E+07	FALSE	174.8573946	5.318102705	175.7878	5.3464	97.04837629	2.951623713	0.869432	6049.519524	20.55269
OPT_ceq_sym_3_on_2_sym_7_mc_4_2B_2NH2_2B_2NH2	ceq	methane	methanol	0.995789	0.00421093	298	4.00E+06	FALSE	89.42417947	0.704451656	89.9	0.7082	99.21839304	0.781606963	0.869432	6049.519524	20.55269
OPT_ceq_sym_3_on_2_sym_7_mc_4_2B_2NH2_2B_2NH2	ceq	methane	methanol	0.995789	0.00421093	298	4.00E+06	TRUE	83.17861175	33.85525827	83.6212	34.0354	71.07225604	28.92774396	0.869432	6049.519524	20.55269
OPT_ceq_sym_3_on_2_sym_7_mc_4_2B_2NH2_2B_2NH2	ceq	methane	methanol	0.997189	0.00281124	298	6.00E+06	FALSE	123.3114673	0.419368566	123.9676	0.4216	99.66106382	0.338936178	0.869432	6049.519524	20.55269
OPT_ceq_sym_3_on_2_sym_7_mc_4_2B_2NH2_2B_2NH2	ceq	methane	methanol	0.997189	0.00281124	298	6.00E+06	TRUE	119.6298569	20.53075711	120.2664	20.64	85.35197833	14.64802167	0.869432	6049.519524	20.55269
OPT_ceq_sym_3_on_2_sym_7_mc_4_2B_2NH2_2B_2NH2	ceq	methane	methanol	0.99789	0.00210991	298	8.00E+06	FALSE	154.189169	0.31810737	155.0096	0.3198	99.79411496	0.205885042	0.869432	6049.519524	20.55269
OPT_ceq_sym_3_on_2_sym_7_mc_4_2B_2NH2_2B_2NH2	ceq	methane	methanol	0.99789	0.00210991	298	8.00E+06	TRUE	147.5355723	13.3338514	148.3206	13.4048	91.71138238	8.28861762	0.869432	6049.519524	20.55269
OPT_ceq_sym_3_on_2_sym_7_mc_4_2B_2NH2_2B_2NH2	ceq	methane	methanol	0.998311	0.00168864	298	1.00E+07	FALSE	177.5464861	0.25882282	178.4912	0.2602	99.85443471	0.145565293	0.869432	6049.519524	20.55269
OPT_ceq_sym_3_on_2_sym_7_mc_4_2B_2NH2_2B_2NH2	ceq	methane	methanol	0.998311	0.00168864	298	1.00E+07	TRUE	171.0689527	12.37594834	171.9792	12.4418	93.25358826	6.746411743	0.869432	6049.519524	20.55269
OPT_ceq_sym_3_on_2_sym_7_mc_4_2B_2NO2_2B_2NO2	ceq	methane	22-dimethylbutane	0.989153	0.0108468	298	4.00E+06	FALSE	82.19204755	46.28975857	82.0554	46.2128	63.97174046	36.02825954	0.839799	4454.498047	19.53765
OPT_ceq_sym_3_on_2_sym_7_mc_4_2B_2NO2_2B_2NO2	ceq	methane	22-dimethylbutane	0.992743	0.00725744	298	6.00E+06	FALSE	120.1767987	20.1346747	119.977	20.1012	85.65001549	14.34998451	0.839799	4454.498047	19.53765
OPT_ceq_sym_3_on_2_sym_7_mc_4_2B_2NO2_2B_2NO2	ceq	methane	22-dimethylbutane	0.994547	0.00545297	298	8.00E+06	FALSE	149.5231883	12.58452227	149.2746	12.5636	92.23693788	7.76306212	0.839799	4454.498047	19.53765
OPT_ceq_sym_3_on_2_sym_7_mc_4_2B_2NO2_2B_2NO2	ceq	methane	22-dimethylbutane	0.995633	0.00436714	298	1.00E+07	FALSE	172.4539115	7.40170563	172.1672	7.3894	95.88464027	4.115359725	0.839799	4454.498047	19.53765
OPT_ceq_sym_3_on_2_sym_7_mc_4_2B_2NO2_2B_2NO2	ceq	methane	methanol	0.995789	0.00421093	298	4.00E+06	FALSE	92.5332402	0.651483117	92.3794	0.6504	99.30086918	0.699130816	0.839799	4454.498047	19.53765
OPT_ceq_sym_3_on_2_sym_7_mc_4_2B_2NO2_2B_2NO2	ceq	methane	methanol	0.995789	0.00421093	298	4.00E+06	TRUE	73.2856403	121.0875128	73.1638	120.8862	37.70358155	62.29641845	0.839799	4454.498047	19.53765
OPT_ceq_sym_3_on_2_sym_7_mc_4_2B_2NO2_2B_2NO2	ceq	methane	methanol	0.997189	0.00281124	298	6.00E+06	FALSE	128.2201711	0.519263296	128.007	0.5184	99.5966556	0.403344397	0.839799	4454.498047	19.53765
OPT_ceq_sym_3_on_2_sym_7_mc_4_2B_2NO2_2B_2NO2	ceq	methane	methanol	0.997189	0.00281124	298	6.00E+06	TRUE	104.7727889	91.47668363	104.5986	91.3246	53.38755186	46.61244814	0.839799	4454.498047	19.53765
OPT_ceq_sym_3_on_2_sym_7_mc_4_2B_2NO2_2B_2NO2	ceq	methane	methanol	0.99789	0.00210991	298	8.00E+06	FALSE	154.0983947	0.31011558	153.8422	0.3096	99.79915901	0.200840989	0.839799	4454.498047	19.53765
OPT_ceq_sym_3_on_2_sym_7_mc_4_2B_2NO2_2B_2NO2	ceq	methane	methanol	0.99789	0.00210991	298	8.00E+06	TRUE	129.771951	79.12855437	129.5562	78.997	62.12141554	37.87858446	0.839799	4454.498047	19.53765
OPT_ceq_sym_3_on_2_sym_7_mc_4_2B_2NO2_2B_2NO2	ceq	methane	methanol	0.998311	0.00168864	298	1.00E+07	FALSE	177.1028405	0.224773695	176.8084	0.2244	99.87324383	0.126756172	0.839799	4454.498047	19.53765
OPT_ceq_sym_3_on_2_sym_7_mc_4_2B_2NO2_2B_2NO2	ceq	methane	methanol	0.998311	0.00168864	298	1.00E+07	TRUE	153.2519875	64.84781207	152.9972	64.74	70.26690892	29.73309108	0.839799	4454.498047	19.53765
OPT_ceq_sym_3_on_2_sym_7_mc_4_2B_2OH_2B_2OH	ceq	methane	22-dimethylbutane	0.989153	0.0108468	298	4.00E+06	FALSE	86.89697567	25.89894356	87.9648	26.2172	77.039113	22.960887	0.882322	5865.862281	22.1208
OPT_ceq_sym_3_on_2_sym_7_mc_4_2B_2OH_2B_2OH	ceq	methane	22-dimethylbutane	0.992743	0.00725744	298	6.00E+06	FALSE	120.3449537	14.05725886	121.8238	14.23	89.5409022	10.4590978	0.882322	5865.862281	22.1208
OPT_ceq_sym_3_on_2_sym_7_mc_4_2B_2OH_2B_2OH	ceq	methane	22-dimethylbutane	0.994547	0.00545297	298	8.00E+06	FALSE	149.3313574	8.988150065	151.1664	9.0986	94.3227779	5.677222101	0.882322	5865.862281	22.1208
OPT_ceq_sym_3_on_2_sym_7_mc_4_2B_2OH_2B_2OH	ceq	methane	22-dimethylbutane	0.995633	0.00436714	298	1.00E+07	FALSE	173.8931326	5.92420108	176.03	5.997	96.70543381	3.294566191	0.882322	5865.862281	22.1208
OPT_ceq_sym_3_on_2_sym_7_mc_4_2B_2OH_2B_2OH	ceq	methane	methanol	0.995789	0.00421093	298	4.00E+06	FALSE	88.12547934	0.499264837	89.2084	0.5054	99.436653	0.563346999	0.882322	5865.862281	22.1208
OPT_ceq_sym_3_on_2_sym_7_mc_4_2B_2OH_2B_2OH	ceq	methane	methanol	0.995789	0.00421093	298	4.00E+06	TRUE	76.00541546	117.8124738	76.9394	119.2602	39.21486078	60.78513922	0.882322	5865.862281	22.1208
OPT_ceq_sym_3_on_2_sym_7_mc_4_2B_2OH_2B_2OH	ceq	methane	methanol	0.997189	0.00281124	298	6.00E+06	FALSE	122.5140984	0.374991951	124.0196	0.3796	99.69485334	0.305146657	0.882322	5865.862281	22.1208
OPT_ceq_sym_3_on_2_sym_7_mc_4_2B_2OH_2B_2OH	ceq	methane	methanol	0.997189	0.00281124	298	6.00E+06	TRUE	108.1312406	86.53699921	109.46	87.6004	55.5464213	44.4535787	0.882322	5865.862281	22.1208
OPT_ceq_sym_3_on_2_sym_7_mc_4_2B_2OH_2B_2OH	ceq	methane	methanol	0.99789	0.00210991	298	8.00E+06	FALSE	151.4131752	0.276601018	153.2738	0.28	99.81765349	0.182346513	0.882322	5865.862281	22.1208
OPT_ceq_sym_3_on_2_sym_7_mc_4_2B_2OH_2B_2OH	ceq	methane	methanol	0.99789	0.00210991	298	8.00E+06	TRUE	135.4295878	79.98965555	137.0938	80.9726	62.86791546	37.13208454	0.882322	5865.862281	22.1208
OPT_ceq_sym_3_on_2_sym_7_mc_4_2B_2OH_2B_2OH	ceq	methane	methanol	0.998311	0.00168864	298	1.00E+07	FALSE	175.8652978	0.235110865	178.0264	0.238	99.86649045	0.133509551	0.882322	5865.862281	22.1208
OPT_ceq_sym_3_on_2_sym_7_mc_4_2B_2OH_2B_2OH	ceq	methane	methanol	0.998311	0.00168864	298	1.00E+07	TRUE	160.5581975	55.92042772	162.5312	56.6076	74.16815279	25.83184721	0.882322	5865.862281	22.1208
OPT_ceq_sym_3_on_2_sym_7_mc_4_2B_2SH_2B_2SH	ceq	methane	22-dimethylbutane	0.989153	0.0108468	298	4.00E+06	FALSE	87.33180477	49.25288204	87.4306	49.3086	63.93967494	36.06032506	0.861963	4909.592444	21.21311
OPT_ceq_sym_3_on_2_sym_7_mc_4_2B_2SH_2B_2SH	ceq	methane	22-dimethylbutane	0.992743	0.00725744	298	6.00E+06	FALSE	127.5411175	23.15540515	127.6854	23.1816	84.63441309	15.36558691	0.861963	4909.592444	21.21311
OPT_ceq_sym_3_on_2_sym_7_mc_4_2B_2SH_2B_2SH	ceq	methane	22-dimethylbutane	0.994547	0.00545297	298	8.00E+06	FALSE	157.786502	13.25620375	157.965	13.2712	92.24976962	7.750230384	0.861963	4909.592444	21.21311
OPT_ceq_sym_3_on_2_sym_7_mc_4_2B_2SH_2B_2SH	ceq	methane	22-dimethylbutane	0.995633	0.00436714	298	1.00E+07	FALSE	182.6252029	8.504778859	182.8318	8.5144	95.55026439	4.44973561	0.861963	4909.592444	21.21311
OPT_ceq_sym_3_on_2_sym_7_mc_4_2B_2SH_2B_2SH	ceq	methane	methanol	0.995789	0.00421093	298	4.00E+06	FALSE	98.18632545	2.381905439	98.2974	2.3846	97.63155281	2.36844719	0.861963	4909.592444	21.21311
OPT_ceq_sym_3_on_2_sym_7_mc_4_2B_2SH_2B_2SH	ceq	methane	methanol	0.995789	0.00421093	298	4.00E+06	TRUE	88.40559004	48.84714104	88.5056	48.9024	64.41080578	35.58919422	0.861963	4909.592444	21.21311
OPT_ceq_sym_3_on_2_sym_7_mc_4_2B_2SH_2B_2SH	ceq	methane	methanol	0.997189	0.00281124	298	6.00E+06	FALSE	133.6290304	0.511421448	133.7802	0.512	99.61874182	0.381258182	0.861963	4909.592444	21.21311
OPT_ceq_sym_3_on_2_sym_7_mc_4_2B_2SH_2B_2SH	ceq	methane	methanol	0.997189	0.00281124	298	6.00E+06	TRUE	125.623287	24.51047221	125.7654	24.5382	83.67424333	16.32575667	0.861963	4909.592444	21.21311
OPT_ceq_sym_3_on_2_sym_7_mc_4_2B_2SH_2B_2SH	ceq	methane	methanol	0.99789	0.00210991	298	8.00E+06	FALSE	161.3870288	0.352001793	161.5696	0.3524	99.78236435	0.217635652	0.861963	4909.592444	21.21311
OPT_ceq_sym_3_on_2_sym_7_mc_4_2B_2SH_2B_2SH	ceq	methane	methanol	0.99789	0.00210991	298	8.00E+06	TRUE	154.5118065	23.03673939	154.6866	23.0628	87.02510388	12.97489612	0.861963	4909.592444	21.21311
OPT_ceq_sym_3_on_2_sym_7_mc_4_2B_2SH_2B_2SH	ceq	methane	methanol	0.998311	0.00168864	298	1.00E+07	FALSE	185.9384547	0.23853016	186.1488	0.2388	99.87187989	0.128120111	0.861963	4909.592444	21.21311
OPT_ceq_sym_3_on_2_sym_7_mc_4_2B_2SH_2B_2SH	ceq	methane	methanol	0.998311	0.00168864	298	1.00E+07	TRUE	173.7692213	21.87685153	173.9658	21.9016	88.81814942	11.18185058	0.861963	4909.592444	21.21311
OPT_ceq_sym_3_on_2_sym_7_mc_4_2B_4Br_2B_4Br	ceq	methane	22-dimethylbutane	0.989153	0.0108468	298	4.00E+06	FALSE	75.09620921	70.94375206	72.4548	68.4484	51.42168524	48.57831476	0.831544	2031.629359	20.97581
OPT_ceq_sym_3_on_2_sym_7_mc_4_2B_4Br_2B_4Br	ceq	methane	22-dimethylbutane	0.992743	0.00725744	298	6.00E+06	FALSE	119.2469529	40.23770782	115.0526	38.8224	74.77017059	25.22982941	0.831544	2031.629359	20.97581
OPT_ceq_sym_3_on_2_sym_7_mc_4_2B_4Br_2B_4Br	ceq	methane	22-dimethylbutane	0.994547	0.00545297	298	8.00E+06	FALSE	155.2275215	22.32007908	149.7676	21.535	87.42867884	12.57132116	0.831544	2031.629359	20.97581
OPT_ceq_sym_3_on_2_sym_7_mc_4_2B_4Br_2B_4Br	ceq	methane	22-dimethylbutane	0.995633	0.00436714	298	1.00E+07	FALSE	180.0692979	13.96790238	173.7356	13.4766	92.80143068	7.198569324	0.831544	2031.629359	20.97581
OPT_ceq_sym_3_on_2_sym_7_mc_4_2B_4Br_2B_4Br	ceq	methane	methanol	0.995789	0.00421093	298	4.00E+06	FALSE	107.5072235	6.883518606	103.7258	6.6414	93.98245131	6.017548692	0.831544	2031.629359	20.97581
OPT_ceq_sym_3_on_2_sym_7_mc_4_2B_4Br_2B_4Br	ceq	methane	methanol	0.995789	0.00421093	298	4.00E+06	TRUE	101.4501749	30.54829564	97.8818	29.4738	76.85708363	23.14291637	0.831544	2031.629359	20.97581
OPT_ceq_sym_3_on_2_sym_7_mc_4_2B_4Br_2B_4Br	ceq	methane	methanol	0.997189	0.00281124	298	6.00E+06	FALSE	145.885322	1.300544937	140.754	1.2548	99.11639279	0.883607213	0.831544	2031.629359	20.97581
OPT_ceq_sym_3_on_2_sym_7_mc_4_2B_4Br_2B_4Br	ceq	methane	methanol	0.997189	0.00281124	298	6.00E+06	TRUE	138.2356552	15.96453114	133.3734	15.403	89.64687948	10.35312052	0.831544	2031.629359	20.97581
OPT_ceq_sym_3_on_2_sym_7_mc_4_2B_4Br_2B_4Br	ceq	methane	methanol	0.99789	0.00210991	298	8.00E+06	FALSE	172.0533475	0.444846898	166.0016	0.4292	99.74211504	0.257884959	0.831544	2031.629359	20.97581
OPT_ceq_sym_3_on_2_sym_7_mc_4_2B_4Br_2B_4Br	ceq	methane	methanol	0.99789	0.00210991	298	8.00E+06	TRUE	166.3192586	11.38401767	160.4692	10.9836	93.59380541	6.406194591	0.831544	2031.629359	20.97581
OPT_ceq_sym_3_on_2_sym_7_mc_4_2B_4Br_2B_4Br	ceq	methane	methanol	0.998311	0.00168864	298	1.00E+07	FALSE	192.554861	0.288963921	185.782	0.2788	99.85015651	0.149843492	0.831544	2031.629359	20.97581
OPT_ceq_sym_3_on_2_sym_7_mc_4_2B_4Br_2B_4Br	ceq	methane	methanol	0.998311	0.00168864	298	1.00E+07	TRUE	187.8866633	10.8255752	181.278	10.4448	94.55213464	5.447865356	0.831544	2031.629359	20.97581
OPT_ceq_sym_3_on_2_sym_7_mc_4_2B_4CN_2B_4CN	ceq	methane	22-dimethylbutane	0.989153	0.0108468	298	4.00E+06	FALSE	83.23776289	24.48357599	84.338	24.8072	77.27137794	22.72862206	0.805771	4267.144506	20.60819
OPT_ceq_sym_3_on_2_sym_7_mc_4_2B_4CN_2B_4CN	ceq	methane	22-dimethylbutane	0.992743	0.00725744	298	6.00E+06	FALSE	115.9377345	13.82624464	117.4702	14.009	89.34508272	10.65491728	0.805771	4267.144506	20.60819
OPT_ceq_sym_3_on_2_sym_7_mc_4_2B_4CN_2B_4CN	ceq	methane	22-dimethylbutane	0.994547	0.00545297	298	8.00E+06	FALSE	142.9560069	8.400758735	144.8456	8.5118	94.44969724	5.550302757	0.805771	4267.144506	20.60819
OPT_ceq_sym_3_on_2_sym_7_mc_4_2B_4CN_2B_4CN	ceq	methane	22-dimethylbutane	0.995633	0.00436714	298	1.00E+07	FALSE	164.373905	5.160587335	166.5466	5.2288	96.95602514	3.043974865	0.805771	4267.144506	20.60819
OPT_ceq_sym_3_on_2_sym_7_mc_4_2B_4CN_2B_4CN	ceq	methane	methanol	0.995789	0.00421093	298	4.00E+06	FALSE	88.97828465	0.581908333	90.1544	0.5896	99.35026007	0.649739928	0.805771	4267.144506	20.60819
OPT_ceq_sym_3_on_2_sym_7_mc_4_2B_4CN_2B_4CN	ceq	methane	methanol	0.995789	0.00421093	298	4.00E+06	TRUE	69.19577002	107.0057969	70.1104	108.4202	39.27080288	60.72919712	0.805771	4267.144506	20.60819
OPT_ceq_sym_3_on_2_sym_7_mc_4_2B_4CN_2B_4CN	ceq	methane	methanol	0.997189	0.00281124	298	6.00E+06	FALSE	120.2076942	0.451038176	121.7966	0.457	99.62618688	0.373813123	0.805771	4267.144506	20.60819
OPT_ceq_sym_3_on_2_sym_7_mc_4_2B_4CN_2B_4CN	ceq	methane	methanol	0.997189	0.00281124	298	6.00E+06	TRUE	98.81683861	87.82137667	100.123	88.9822	52.94566199	47.05433801	0.805771	4267.144506	20.60819
OPT_ceq_sym_3_on_2_sym_7_mc_4_2B_4CN_2B_4CN	ceq	methane	methanol	0.99789	0.00210991	298	8.00E+06	FALSE	147.2265587	0.28937504	149.1726	0.2932	99.80383472	0.196165277	0.805771	4267.144506	20.60819
OPT_ceq_sym_3_on_2_sym_7_mc_4_2B_4CN_2B_4CN	ceq	methane	methanol	0.99789	0.00210991	298	8.00E+06	TRUE	125.5254047	65.11609518	127.1846	65.9768	65.84369341	34.15630659	0.805771	4267.144506	20.60819
OPT_ceq_sym_3_on_2_sym_7_mc_4_2B_4CN_2B_4CN	ceq	methane	methanol	0.998311	0.00168864	298	1.00E+07	FALSE	167.6442772	0.201733486	169.8602	0.2044	99.87981038	0.120189622	0.805771	4267.144506	20.60819
OPT_ceq_sym_3_on_2_sym_7_mc_4_2B_4CN_2B_4CN	ceq	methane	methanol	0.998311	0.00168864	298	1.00E+07	TRUE	146.0094465	61.89842634	147.9394	62.7166	70.22795458	29.77204542	0.805771	4267.144506	20.60819
OPT_ceq_sym_3_on_2_sym_7_mc_4_2B_4F_2B_4F	ceq	methane	22-dimethylbutane	0.989153	0.0108468	298	4.00E+06	FALSE	87.06417273	18.76106747	88.289	19.025	82.27165142	17.72834858	0.880972	4638.299235	21.904
OPT_ceq_sym_3_on_2_sym_7_mc_4_2B_4F_2B_4F	ceq	methane	22-dimethylbutane	0.992743	0.00725744	298	6.00E+06	FALSE	120.4163708	11.16236674	122.1104	11.3194	91.51658775	8.483412251	0.880972	4638.299235	21.904
OPT_ceq_sym_3_on_2_sym_7_mc_4_2B_4F_2B_4F	ceq	methane	22-dimethylbutane	0.994547	0.00545297	298	8.00E+06	FALSE	148.8292555	7.412322722	150.923	7.5166	95.25585775	4.744142247	0.880972	4638.299235	21.904
OPT_ceq_sym_3_on_2_sym_7_mc_4_2B_4F_2B_4F	ceq	methane	22-dimethylbutane	0.995633	0.00436714	298	1.00E+07	FALSE	173.9650428	5.103602029	176.4124	5.1754	97.14991866	2.850081338	0.880972	4638.299235	21.904
OPT_ceq_sym_3_on_2_sym_7_mc_4_2B_4F_2B_4F	ceq	methane	methanol	0.995789	0.00421093	298	4.00E+06	FALSE	87.50615488	0.842349742	88.7372	0.8542	99.04656027	0.953439727	0.880972	4638.299235	21.904
OPT_ceq_sym_3_on_2_sym_7_mc_4_2B_4F_2B_4F	ceq	methane	methanol	0.995789	0.00421093	298	4.00E+06	TRUE	82.16568513	34.77853222	83.3216	35.2678	70.26057978	29.73942022	0.880972	4638.299235	21.904
OPT_ceq_sym_3_on_2_sym_7_mc_4_2B_4F_2B_4F	ceq	methane	methanol	0.997189	0.00281124	298	6.00E+06	FALSE	123.2165772	0.39819811	124.95	0.4038	99.67787175	0.322128248	0.880972	4638.299235	21.904
OPT_ceq_sym_3_on_2_sym_7_mc_4_2B_4F_2B_4F	ceq	methane	methanol	0.997189	0.00281124	298	6.00E+06	TRUE	115.3234189	25.4136779	116.9458	25.7712	81.94244554	18.05755446	0.880972	4638.299235	21.904
OPT_ceq_sym_3_on_2_sym_7_mc_4_2B_4F_2B_4F	ceq	methane	methanol	0.99789	0.00210991	298	8.00E+06	FALSE	151.3348072	0.303529912	153.4638	0.3078	99.799833	0.200167001	0.880972	4638.299235	21.904
OPT_ceq_sym_3_on_2_sym_7_mc_4_2B_4F_2B_4F	ceq	methane	methanol	0.99789	0.00210991	298	8.00E+06	TRUE	145.3186432	21.64706695	147.363	21.9516	87.03502238	12.96497762	0.880972	4638.299235	21.904
OPT_ceq_sym_3_on_2_sym_7_mc_4_2B_4F_2B_4F	ceq	methane	methanol	0.998311	0.00168864	298	1.00E+07	FALSE	176.5697989	0.206495008	179.0538	0.2094	99.88318852	0.116811482	0.880972	4638.299235	21.904
OPT_ceq_sym_3_on_2_sym_7_mc_4_2B_4F_2B_4F	ceq	methane	methanol	0.998311	0.00168864	298	1.00E+07	TRUE	170.1684536	18.04158917	172.5624	18.2954	90.41411983	9.585880168	0.880972	4638.299235	21.904
OPT_ceq_sym_3_on_2_sym_7_mc_4_2B_4H_2B_4H	ceq	methane	22-dimethylbutane	0.989153	0.0108468	298	4.00E+06	FALSE	85.61196251	18.39205879	87.5872	18.8164	82.31601186	17.68398814	0.912306	6853.290598	22.55841
OPT_ceq_sym_3_on_2_sym_7_mc_4_2B_4H_2B_4H	ceq	methane	22-dimethylbutane	0.992743	0.00725744	298	6.00E+06	FALSE	119.4674494	11.30594936	122.2238	11.5668	91.35454957	8.645450428	0.912306	6853.290598	22.55841
OPT_ceq_sym_3_on_2_sym_7_mc_4_2B_4H_2B_4H	ceq	methane	22-dimethylbutane	0.994547	0.00545297	298	8.00E+06	FALSE	148.6524927	7.414923044	152.0822	7.586	95.2488974	4.751102599	0.912306	6853.290598	22.55841
OPT_ceq_sym_3_on_2_sym_7_mc_4_2B_4H_2B_4H	ceq	methane	22-dimethylbutane	0.995633	0.00436714	298	1.00E+07	FALSE	174.6490995	4.842474525	178.6786	4.9542	97.30211596	2.697884038	0.912306	6853.290598	22.55841
OPT_ceq_sym_3_on_2_sym_7_mc_4_2B_4H_2B_4H	ceq	methane	methanol	0.995789	0.00421093	298	4.00E+06	FALSE	86.07449106	0.623221056	88.0604	0.6376	99.28115628	0.718843717	0.912306	6853.290598	22.55841
OPT_ceq_sym_3_on_2_sym_7_mc_4_2B_4H_2B_4H	ceq	methane	methanol	0.995789	0.00421093	298	4.00E+06	TRUE	85.13066695	12.287112	87.0948	12.5706	87.38719756	12.61280244	0.912306	6853.290598	22.55841
OPT_ceq_sym_3_on_2_sym_7_mc_4_2B_4H_2B_4H	ceq	methane	methanol	0.997189	0.00281124	298	6.00E+06	FALSE	120.0306551	1.40009699	122.8	1.4324	98.84699966	1.153000345	0.912306	6853.290598	22.55841
OPT_ceq_sym_3_on_2_sym_7_mc_4_2B_4H_2B_4H	ceq	methane	methanol	0.997189	0.00281124	298	6.00E+06	TRUE	119.5251188	11.31552836	122.2828	11.5766	91.35167198	8.648328022	0.912306	6853.290598	22.55841
OPT_ceq_sym_3_on_2_sym_7_mc_4_2B_4H_2B_4H	ceq	methane	methanol	0.99789	0.00210991	298	8.00E+06	FALSE	149.1924351	0.269189271	152.6346	0.2754	99.81989406	0.180105945	0.912306	6853.290598	22.55841
OPT_ceq_sym_3_on_2_sym_7_mc_4_2B_4H_2B_4H	ceq	methane	methanol	0.99789	0.00210991	298	8.00E+06	TRUE	148.1846859	11.05142182	151.6036	11.3064	93.05972623	6.940273771	0.912306	6853.290598	22.55841
OPT_ceq_sym_3_on_2_sym_7_mc_4_2B_4H_2B_4H	ceq	methane	methanol	0.998311	0.00168864	298	1.00E+07	FALSE	175.7702327	0.193925749	179.8256	0.1984	99.88979247	0.110207528	0.912306	6853.290598	22.55841
OPT_ceq_sym_3_on_2_sym_7_mc_4_2B_4H_2B_4H	ceq	methane	methanol	0.998311	0.00168864	298	1.00E+07	TRUE	174.3797147	7.102335067	178.403	7.2662	96.08648069	3.913519313	0.912306	6853.290598	22.55841
OPT_ceq_sym_3_on_2_sym_7_mc_4_ntn_edge_ntn_edge	ceq	methane	22-dimethylbutane	0.989153	0.0108468	298	4.00E+06	FALSE	11.26896309	86.46977306	6.5846	50.5254	11.52967957	88.47032043	0.622159	1130.828754	6.92927
OPT_ceq_sym_3_on_2_sym_7_mc_4_ntn_edge_ntn_edge	ceq	methane	22-dimethylbutane	0.992743	0.00725744	298	6.00E+06	FALSE	20.11559371	80.86780834	11.7538	47.2521	19.91970294	80.08029706	0.622159	1130.828754	6.92927
OPT_ceq_sym_3_on_2_sym_7_mc_4_ntn_edge_ntn_edge	ceq	methane	22-dimethylbutane	0.994547	0.00545297	298	8.00E+06	FALSE	32.39873952	73.97013364	18.931	43.2217	30.45885376	69.54114624	0.622159	1130.828754	6.92927
OPT_ceq_sym_3_on_2_sym_7_mc_4_ntn_edge_ntn_edge	ceq	methane	22-dimethylbutane	0.995633	0.00436714	298	1.00E+07	FALSE	37.23228028	71.60034152	21.7553	41.837	34.21058839	65.78941161	0.622159	1130.828754	6.92927
OPT_ceq_sym_3_on_2_sym_7_mc_4_ntn_edge_ntn_edge	ceq	methane	methanol	0.995789	0.00421093	298	4.00E+06	FALSE	126.059181	52.90333717	73.658	30.9121	70.43887306	29.56112694	0.622159	1130.828754	6.92927
OPT_ceq_sym_3_on_2_sym_7_mc_4_ntn_edge_ntn_edge	ceq	methane	methanol	0.995789	0.00421093	298	4.00E+06	TRUE	9.302208483	272.1098784	5.4354	158.9973	3.305546889	96.69445311	0.622159	1130.828754	6.92927
OPT_ceq_sym_3_on_2_sym_7_mc_4_ntn_edge_ntn_edge	ceq	methane	methanol	0.997189	0.00281124	298	6.00E+06	FALSE	171.6429804	6.824939693	100.2932	3.9879	96.17581709	3.824182906	0.622159	1130.828754	6.92927
OPT_ceq_sym_3_on_2_sym_7_mc_4_ntn_edge_ntn_edge	ceq	methane	methanol	0.997189	0.00281124	298	6.00E+06	TRUE	15.34811346	267.6651704	8.9681	156.4002	5.423107089	94.57689291	0.622159	1130.828754	6.92927
OPT_ceq_sym_3_on_2_sym_7_mc_4_ntn_edge_ntn_edge	ceq	methane	methanol	0.99789	0.00210991	298	8.00E+06	FALSE	181.7478411	4.755158088	106.1976	2.7785	97.45035838	2.549641619	0.622159	1130.828754	6.92927
OPT_ceq_sym_3_on_2_sym_7_mc_4_ntn_edge_ntn_edge	ceq	methane	methanol	0.99789	0.00210991	298	8.00E+06	TRUE	22.44550993	255.5838001	13.1152	149.3409	8.073073279	91.92692672	0.622159	1130.828754	6.92927
OPT_ceq_sym_3_on_2_sym_7_mc_4_ntn_edge_ntn_edge	ceq	methane	methanol	0.998311	0.00168864	298	1.00E+07	FALSE	194.3345914	0.537212209	113.5522	0.3139	99.72432533	0.275674674	0.622159	1130.828754	6.92927
OPT_ceq_sym_3_on_2_sym_7_mc_4_ntn_edge_ntn_edge	ceq	methane	methanol	0.998311	0.00168864	298	1.00E+07	TRUE	31.75370836	248.003272	18.5541	144.9115	11.3504615	88.6495385	0.622159	1130.828754	6.92927
OPT_csq_sym_5_on_9_sym_8_mc_9_1B_2Br	csq	methane	22-dimethylbutane	0.989153	0.0108468	298	4.00E+06	FALSE	71.27400801	33.3163033	88.3408	41.294	68.14589909	31.85410091	0.658735	945.512352	26.28499
OPT_csq_sym_5_on_9_sym_8_mc_9_1B_2Br	csq	methane	22-dimethylbutane	0.992743	0.00725744	298	6.00E+06	FALSE	97.10733437	22.17655266	120.36	27.4868	81.40859322	18.59140678	0.658735	945.512352	26.28499
OPT_csq_sym_5_on_9_sym_8_mc_9_1B_2Br	csq	methane	22-dimethylbutane	0.994547	0.00545297	298	8.00E+06	FALSE	117.5010041	16.62039307	145.637	20.6002	87.60794816	12.39205184	0.658735	945.512352	26.28499
OPT_csq_sym_5_on_9_sym_8_mc_9_1B_2Br	csq	methane	22-dimethylbutane	0.995633	0.00436714	298	1.00E+07	FALSE	135.9292911	12.28783752	168.478	15.2302	91.70956985	8.29043015	0.658735	945.512352	26.28499
OPT_csq_sym_5_on_9_sym_8_mc_9_1B_2Br	csq	methane	methanol	0.995789	0.00421093	298	4.00E+06	FALSE	94.68529866	10.47058461	117.358	12.9778	90.04279714	9.957202856	0.658735	945.512352	26.28499
OPT_csq_sym_5_on_9_sym_8_mc_9_1B_2Br	csq	methane	methanol	0.995789	0.00421093	298	4.00E+06	TRUE	87.11857512	44.66743747	107.9794	55.3632	66.10608623	33.89391377	0.658735	945.512352	26.28499
OPT_csq_sym_5_on_9_sym_8_mc_9_1B_2Br	csq	methane	methanol	0.997189	0.00281124	298	6.00E+06	FALSE	115.7563639	11.22575631	143.4746	13.9138	91.1595772	8.840422801	0.658735	945.512352	26.28499
OPT_csq_sym_5_on_9_sym_8_mc_9_1B_2Br	csq	methane	methanol	0.997189	0.00281124	298	6.00E+06	TRUE	104.5217327	45.70531447	129.5498	56.6496	69.57584181	30.42415819	0.658735	945.512352	26.28499
OPT_csq_sym_5_on_9_sym_8_mc_9_1B_2Br	csq	methane	methanol	0.99789	0.00210991	298	8.00E+06	FALSE	140.6170033	1.045783706	174.2882	1.2962	99.26177952	0.73822048	0.658735	945.512352	26.28499
OPT_csq_sym_5_on_9_sym_8_mc_9_1B_2Br	csq	methane	methanol	0.99789	0.00210991	298	8.00E+06	TRUE	128.0170927	33.25401777	158.6712	41.2168	79.38005283	20.61994717	0.658735	945.512352	26.28499
OPT_csq_sym_5_on_9_sym_8_mc_9_1B_2Br	csq	methane	methanol	0.998311	0.00168864	298	1.00E+07	FALSE	155.4896902	0.271409997	192.7222	0.3364	99.82575239	0.174247612	0.658735	945.512352	26.28499
OPT_csq_sym_5_on_9_sym_8_mc_9_1B_2Br	csq	methane	methanol	0.998311	0.00168864	298	1.00E+07	TRUE	141.3723363	27.16036311	175.2244	33.664	83.8842176	16.1157824	0.658735	945.512352	26.28499
OPT_csq_sym_5_on_9_sym_8_mc_9_1B_2CF3	csq	methane	22-dimethylbutane	0.989153	0.0108468	298	4.00E+06	FALSE	59.18926343	25.03492233	73.7836	31.2078	70.27585116	29.72414884	0.569652	872.938389	24.5033
OPT_csq_sym_5_on_9_sym_8_mc_9_1B_2CF3	csq	methane	22-dimethylbutane	0.992743	0.00725744	298	6.00E+06	FALSE	80.28570068	17.6785805	100.0818	22.0376	81.9540548	18.0459452	0.569652	872.938389	24.5033
OPT_csq_sym_5_on_9_sym_8_mc_9_1B_2CF3	csq	methane	22-dimethylbutane	0.994547	0.00545297	298	8.00E+06	FALSE	97.93861075	13.67142703	122.0874	17.0424	87.75071911	12.24928089	0.569652	872.938389	24.5033
OPT_csq_sym_5_on_9_sym_8_mc_9_1B_2CF3	csq	methane	22-dimethylbutane	0.995633	0.00436714	298	1.00E+07	FALSE	115.1498291	9.353661405	143.5424	11.66	92.48722958	7.512770421	0.569652	872.938389	24.5033
OPT_csq_sym_5_on_9_sym_8_mc_9_1B_2CF3	csq	methane	methanol	0.995789	0.00421093	298	4.00E+06	FALSE	78.22019405	4.872086379	97.507	6.0734	94.13653548	5.863464516	0.569652	872.938389	24.5033
OPT_csq_sym_5_on_9_sym_8_mc_9_1B_2CF3	csq	methane	methanol	0.995789	0.00421093	298	4.00E+06	TRUE	12.06221221	271.9133436	15.0364	338.9592	4.247623417	95.75237658	0.569652	872.938389	24.5033
OPT_csq_sym_5_on_9_sym_8_mc_9_1B_2CF3	csq	methane	methanol	0.997189	0.00281124	298	6.00E+06	FALSE	100.7867445	0.531698695	125.6378	0.6628	99.47522023	0.524779771	0.569652	872.938389	24.5033
OPT_csq_sym_5_on_9_sym_8_mc_9_1B_2CF3	csq	methane	methanol	0.997189	0.00281124	298	6.00E+06	TRUE	18.38066664	256.7483791	22.9128	320.055	6.68074379	93.31925621	0.569652	872.938389	24.5033
OPT_csq_sym_5_on_9_sym_8_mc_9_1B_2CF3	csq	methane	methanol	0.99789	0.00210991	298	8.00E+06	FALSE	116.5562475	0.294086816	145.2956	0.3666	99.7483218	0.251678198	0.569652	872.938389	24.5033
OPT_csq_sym_5_on_9_sym_8_mc_9_1B_2CF3	csq	methane	methanol	0.99789	0.00210991	298	8.00E+06	TRUE	27.97514873	245.67143	34.873	306.2468	10.22309464	89.77690536	0.569652	872.938389	24.5033
OPT_csq_sym_5_on_9_sym_8_mc_9_1B_2CF3	csq	methane	methanol	0.998311	0.00168864	298	1.00E+07	FALSE	130.4548578	0.195095236	162.6212	0.2432	99.85067332	0.149326679	0.569652	872.938389	24.5033
OPT_csq_sym_5_on_9_sym_8_mc_9_1B_2CF3	csq	methane	methanol	0.998311	0.00168864	298	1.00E+07	TRUE	34.73096304	241.0645512	43.2946	300.504	12.5930123	87.4069877	0.569652	872.938389	24.5033
OPT_csq_sym_5_on_9_sym_8_mc_9_1B_2CH3	csq	methane	22-dimethylbutane	0.989153	0.0108468	298	4.00E+06	FALSE	71.88344849	22.73457878	88.8924	28.114	75.97225451	24.02774549	0.628269	1308.700326	26.74799
OPT_csq_sym_5_on_9_sym_8_mc_9_1B_2CH3	csq	methane	22-dimethylbutane	0.992743	0.00725744	298	6.00E+06	FALSE	94.62239402	16.58215571	117.0118	20.5058	85.08859957	14.91140043	0.628269	1308.700326	26.74799
OPT_csq_sym_5_on_9_sym_8_mc_9_1B_2CH3	csq	methane	22-dimethylbutane	0.994547	0.00545297	298	8.00E+06	FALSE	114.355562	12.12791203	141.4142	14.9976	90.41146512	9.58853488	0.628269	1308.700326	26.74799
OPT_csq_sym_5_on_9_sym_8_mc_9_1B_2CH3	csq	methane	22-dimethylbutane	0.995633	0.00436714	298	1.00E+07	FALSE	133.9160009	8.027536586	165.603	9.927	94.34455649	5.655443514	0.628269	1308.700326	26.74799
OPT_csq_sym_5_on_9_sym_8_mc_9_1B_2CH3	csq	methane	methanol	0.995789	0.00421093	298	4.00E+06	FALSE	89.21991931	4.11315222	110.331	5.0864	95.59303883	4.406961169	0.628269	1308.700326	26.74799
OPT_csq_sym_5_on_9_sym_8_mc_9_1B_2CH3	csq	methane	methanol	0.995789	0.00421093	298	4.00E+06	TRUE	10.56510179	311.6697751	13.065	385.4166	3.27869593	96.72130407	0.628269	1308.700326	26.74799
OPT_csq_sym_5_on_9_sym_8_mc_9_1B_2CH3	csq	methane	methanol	0.997189	0.00281124	298	6.00E+06	FALSE	112.8315673	1.321021836	139.5296	1.6336	98.84275789	1.157242114	0.628269	1308.700326	26.74799
OPT_csq_sym_5_on_9_sym_8_mc_9_1B_2CH3	csq	methane	methanol	0.997189	0.00281124	298	6.00E+06	TRUE	18.24410727	294.7489539	22.561	364.492	5.828917487	94.17108251	0.628269	1308.700326	26.74799
OPT_csq_sym_5_on_9_sym_8_mc_9_1B_2CH3	csq	methane	methanol	0.99789	0.00210991	298	8.00E+06	FALSE	132.1041244	0.386052782	163.3624	0.4774	99.70861781	0.291382192	0.628269	1308.700326	26.74799
OPT_csq_sym_5_on_9_sym_8_mc_9_1B_2CH3	csq	methane	methanol	0.99789	0.00210991	298	8.00E+06	TRUE	28.41523145	281.0588785	35.1388	347.5626	9.181779842	90.81822016	0.628269	1308.700326	26.74799
OPT_csq_sym_5_on_9_sym_8_mc_9_1B_2CH3	csq	methane	methanol	0.998311	0.00168864	298	1.00E+07	FALSE	146.2902298	0.217205231	180.9052	0.2686	99.85174457	0.148255432	0.628269	1308.700326	26.74799
OPT_csq_sym_5_on_9_sym_8_mc_9_1B_2CH3	csq	methane	methanol	0.998311	0.00168864	298	1.00E+07	TRUE	37.14775508	271.7827758	45.9376	336.0916	12.02463058	87.97536942	0.628269	1308.700326	26.74799
OPT_csq_sym_5_on_9_sym_8_mc_9_1B_2CN	csq	methane	22-dimethylbutane	0.989153	0.0108468	298	4.00E+06	FALSE	74.83291698	21.20039457	93.1596	26.3924	77.92391595	22.07608405	0.646026	1322.993952	25.76084
OPT_csq_sym_5_on_9_sym_8_mc_9_1B_2CN	csq	methane	22-dimethylbutane	0.992743	0.00725744	298	6.00E+06	FALSE	98.91819876	15.27815828	123.1434	19.0198	86.6211509	13.3788491	0.646026	1322.993952	25.76084
OPT_csq_sym_5_on_9_sym_8_mc_9_1B_2CN	csq	methane	22-dimethylbutane	0.994547	0.00545297	298	8.00E+06	FALSE	117.8364848	11.46645066	146.6948	14.2746	91.13210337	8.867896631	0.646026	1322.993952	25.76084
OPT_csq_sym_5_on_9_sym_8_mc_9_1B_2CN	csq	methane	22-dimethylbutane	0.995633	0.00436714	298	1.00E+07	FALSE	133.5259207	9.743261921	166.2266	12.1294	93.19933167	6.800668326	0.646026	1322.993952	25.76084
OPT_csq_sym_5_on_9_sym_8_mc_9_1B_2CN	csq	methane	methanol	0.995789	0.00421093	298	4.00E+06	FALSE	91.78960183	6.632814676	114.269	8.2572	93.26086992	6.73913008	0.646026	1322.993952	25.76084
OPT_csq_sym_5_on_9_sym_8_mc_9_1B_2CN	csq	methane	methanol	0.995789	0.00421093	298	4.00E+06	TRUE	41.41099185	136.8339739	51.5526	170.3448	23.23262913	76.76737087	0.646026	1322.993952	25.76084
OPT_csq_sym_5_on_9_sym_8_mc_9_1B_2CN	csq	methane	methanol	0.997189	0.00281124	298	6.00E+06	FALSE	117.3958073	1.903283328	146.1462	2.3694	98.40461204	1.595387959	0.646026	1322.993952	25.76084
OPT_csq_sym_5_on_9_sym_8_mc_9_1B_2CN	csq	methane	methanol	0.997189	0.00281124	298	6.00E+06	TRUE	59.0954452	125.3583659	73.568	156.0588	32.03807221	67.96192779	0.646026	1322.993952	25.76084
OPT_csq_sym_5_on_9_sym_8_mc_9_1B_2CN	csq	methane	methanol	0.99789	0.00210991	298	8.00E+06	FALSE	135.1380966	0.453208599	168.2336	0.5642	99.66575394	0.334246062	0.646026	1322.993952	25.76084
OPT_csq_sym_5_on_9_sym_8_mc_9_1B_2CN	csq	methane	methanol	0.99789	0.00210991	298	8.00E+06	TRUE	77.85275464	113.2537924	96.919	140.9898	40.73787939	59.26212061	0.646026	1322.993952	25.76084
OPT_csq_sym_5_on_9_sym_8_mc_9_1B_2CN	csq	methane	methanol	0.998311	0.00168864	298	1.00E+07	FALSE	150.0878754	0.260582895	186.8446	0.3244	99.8266807	0.1733193	0.646026	1322.993952	25.76084
OPT_csq_sym_5_on_9_sym_8_mc_9_1B_2CN	csq	methane	methanol	0.998311	0.00168864	298	1.00E+07	TRUE	89.51279493	109.9520047	111.4346	136.8794	44.87648703	55.12351297	0.646026	1322.993952	25.76084
OPT_csq_sym_5_on_9_sym_8_mc_9_1B_2F	csq	methane	22-dimethylbutane	0.989153	0.0108468	298	4.00E+06	FALSE	65.009853	47.41953651	80.8096	58.9442	57.82282843	42.17717157	0.702222	1492.387752	27.65704
OPT_csq_sym_5_on_9_sym_8_mc_9_1B_2F	csq	methane	22-dimethylbutane	0.992743	0.00725744	298	6.00E+06	FALSE	95.36134261	30.57240031	118.5376	38.0026	75.7234244	24.2765756	0.702222	1492.387752	27.65704
OPT_csq_sym_5_on_9_sym_8_mc_9_1B_2F	csq	methane	22-dimethylbutane	0.994547	0.00545297	298	8.00E+06	FALSE	117.6162055	21.63476833	146.2012	26.8928	84.46347072	15.53652928	0.702222	1492.387752	27.65704
OPT_csq_sym_5_on_9_sym_8_mc_9_1B_2F	csq	methane	22-dimethylbutane	0.995633	0.00436714	298	1.00E+07	FALSE	143.0751586	14.17690019	177.8476	17.6224	90.98460122	9.015398782	0.702222	1492.387752	27.65704
OPT_csq_sym_5_on_9_sym_8_mc_9_1B_2F	csq	methane	methanol	0.995789	0.00421093	298	4.00E+06	FALSE	102.2541427	7.386430156	127.1056	9.1816	93.26305038	6.736949618	0.702222	1492.387752	27.65704
OPT_csq_sym_5_on_9_sym_8_mc_9_1B_2F	csq	methane	methanol	0.995789	0.00421093	298	4.00E+06	TRUE	65.03430925	110.2331542	80.84	137.0238	37.10575139	62.89424861	0.702222	1492.387752	27.65704
OPT_csq_sym_5_on_9_sym_8_mc_9_1B_2F	csq	methane	methanol	0.997189	0.00281124	298	6.00E+06	FALSE	131.0973898	1.335439799	162.9588	1.66	98.99160971	1.008390293	0.702222	1492.387752	27.65704
[truncated: 22,613 more rows]
